# Supplementary material for: Determination of the absolute configuration of conformationally flexible molecules by simulation of chiro-optical spectra: a case study
Source: Royal Society of Chemistry journal article supplement (doi:10.1039/c9ra03526e), 2019-01-01
Supplement: c9ra03526e1.pdf [file c9ra03526e1.pdf]

# Determination of the Absolute Configuration of Conformationally Flexible Molecules by Simulation of Chiro-optical Spectra: a Case Study.

Michele Mancinelli<sup>a</sup>, Roberta Franzini<sup>b</sup>, Andrea Renzetti<sup>c</sup>, Emanuela Marotta<sup>a</sup>,  
Claudio Villani<sup>\*b</sup> and Andrea Mazzanti<sup>\*a</sup>

## SUPPORTING INFORMATION

### Summary:

Pages 2-35: Figures S1-S29 and Tables S1-S3

Pages 36-48: X-ray data of **1a** and **2b**

Pages 49-219 XYZ coordinates for all the optimized structures.

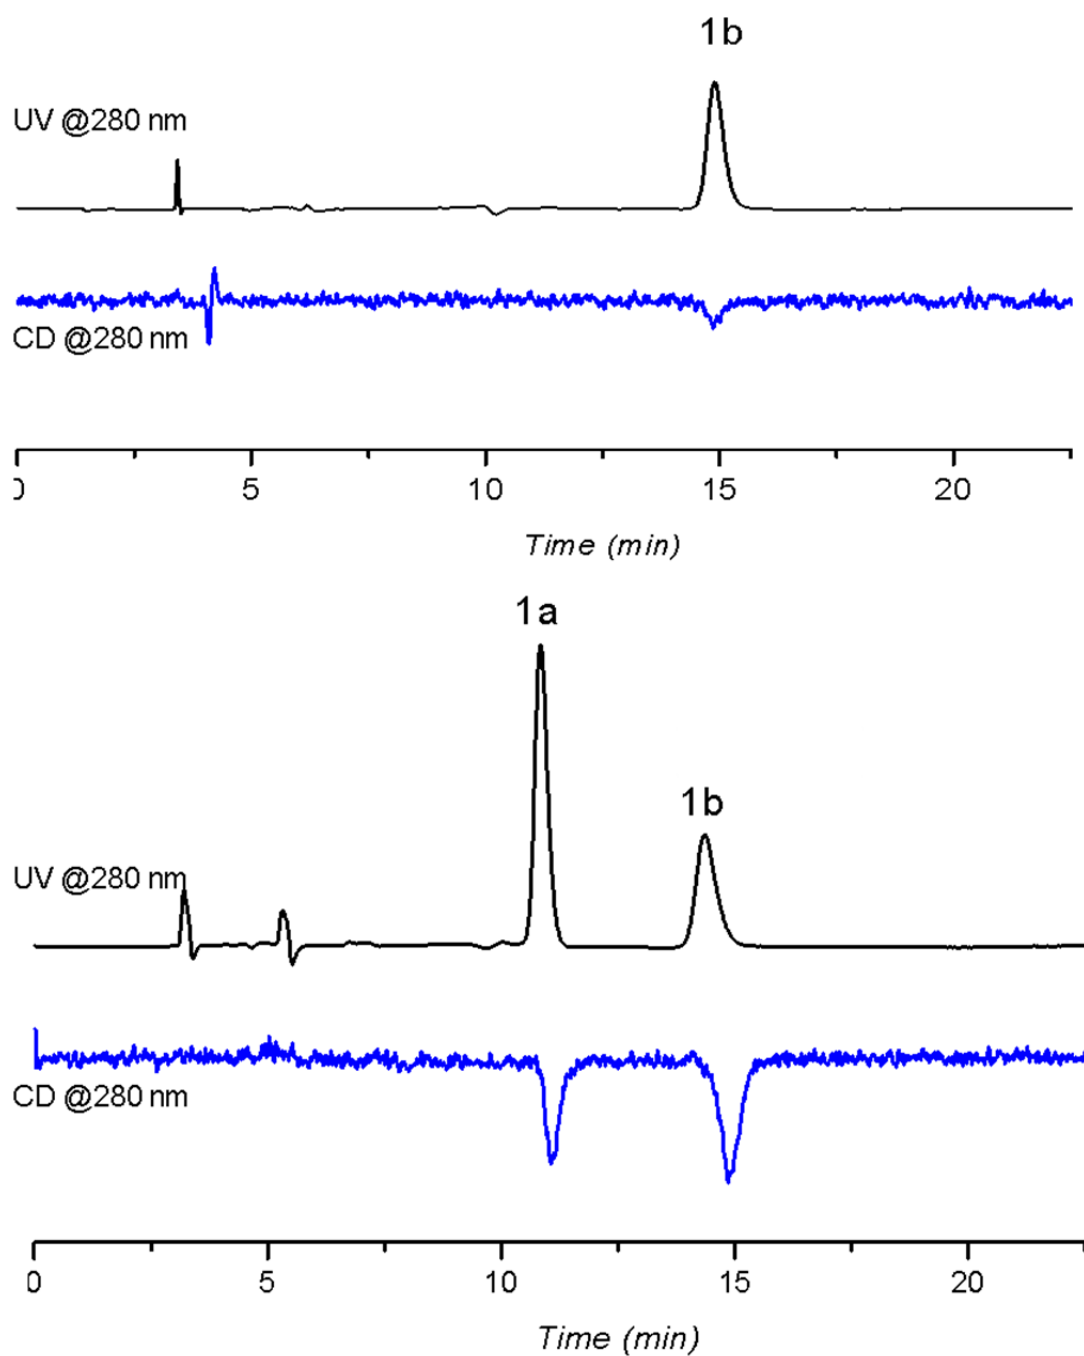

**Figure S1.** Top: HPLC chromatogram (Daicel Chiralpak IA, hexane/2-propanol 93:7, 1 mL/min, 25°C) of compound **1b** after semi-preparative HPLC separation. Bottom: HPLC chromatogram of the same sample after 18 h stirring in a solution of Et<sub>3</sub>N 0.1 M in ethanol.

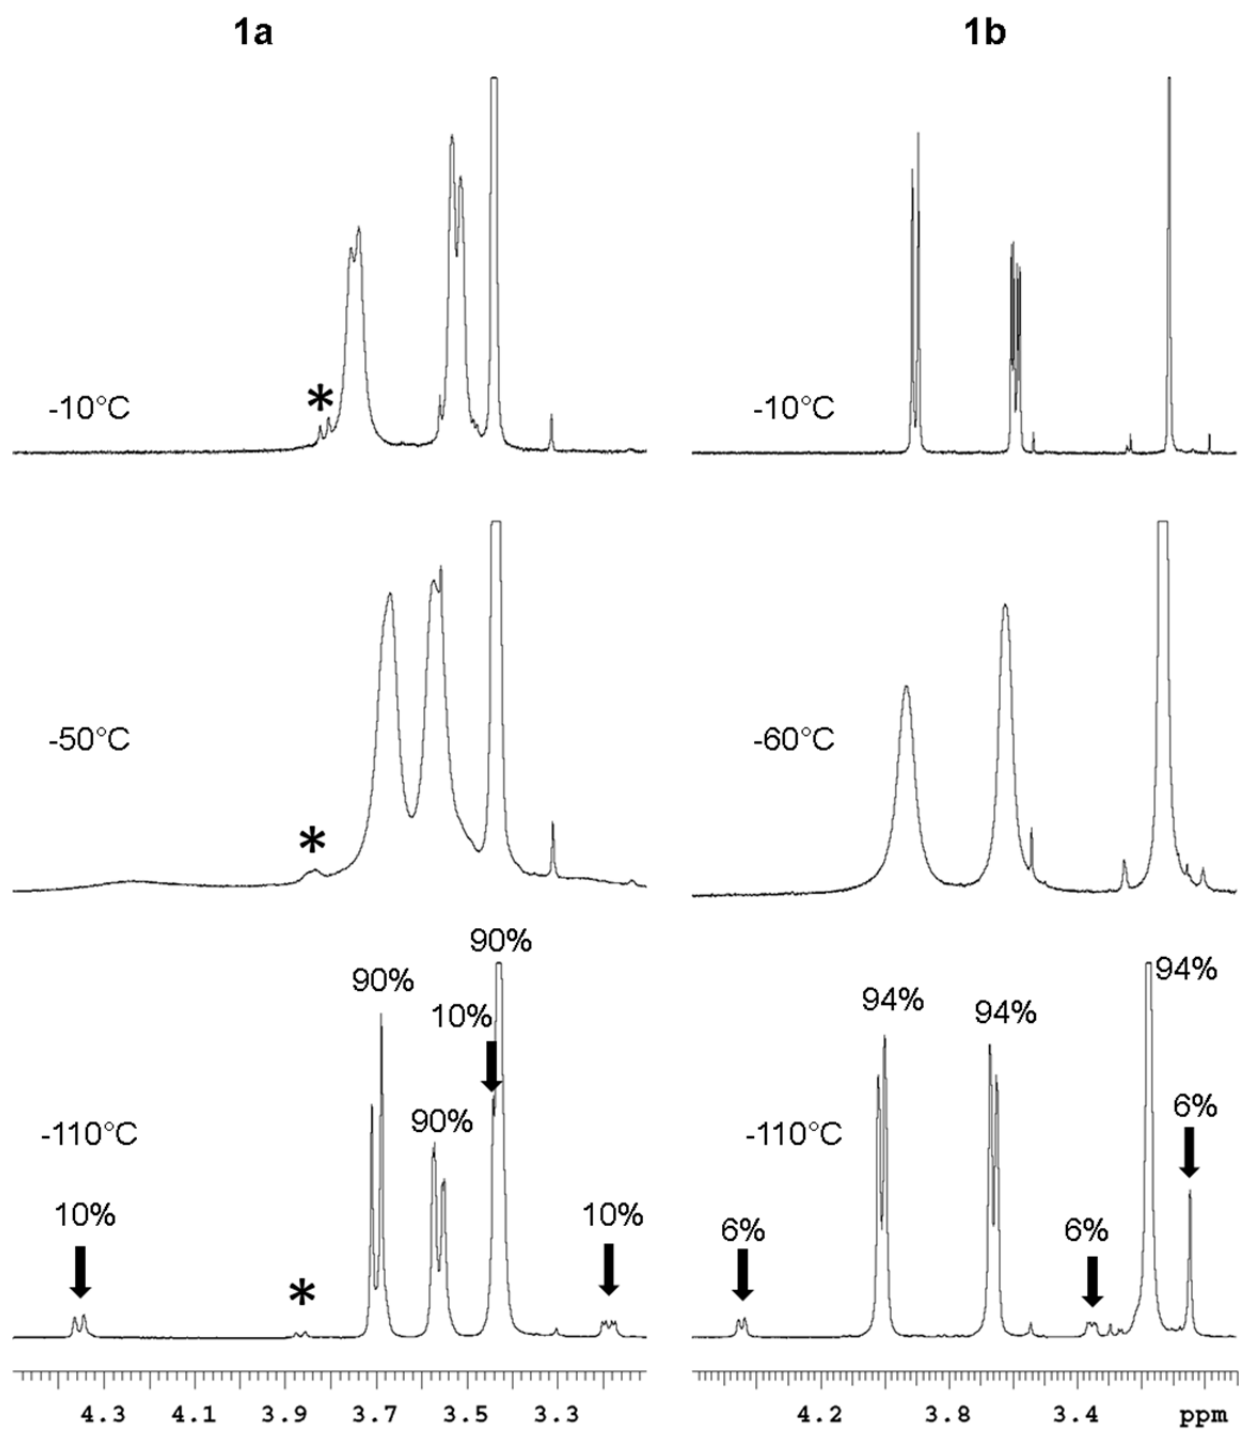

**Figure S2.** Variable temperature  $^1\text{H}$ -NMR spectra of compounds **1a/2a** and **1b/2b** (600 MHz in  $\text{CDCl}_2$ ). The two spectra at  $-110^\circ\text{C}$  show the formation of the *sp/ap* conformers due to the frozen rotation around the indole—CH bond.

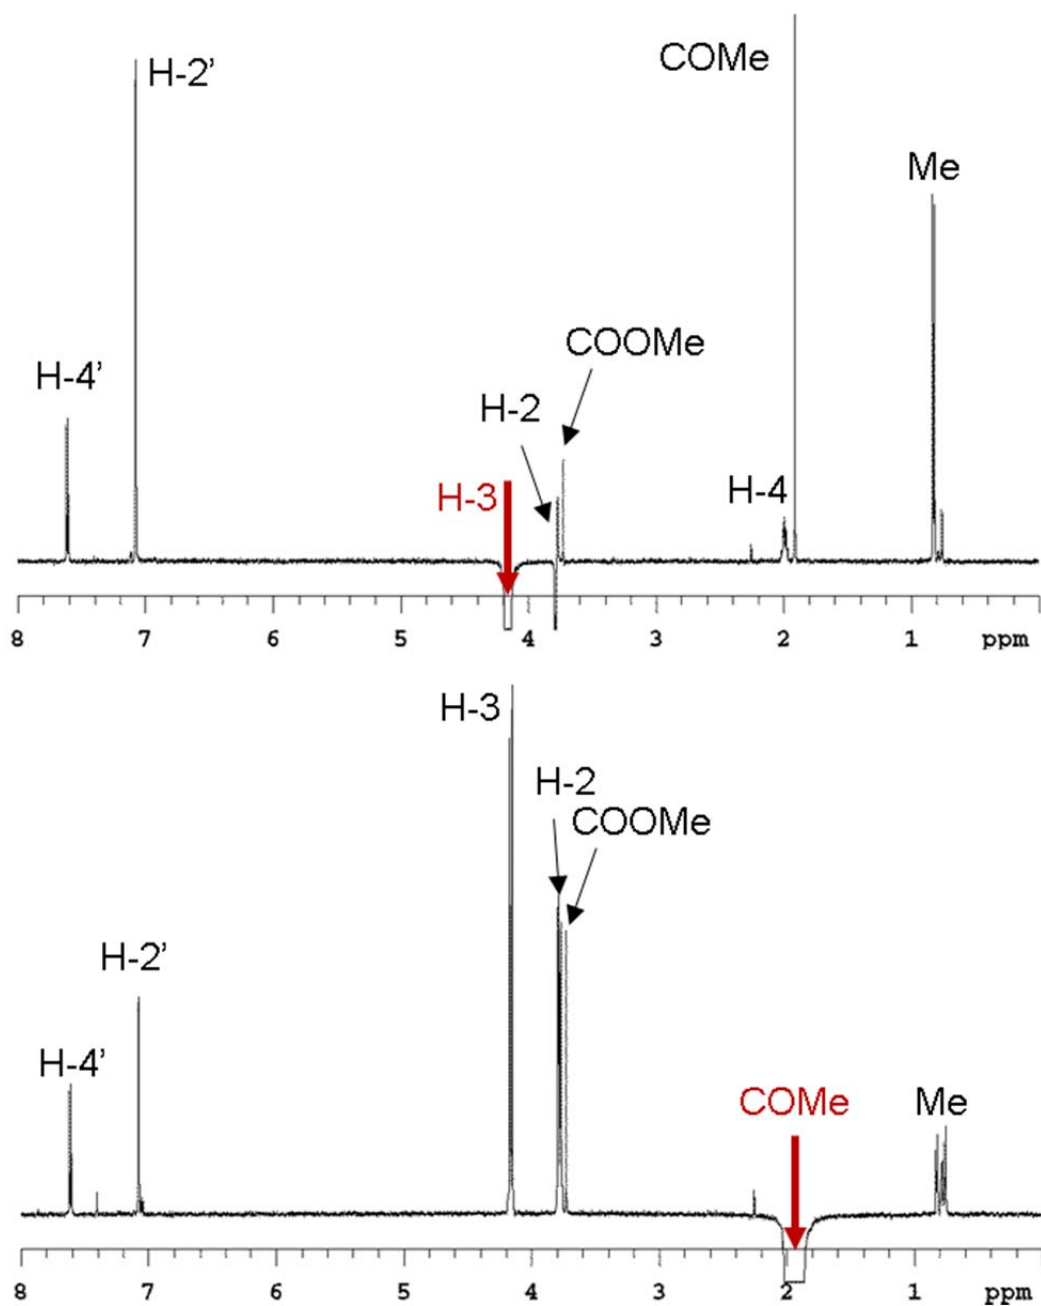

**Figure S3.** NOE spectra of **1a/2a** (600 MHz in CD<sub>3</sub>CN, +25 °C). Top: saturation of the benzylic H3 signal; bottom: saturation of the COMe signal.

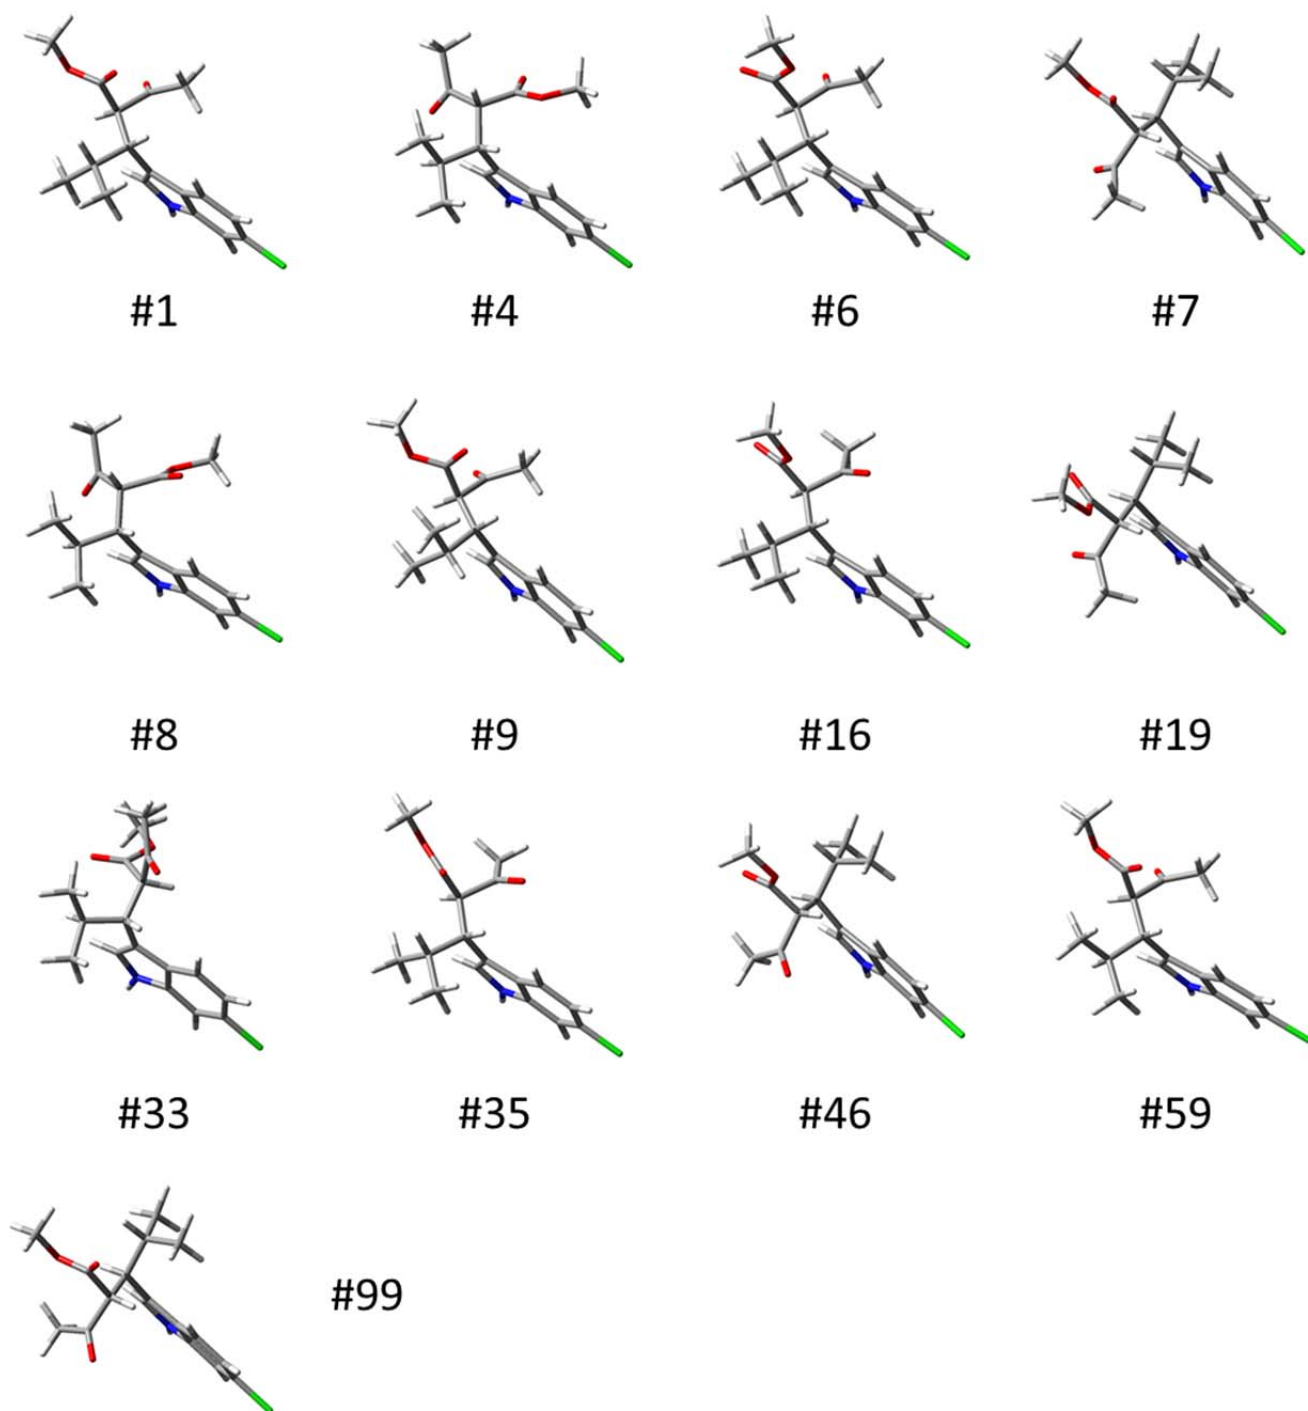

**Figure S4.** 3D geometries of the thirteen conformations of compound **1a** after optimization at the B3LYP/6-31G(d) level of theory. The geometric parameters and relative energies are reported in Table 1 of the main text.

**Table S1.** NMR coupling constants calculations for **1a**. The populations for each functional were derived from the data of Table 4. The  $^3J$  calculations were obtained at the GIAO-B3LYP/6-311++G(2d,p)//B3LYP/6-31G(d). level. Experimental values were 3.9 and 11.9 Hz.

| Conf #                                 | Calcd. H2-H <sub>IPr</sub> $^3J$ (Hz) | Calcd. H2-H3 $^3J$ (Hz) | B3LYP |                     |                     | M06-2x |                     |                     | M11   |                     |                     | $\omega$ B97X-D |                     |                     |
|----------------------------------------|---------------------------------------|-------------------------|-------|---------------------|---------------------|--------|---------------------|---------------------|-------|---------------------|---------------------|-----------------|---------------------|---------------------|
|                                        |                                       |                         | Pop % | J (Hz) <sup>a</sup> | J (Hz) <sup>a</sup> | Pop %  | J (Hz) <sup>a</sup> | J (Hz) <sup>a</sup> | Pop % | J (Hz) <sup>a</sup> | J (Hz) <sup>a</sup> | Pop %           | J (Hz) <sup>a</sup> | J (Hz) <sup>a</sup> |
| 1                                      | 3.1                                   | 13.7                    | 22.4  | 0.69                | 3.06                | 27.4   | 0.84                | 3.75                | 31.4  | 0.97                | 4.30                | 37.4            | 1.15                | 5.13                |
| 4                                      | 11.2                                  | 6.0                     | 1.3   | 0.15                | 0.08                | 16.8   | 1.88                | 1.00                | 17.1  | 1.92                | 1.02                | 2.2             | 0.25                | 0.13                |
| 6                                      | 3.3                                   | 14.1                    | 6.1   | 0.20                | 0.86                | 12.4   | 0.41                | 1.74                | 16.2  | 0.54                | 2.28                | 18.7            | 0.62                | 2.63                |
| 7                                      | 3.6                                   | 13.2                    | 2.0   | 0.07                | 0.26                | 2.2    | 0.08                | 0.29                | 1.6   | 0.06                | 0.21                | 4.1             | 0.15                | 0.54                |
| 8                                      | 11.4                                  | 5.1                     | 0.9   | 0.10                | 0.05                | 4.5    | 0.51                | 0.23                | 6.2   | 0.71                | 0.32                | 1.2             | 0.14                | 0.06                |
| 9                                      | 2.7                                   | 13.3                    | 1.1   | 0.03                | 0.15                | 3.7    | 0.10                | 0.49                | 4.4   | 0.12                | 0.58                | 2.0             | 0.05                | 0.26                |
| 16                                     | 3.7                                   | 13.2                    | 18.6  | 0.68                | 2.45                | 10.3   | 0.38                | 1.36                | 8.1   | 0.30                | 1.07                | 6.8             | 0.25                | 0.90                |
| 19                                     | 3.6                                   | 13.2                    | 4.2   | 0.15                | 0.55                | 3.6    | 0.13                | 0.47                | 2.2   | 0.08                | 0.29                | 6.5             | 0.23                | 0.85                |
| 33                                     | 11.6                                  | 3.1                     | 0.3   | 0.03                | 0.01                | 0.3    | 0.04                | 0.01                | 0.4   | 0.05                | 0.01                | 0.1             | 0.01                | 0.00                |
| 35                                     | 3.7                                   | 13.1                    | 37.1  | 1.38                | 4.87                | 10.3   | 0.38                | 1.35                | 6.1   | 0.23                | 0.80                | 9.7             | 0.36                | 1.27                |
| 46                                     | 3.1                                   | 13.8                    | 2.4   | 0.07                | 0.33                | 3.4    | 0.11                | 0.47                | 2.7   | 0.08                | 0.37                | 6.9             | 0.21                | 0.95                |
| 59                                     | 10.6                                  | 11.6                    | 3.2   | 0.34                | 0.37                | 4.3    | 0.45                | 0.49                | 2.9   | 0.30                | 0.33                | 2.6             | 0.28                | 0.31                |
| 99                                     | 4.4                                   | 0.1                     | 0.5   | 0.02                | 0.00                | 0.9    | 0.04                | 0.00                | 0.8   | 0.04                | 0.00                | 1.8             | 0.08                | 0.00                |
|                                        |                                       |                         |       |                     |                     |        |                     |                     |       |                     |                     |                 |                     |                     |
| Boltzmann weighted calcd. $^3J$ values |                                       |                         |       | <b>3.9</b>          | <b>13.0</b>         |        | <b>5.4</b>          | <b>11.7</b>         |       | <b>5.4</b>          | <b>11.6</b>         |                 | <b>3.8</b>          | <b>13.0</b>         |
| Experimental values                    |                                       |                         |       | <b>3.9</b>          | <b>11.9</b>         |        | <b>3.9</b>          | <b>11.9</b>         |       | <b>3.9</b>          | <b>11.9</b>         |                 | <b>3.9</b>          | <b>11.9</b>         |

<sup>a</sup> These values are the contributions to the weighted  $J$  value of each conformation, i.e. the calculated  $J$  value multiplied for the population.

**Table S2** Relative energies of the best thirteen conformations of **1a** calculated with B3LYP using two different basis sets, with or without the solvent (IEF-PCM). Relative energies in kcal/mol. The columns reporting the enthalpies ( $H^\circ$ ) are those of table 3 of the main text.

| B3LYP/6-31G(d) |      |           |           |
|----------------|------|-----------|-----------|
| Conf. #        | E    | $H^\circ$ | $G^\circ$ |
| 1              | 0.00 | 0.00      | 0.00      |
| 4              | 0.28 | 0.11      | 0.25      |
| 8              | 0.89 | 0.76      | 0.90      |
| 9              | 1.00 | 1.04      | 1.53      |
| 35             | 1.31 | 1.16      | 0.47      |
| 16             | 1.34 | 1.21      | 0.69      |
| 59             | 1.33 | 1.22      | 1.57      |
| 19             | 1.29 | 1.25      | 1.29      |
| 7              | 1.56 | 1.56      | 1.50      |
| 6              | 1.68 | 1.68      | 1.75      |
| 33             | 1.94 | 1.76      | 1.89      |
| 46             | 1.90 | 1.90      | 1.93      |
| 99             | 3.74 | 3.75      | 3.89      |

| B3LYP/6-311++G(2d,p) |      |           |           |
|----------------------|------|-----------|-----------|
| Conf. #              | E    | $H^\circ$ | $G^\circ$ |
| 1                    | 0.00 | 0.00      | 0.00      |
| 8                    | 1.76 | 0.97      | 1.52      |
| 4                    | 1.27 | 1.09      | 1.17      |
| 16                   | 1.52 | 1.40      | 0.87      |
| 9                    | 1.41 | 1.42      | 1.65      |
| 35                   | 1.63 | 1.47      | 0.92      |
| 7                    | 1.84 | 1.49      | 1.66      |
| 59                   | 1.77 | 1.65      | 1.59      |
| 19                   | 1.73 | 1.68      | 1.60      |
| 6                    | 1.71 | 1.70      | 1.63      |
| 46                   | 2.04 | 2.03      | 2.06      |
| 33                   | 2.55 | 2.38      | 2.40      |
| 99                   | 3.93 | 3.90      | 3.80      |

| PCM-B3LYP/6-31G(d) |      |           |           |
|--------------------|------|-----------|-----------|
| Conf. #            | E    | $H^\circ$ | $G^\circ$ |
| 35                 | 0.00 | 0.00      | 0.00      |
| 1                  | 0.39 | 0.51      | 1.27      |
| 16                 | 0.47 | 0.55      | 1.12      |
| 4                  | 1.22 | 1.17      | 1.79      |
| 19                 | 1.05 | 1.21      | 1.73      |
| 8                  | 1.56 | 1.55      | 2.30      |
| 6                  | 1.41 | 1.59      | 2.47      |
| 46                 | 1.51 | 1.68      | 2.49      |
| 7                  | 1.59 | 1.72      | 2.58      |
| 59                 | 1.83 | 1.85      | 2.74      |
| 9                  | 1.80 | 1.95      | 3.03      |
| 33                 | 2.45 | 2.44      | 2.23      |
| 99                 | 2.63 | 2.84      | 3.64      |

| PCM-B3LYP/6-311++G(2d,p) |      |           |           |
|--------------------------|------|-----------|-----------|
| Conf. #                  | E    | $H^\circ$ | $G^\circ$ |
| 35                       | 0.00 | 0.00      | 0.00      |
| 1                        | 0.24 | 0.30      | 0.61      |
| 16                       | 0.42 | 0.41      | 0.74      |
| 6                        | 1.02 | 1.07      | 1.20      |
| 19                       | 1.23 | 1.29      | 1.64      |
| 59                       | 2.09 | 1.45      | 3.32      |
| 46                       | 1.54 | 1.62      | 2.02      |
| 7                        | 1.70 | 1.74      | 1.92      |
| 4                        | 2.06 | 1.97      | 2.49      |
| 9                        | 2.05 | 2.09      | 2.50      |
| 8                        | 2.30 | 2.20      | 2.71      |
| 99                       | 2.39 | 2.52      | 2.87      |
| 33                       | 3.11 | 2.95      | 3.27      |

**Table S3.** Comparison between two different solvation model in the case of **1a**. The optimizations using the SMD model were performed for the conformations that were found within 1 kcal/mol from the global minimum of the PCM calculations. Relative energies in kcal/mol as ZPE corrected enthalpies, using the 6-311++G(2d,p) basis set.

| conf # | PCM model          |                    |                    |                    | SMD model          |                    |                    |                    |
|--------|--------------------|--------------------|--------------------|--------------------|--------------------|--------------------|--------------------|--------------------|
|        | B3-LYP             | M06-2x             | M11                | ωB97XD             | B3LYP              | M06-2x             | M11                | ωB97XD             |
| 35     | <b><u>0.00</u></b> | <b>0.58</b>        | <b>0.97</b>        | <b>0.80</b>        | <b><u>0.00</u></b> | <b>0.22</b>        | <b>0.69</b>        | <b>0.40</b>        |
| 1      | <b>0.30</b>        | <b><u>0.00</u></b> | <b><u>0.00</u></b> | <b><u>0.00</u></b> | <b>0.41</b>        | <b><u>0.00</u></b> | <b><u>0.00</u></b> | <b><u>0.00</u></b> |
| 16     | <b>0.41</b>        | <b>0.58</b>        | <b>0.80</b>        | 1.01               | <b>0.29</b>        | <b>0.25</b>        | <b>0.39</b>        | <b>0.45</b>        |
| 6      | 1.07               | <b>0.47</b>        | <b>0.39</b>        | <b>0.41</b>        |                    | <b>0.57</b>        | <b>0.40</b>        |                    |
| 19     | 1.29               | 1.20               | 1.57               | 1.04               |                    |                    |                    |                    |
| 59     | 1.45               | 1.10               | 1.42               | 1.57               |                    |                    |                    |                    |
| 46     | 1.62               | 1.23               | 1.46               | 1.00               |                    |                    |                    |                    |
| 7      | 1.74               | 1.49               | 1.78               | 1.31               |                    |                    |                    |                    |
| 4      | 1.97               | <b>0.29</b>        | <b>0.36</b>        | 1.67               |                    | <b>0.41</b>        | <b>0.31</b>        |                    |
| 9      | 2.09               | 1.19               | 1.17               | 1.74               |                    |                    |                    |                    |
| 8      | 2.20               | 1.07               | 0.96               | 2.04               |                    |                    |                    |                    |
| 99     | 2.52               | 1.99               | 2.16               | 1.81               |                    |                    |                    |                    |
| 33     | 2.95               | 2.66               | 2.60               | 3.48               |                    |                    |                    |                    |



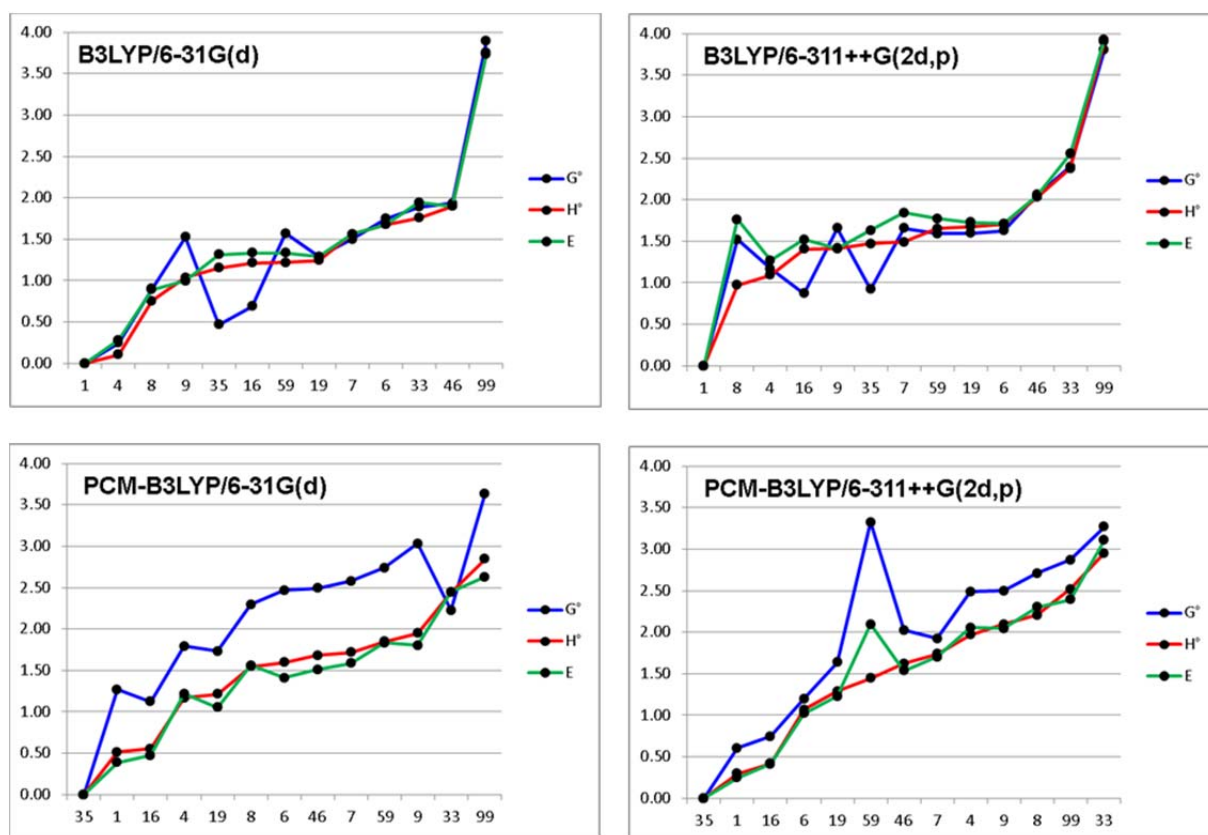

**Figure S5.** Relative energies (in kcal/mol) of the thirteen conformations of compound **1a** calculated with various optimization methods. Green line = relative energy in terms of uncorrected internal energy (E); red line = ZPE-corrected enthalpy ( $H^\circ$ ); blue line = ZPE-corrected Gibbs free energy in standard conditions ( $G^\circ$ ). Conformations are arranged on abscissa in increasing order of  $H^\circ$ . The bottom-right quadrant is also reported in the main text.

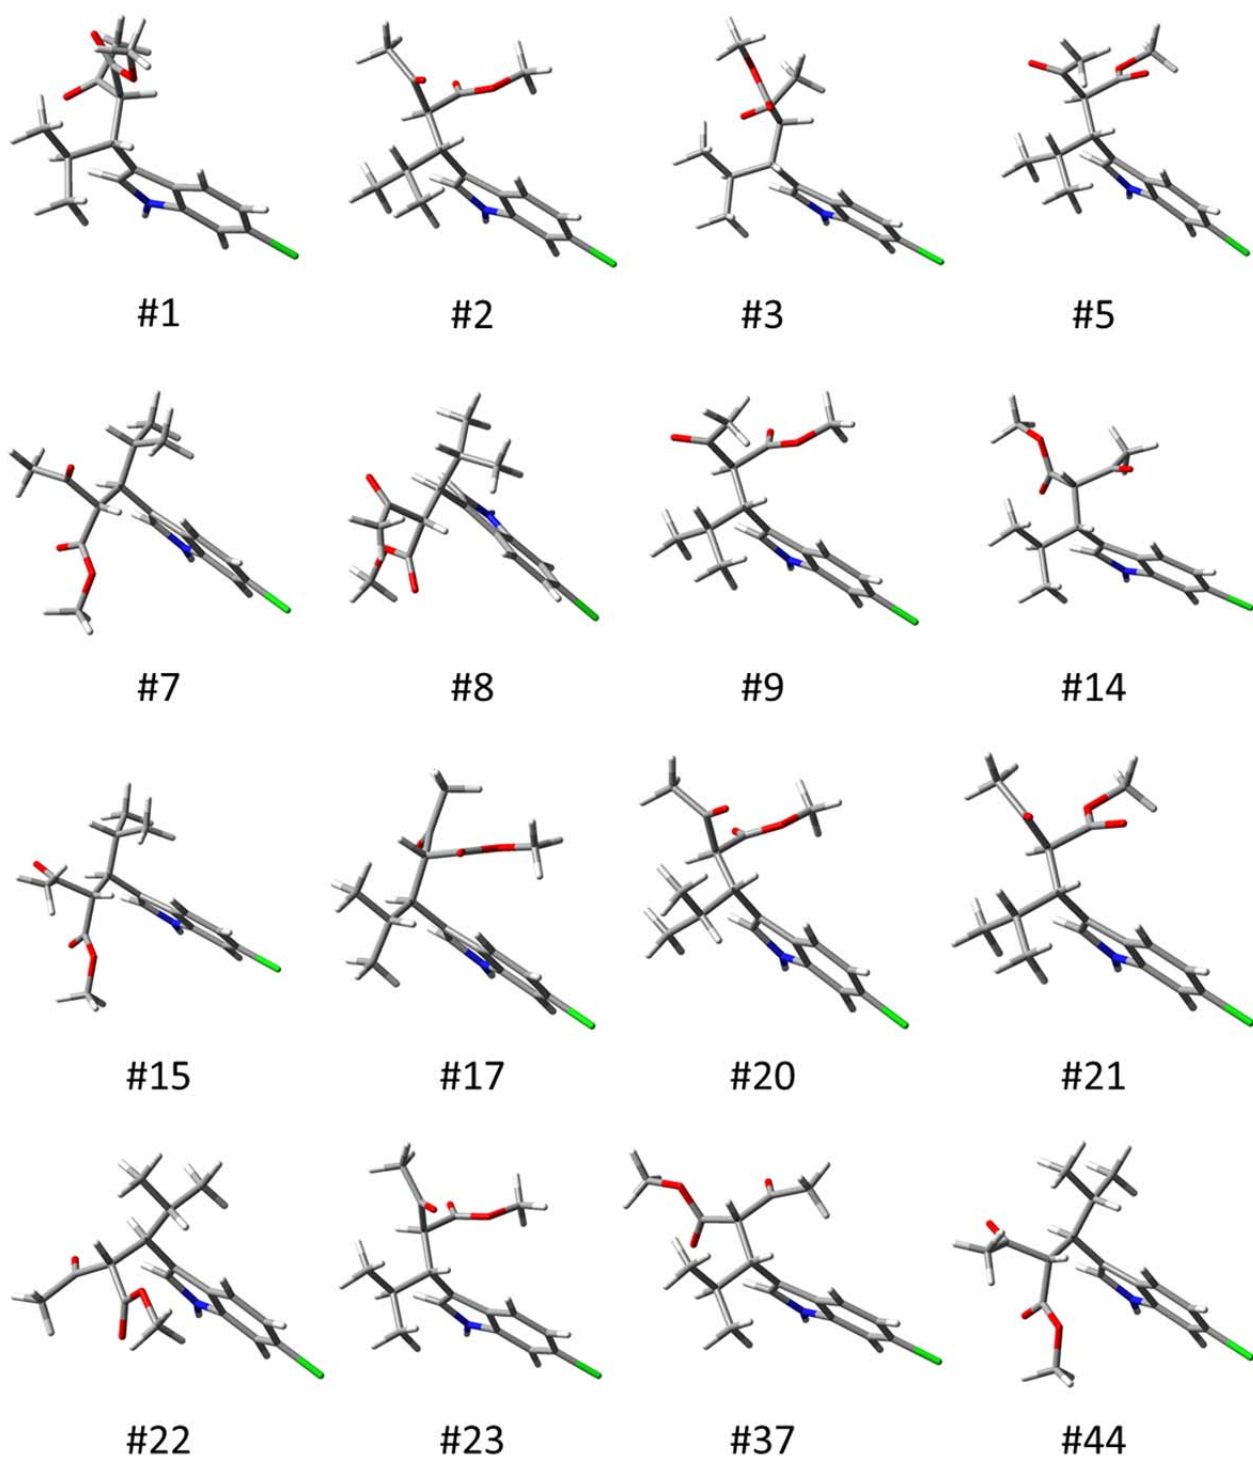

**Figure S6.** 3D geometries of the sixteen conformations of compound **1b** after optimization at the B3LYP/6-31G(d) level of theory. The geometric parameters and relative energies are reported in Table 2 of the main text.

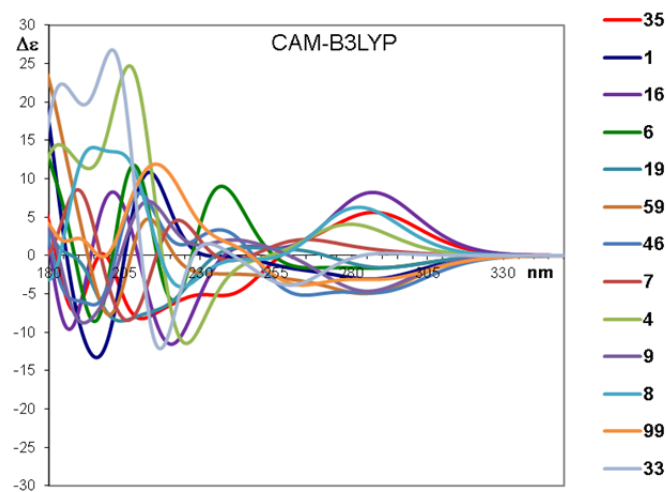

**Figure S7.** Example of ECD simulations of the thirteen conformations of **1a**, obtained at the TD-CAM-B3LYP/6-311++G(2d,p)//PCM-B3LYP/6-311++G(2d,p) level.

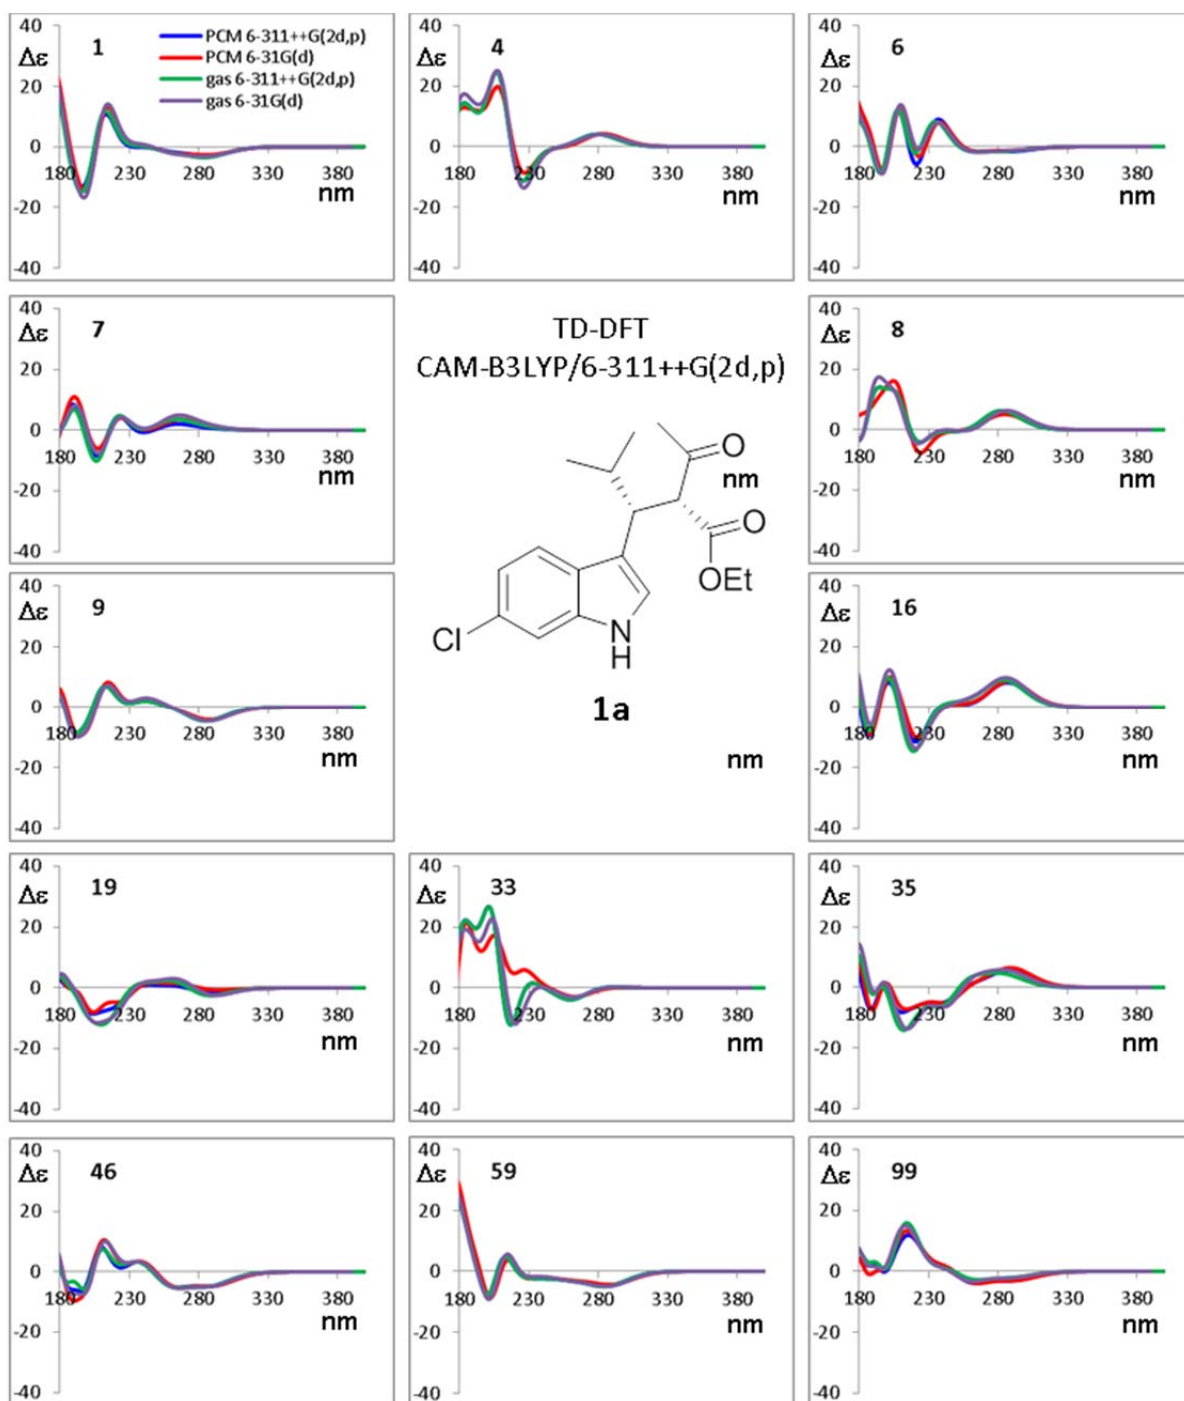

**Figure S8.** TD-DFT simulations obtained at the CAM-B3LYP/6-311++G(2d,p) level using the four geometries optimized by B3LYP, using the 6-31G(d) and 6-311++G(2d,p) basis sets, in both the gas phase and including the solvent acetonitrile.

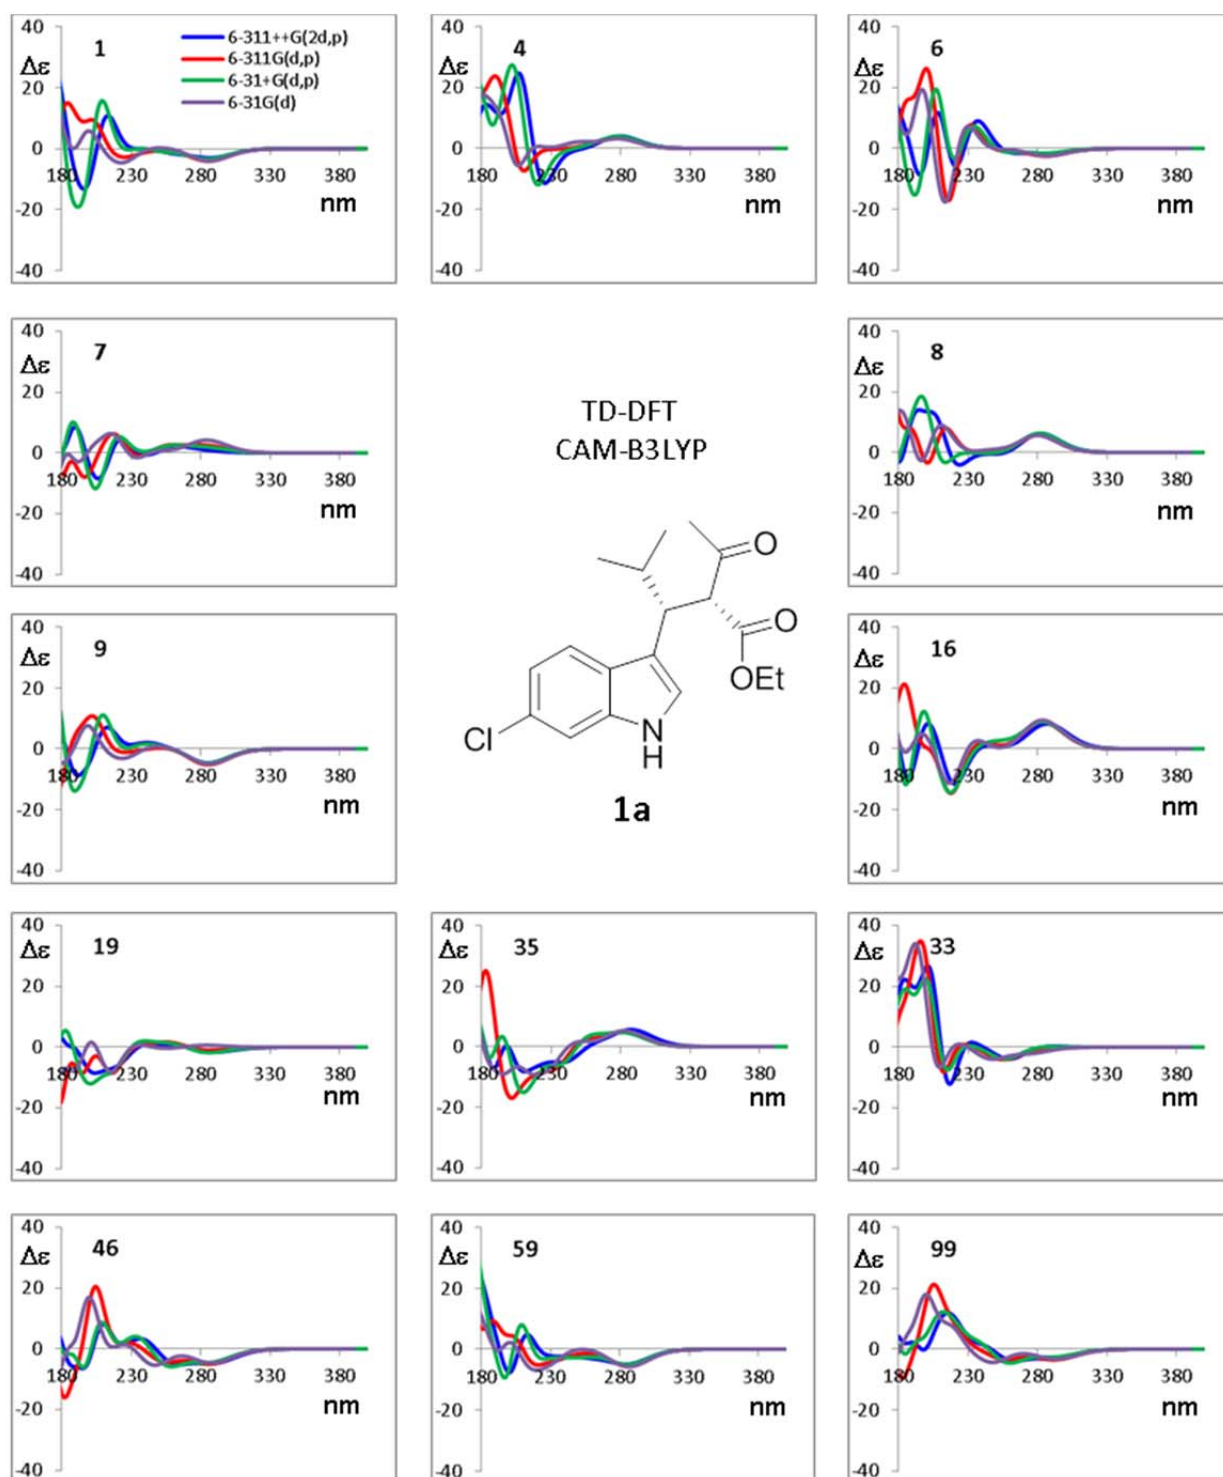

**Figure S9.** ECD simulation for the conformations of **1a**. The number in each quadrant is the conformation label; the four colored lines are the ECD spectra obtained by TD-DFT at the CAM-B3LYP level of theory using four basis sets (top-left quadrant). Optimized geometries at the PCM-B3LYP/6-311++G(2d,p) level.

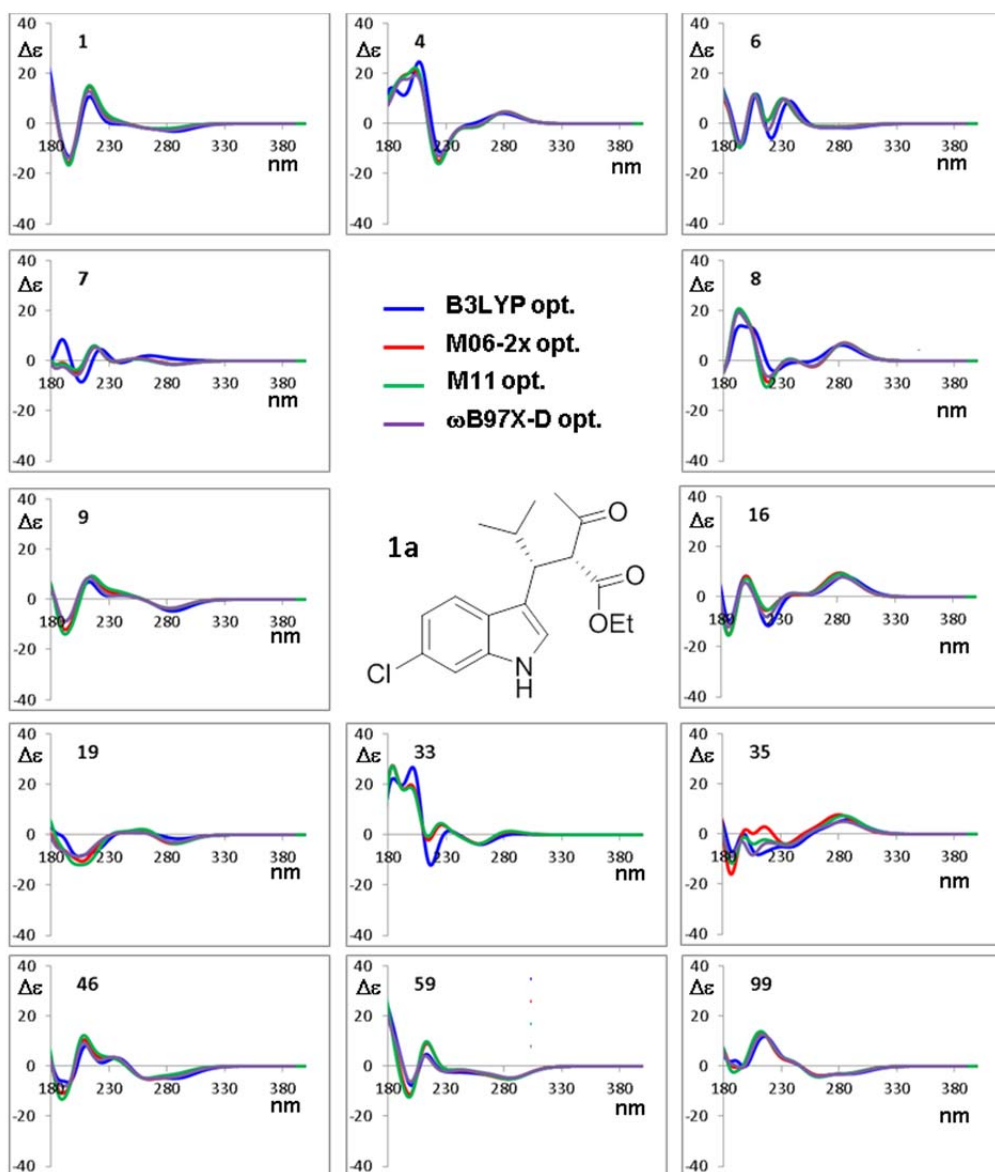

**Figure S10.** ECD simulation for the conformations of **1a**. The number in each quadrant is the conformation label; the four colored lines are the ECD spectra obtained by TD-DFT at the B3LYP/6-311++G(2d,p) level with the four different optimized geometries.

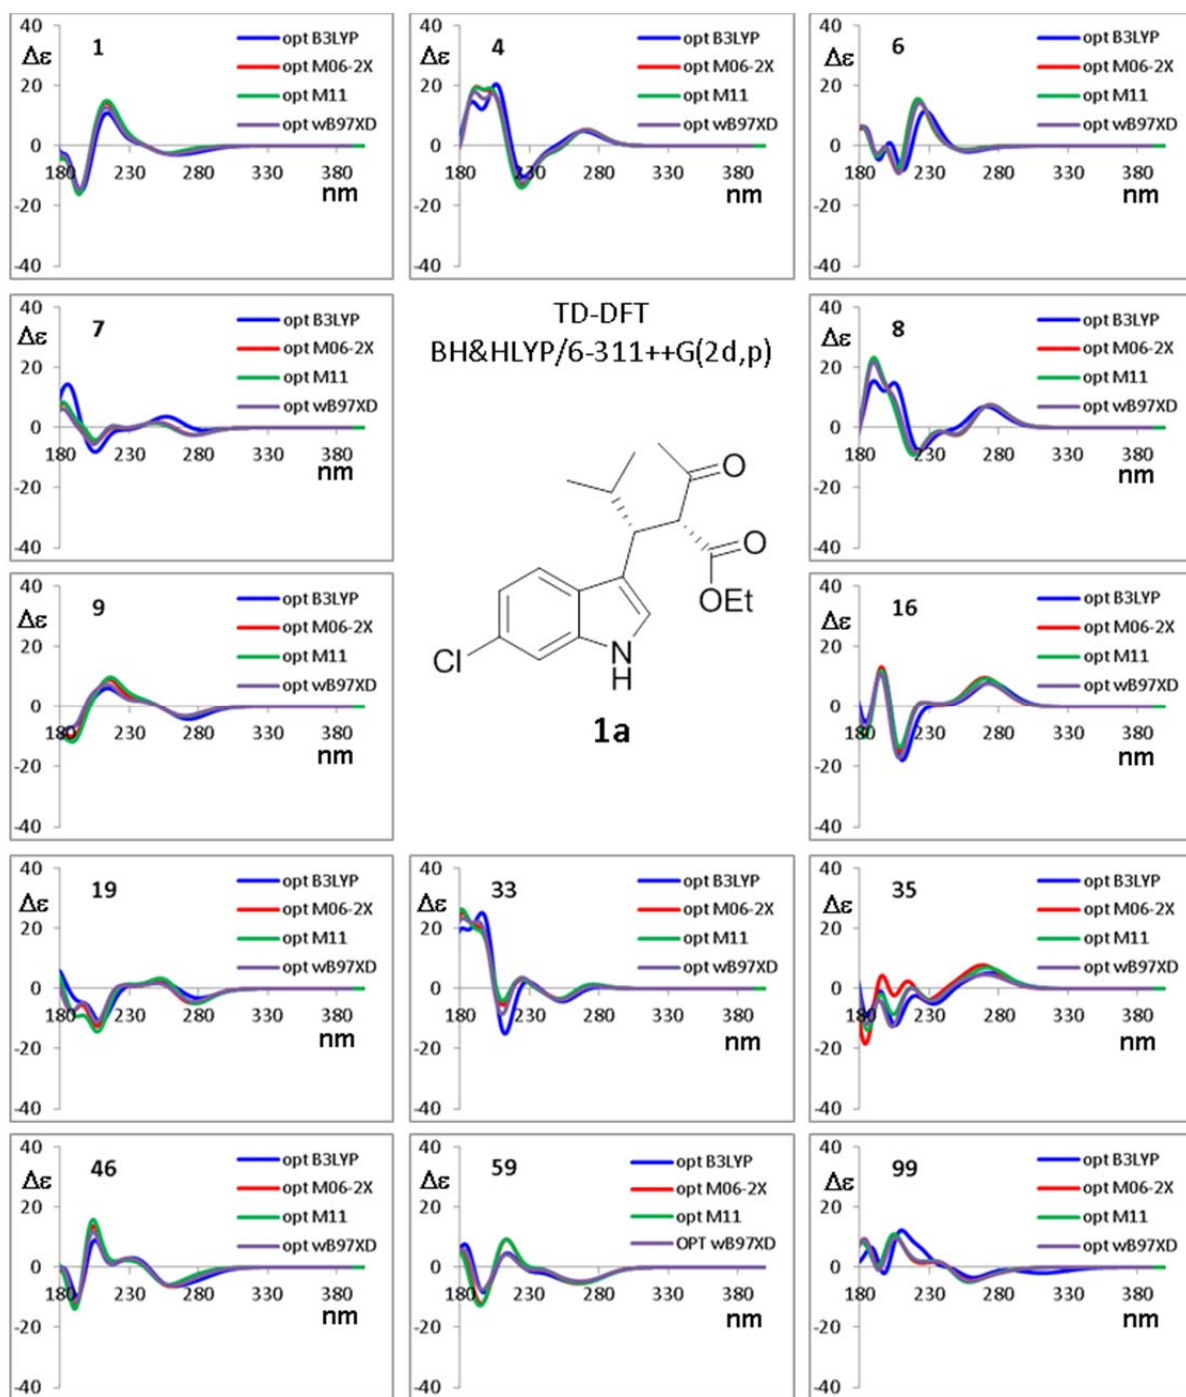

**Figure S11.** ECD simulation for the conformations of **1a**. The number in each quadrant is the conformation label; the four colored lines are the ECD spectra obtained by TD-DFT at the BH&HLYP/6-311++G(2d,p) level with the four different optimized geometries.

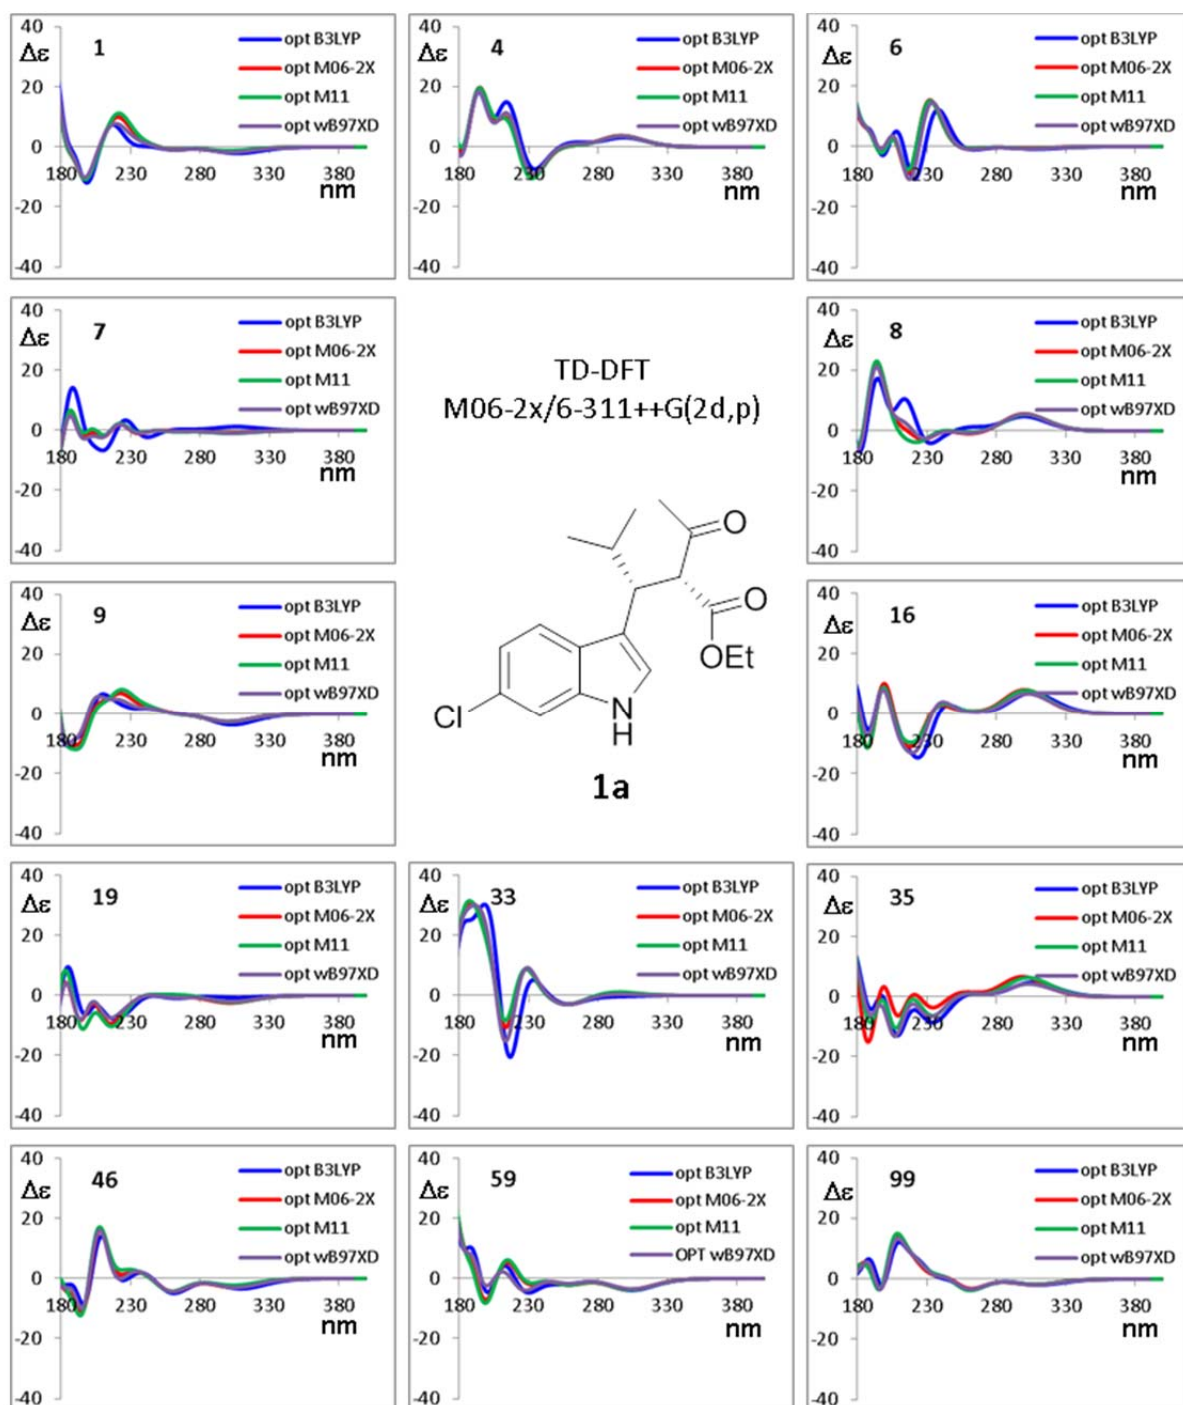

**Figure S12.** ECD simulation for the four conformations of **1a**. The number in each quadrant is the conformation label; the four colored lines are the ECD spectra obtained by TD-DFT at the M06-2x/6-311++G(2d,p) level with the four different optimized geometries..



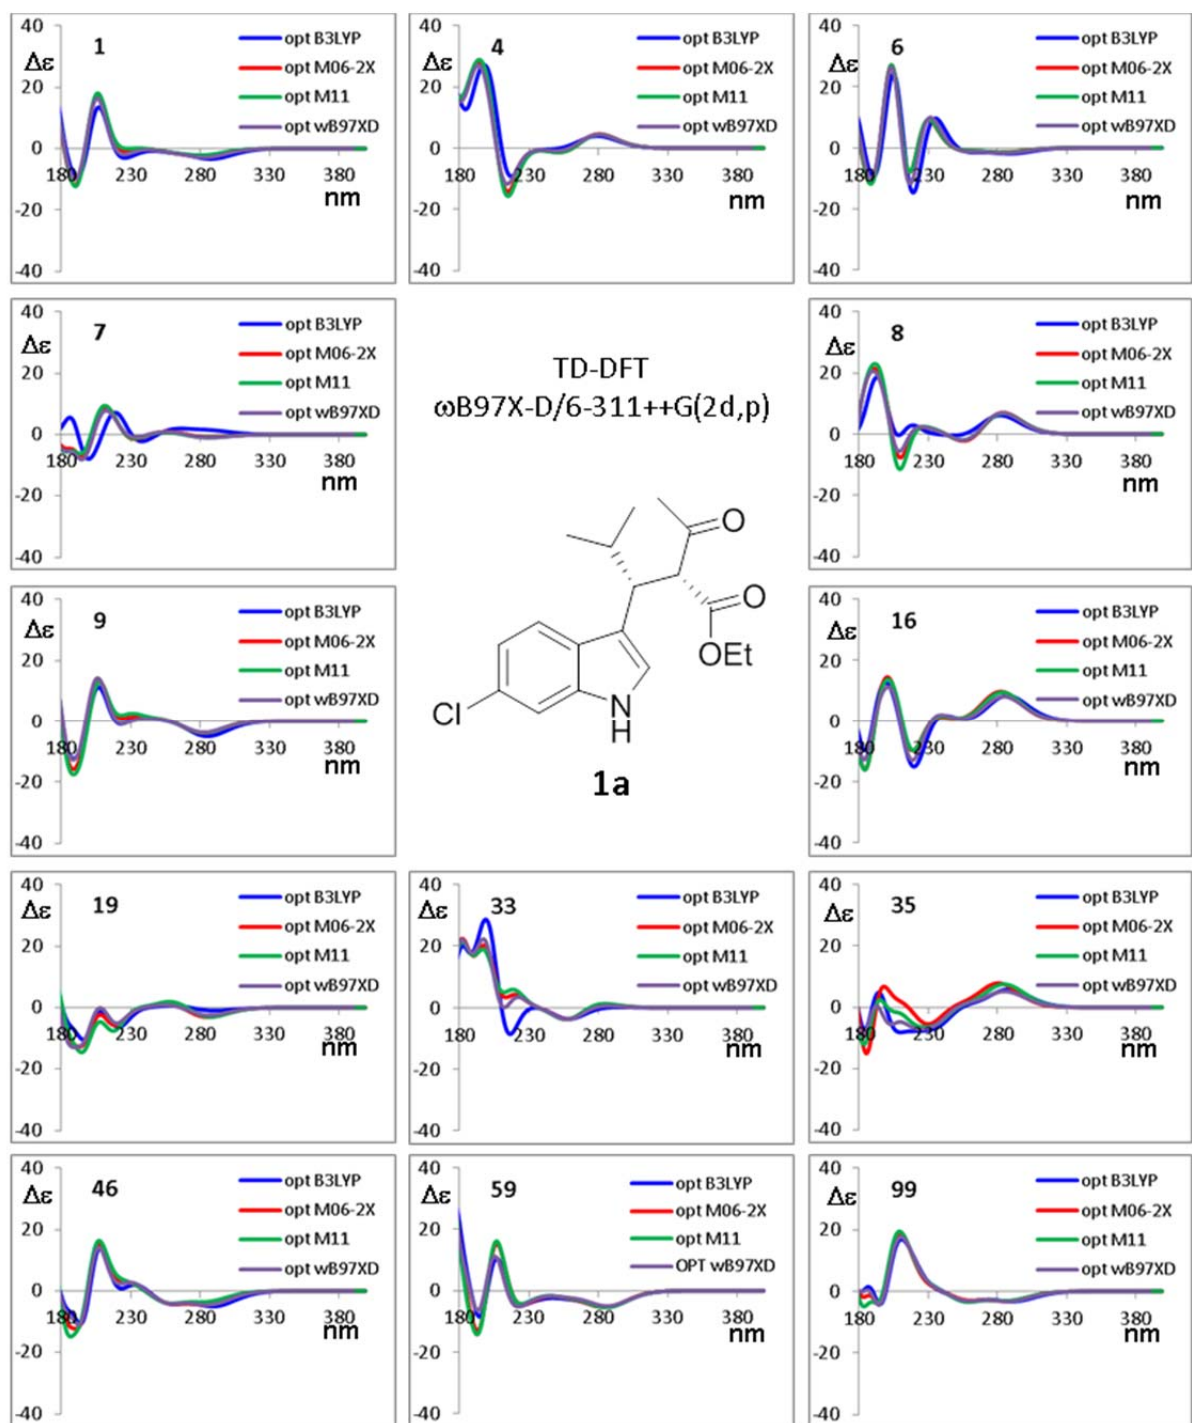

**Figure S13.** ECD simulation for the four conformations of **1a**. The number in each quadrant is the conformation label; the four colored lines are the ECD spectra obtained by TD-DFT at the  $\omega$ B97X-D/6-311++G(2d,p) level with the four different optimized geometries.

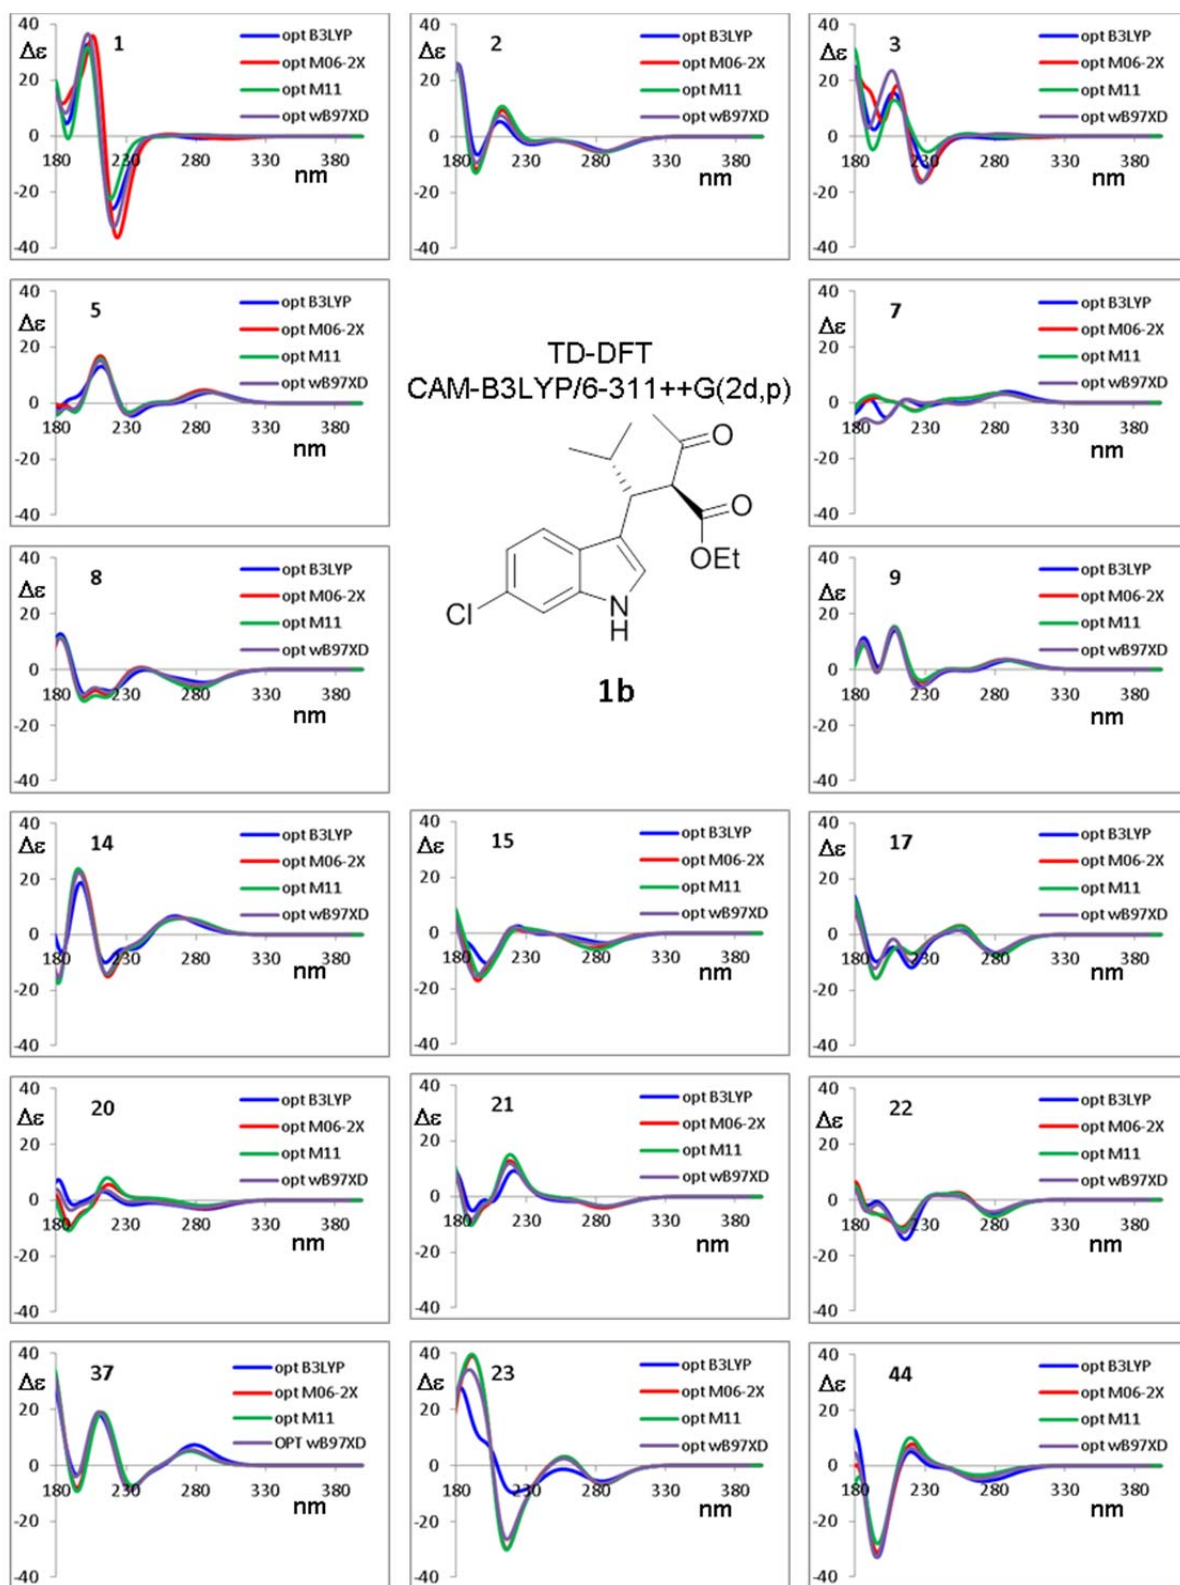

**Figure S14.** ECD simulation for the conformations of **1b**. The number in each quadrant is the conformation label; the four colored lines are the ECD spectra obtained by TD-DFT at the CAM-B3LYP/6-311++G(2d,p) level with the four different optimized geometries.

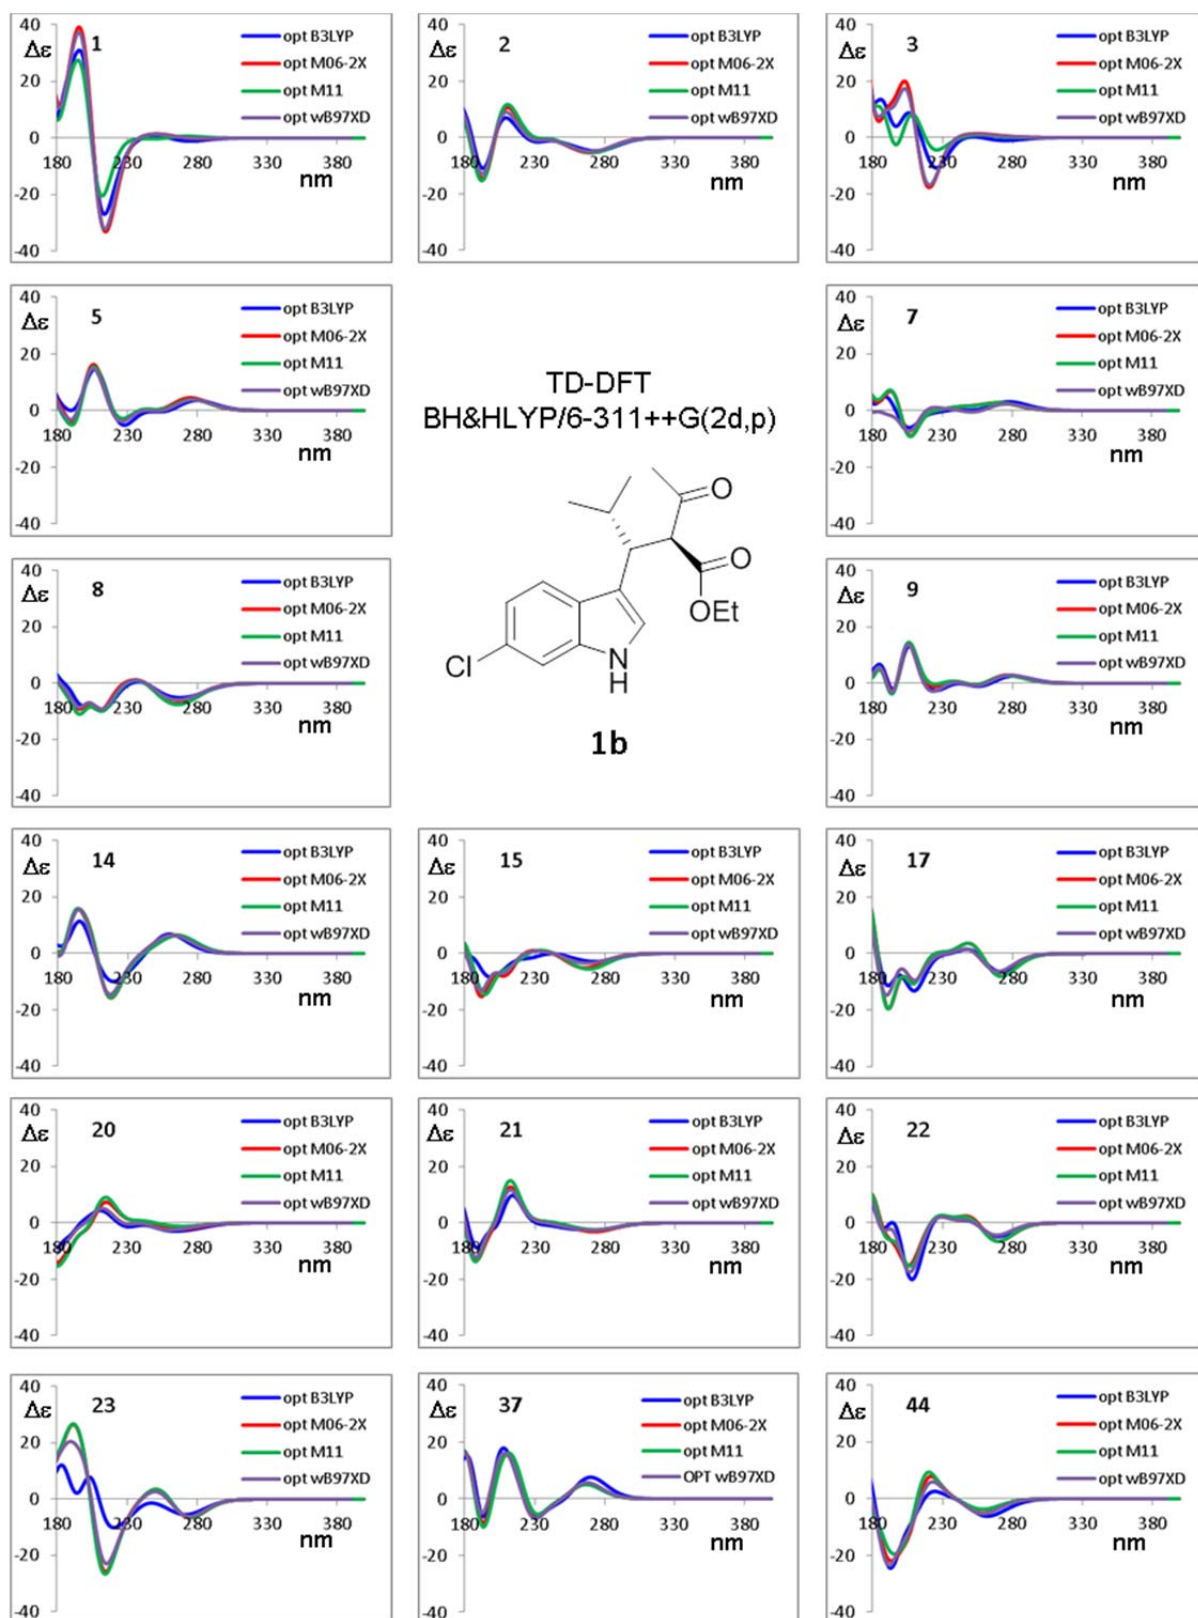

**Figure S15.** ECD simulation for the conformations of **1b**. The number in each quadrant is the conformation label; the four colored lines are the ECD spectra obtained by TD-DFT at the BH&HLYP/6-311++G(2d,p) level with the four different optimized geometries.

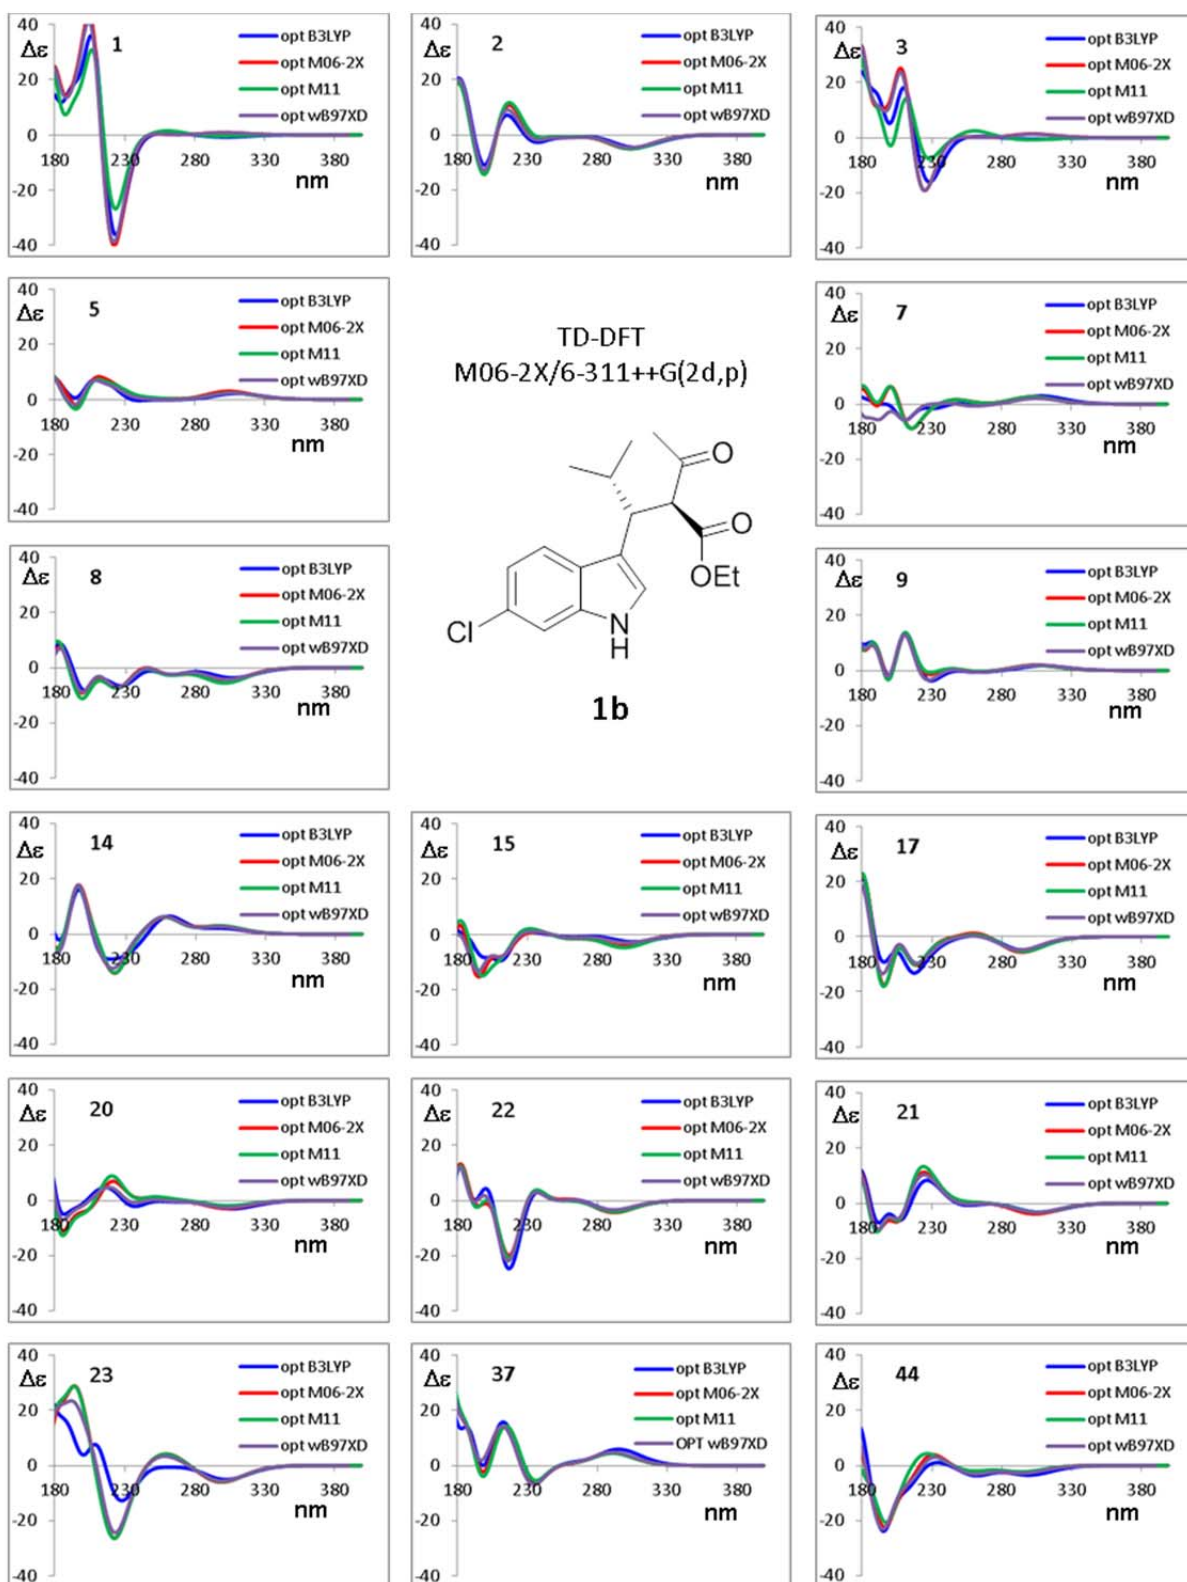

**Figure S16.** ECD simulation for the conformations of **1b**. The number in each quadrant is the conformation label; the four colored lines are the ECD spectra obtained by TD-DFT at the M06-2x/6-311++G(2d,p) level with the four different optimized geometries..

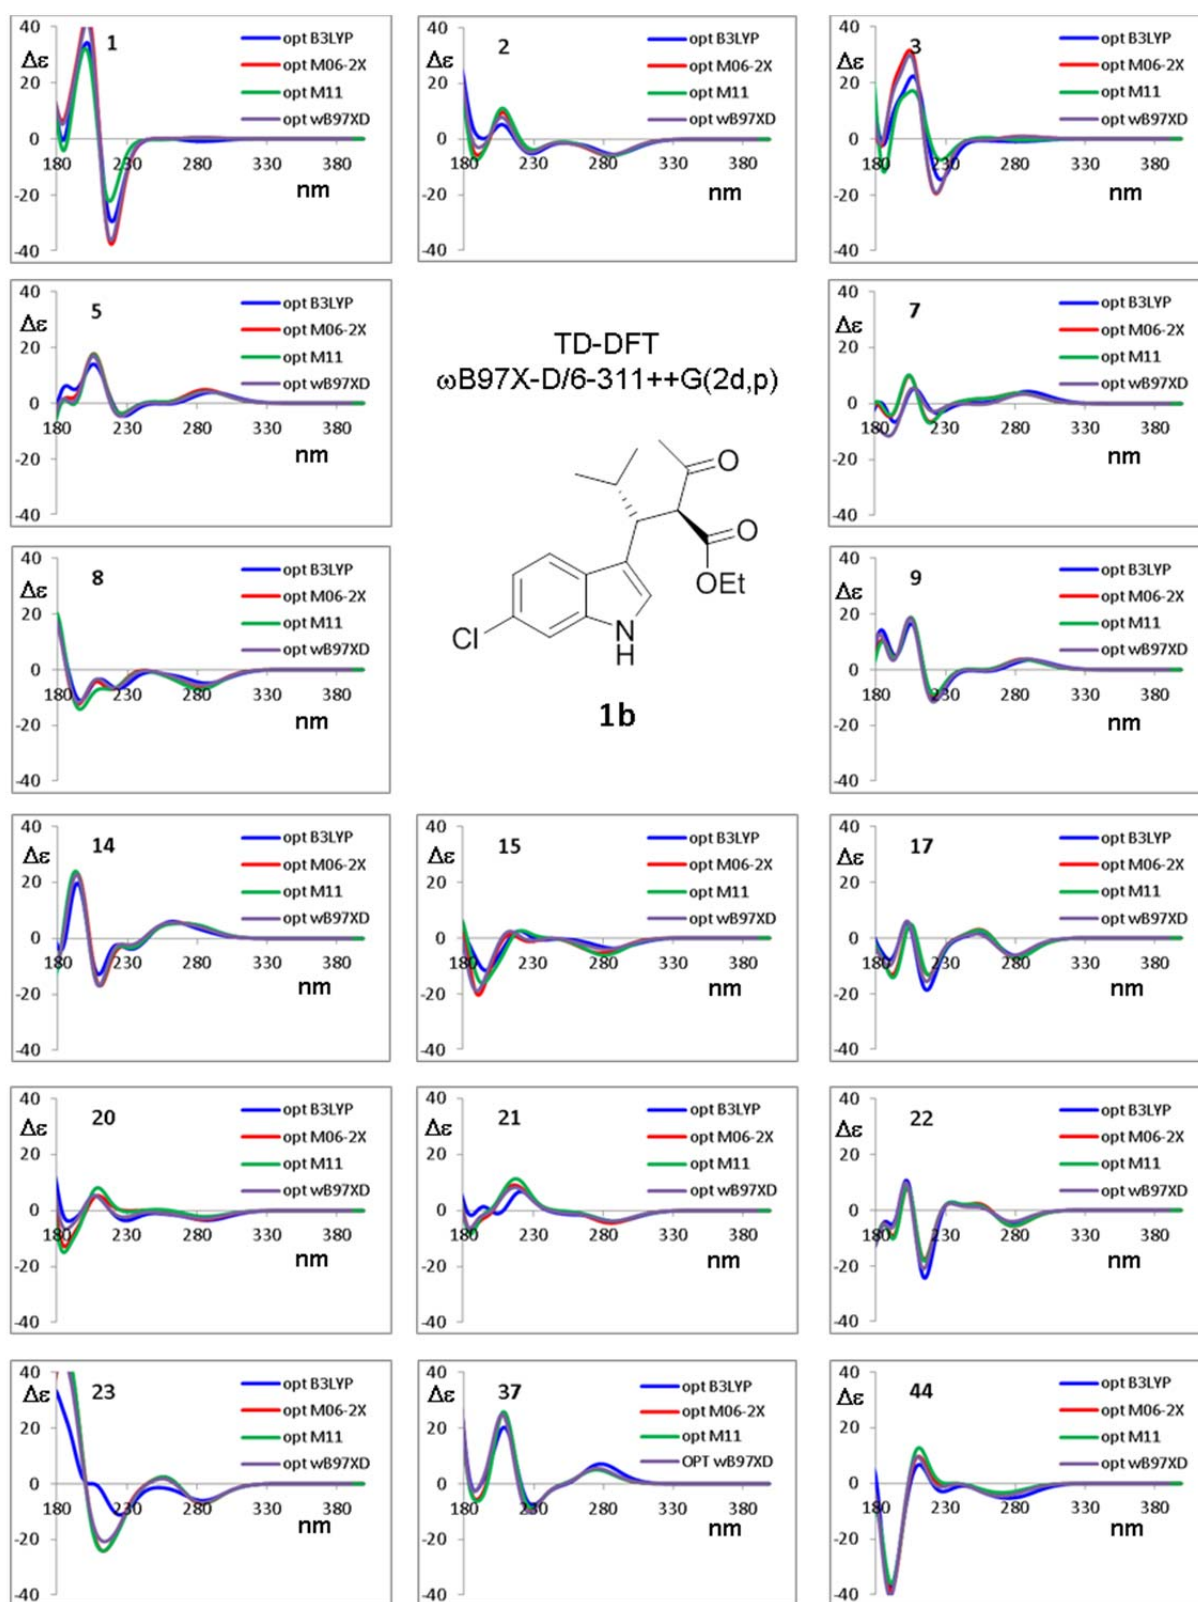

**Figure S17.** ECD simulation for the conformations of **1b**. The number in each quadrant is the conformation label; the four colored lines are the ECD spectra obtained by TD-DFT at the  $\omega$ B97X-D/6-311++G(2d,p) level with the four different optimized geometries..

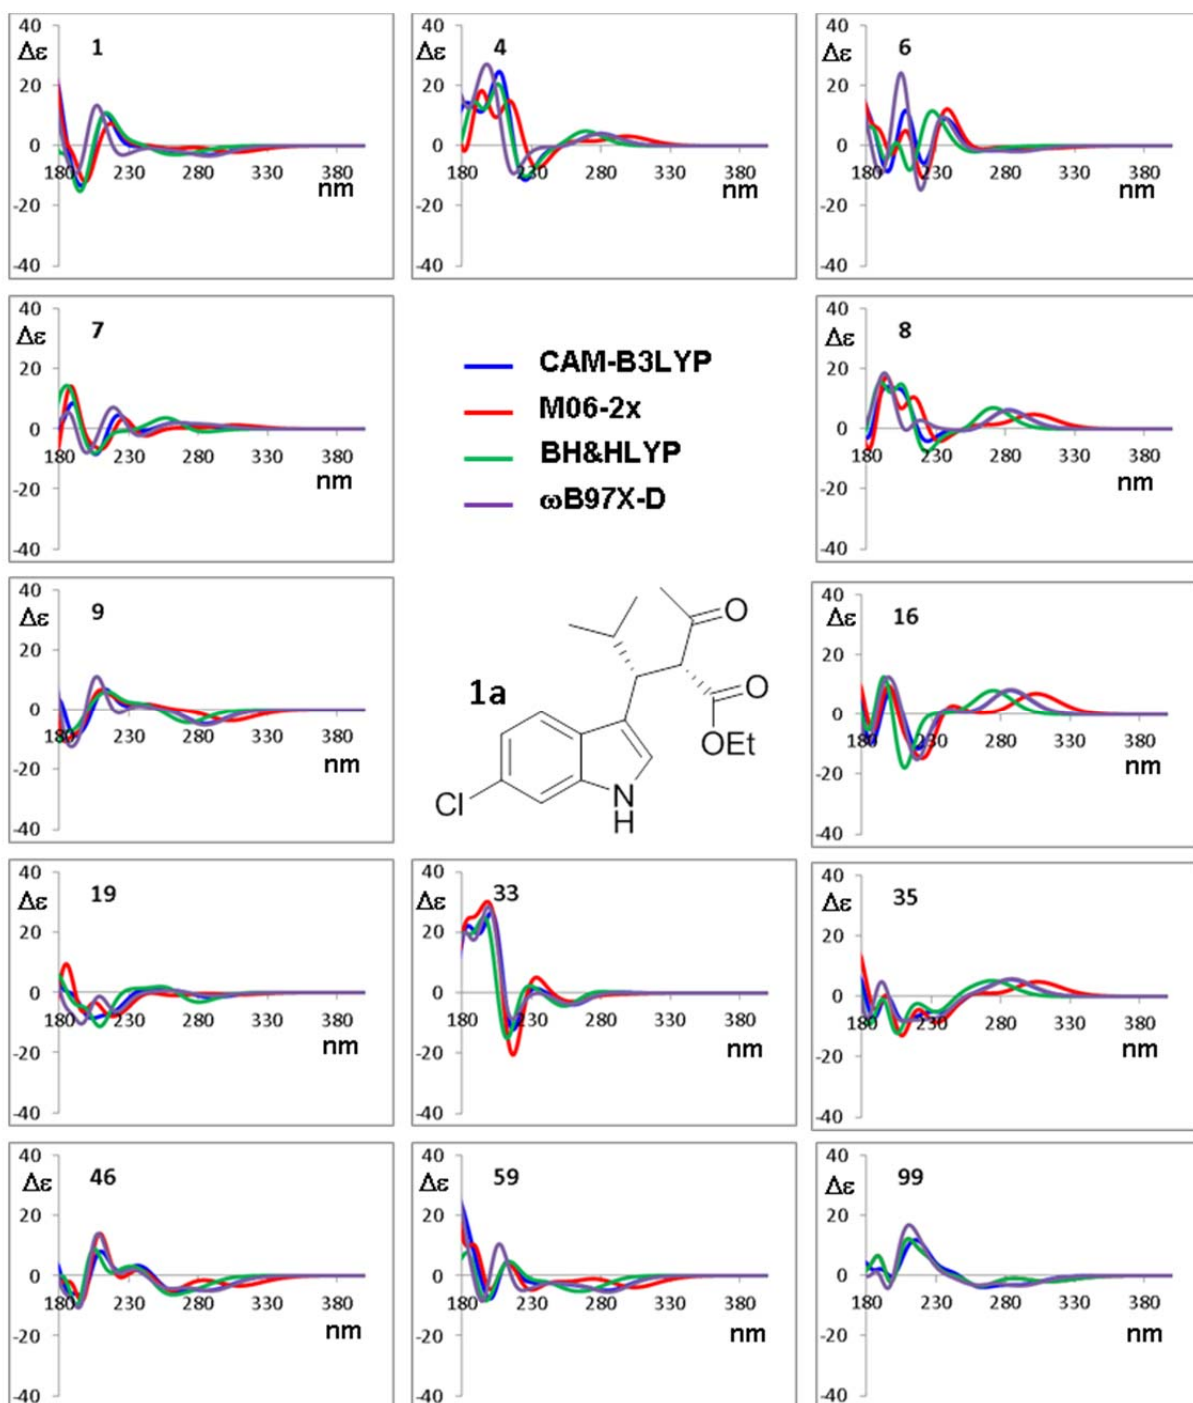

**Figure S18.** ECD simulation for the conformations of **1a**. The number in each quadrant indicates the conformation label; the four colored lines are the ECD spectra calculated with the four different functionals using the geometries obtained by PCM-B3LYP/6-311++G(2d,p).

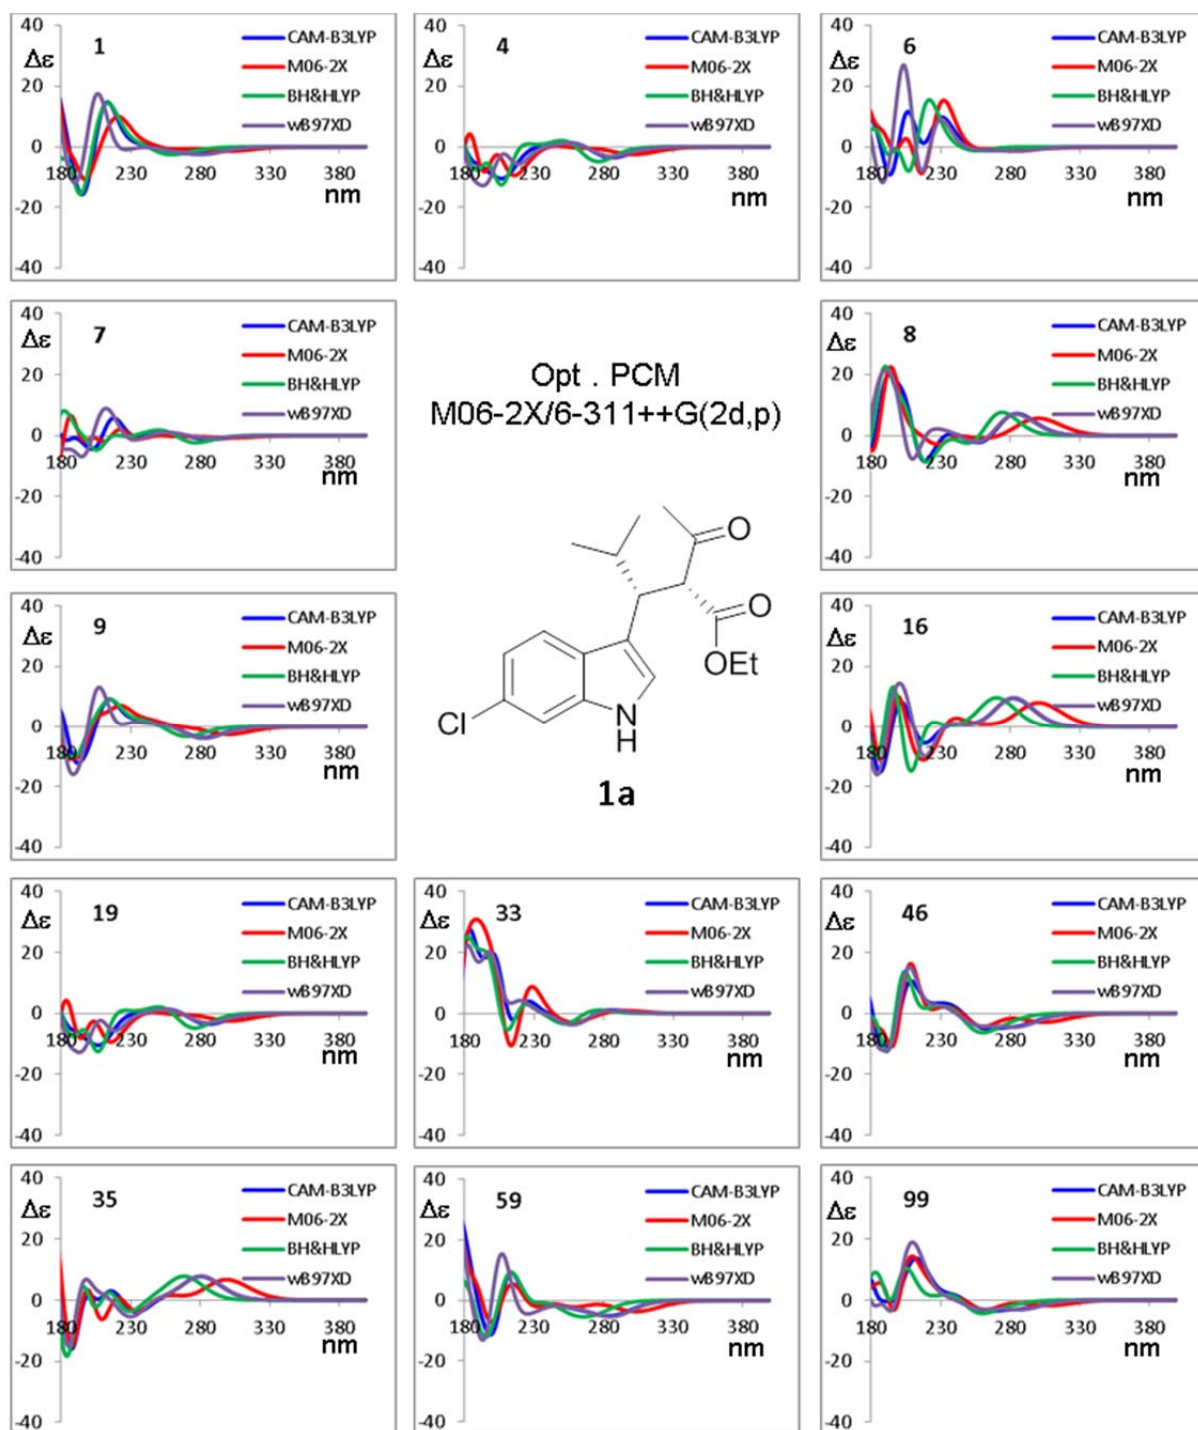

**Figure S19.** ECD simulation for the conformations of **1a**. The number in each quadrant indicates the conformation label; the four colored lines are the ECD spectra calculated with the four different functionals using the geometries obtained by PCM-M06-2x/6-311++G(2d,p).

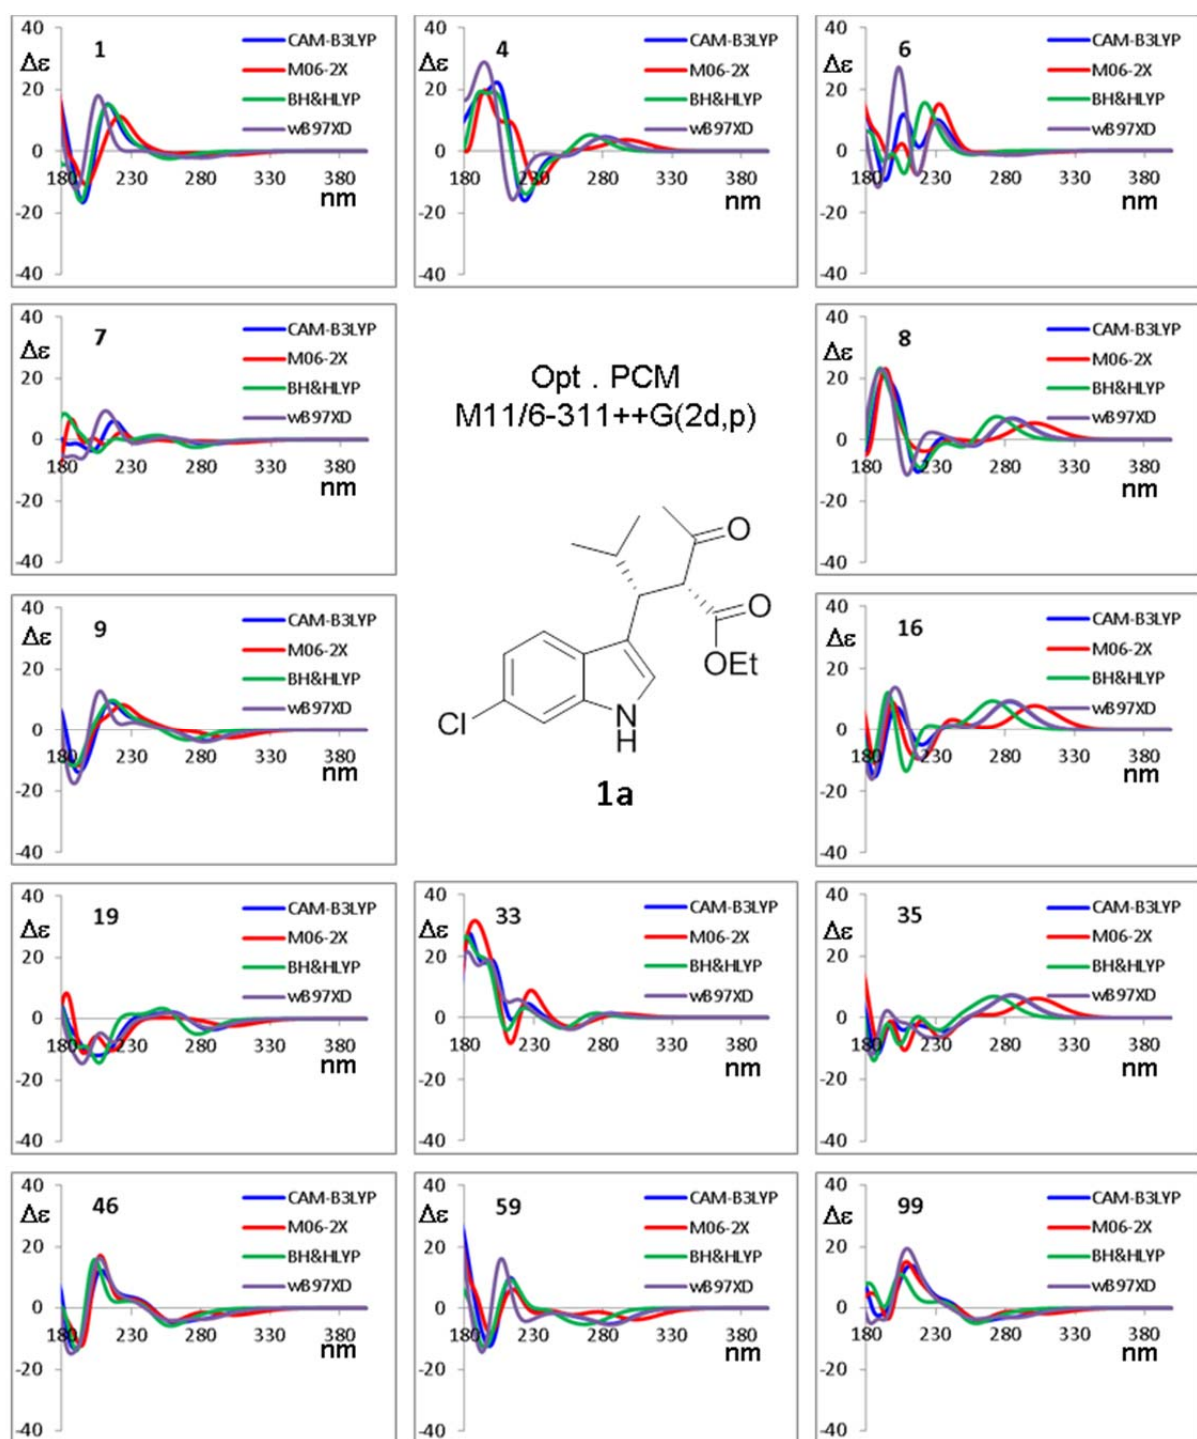

**Figure S20.** ECD simulation for the conformations of **1a**. The number in each quadrant indicates the conformation label; the four colored lines are the ECD spectra calculated with four different functionals using the geometries obtained by PCM-M11/6-311++G(2d,p).



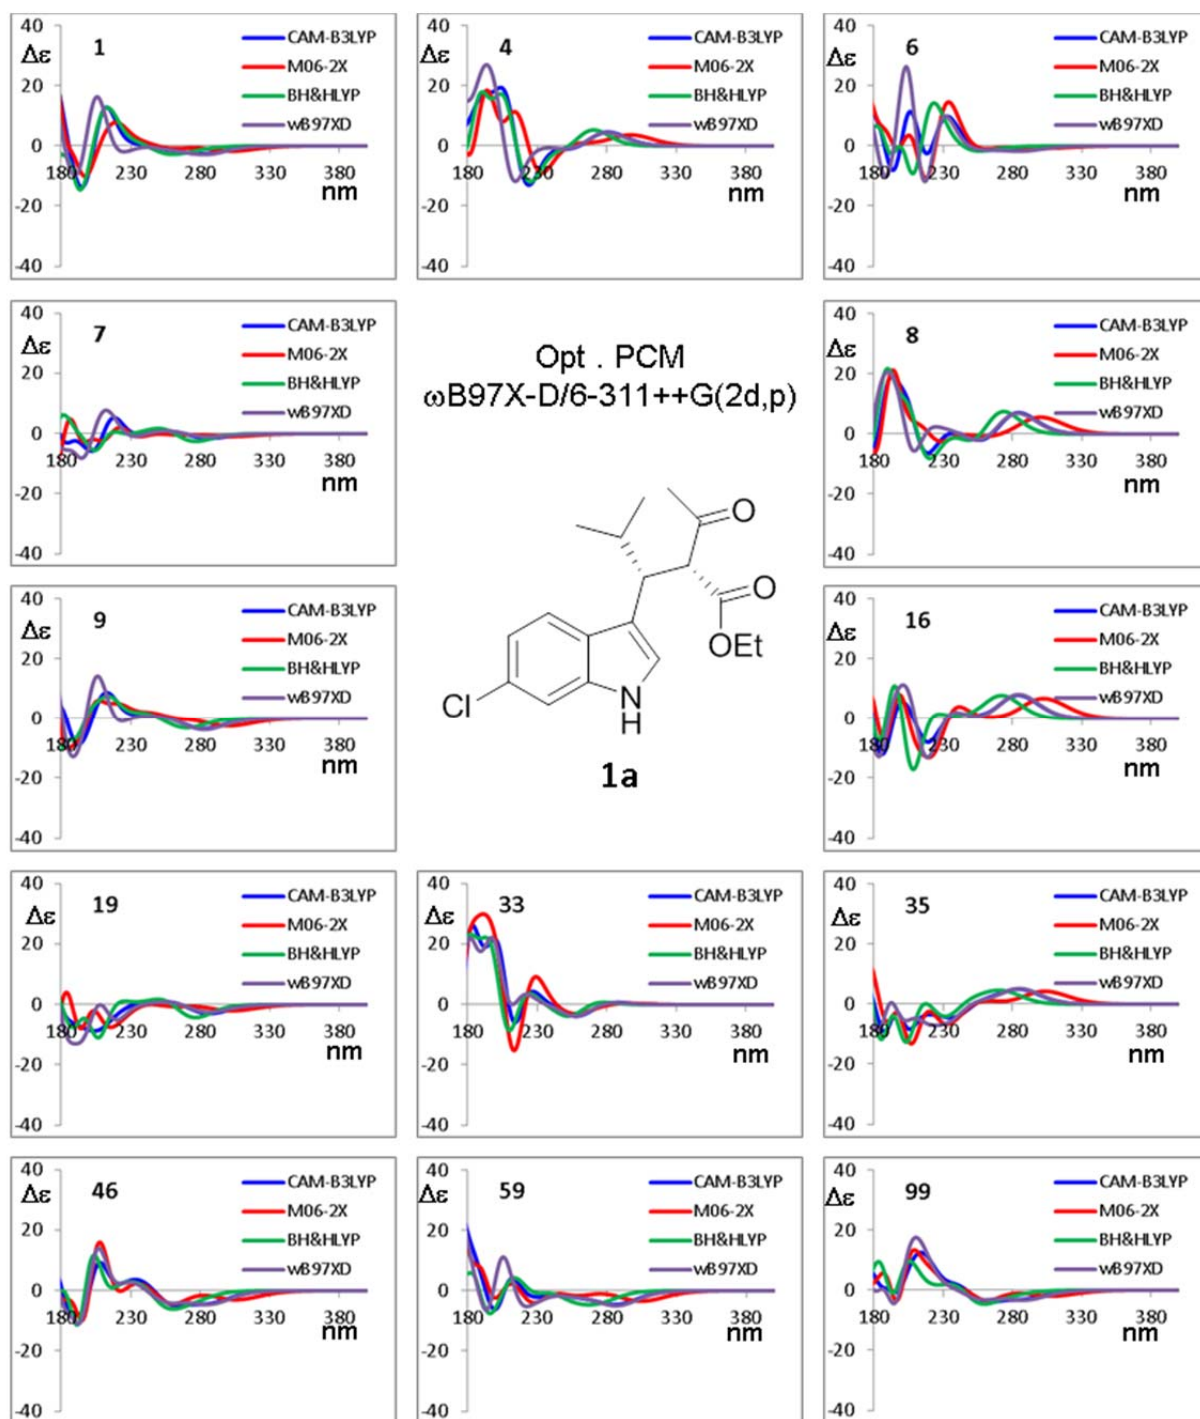

**Figure S21.** ECD simulation for the conformations of **1a**. The number in each quadrant indicates the conformation label; the four colored lines are the ECD spectra calculated with four different functionals using the geometries obtained by PCM- $\omega$ B97X-D/6-311++G(2d,p).

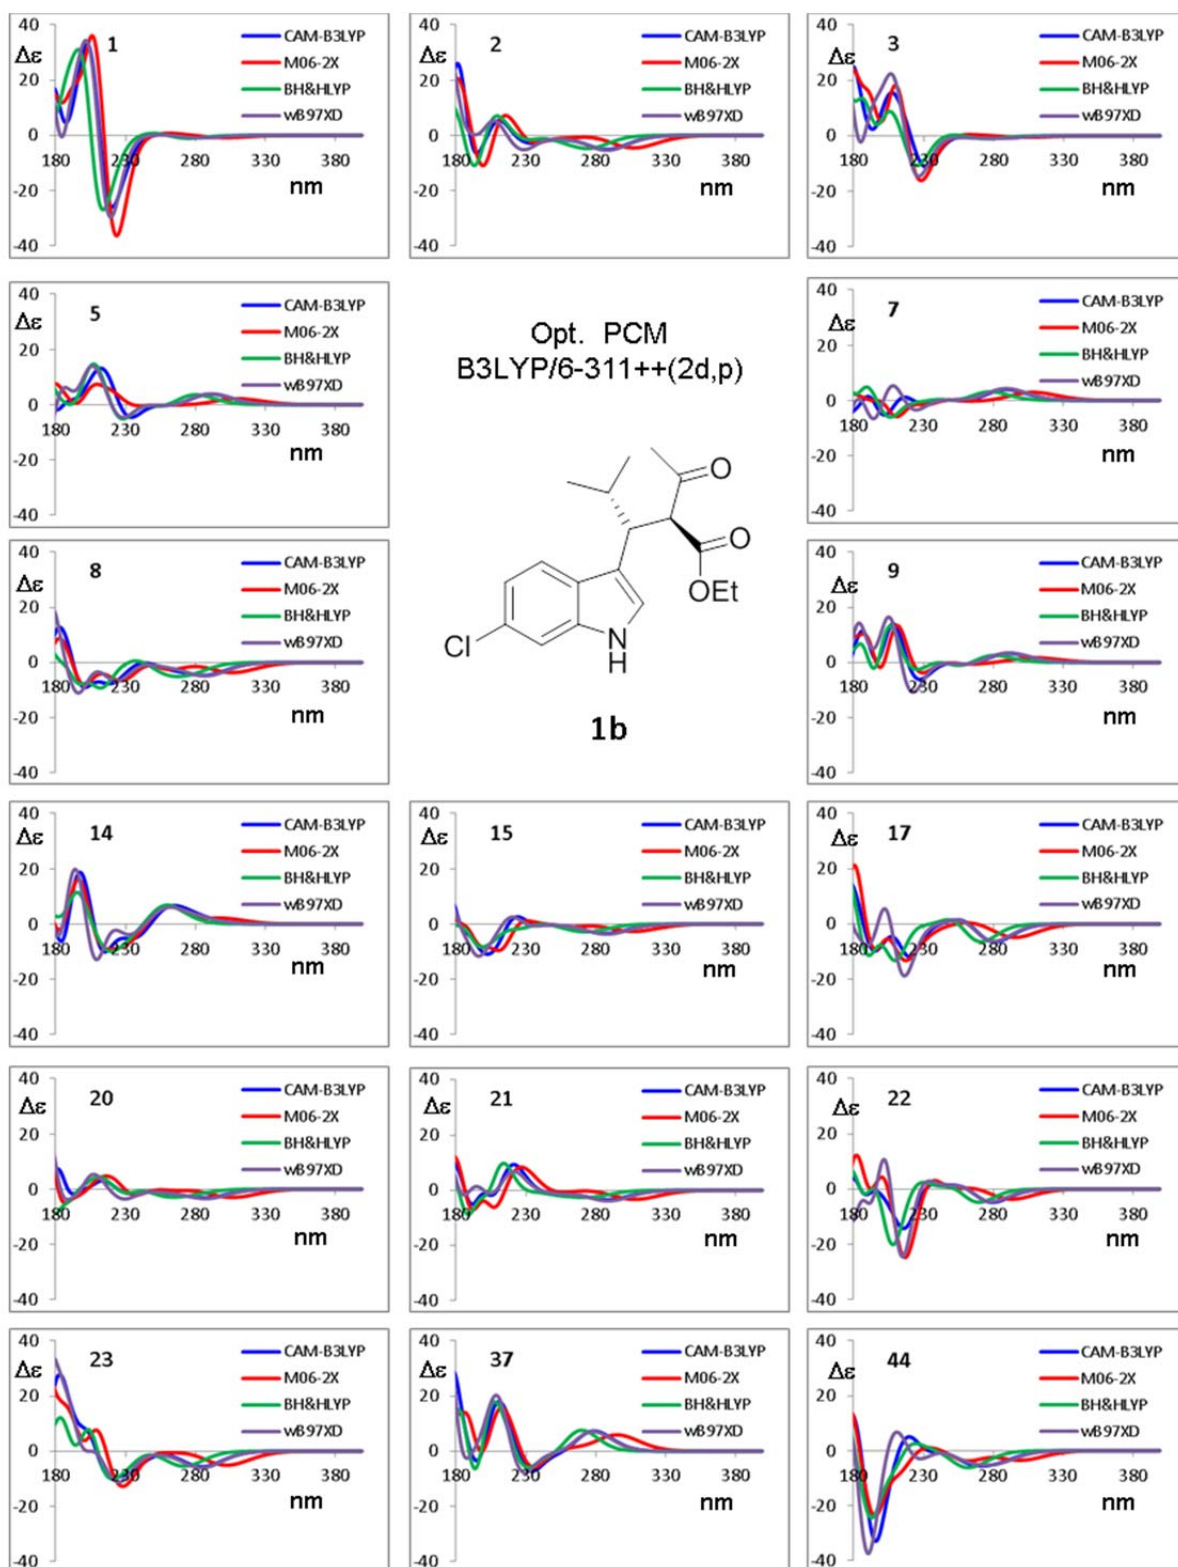

**Figure S22.** ECD simulation for the conformations of **1b**. The number in each quadrant indicates the conformation label; the four colored lines are the ECD spectra calculated with four different functionals using the geometries obtained by PCM-B3LYP/6-311++G(2d,p).

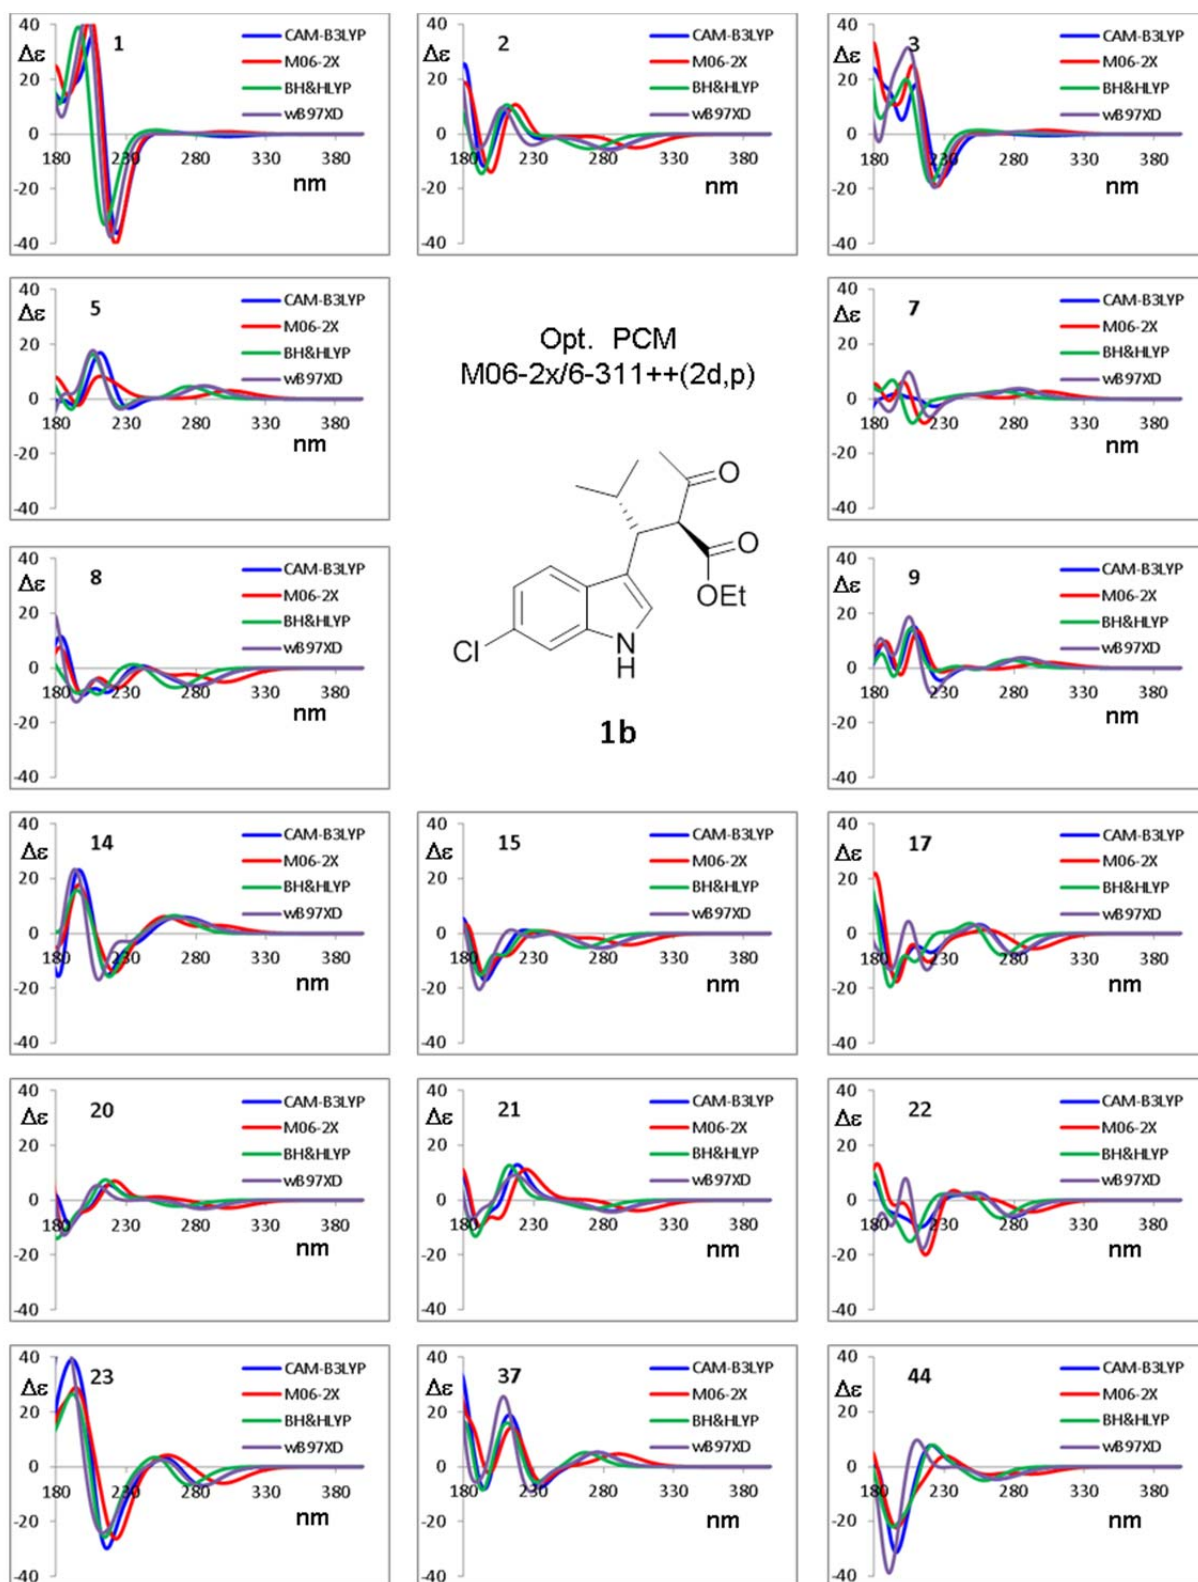

**Figure S23.** ECD simulation for the conformations of **1b**. The number in each quadrant indicates the conformation label; the four colored lines are the ECD spectra calculated with four different functionals using the geometries obtained by PCM-M06-2x/6-311++G(2d,p).

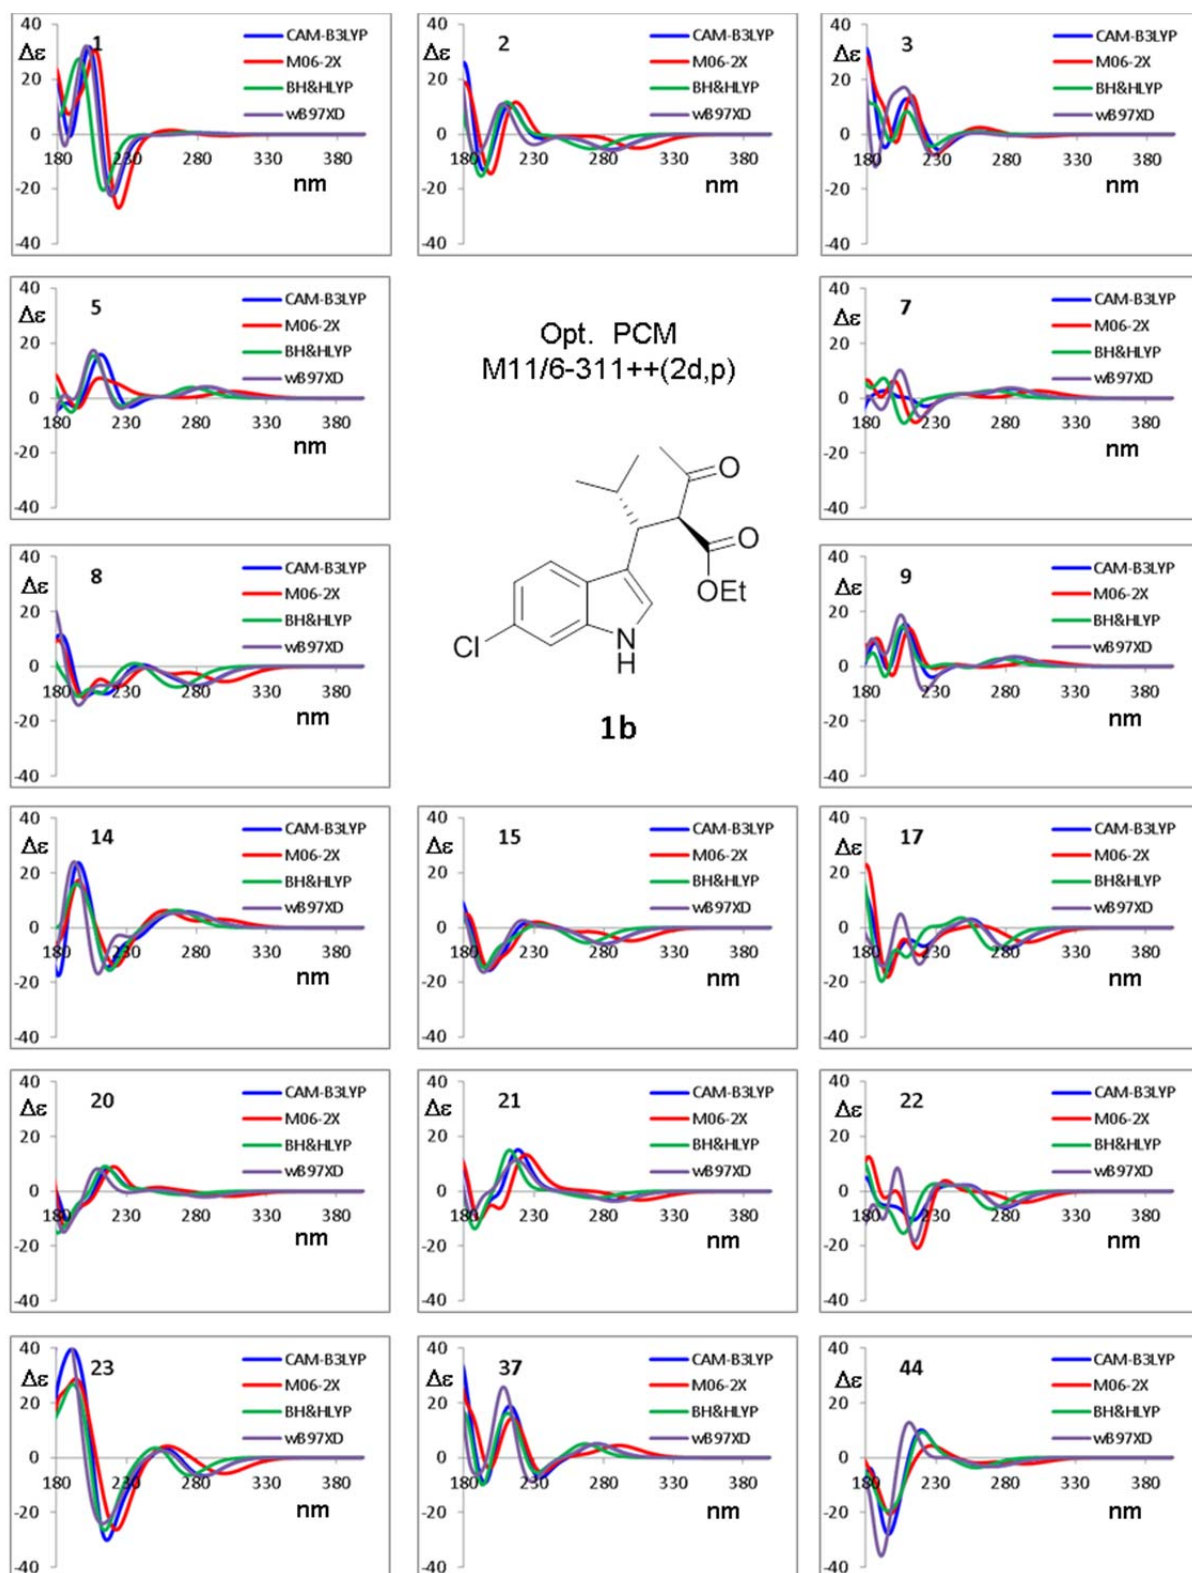

**Figure S24.** ECD simulation for the conformations of **1b**. The number in each quadrant indicates the conformation label; the four colored lines are the ECD spectra calculated by four different functionals using the geometries obtained by PCM-M11/6-311++G(2d,p).

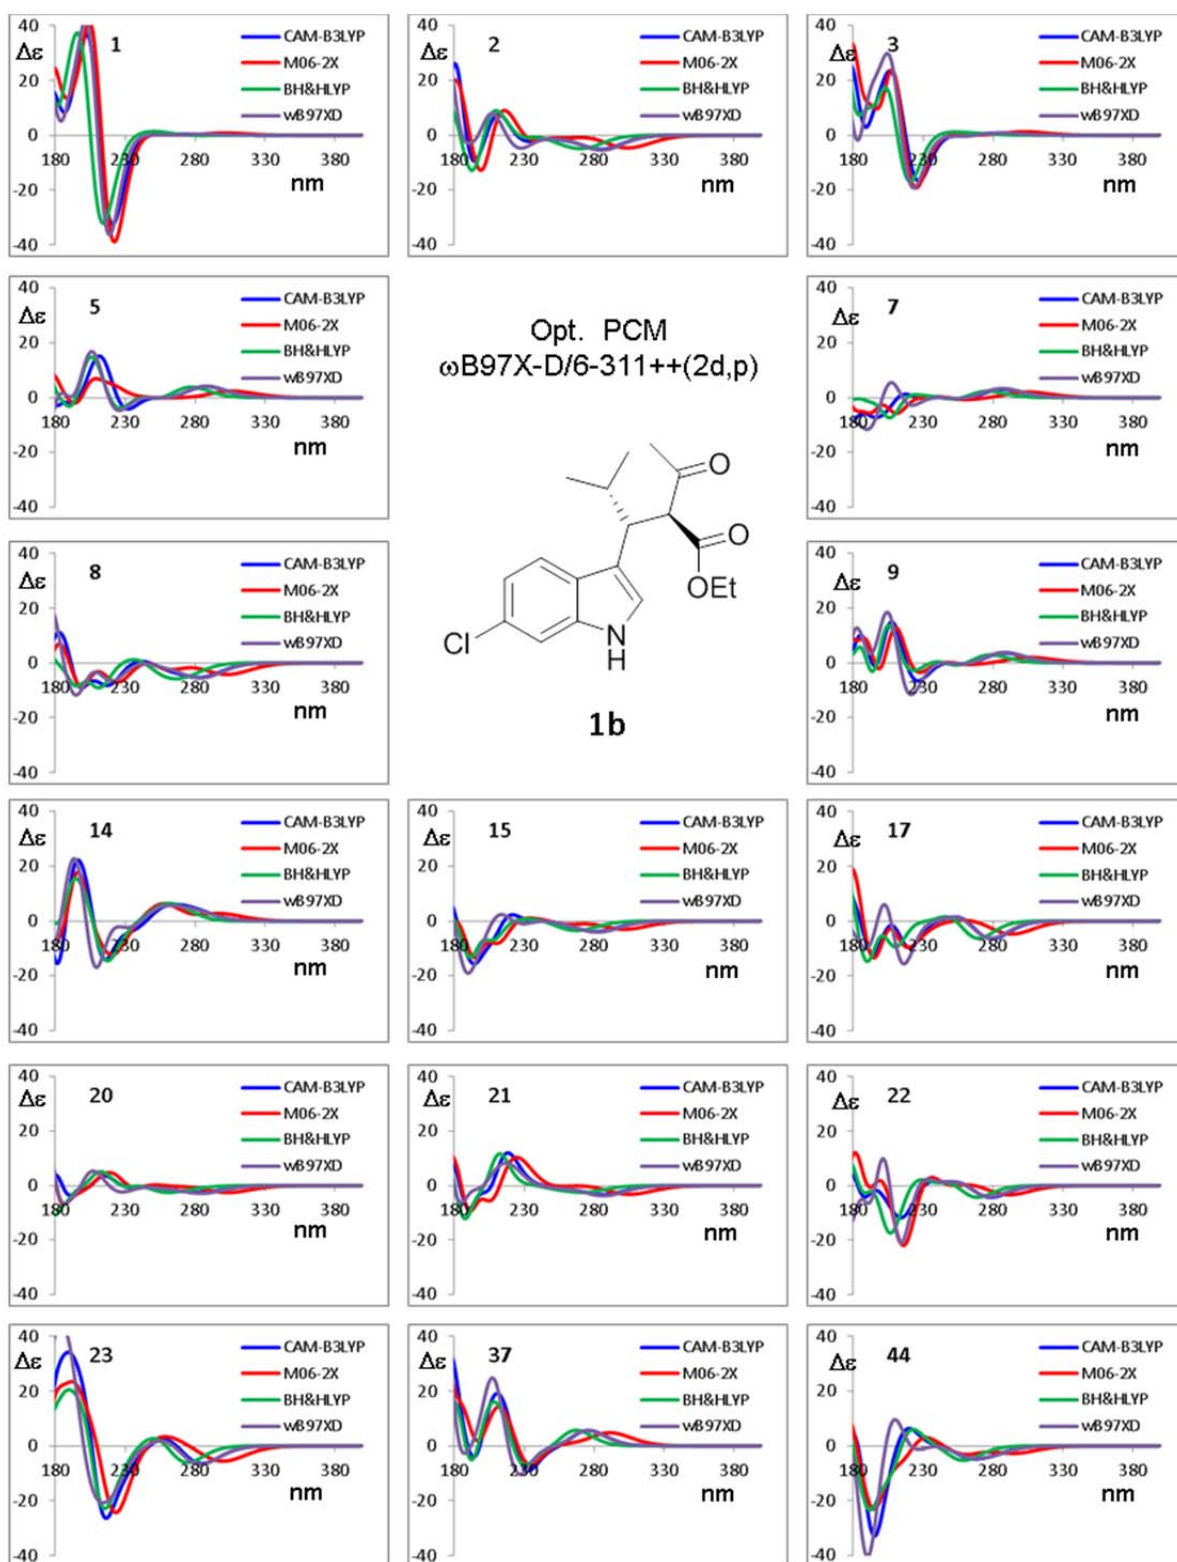

**Figure S25.** ECD simulation for the conformations of **1b**. The number in each quadrant indicates the conformation label; the four colored lines are the ECD spectra calculated by four different functionals using the geometries obtained by PCM- $\omega$ B97X-D/6-311++G(2d,p).

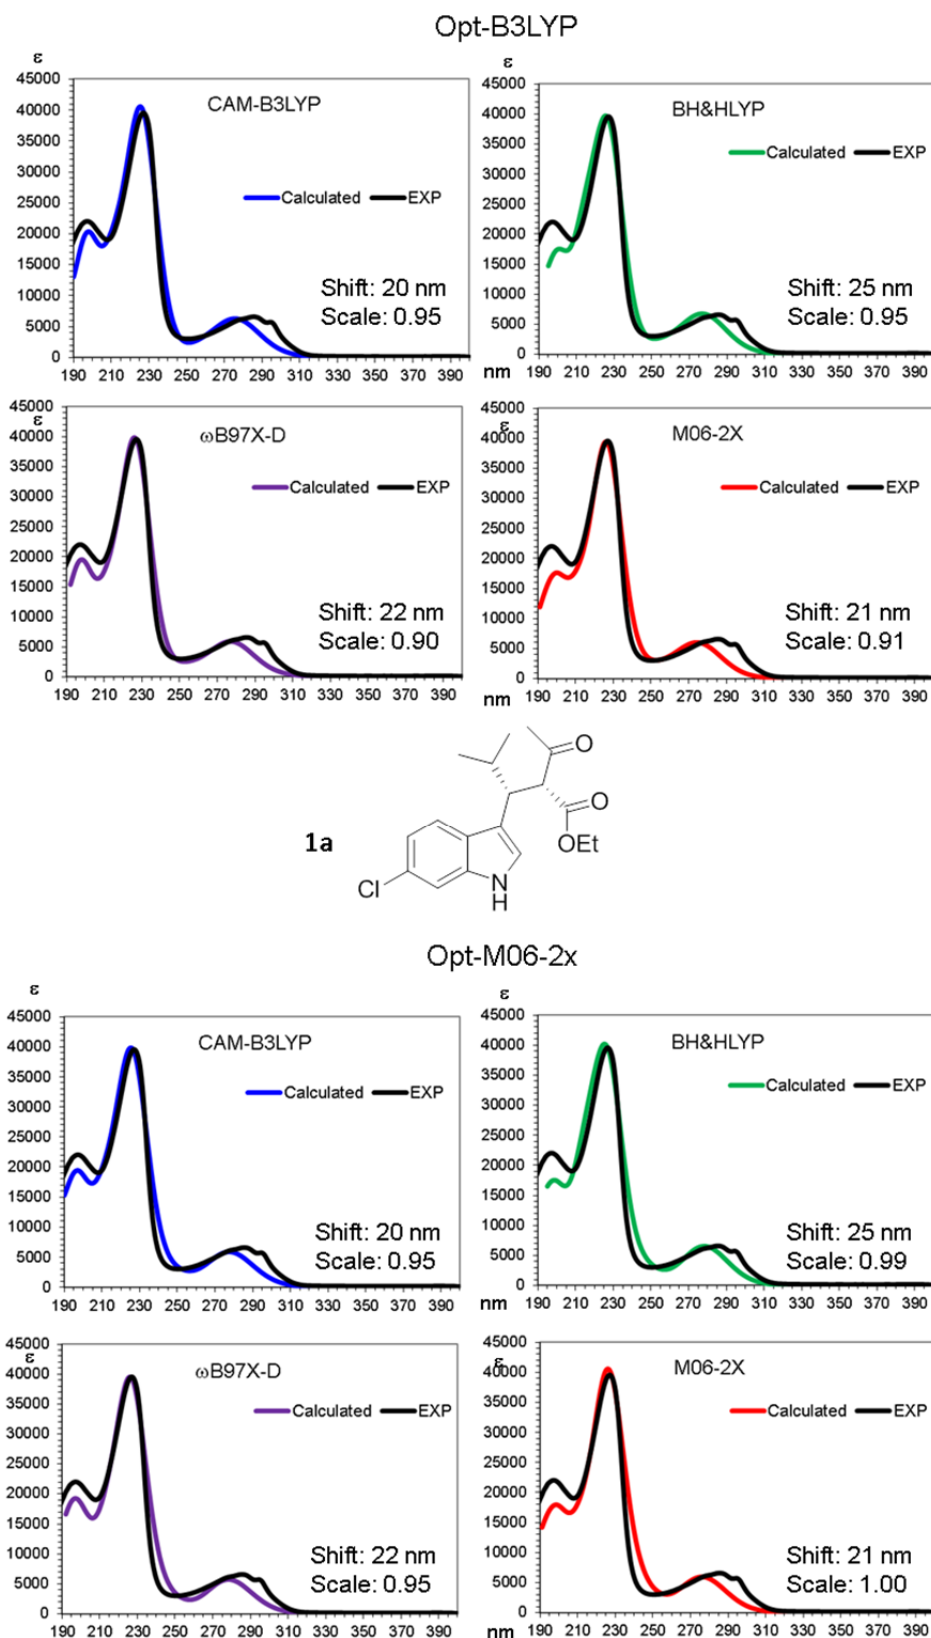

**Figure S26.** UV simulations for **1a** using the geometries obtained by the reported functional and the 6-311++G(2d,p) basis set. The simulated spectrum was obtained by using the conformational ratio derived from the energies of Table 4.

Opt- $\omega$ B97X-D

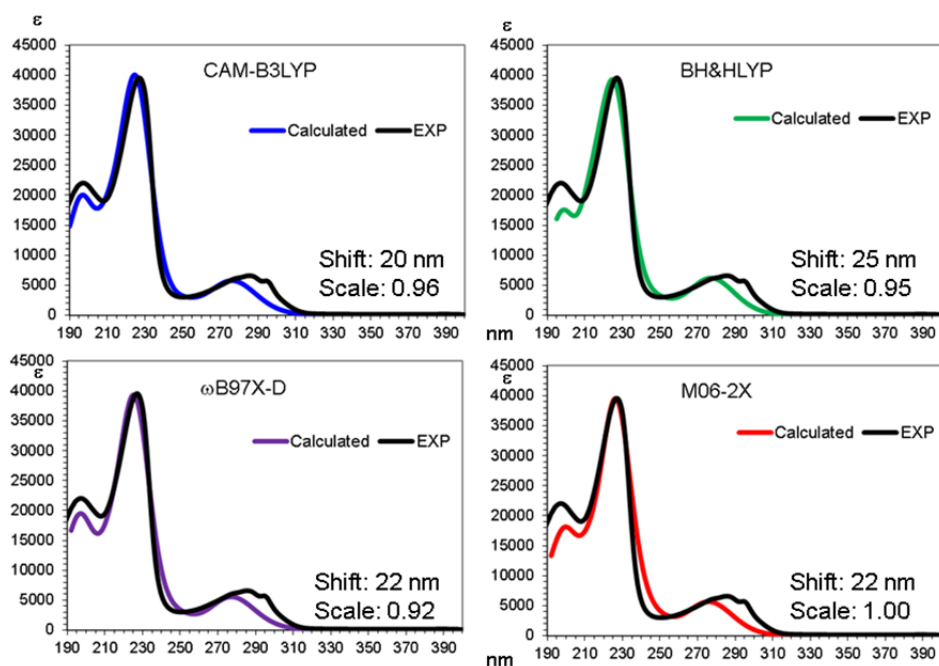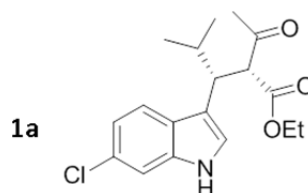

Opt-M11

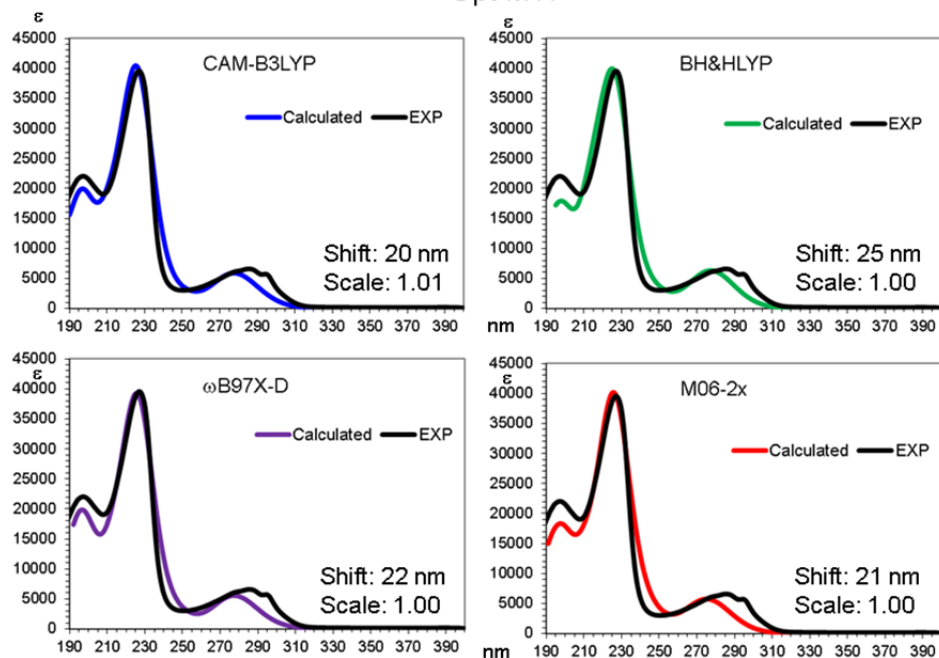

**Figure S27.** UV simulations for **1a** using the geometries obtained by the reported functional and the 6-311++G(2d,p) basis set. The simulated spectrum was obtained by using the conformational ratio derived from the energies of Table 4.

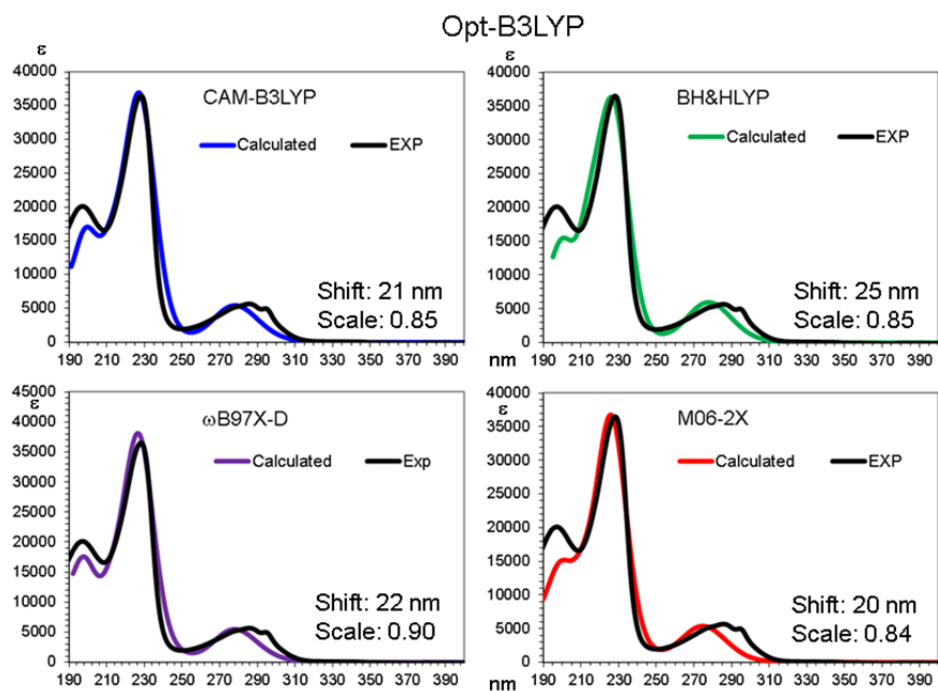

**1b**

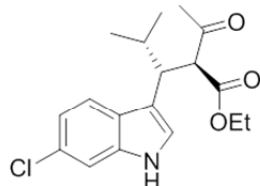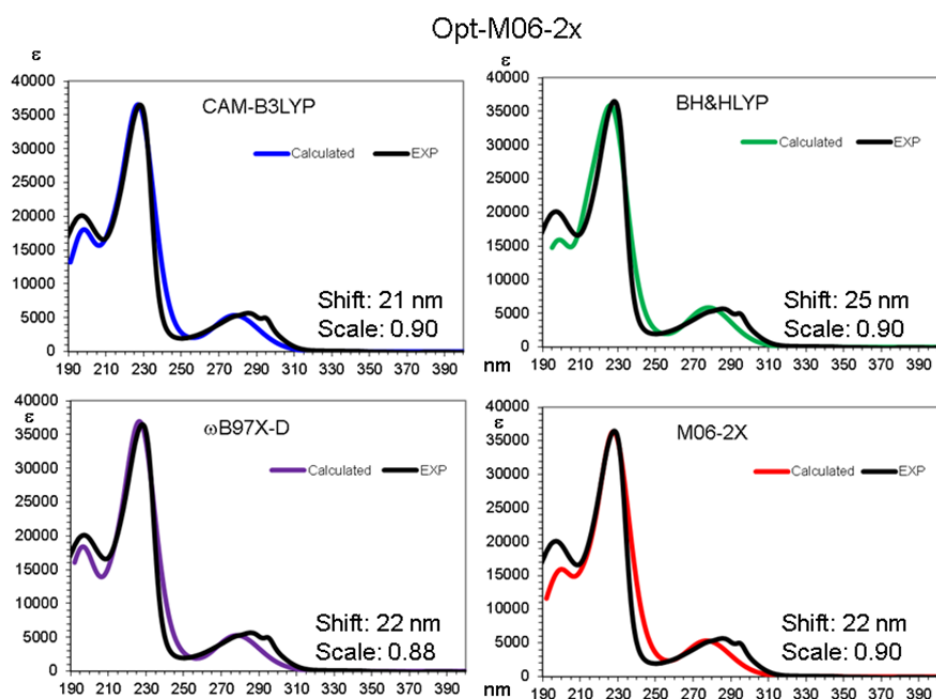

**Figure S28.** UV simulations for **1b** using the geometries obtained by the reported functional and the 6-311++G(2d,p) basis set. The simulated spectrum was obtained by using the conformational ratio derived from the energies of Table 4.



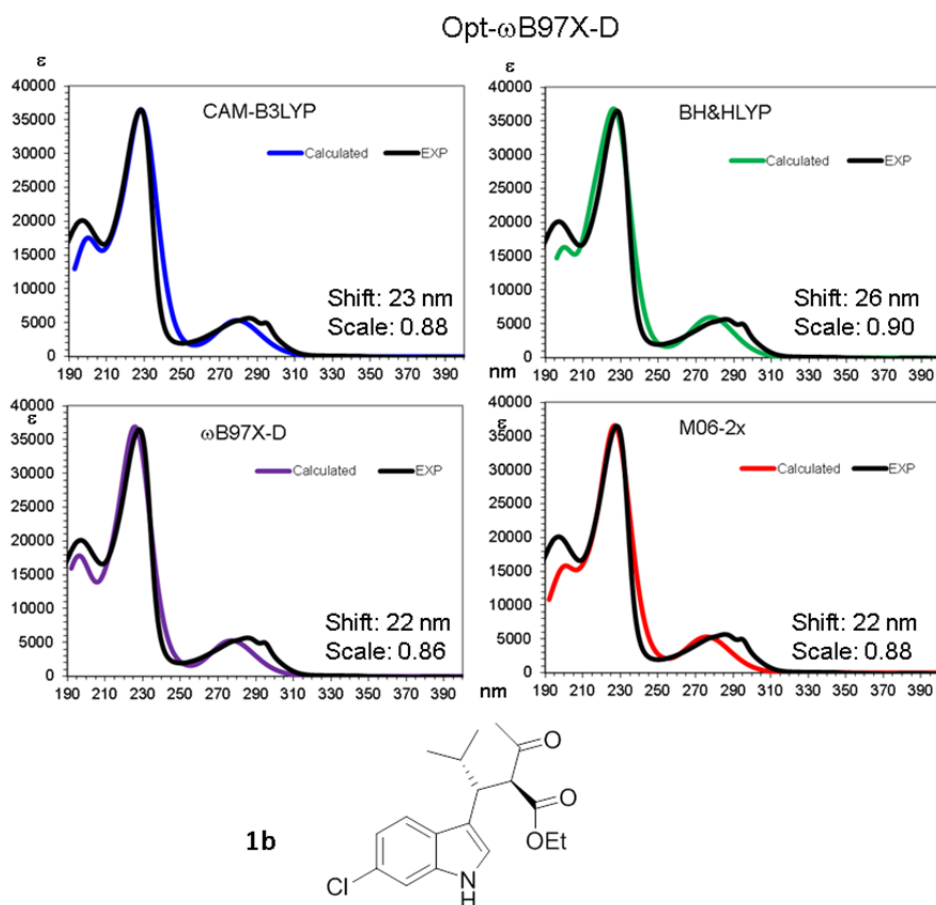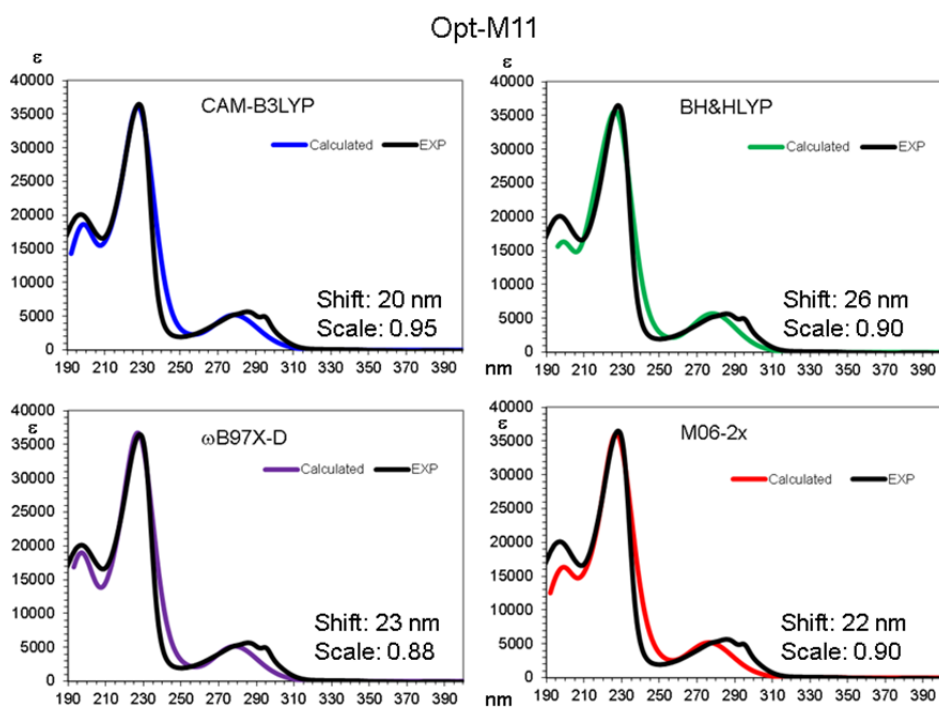

**Figure S29.** UV simulations for **1b** using the geometries obtained by the reported functional and the 6-311++G(2d,p) basis set. The simulated spectrum was obtained by using the conformational ratio derived from the energies of Table 4.

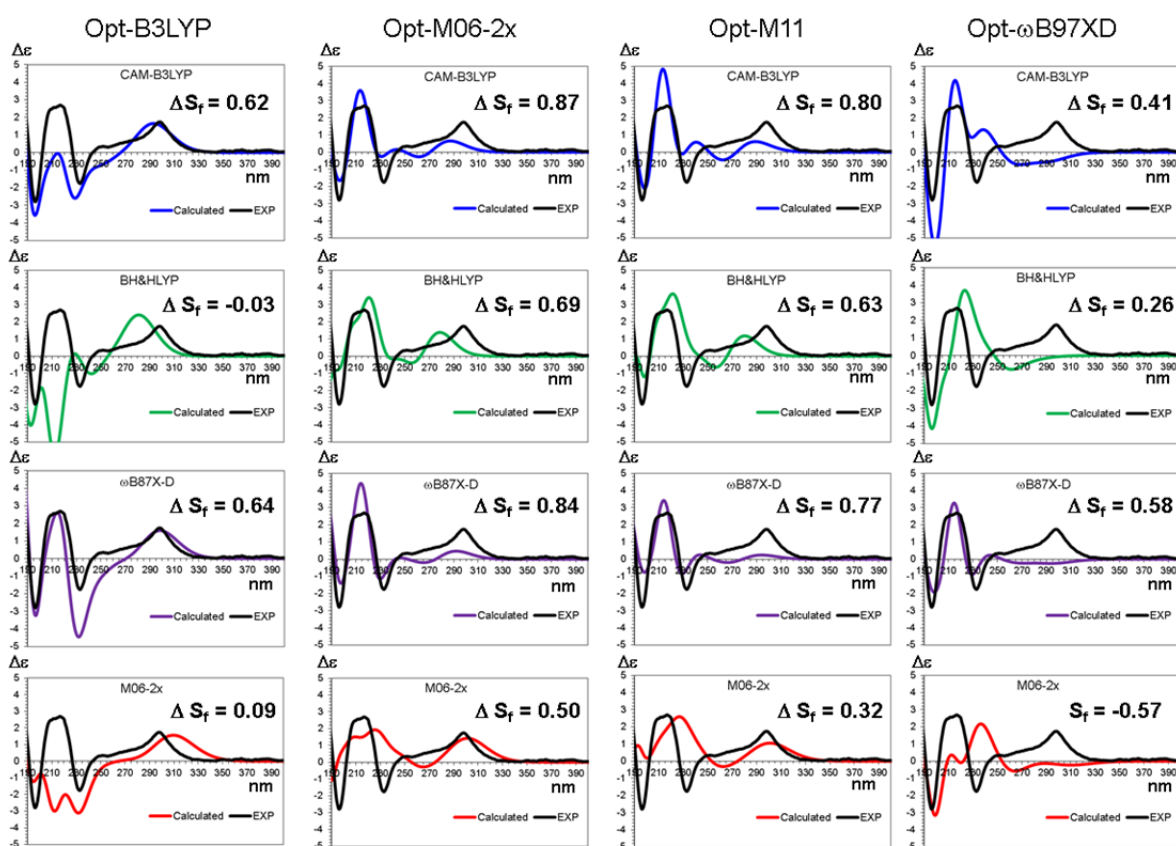

| Geometry Optimization Functional | TD-DFT Functional | Similarity Factor | Similarity factor Enant. | $\Delta S_f$ | Red shift (nm) | Scaling factor |
|----------------------------------|-------------------|-------------------|--------------------------|--------------|----------------|----------------|
| B3LYP                            | CAM-B3LYP         | 0.654             | 0.039                    | 0.62         | 6              | 0.65           |
| B3LYP                            | BH&HLYP           | 0.438             | 0.466                    | -0.03        | 6              | 0.95           |
| B3LYP                            | $\omega$ B97X-D   | 0.798             | 0.154                    | 0.64         | 11             | 0.62           |
| B3LYP                            | M06-2x            | 0.449             | 0.354                    | 0.09         | 4              | 0.65           |
| M06-2x                           | CAM-B3LYP         | 0.893             | 0.018                    | 0.87         | 5              | 0.45           |
| M06-2x                           | BH&HLYP           | 0.772             | 0.085                    | 0.69         | 6              | 0.78           |
| M06-2x                           | $\omega$ B97X-D   | 0.866             | 0.022                    | 0.84         | 11             | 0.35           |
| M06-2x                           | M06-2x            | 0.699             | 0.200                    | 0.50         | 4              | 0.95           |
| M11                              | CAM-B3LYP         | 0.848             | 0.048                    | 0.80         | 5              | 0.54           |
| M11                              | BH&HLYP           | 0.749             | 0.124                    | 0.63         | 6              | 0.74           |
| M11                              | $\omega$ B97X-D   | 0.813             | 0.043                    | 0.77         | 11             | 0.25           |
| M11                              | M06-2x            | 0.601             | 0.285                    | 0.32         | 2              | 0.90           |
| $\omega$ B97X-D                  | CAM-B3LYP         | 0.701             | 0.290                    | 0.41         | 2              | 0.73           |
| $\omega$ B97X-D                  | BH&HLYP           | 0.495             | 0.239                    | 0.26         | 4              | 0.65           |
| $\omega$ B97X-D                  | $\omega$ B97X-D   | 0.753             | 0.172                    | 0.58         | 11             | 0.26           |
| $\omega$ B97X-D                  | M06-2x            | 0.061             | 0.634                    | -0.57        | 3              | 0.72           |

**Figure S30.** TD-DFT simulations (colored traces) of the experimental ECD spectrum (black trace) of **1a**. Simulated spectra were red-shifted and scaled to have the best match with the experimental spectrum, as from the table. Similarity factor were obtained with SpecDis software.

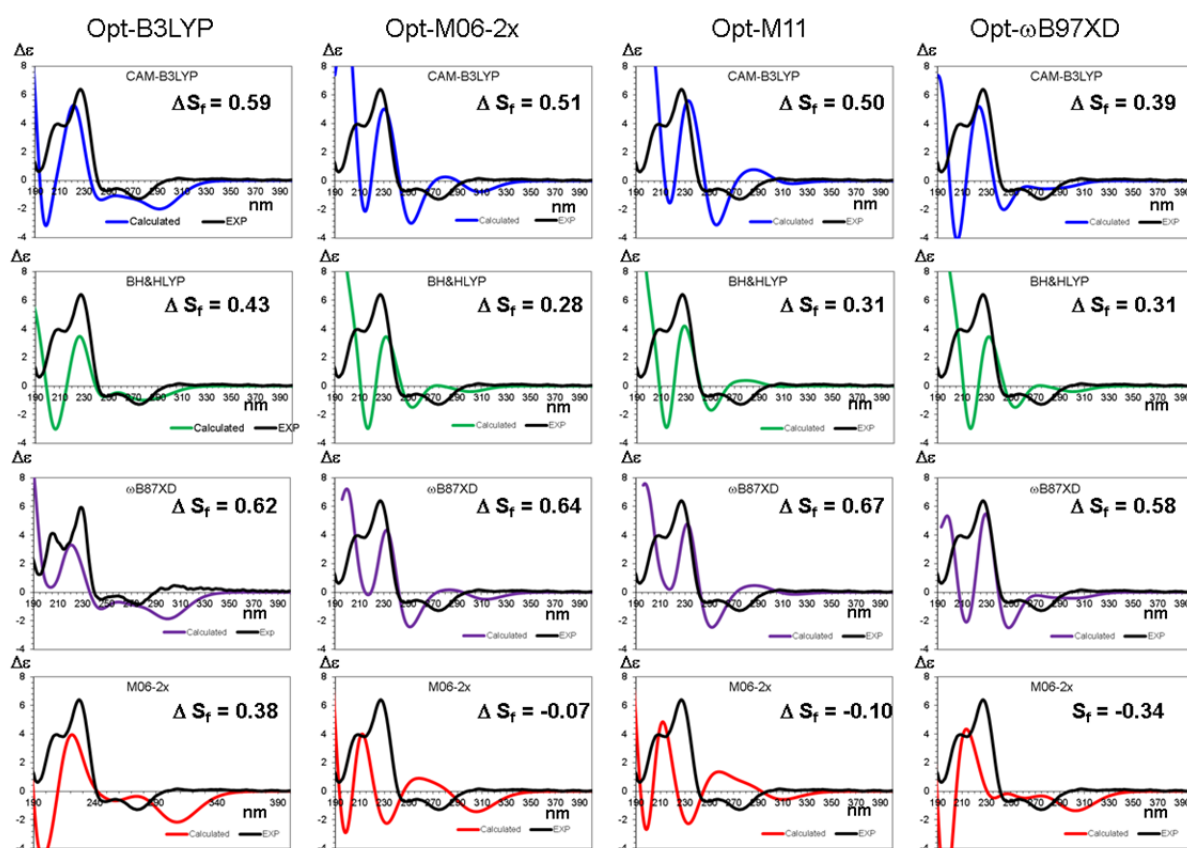

| Geometry Optimization Functional | TD-DFT Functional | Similarity Factor | Similarity factor Enant. | $\Delta S_f$ | Red shift (nm) | Scaling factor |
|----------------------------------|-------------------|-------------------|--------------------------|--------------|----------------|----------------|
| B3LYP                            | CAM-B3LYP         | 0.704             | 0.110                    | 0.59         | 5              | 0.95           |
| B3LYP                            | BH&HLYP           | 0.669             | 0.239                    | 0.43         | 15             | 0.51           |
| B3LYP                            | $\omega$ B97X-D   | 0.630             | 0.012                    | 0.62         | 12             | 0.81           |
| B3LYP                            | M06-2x            | 0.521             | 0.146                    | 0.38         | 0              | 1.02           |
| M06-2x                           | CAM-B3LYP         | 0.605             | 0.092                    | 0.51         | 20             | 0.98           |
| M06-2x                           | BH&HLYP           | 0.484             | 0.201                    | 0.28         | 25             | 0.75           |
| M06-2x                           | $\omega$ B97X-D   | 0.654             | 0.010                    | 0.64         | 26             | 0.55           |
| M06-2x                           | M06-2x            | 0.305             | 0.372                    | -0.07        | 0              | 1.5            |
| M11                              | CAM-B3LYP         | 0.573             | 0.075                    | 0.50         | 23             | 0.95           |
| M11                              | BH&HLYP           | 0.506             | 0.198                    | 0.31         | 22             | 0.75           |
| M11                              | $\omega$ B97X-D   | 0.691             | 0.023                    | 0.67         | 26             | 0.55           |
| M11                              | M06-2x            | 0.363             | 0.464                    | -0.10        | 0              | 1.41           |
| $\omega$ B97X-D                  | CAM-B3LYP         | 0.610             | 0.219                    | 0.39         | 12             | 0.85           |
| $\omega$ B97X-D                  | BH&HLYP           | 0.578             | 0.273                    | 0.31         | 15             | 0.75           |
| $\omega$ B97X-D                  | $\omega$ B97X-D   | 0.687             | 0.104                    | 0.58         | 23             | 0.65           |
| $\omega$ B97X-D                  | M06-2x            | 0.478             | 0.136                    | 0.34         | 0              | 1.6            |

**Figure S31.** TD-DFT simulations (colored traces) of the experimental ECD spectrum (black trace) of **1b**. Simulated spectra were red-shifted and scaled to have the best match with the experimental spectrum, as from the table. Similarity factor were obtained with SpecDis software.

### Crystal data for compound **1a**

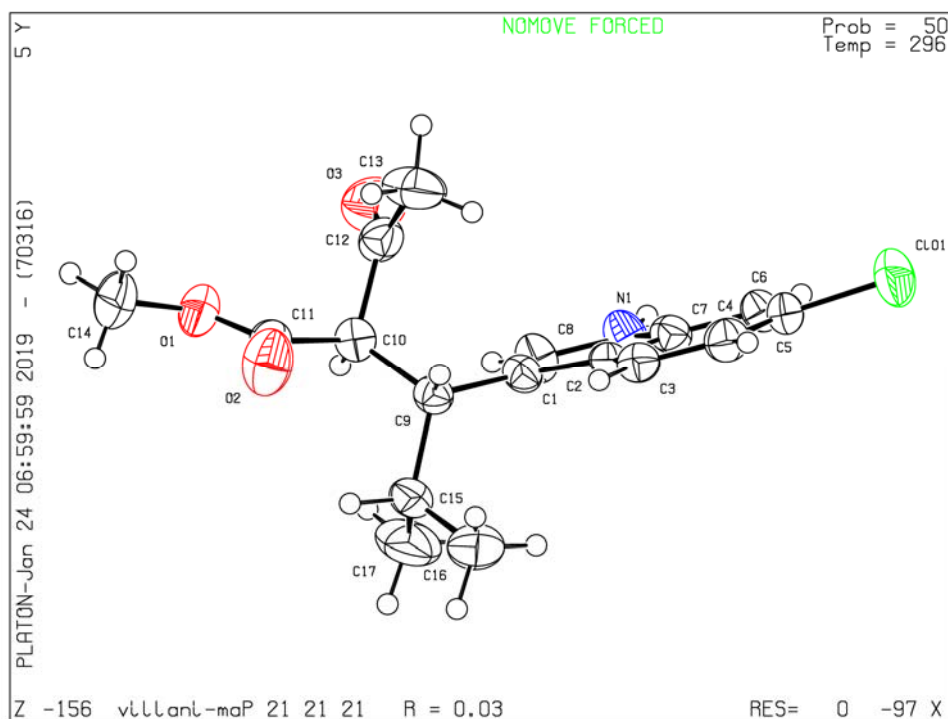

A specimen of  $C_{17}H_{20}ClNO_3$ , approximate dimensions 0.250 mm x 0.400 mm x 0.400 mm, was used for the X-ray crystallographic analysis. The X-ray intensity data were measured. The total exposure time was 16.55 hours. The frames were integrated with the Bruker SAINT software package using a narrow-frame algorithm. The integration of the data using an orthorhombic unit cell yielded a total of 5581 reflections to a maximum  $\theta$  angle of  $26.00^\circ$  ( $0.81 \text{ \AA}$  resolution), of which 3184 were independent (average redundancy 1.753, completeness = 97.9%,  $R_{\text{int}} = 1.70\%$ ,  $R_{\text{sig}} = 2.79\%$ ) and 2977 (93.50%) were greater than  $2\sigma(F^2)$ . The final cell constants of  $a = 10.0517(8) \text{ \AA}$ ,  $b = 11.1214(9) \text{ \AA}$ ,  $c = 15.3258(14) \text{ \AA}$ , volume =  $1713.3(2) \text{ \AA}^3$ , are based upon the refinement of the XYZ-centroids of 9921 reflections above  $20 \sigma(I)$  with  $4.530^\circ < 2\theta < 70.17^\circ$ . Data were corrected for absorption effects using the Multi-Scan method (SADABS). The ratio of minimum to maximum apparent transmission was 0.903. The calculated minimum and maximum transmission coefficients (based on crystal size) are 0.9120 and 0.9440. The structure was solved and refined using the Bruker SHELXTL Software Package, using the space group P 21 21 21, with  $Z = 4$  for the formula unit,  $C_{17}H_{20}ClNO_3$ . The final anisotropic full-matrix least-squares refinement on  $F^2$  with 208 variables converged at  $R1 = 3.32\%$ , for the observed data and  $wR2 = 8.39\%$  for all data. The goodness-of-fit was 1.036. The largest peak in the final difference electron density synthesis was  $0.167 \text{ e}^-/\text{\AA}^3$  and the largest hole was  $-0.191 \text{ e}^-/\text{\AA}^3$  with an RMS deviation of  $0.027 \text{ e}^-/\text{\AA}^3$ . On the basis of the final model, the calculated density was  $1.248 \text{ g/cm}^3$  and  $F(000)$ , 680  $e^-$ . Flack parameter for the  $9R,10R$  absolute configuration: 0.03(2). CCDC 1897062 contains the full data.

**Table 1. Sample and crystal data for mazza1802.**

|                               |                                                   |                     |
|-------------------------------|---------------------------------------------------|---------------------|
| <b>Identification code</b>    | mazza1802                                         |                     |
| <b>Chemical formula</b>       | C <sub>17</sub> H <sub>20</sub> ClNO <sub>3</sub> |                     |
| <b>Formula weight</b>         | 321.79 g/mol                                      |                     |
| <b>Temperature</b>            | 296(2) K                                          |                     |
| <b>Wavelength</b>             | 0.71073 Å                                         |                     |
| <b>Crystal size</b>           | 0.250 x 0.400 x 0.400 mm                          |                     |
| <b>Crystal system</b>         | orthorhombic                                      |                     |
| <b>Space group</b>            | P 21 21 21                                        |                     |
| <b>Unit cell dimensions</b>   | a = 10.0517(8) Å                                  | $\alpha = 90^\circ$ |
|                               | b = 11.1214(9) Å                                  | $\beta = 90^\circ$  |
|                               | c = 15.3258(14) Å                                 | $\gamma = 90^\circ$ |
| <b>Volume</b>                 | 1713.3(2) Å <sup>3</sup>                          |                     |
| <b>Z</b>                      | 4                                                 |                     |
| <b>Density (calculated)</b>   | 1.248 g/cm <sup>3</sup>                           |                     |
| <b>Absorption coefficient</b> | 0.234 mm <sup>-1</sup>                            |                     |
| <b>F(000)</b>                 | 680                                               |                     |

**Table 2. Data collection and structure refinement for mazza1802.**

|                                            |                                                                                                                                                                       |  |
|--------------------------------------------|-----------------------------------------------------------------------------------------------------------------------------------------------------------------------|--|
| <b>Theta range for data collection</b>     | 2.26 to 26.00°                                                                                                                                                        |  |
| <b>Index ranges</b>                        | -10 ≤ h ≤ 12, -13 ≤ k ≤ 13, -18 ≤ l ≤ 8                                                                                                                               |  |
| <b>Reflections collected</b>               | 5581                                                                                                                                                                  |  |
| <b>Independent reflections</b>             | 3184 [R(int) = 0.0170]                                                                                                                                                |  |
| <b>Coverage of independent reflections</b> | 97.9%                                                                                                                                                                 |  |
| <b>Absorption correction</b>               | Multi-Scan                                                                                                                                                            |  |
| <b>Max. and min. transmission</b>          | 0.9440 and 0.9120                                                                                                                                                     |  |
| <b>Structure solution technique</b>        | direct methods                                                                                                                                                        |  |
| <b>Structure solution program</b>          | XT, VERSION 2014/5                                                                                                                                                    |  |
| <b>Refinement method</b>                   | Full-matrix least-squares on F <sup>2</sup>                                                                                                                           |  |
| <b>Refinement program</b>                  | SHELXL-2014/7 (Sheldrick, 2014)                                                                                                                                       |  |
| <b>Function minimized</b>                  | $\Sigma w(F_o^2 - F_c^2)^2$                                                                                                                                           |  |
| <b>Data / restraints / parameters</b>      | 3184 / 0 / 208                                                                                                                                                        |  |
| <b>Goodness-of-fit on F<sup>2</sup></b>    | 1.036                                                                                                                                                                 |  |
| <b>Final R indices</b>                     | 2977 data; I > 2σ(I) R1 = 0.0332, wR2 = 0.0820                                                                                                                        |  |
|                                            | all data R1 = 0.0364, wR2 = 0.0839                                                                                                                                    |  |
| <b>Weighting scheme</b>                    | w = 1/[σ <sup>2</sup> (F <sub>o</sub> <sup>2</sup> ) + (0.0397P) <sup>2</sup> + 0.2876P]<br>where P = (F <sub>o</sub> <sup>2</sup> + 2F <sub>c</sub> <sup>2</sup> )/3 |  |
| <b>Absolute structure parameter</b>        | 0.03(2)                                                                                                                                                               |  |
| <b>Extinction coefficient</b>              | 0.0670(90)                                                                                                                                                            |  |
| <b>Largest diff. peak and hole</b>         | 0.167 and -0.191 eÅ <sup>-3</sup>                                                                                                                                     |  |
| <b>R.M.S. deviation from mean</b>          | 0.027 eÅ <sup>-3</sup>                                                                                                                                                |  |

**Table 3. Atomic coordinates and equivalent isotropic atomic displacement parameters ( $\text{\AA}^2$ ) for mazza1802.**

U(eq) is defined as one third of the trace of the orthogonalized  $U_{ij}$  tensor.

|      | x/a         | y/b         | z/c         | U(eq)      |
|------|-------------|-------------|-------------|------------|
| Cl01 | 0.82987(7)  | 0.65765(7)  | 0.54100(5)  | 0.0673(3)  |
| O1   | 0.72731(17) | 0.40851(19) | 0.26475(13) | 0.0586(5)  |
| O2   | 0.6217(2)   | 0.57758(19) | 0.23033(16) | 0.0715(6)  |
| N1   | 0.1257(2)   | 0.31808(19) | 0.41484(14) | 0.0472(5)  |
| O3   | 0.5419(2)   | 0.3181(2)   | 0.43352(14) | 0.0777(7)  |
| C3   | 0.1250(2)   | 0.63079(19) | 0.36867(14) | 0.0381(5)  |
| C1   | 0.2558(2)   | 0.43484(19) | 0.33085(13) | 0.0350(5)  |
| C9   | 0.3682(2)   | 0.47821(19) | 0.27364(13) | 0.0349(5)  |
| C7   | 0.0776(2)   | 0.4322(2)   | 0.42395(14) | 0.0376(5)  |
| C2   | 0.1557(2)   | 0.50763(19) | 0.37098(12) | 0.0325(4)  |
| C4   | 0.0231(2)   | 0.6738(2)   | 0.41944(15) | 0.0448(5)  |
| C6   | 0.9739(2)   | 0.4747(2)   | 0.47586(15) | 0.0431(5)  |
| C8   | 0.2340(2)   | 0.3208(2)   | 0.36017(15) | 0.0445(5)  |
| C10  | 0.4997(2)   | 0.4157(2)   | 0.29862(14) | 0.0386(5)  |
| C5   | 0.9512(2)   | 0.5957(2)   | 0.47261(16) | 0.0439(6)  |
| C11  | 0.6201(2)   | 0.4781(2)   | 0.25944(15) | 0.0436(5)  |
| C12  | 0.5217(2)   | 0.4120(2)   | 0.39720(16) | 0.0476(6)  |
| C15  | 0.3387(3)   | 0.4701(3)   | 0.17431(15) | 0.0492(6)  |
| C13  | 0.5180(4)   | 0.5285(3)   | 0.44583(18) | 0.0703(9)  |
| C16  | 0.2322(3)   | 0.5604(4)   | 0.14832(19) | 0.0768(10) |
| C17  | 0.3042(4)   | 0.3449(3)   | 0.1448(2)   | 0.0820(10) |
| C14  | 0.8516(3)   | 0.4608(4)   | 0.2370(2)   | 0.0778(10) |

**Table 4. Bond lengths ( $\text{\AA}$ ) for mazza1802.**

|         |          |        |          |
|---------|----------|--------|----------|
| Cl01-C5 | 1.750(2) | O1-C11 | 1.330(3) |
| O1-C14  | 1.442(3) | O2-C11 | 1.193(3) |
| N1-C7   | 1.365(3) | N1-C8  | 1.374(3) |
| N1-H1N  | 0.84(3)  | O3-C12 | 1.200(3) |
| C3-C4   | 1.372(3) | C3-C2  | 1.405(3) |
| C3-H3   | 0.93     | C1-C8  | 1.363(3) |
| C1-C2   | 1.431(3) | C1-C9  | 1.509(3) |
| C9-C10  | 1.542(3) | C9-C15 | 1.554(3) |
| C9-H9   | 0.98     | C7-C6  | 1.394(3) |

|          |          |          |          |
|----------|----------|----------|----------|
| C7-C2    | 1.406(3) | C4-C5    | 1.393(4) |
| C4-H4    | 0.93     | C6-C5    | 1.366(4) |
| C6-H6    | 0.93     | C8-H8    | 0.93     |
| C10-C11  | 1.518(3) | C10-C12  | 1.527(3) |
| C10-H10  | 0.98     | C12-C13  | 1.496(4) |
| C15-C17  | 1.504(4) | C15-C16  | 1.521(4) |
| C15-H15  | 0.98     | C13-H13A | 0.96     |
| C13-H13B | 0.96     | C13-H13C | 0.96     |
| C16-H16A | 0.96     | C16-H16B | 0.96     |
| C16-H16C | 0.96     | C17-H17A | 0.96     |
| C17-H17B | 0.96     | C17-H17C | 0.96     |
| C14-H14A | 0.96     | C14-H14B | 0.96     |
| C14-H14C | 0.96     |          |          |

**Table 5. Bond angles (°) for mazza1802.**

|             |            |             |            |
|-------------|------------|-------------|------------|
| C11-O1-C14  | 116.7(2)   | C7-N1-C8    | 108.8(2)   |
| C7-N1-H1N   | 124.4(18)  | C8-N1-H1N   | 125.6(18)  |
| C4-C3-C2    | 119.3(2)   | C4-C3-H3    | 120.3      |
| C2-C3-H3    | 120.3      | C8-C1-C2    | 105.74(18) |
| C8-C1-C9    | 127.5(2)   | C2-C1-C9    | 126.56(18) |
| C1-C9-C10   | 110.69(17) | C1-C9-C15   | 114.06(18) |
| C10-C9-C15  | 112.38(18) | C1-C9-H9    | 106.4      |
| C10-C9-H9   | 106.4      | C15-C9-H9   | 106.4      |
| N1-C7-C6    | 129.6(2)   | N1-C7-C2    | 107.3(2)   |
| C6-C7-C2    | 123.0(2)   | C3-C2-C7    | 118.3(2)   |
| C3-C2-C1    | 134.1(2)   | C7-C2-C1    | 107.65(19) |
| C3-C4-C5    | 120.1(2)   | C3-C4-H4    | 119.9      |
| C5-C4-H4    | 119.9      | C5-C6-C7    | 116.0(2)   |
| C5-C6-H6    | 122.0      | C7-C6-H6    | 122.0      |
| C1-C8-N1    | 110.4(2)   | C1-C8-H8    | 124.8      |
| N1-C8-H8    | 124.8      | C11-C10-C12 | 106.74(19) |
| C11-C10-C9  | 112.22(18) | C12-C10-C9  | 112.44(19) |
| C11-C10-H10 | 108.4      | C12-C10-H10 | 108.4      |
| C9-C10-H10  | 108.4      | C6-C5-C4    | 123.3(2)   |
| C6-C5-Cl01  | 118.85(19) | C4-C5-Cl01  | 117.81(19) |
| O2-C11-O1   | 123.5(2)   | O2-C11-C10  | 125.7(2)   |
| O1-C11-C10  | 110.8(2)   | O3-C12-C13  | 121.8(2)   |

|               |          |               |          |
|---------------|----------|---------------|----------|
| O3-C12-C10    | 120.4(3) | C13-C12-C10   | 117.8(2) |
| C17-C15-C16   | 111.7(3) | C17-C15-C9    | 113.1(2) |
| C16-C15-C9    | 110.6(2) | C17-C15-H15   | 107.0    |
| C16-C15-H15   | 107.0    | C9-C15-H15    | 107.0    |
| C12-C13-H13A  | 109.5    | C12-C13-H13B  | 109.5    |
| H13A-C13-H13B | 109.5    | C12-C13-H13C  | 109.5    |
| H13A-C13-H13C | 109.5    | H13B-C13-H13C | 109.5    |
| C15-C16-H16A  | 109.5    | C15-C16-H16B  | 109.5    |
| H16A-C16-H16B | 109.5    | C15-C16-H16C  | 109.5    |
| H16A-C16-H16C | 109.5    | H16B-C16-H16C | 109.5    |
| C15-C17-H17A  | 109.5    | C15-C17-H17B  | 109.5    |
| H17A-C17-H17B | 109.5    | C15-C17-H17C  | 109.5    |
| H17A-C17-H17C | 109.5    | H17B-C17-H17C | 109.5    |
| O1-C14-H14A   | 109.5    | O1-C14-H14B   | 109.5    |
| H14A-C14-H14B | 109.5    | O1-C14-H14C   | 109.5    |
| H14A-C14-H14C | 109.5    | H14B-C14-H14C | 109.5    |

**Table 6. Torsion angles (°) for mazza1802.**

|                |             |                |             |
|----------------|-------------|----------------|-------------|
| C8-C1-C9-C10   | -38.7(3)    | C2-C1-C9-C10   | 136.1(2)    |
| C8-C1-C9-C15   | 89.2(3)     | C2-C1-C9-C15   | -96.0(3)    |
| C8-N1-C7-C6    | -176.5(2)   | C8-N1-C7-C2    | 2.0(3)      |
| C4-C3-C2-C7    | 1.7(3)      | C4-C3-C2-C1    | -176.9(2)   |
| N1-C7-C2-C3    | 179.6(2)    | C6-C7-C2-C3    | -1.8(3)     |
| N1-C7-C2-C1    | -1.5(2)     | C6-C7-C2-C1    | 177.1(2)    |
| C8-C1-C2-C3    | 179.1(2)    | C9-C1-C2-C3    | 3.4(4)      |
| C8-C1-C2-C7    | 0.4(2)      | C9-C1-C2-C7    | -175.33(19) |
| C2-C3-C4-C5    | 0.0(3)      | N1-C7-C6-C5    | 178.4(2)    |
| C2-C7-C6-C5    | 0.1(3)      | C2-C1-C8-N1    | 0.9(3)      |
| C9-C1-C8-N1    | 176.5(2)    | C7-N1-C8-C1    | -1.8(3)     |
| C1-C9-C10-C11  | -165.52(18) | C15-C9-C10-C11 | 65.7(2)     |
| C1-C9-C10-C12  | -45.2(2)    | C15-C9-C10-C12 | -174.0(2)   |
| C7-C6-C5-C4    | 1.8(3)      | C7-C6-C5-Cl01  | -175.96(17) |
| C3-C4-C5-C6    | -1.9(4)     | C3-C4-C5-Cl01  | 175.92(18)  |
| C14-O1-C11-O2  | 3.0(4)      | C14-O1-C11-C10 | -174.6(2)   |
| C12-C10-C11-O2 | -106.8(3)   | C9-C10-C11-O2  | 16.8(3)     |
| C12-C10-C11-O1 | 70.7(2)     | C9-C10-C11-O1  | -165.69(19) |
| C11-C10-C12-O3 | -111.4(3)   | C9-C10-C12-O3  | 125.1(3)    |



|                 |          |                |           |
|-----------------|----------|----------------|-----------|
| C11-C10-C12-C13 | 68.3(3)  | C9-C10-C12-C13 | -55.2(3)  |
| C1-C9-C15-C17   | -57.3(3) | C10-C9-C15-C17 | 69.7(3)   |
| C1-C9-C15-C16   | 68.9(3)  | C10-C9-C15-C16 | -164.0(2) |

**Table 7. Anisotropic atomic displacement parameters ( $\text{\AA}^2$ ) for mazza1802.**

The anisotropic atomic displacement factor exponent takes the form: -

$$2\pi^2 [ h^2 a^{*2} U_{11} + \dots + 2 h k a^* b^* U_{12} ]$$

|      | $U_{11}$   | $U_{22}$   | $U_{33}$   | $U_{23}$    | $U_{13}$    | $U_{12}$    |
|------|------------|------------|------------|-------------|-------------|-------------|
| Cl01 | 0.0552(4)  | 0.0829(5)  | 0.0638(4)  | -0.0080(4)  | 0.0184(3)   | 0.0190(4)   |
| O1   | 0.0349(9)  | 0.0762(13) | 0.0646(11) | 0.0027(10)  | 0.0026(8)   | 0.0006(9)   |
| O2   | 0.0570(11) | 0.0573(12) | 0.1001(16) | 0.0220(11)  | 0.0146(12)  | -0.0111(10) |
| N1   | 0.0579(12) | 0.0361(10) | 0.0477(11) | 0.0080(9)   | 0.0163(10)  | -0.0042(10) |
| O3   | 0.0917(16) | 0.0730(14) | 0.0684(13) | 0.0329(11)  | -0.0105(11) | 0.0114(12)  |
| C3   | 0.0400(11) | 0.0360(11) | 0.0384(11) | 0.0010(9)   | -0.0020(10) | -0.0028(9)  |
| C1   | 0.0379(11) | 0.0365(11) | 0.0305(10) | 0.0011(8)   | 0.0030(9)   | -0.0024(9)  |
| C9   | 0.0368(11) | 0.0353(10) | 0.0327(10) | 0.0018(8)   | 0.0014(9)   | -0.0024(9)  |
| C7   | 0.0404(11) | 0.0401(12) | 0.0322(10) | 0.0026(9)   | -0.0004(9)  | -0.0017(10) |
| C2   | 0.0322(10) | 0.0380(11) | 0.0273(9)  | -0.0004(8)  | -0.0027(8)  | -0.0020(9)  |
| C4   | 0.0460(12) | 0.0417(12) | 0.0469(12) | -0.0038(11) | -0.0036(10) | 0.0066(11)  |
| C6   | 0.0398(11) | 0.0544(13) | 0.0352(11) | 0.0038(10)  | 0.0055(9)   | -0.0038(11) |
| C8   | 0.0512(13) | 0.0346(11) | 0.0477(13) | 0.0029(10)  | 0.0120(11)  | 0.0017(10)  |
| C10  | 0.0399(12) | 0.0335(11) | 0.0424(12) | 0.0007(9)   | 0.0027(9)   | -0.0010(10) |
| C5   | 0.0339(11) | 0.0593(15) | 0.0386(12) | -0.0071(11) | 0.0031(10)  | 0.0074(10)  |
| C11  | 0.0398(12) | 0.0494(13) | 0.0417(12) | -0.0010(11) | 0.0002(10)  | -0.0045(11) |
| C12  | 0.0403(12) | 0.0559(14) | 0.0466(13) | 0.0137(11)  | -0.0032(10) | -0.0011(11) |
| C15  | 0.0451(13) | 0.0712(16) | 0.0315(11) | 0.0033(11)  | 0.0028(10)  | -0.0067(13) |
| C13  | 0.090(2)   | 0.079(2)   | 0.0422(14) | -0.0040(13) | -0.0113(15) | -0.0165(18) |
| C16  | 0.0707(19) | 0.114(3)   | 0.0458(15) | 0.0192(17)  | -0.0098(15) | 0.010(2)    |
| C17  | 0.102(3)   | 0.096(2)   | 0.0477(15) | -0.0247(17) | -0.0050(16) | -0.019(2)   |
| C14  | 0.0367(14) | 0.118(3)   | 0.079(2)   | -0.011(2)   | 0.0054(14)  | -0.0107(16) |

### Crystal data for compound **2b**

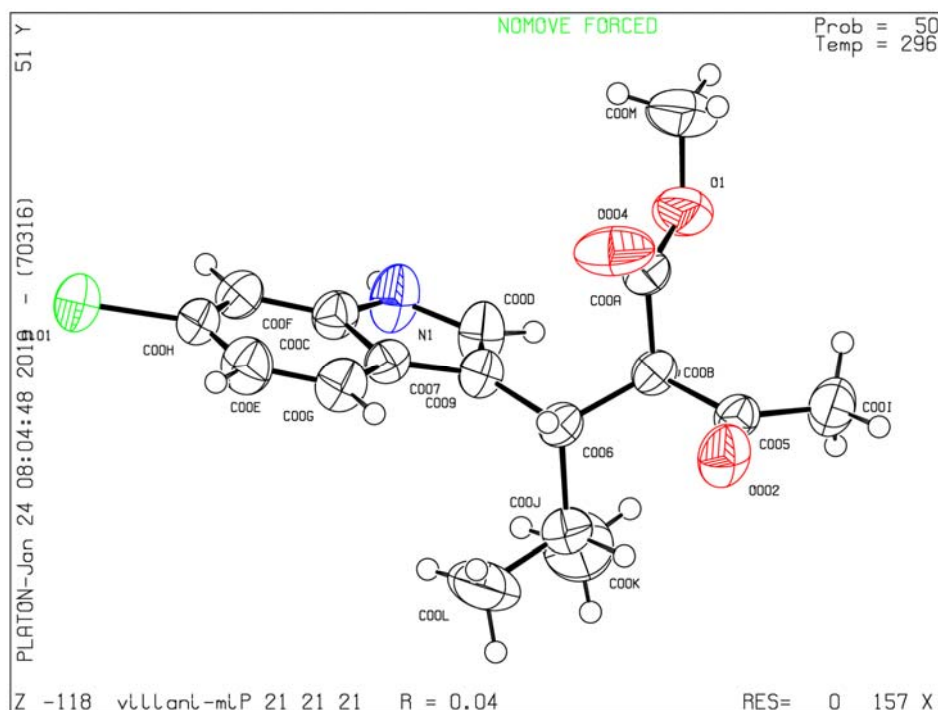

A specimen of  $C_{17}H_{20}ClNO_3$ , approximate dimensions 0.100 mm x 0.100 mm x 0.300 mm, was used for the X-ray crystallographic analysis. The X-ray intensity data were measured. The total exposure time was 13.33 hours. The frames were integrated with the Bruker SAINT software package using a narrow-frame algorithm. The integration of the data using an orthorhombic unit cell yielded a total of 24496 reflections to a maximum  $\theta$  angle of  $27.25^\circ$  ( $0.78 \text{ \AA}$  resolution), of which 3897 were independent (average redundancy 6.286, completeness = 99.5%,  $R_{\text{int}} = 3.31\%$ ,  $R_{\text{sig}} = 2.23\%$ ) and 3445 (88.40%) were greater than  $2\sigma(F^2)$ . The final cell constants of  $a = 9.9020(12) \text{ \AA}$ ,  $b = 19.022(2) \text{ \AA}$ ,  $c = 9.2904(11) \text{ \AA}$ , volume =  $1749.9(4) \text{ \AA}^3$ , are based upon the refinement of the XYZ-centroids of 9886 reflections above  $20 \sigma(I)$  with  $4.384^\circ < 2\theta < 53.59^\circ$ . Data were corrected for absorption effects using the Multi-Scan method (SADABS). The ratio of minimum to maximum apparent transmission was 0.866. The calculated minimum and maximum transmission coefficients (based on crystal size) are 0.9340 and 0.9770. The structure was solved and refined using the Bruker SHELXTL Software Package, using the space group P 21 21 21, with  $Z = 4$  for the formula unit,  $C_{17}H_{20}ClNO_3$ . The final anisotropic full-matrix least-squares refinement on  $F^2$  with 207 variables converged at  $R1 = 4.31\%$ , for the observed data and  $wR2 = 11.45\%$  for all data. The goodness-of-fit was 1.063. The largest peak in the final difference electron density synthesis was  $0.162 \text{ e}^-/\text{\AA}^3$  and the largest hole was  $-0.223 \text{ e}^-/\text{\AA}^3$  with an RMS deviation of  $0.035 \text{ e}^-/\text{\AA}^3$ . On the basis of the final model, the calculated density was  $1.221 \text{ g/cm}^3$  and  $F(000)$ , 680  $e^-$ . Flack parameter for the C006S,C00BR absolute configuration: 0.04(2). CCDC 1897063 contains the full data.

**Table 1. Sample and crystal data for mazza1801.**

|                        |                                                                                          |
|------------------------|------------------------------------------------------------------------------------------|
| Identification code    | mazza1801                                                                                |
| Chemical formula       | C <sub>17</sub> H <sub>20</sub> ClNO <sub>3</sub>                                        |
| Formula weight         | 321.79 g/mol                                                                             |
| Temperature            | 296(2) K                                                                                 |
| Wavelength             | 0.71073 Å                                                                                |
| Crystal size           | 0.100 x 0.100 x 0.300 mm                                                                 |
| Crystal system         | orthorhombic                                                                             |
| Space group            | P 21 21 21                                                                               |
| Unit cell dimensions   | a = 9.9020(12) Å    α = 90°<br>b = 19.022(2) Å    β = 90°<br>c = 9.2904(11) Å    γ = 90° |
| Volume                 | 1749.9(4) Å <sup>3</sup>                                                                 |
| Z                      | 4                                                                                        |
| Density (calculated)   | 1.221 g/cm <sup>3</sup>                                                                  |
| Absorption coefficient | 0.229 mm <sup>-1</sup>                                                                   |
| F(000)                 | 680                                                                                      |

**Table 2. Data collection and structure refinement for mazza1801.**

|                                     |                                                                              |                              |
|-------------------------------------|------------------------------------------------------------------------------|------------------------------|
| Theta range for data collection     | 2.32 to 27.25°                                                               |                              |
| Index ranges                        | -12<=h<=12, -24<=k<=24, -11<=l<=11                                           |                              |
| Reflections collected               | 24496                                                                        |                              |
| Independent reflections             | 3897 [R(int) = 0.0331]                                                       |                              |
| Coverage of independent reflections | 99.5%                                                                        |                              |
| Absorption correction               | Multi-Scan                                                                   |                              |
| Max. and min. transmission          | 0.9770 and 0.9340                                                            |                              |
| Structure solution technique        | direct methods                                                               |                              |
| Structure solution program          | XT, VERSION 2014/5                                                           |                              |
| Refinement method                   | Full-matrix least-squares on F <sup>2</sup>                                  |                              |
| Refinement program                  | SHELXL-2014/7 (Sheldrick, 2014)                                              |                              |
| Function minimized                  | Σ w(F <sub>o</sub> <sup>2</sup> - F <sub>c</sub> <sup>2</sup> ) <sup>2</sup> |                              |
| Data / restraints / parameters      | 3897 / 0 / 207                                                               |                              |
| Goodness-of-fit on F <sup>2</sup>   | 1.063                                                                        |                              |
| Final R indices                     | 3445 data; I>2σ(I)                                                           | R1 = 0.0431, wR2 =<br>0.1099 |

|                                     |                                                                           |                              |
|-------------------------------------|---------------------------------------------------------------------------|------------------------------|
|                                     | all data                                                                  | R1 = 0.0507, wR2 =<br>0.1145 |
| <b>Weighting scheme</b>             | $w=1/[\sigma^2(F_o^2)+(0.0622P)^2+0.2438P]$<br>where $P=(F_o^2+2F_c^2)/3$ |                              |
| <b>Absolute structure parameter</b> | 0.040(17)                                                                 |                              |
| <b>Largest diff. peak and hole</b>  | 0.162 and -0.223 eÅ <sup>-3</sup>                                         |                              |
| <b>R.M.S. deviation from mean</b>   | 0.035 eÅ <sup>-3</sup>                                                    |                              |

**Table 3. Atomic coordinates and equivalent isotropic atomic displacement parameters (Å<sup>2</sup>) for mazza1801.**

U(eq) is defined as one third of the trace of the orthogonalized U<sub>ij</sub> tensor.

|      | <b>x/a</b>  | <b>y/b</b>  | <b>z/c</b>  | <b>U(eq)</b> |
|------|-------------|-------------|-------------|--------------|
| ClO1 | 0.64753(10) | 0.50764(5)  | 0.79235(10) | 0.0819(3)    |
| O002 | 0.3535(2)   | 0.73230(11) | 0.93555(19) | 0.0665(6)    |
| O1   | 0.3935(3)   | 0.86798(11) | 0.2801(3)   | 0.0822(7)    |
| O004 | 0.5416(2)   | 0.78861(13) | 0.2065(3)   | 0.0852(8)    |
| C005 | 0.2968(3)   | 0.77291(13) | 0.0139(2)   | 0.0441(5)    |
| C006 | 0.3219(2)   | 0.68814(13) | 0.2251(2)   | 0.0412(5)    |
| C007 | 0.4294(2)   | 0.63781(12) | 0.4611(2)   | 0.0406(5)    |
| N1   | 0.3166(3)   | 0.70093(15) | 0.6225(2)   | 0.0646(7)    |
| C009 | 0.3412(2)   | 0.68442(13) | 0.3864(2)   | 0.0427(5)    |
| C00A | 0.4293(3)   | 0.80704(14) | 0.2226(3)   | 0.0504(6)    |
| C00B | 0.3062(2)   | 0.76489(13) | 0.1776(2)   | 0.0409(5)    |
| C00C | 0.4101(3)   | 0.64929(13) | 0.6086(3)   | 0.0469(6)    |
| C00D | 0.2752(3)   | 0.72143(16) | 0.4891(3)   | 0.0593(7)    |
| C00E | 0.5897(3)   | 0.54847(16) | 0.5223(3)   | 0.0598(7)    |
| C00F | 0.4769(3)   | 0.61054(14) | 0.7141(3)   | 0.0542(6)    |
| C00G | 0.5233(3)   | 0.58707(14) | 0.4202(3)   | 0.0529(6)    |
| C00H | 0.5649(3)   | 0.56067(14) | 0.6669(3)   | 0.0538(6)    |
| C00I | 0.2168(4)   | 0.83303(16) | 0.9590(3)   | 0.0658(8)    |
| C00J | 0.2044(3)   | 0.64118(16) | 0.1707(4)   | 0.0673(8)    |
| C00K | 0.0712(4)   | 0.6578(3)   | 0.2399(7)   | 0.1142(18)   |
| C00L | 0.2412(5)   | 0.56401(19) | 0.1846(7)   | 0.1121(17)   |
| C00M | 0.5047(6)   | 0.9132(2)   | 0.3217(6)   | 0.1169(19)   |

**Table 4. Bond lengths (Å) for mazza1801.**

|           |          |           |          |
|-----------|----------|-----------|----------|
| Cl01-C00H | 1.745(3) | O002-C005 | 1.201(3) |
| O1-C00A   | 1.325(3) | O1-C00M   | 1.449(5) |
| O004-C00A | 1.175(4) | C005-C00I | 1.481(4) |
| C005-C00B | 1.532(3) | C006-C009 | 1.513(3) |
| C006-C00B | 1.533(3) | C006-C00J | 1.551(4) |
| C006-H006 | 0.98     | C007-C00G | 1.393(3) |
| C007-C00C | 1.401(3) | C007-C009 | 1.425(3) |
| N1-C00C   | 1.356(4) | N1-C00D   | 1.362(4) |
| N1-H1N    | 0.83(4)  | C009-C00D | 1.354(4) |
| C00A-C00B | 1.518(4) | C00B-H00B | 0.98     |
| C00C-C00F | 1.394(4) | C00D-H00D | 0.93     |
| C00E-C00G | 1.368(4) | C00E-C00H | 1.385(4) |
| C00E-H00E | 0.93     | C00F-C00H | 1.360(4) |
| C00F-H00F | 0.93     | C00G-H00G | 0.93     |
| C00I-H00A | 0.96     | C00I-H00C | 0.96     |
| C00I-H00H | 0.96     | C00J-C00K | 1.501(6) |
| C00J-C00L | 1.518(5) | C00J-H00J | 0.98     |
| C00K-H00I | 0.96     | C00K-H00K | 0.96     |
| C00K-H00L | 0.96     | C00L-H00M | 0.96     |
| C00L-H00N | 0.96     | C00L-H00O | 0.96     |
| C00M-H00P | 0.96     | C00M-H00Q | 0.96     |
| C00M-H00R | 0.96     |           |          |

**Table 5. Bond angles (°) for mazza1801.**

|                |            |                |          |
|----------------|------------|----------------|----------|
| C00A-O1-C00M   | 115.1(3)   | O002-C005-C00I | 122.6(2) |
| O002-C005-C00B | 120.6(2)   | C00I-C005-C00B | 116.8(2) |
| C009-C006-C00B | 110.02(19) | C009-C006-C00J | 113.0(2) |
| C00B-C006-C00J | 112.3(2)   | C009-C006-H006 | 107.1    |
| C00B-C006-H006 | 107.1      | C00J-C006-H006 | 107.1    |
| C00G-C007-C00C | 117.8(2)   | C00G-C007-C009 | 135.0(2) |
| C00C-C007-C009 | 107.2(2)   | C00C-N1-C00D   | 109.1(2) |
| C00C-N1-H1N    | 125.(3)    | C00D-N1-H1N    | 124.(3)  |
| C00D-C009-C007 | 106.1(2)   | C00D-C009-C006 | 127.8(2) |
| C007-C009-C006 | 126.1(2)   | O004-C00A-O1   | 124.4(3) |
| O004-C00A-C00B | 124.6(2)   | O1-C00A-C00B   | 111.0(2) |
| C00A-C00B-C005 | 105.6(2)   | C00A-C00B-C006 | 110.0(2) |
| C005-C00B-C006 | 112.76(19) | C00A-C00B-H00B | 109.4    |

|                |          |                |          |
|----------------|----------|----------------|----------|
| C005-C00B-H00B | 109.4    | C006-C00B-H00B | 109.4    |
| N1-C00C-C00F   | 129.8(2) | N1-C00C-C007   | 107.4(2) |
| C00F-C00C-C007 | 122.7(2) | C009-C00D-N1   | 110.3(2) |
| C009-C00D-H00D | 124.9    | N1-C00D-H00D   | 124.9    |
| C00G-C00E-C00H | 119.8(3) | C00G-C00E-H00E | 120.1    |
| C00H-C00E-H00E | 120.1    | C00H-C00F-C00C | 116.5(2) |
| C00H-C00F-H00F | 121.8    | C00C-C00F-H00F | 121.8    |
| C00E-C00G-C007 | 120.2(2) | C00E-C00G-H00G | 119.9    |
| C007-C00G-H00G | 119.9    | C00F-C00H-C00E | 122.9(3) |
| C00F-C00H-CI01 | 119.2(2) | C00E-C00H-CI01 | 117.9(2) |
| C005-C00I-H00A | 109.5    | C005-C00I-H00C | 109.5    |
| H00A-C00I-H00C | 109.5    | C005-C00I-H00H | 109.5    |
| H00A-C00I-H00H | 109.5    | H00C-C00I-H00H | 109.5    |
| C00K-C00J-C00L | 112.2(4) | C00K-C00J-C006 | 113.5(3) |
| C00L-C00J-C006 | 110.5(3) | C00K-C00J-H00J | 106.8    |
| C00L-C00J-H00J | 106.8    | C006-C00J-H00J | 106.8    |
| C00J-C00K-H00I | 109.5    | C00J-C00K-H00K | 109.5    |
| H00I-C00K-H00K | 109.5    | C00J-C00K-H00L | 109.5    |
| H00I-C00K-H00L | 109.5    | H00K-C00K-H00L | 109.5    |
| C00J-C00L-H00M | 109.5    | C00J-C00L-H00N | 109.5    |
| H00M-C00L-H00N | 109.5    | C00J-C00L-H00O | 109.5    |
| H00M-C00L-H00O | 109.5    | H00N-C00L-H00O | 109.5    |
| O1-C00M-H00P   | 109.5    | O1-C00M-H00Q   | 109.5    |
| H00P-C00M-H00Q | 109.5    | O1-C00M-H00R   | 109.5    |
| H00P-C00M-H00R | 109.5    | H00Q-C00M-H00R | 109.5    |

**Table 6. Torsion angles (°) for mazza1801.**

|                     |           |                     |           |
|---------------------|-----------|---------------------|-----------|
| C00G-C007-C009-C00D | -179.6(3) | C00C-C007-C009-C00D | 0.5(3)    |
| C00G-C007-C009-C006 | 3.2(4)    | C00C-C007-C009-C006 | -176.7(2) |
| C00B-C006-C009-C00D | 42.1(4)   | C00J-C006-C009-C00D | -84.3(4)  |
| C00B-C006-C009-C007 | -141.4(2) | C00J-C006-C009-C007 | 92.3(3)   |
| C00M-O1-C00A-O004   | 1.1(5)    | C00M-O1-C00A-C00B   | -177.8(3) |
| O004-C00A-C00B-C005 | -76.0(4)  | O1-C00A-C00B-C005   | 102.9(3)  |
| O004-C00A-C00B-C006 | 46.0(4)   | O1-C00A-C00B-C006   | -135.1(2) |
| O002-C005-C00B-C00A | 89.6(3)   | C00I-C005-C00B-C00A | -89.6(3)  |
| O002-C005-C00B-C006 | -30.7(3)  | C00I-C005-C00B-C006 | 150.2(2)  |
| C009-C006-C00B-C00A | 58.0(3)   | C00J-C006-C00B-C00A | -175.2(2) |

|                     |           |                     |           |
|---------------------|-----------|---------------------|-----------|
| C009-C006-C00B-C005 | 175.7(2)  | C00J-C006-C00B-C005 | -57.5(3)  |
| C00D-N1-C00C-C00F   | -177.3(3) | C00D-N1-C00C-C007   | 0.9(4)    |
| C00G-C007-C00C-N1   | 179.2(2)  | C009-C007-C00C-N1   | -0.9(3)   |
| C00G-C007-C00C-C00F | -2.4(4)   | C009-C007-C00C-C00F | 177.5(2)  |
| C007-C009-C00D-N1   | 0.1(3)    | C006-C009-C00D-N1   | 177.2(3)  |
| C00C-N1-C00D-C009   | -0.6(4)   | N1-C00C-C00F-C00H   | 178.9(3)  |
| C007-C00C-C00F-C00H | 0.8(4)    | C00H-C00E-C00G-C007 | -1.0(4)   |
| C00C-C007-C00G-C00E | 2.4(4)    | C009-C007-C00G-C00E | -177.4(3) |
| C00C-C00F-C00H-C00E | 0.7(4)    | C00C-C00F-C00H-Cl01 | -177.5(2) |
| C00G-C00E-C00H-C00F | -0.6(5)   | C00G-C00E-C00H-Cl01 | 177.6(2)  |
| C009-C006-C00J-C00K | 57.1(4)   | C00B-C006-C00J-C00K | -68.1(3)  |
| C009-C006-C00J-C00L | -69.9(4)  | C00B-C006-C00J-C00L | 164.9(3)  |

**Table 7. Anisotropic atomic displacement parameters ( $\text{\AA}^2$ ) for mazza1801.**

The anisotropic atomic displacement factor exponent takes the form: -

$$2\pi^2 [ h^2 a^{*2} U_{11} + \dots + 2 h k a^* b^* U_{12} ]$$

|      | $U_{11}$   | $U_{22}$   | $U_{33}$   | $U_{23}$    | $U_{13}$    | $U_{12}$    |
|------|------------|------------|------------|-------------|-------------|-------------|
| Cl01 | 0.0921(6)  | 0.0655(5)  | 0.0882(6)  | 0.0175(4)   | -0.0408(5)  | 0.0026(4)   |
| O002 | 0.0891(14) | 0.0739(13) | 0.0364(9)  | -0.0041(9)  | 0.0066(10)  | 0.0161(12)  |
| O1   | 0.0986(18) | 0.0472(10) | 0.1008(18) | -0.0184(11) | -0.0356(15) | 0.0052(11)  |
| O004 | 0.0506(12) | 0.0947(17) | 0.110(2)   | -0.0374(15) | -0.0002(13) | -0.0123(11) |
| C005 | 0.0494(13) | 0.0480(13) | 0.0348(10) | -0.0007(9)  | -0.0011(10) | -0.0047(11) |
| C006 | 0.0435(12) | 0.0459(12) | 0.0342(10) | -0.0022(9)  | 0.0001(9)   | 0.0006(10)  |
| C007 | 0.0393(11) | 0.0467(12) | 0.0356(11) | -0.0015(9)  | 0.0025(9)   | -0.0010(9)  |
| N1   | 0.0820(18) | 0.0777(16) | 0.0340(10) | -0.0017(10) | 0.0119(11)  | 0.0309(14)  |
| C009 | 0.0413(11) | 0.0498(12) | 0.0369(10) | 0.0011(9)   | 0.0046(9)   | 0.0042(11)  |
| C00A | 0.0615(16) | 0.0507(13) | 0.0389(11) | -0.0026(10) | -0.0058(11) | -0.0040(12) |
| C00B | 0.0419(12) | 0.0480(13) | 0.0328(10) | -0.0025(9)  | 0.0020(9)   | 0.0016(10)  |
| C00C | 0.0529(13) | 0.0501(13) | 0.0376(11) | -0.0021(10) | 0.0009(10)  | 0.0030(11)  |
| C00D | 0.0679(17) | 0.0671(17) | 0.0429(13) | 0.0055(12)  | 0.0101(12)  | 0.0269(14)  |
| C00E | 0.0531(15) | 0.0583(15) | 0.0679(17) | -0.0006(13) | 0.0000(13)  | 0.0170(13)  |
| C00F | 0.0683(16) | 0.0558(14) | 0.0384(12) | -0.0005(11) | -0.0075(12) | -0.0038(13) |
| C00G | 0.0529(14) | 0.0596(15) | 0.0463(13) | -0.0062(11) | 0.0060(12)  | 0.0098(12)  |
| C00H | 0.0553(15) | 0.0489(13) | 0.0571(15) | 0.0086(11)  | -0.0186(12) | -0.0037(12) |
| C00I | 0.0765(18) | 0.0673(18) | 0.0537(15) | 0.0054(13)  | -0.0124(14) | 0.0111(15)  |
| C00J | 0.0717(19) | 0.0605(17) | 0.0697(18) | 0.0106(14)  | -0.0256(16) | -0.0188(15) |

|      |            |          |          |           |           |           |
|------|------------|----------|----------|-----------|-----------|-----------|
| COOK | 0.0492(18) | 0.121(3) | 0.173(5) | 0.036(3)  | -0.025(2) | -0.021(2) |
| COOL | 0.108(3)   | 0.061(2) | 0.168(5) | -0.005(3) | -0.044(3) | -0.024(2) |
| COOM | 0.144(4)   | 0.063(2) | 0.143(4) | -0.019(2) | -0.058(4) | -0.020(3) |



Compound **1a**, optimization level B3LYP/6-31G(d)

Conformation #1

|    |             |             |             |
|----|-------------|-------------|-------------|
| C  | 4.25850200  | -0.04613800 | -0.39328700 |
| C  | 3.78830300  | -0.35468400 | 0.87506600  |
| C  | 2.40878100  | -0.24245900 | 1.07498300  |
| C  | 1.51198400  | 0.17071300  | 0.05065500  |
| C  | 2.04018300  | 0.47030600  | -1.21779400 |
| C  | 3.40661400  | 0.36056200  | -1.43773200 |
| C  | 0.17886900  | 0.15940900  | 0.61180100  |
| C  | 0.32200900  | -0.25533000 | 1.91584700  |
| N  | 1.65394100  | -0.48655700 | 2.20033200  |
| C  | -1.10334400 | 0.51086700  | -0.10952200 |
| C  | -1.55686200 | 1.99800200  | 0.07856700  |
| C  | -1.91096100 | 2.36485500  | 1.52692400  |
| C  | -0.51485500 | 2.97494300  | -0.48552900 |
| C  | -2.24552800 | -0.48486500 | 0.25522900  |
| C  | -3.46600300 | -0.23893900 | -0.62318900 |
| C  | -1.82145600 | -1.97024200 | 0.12112600  |
| O  | -3.45359600 | -0.19714200 | -1.83728400 |
| O  | -1.98112000 | -2.72074600 | 1.06333400  |
| O  | -4.58165700 | -0.08272500 | 0.11648700  |
| C  | -5.79470300 | 0.12704800  | -0.62986500 |
| C  | -1.22292200 | -2.42952200 | -1.19092600 |
| Cl | 5.98774100  | -0.16919600 | -0.71190600 |
| H  | 4.46439500  | -0.66921200 | 1.66300700  |
| H  | 1.39066500  | 0.78864000  | -2.02814300 |
| H  | 3.82959800  | 0.58729800  | -2.41012200 |
| H  | -0.42940200 | -0.43378000 | 2.67177200  |
| H  | 2.00503200  | -0.84304900 | 3.07560800  |
| H  | -0.92480500 | 0.38939700  | -1.18510700 |
| H  | -2.46553300 | 2.11495700  | -0.52915200 |
| H  | -1.04689100 | 2.23858900  | 2.18928400  |
| H  | -2.22134200 | 3.41448200  | 1.58378800  |
| H  | -2.73636100 | 1.76133600  | 1.92011300  |
| H  | -0.88838700 | 4.00409300  | -0.43174800 |
| H  | -0.28874900 | 2.75879000  | -1.53635100 |
| H  | 0.42390400  | 2.92974900  | 0.07722200  |
| H  | -2.54866800 | -0.36957200 | 1.29684100  |
| H  | -6.58181000 | 0.22650600  | 0.11754800  |
| H  | -5.71930100 | 1.03408300  | -1.23516400 |
| H  | -5.99080600 | -0.72446100 | -1.28632300 |
| H  | -1.19690100 | -3.52095000 | -1.21173800 |
| H  | -1.78783800 | -2.03630200 | -2.04141400 |
| H  | -0.19666100 | -2.05061000 | -1.27426800 |

Compound **1a**, optimization level B3LYP/6-31G(d)

Conformation #4

|    |             |             |             |
|----|-------------|-------------|-------------|
| C  | -3.91038700 | -0.06183400 | -0.01613400 |
| C  | -3.30714300 | -0.33213700 | 1.20381400  |
| C  | -1.92131700 | -0.51957700 | 1.18845800  |
| C  | -1.14510900 | -0.44188100 | -0.00200500 |
| C  | -1.80613100 | -0.16543500 | -1.21166400 |
| C  | -3.18208500 | 0.02339000  | -1.21778600 |
| C  | 0.23269600  | -0.68402800 | 0.36299000  |
| C  | 0.23507800  | -0.89116100 | 1.72267800  |
| N  | -1.05146900 | -0.79937600 | 2.21775700  |
| C  | 1.40806100  | -0.70475100 | -0.59282000 |
| C  | 2.09090300  | -2.10247000 | -0.70120200 |
| C  | 1.07877300  | -3.15169900 | -1.18834900 |
| C  | 3.31372800  | -2.09058700 | -1.63260500 |
| C  | 2.41255400  | 0.47300600  | -0.34903200 |
| C  | 1.65595300  | 1.79445100  | -0.21273400 |
| C  | 3.38351400  | 0.32170000  | 0.83622600  |
| O  | 1.66897700  | 2.51741800  | 0.76066000  |
| O  | 3.23812800  | -0.52715500 | 1.69550900  |
| O  | 0.95864500  | 2.06417800  | -1.33423600 |
| C  | 0.14306300  | 3.25028800  | -1.28530600 |
| C  | 4.56527800  | 1.27228100  | 0.86268800  |
| Cl | -5.65655000 | 0.18687200  | -0.06570600 |
| H  | -3.89010200 | -0.39251000 | 2.11683200  |
| H  | -1.25068200 | -0.09444000 | -2.14260400 |
| H  | -3.70716100 | 0.23600000  | -2.14263100 |
| H  | 1.06942600  | -1.08681100 | 2.37853700  |
| H  | -1.30255800 | -0.88282000 | 3.19057400  |
| H  | 0.99838000  | -0.49240300 | -1.58856000 |
| H  | 2.42757200  | -2.38939100 | 0.30048500  |
| H  | 0.20413600  | -3.20474500 | -0.53370300 |
| H  | 0.72618800  | -2.91947600 | -2.20228900 |
| H  | 1.54051300  | -4.14541900 | -1.21828800 |
| H  | 3.70820700  | -3.10571600 | -1.75486100 |
| H  | 4.13346100  | -1.47426100 | -1.24670600 |
| H  | 3.05121300  | -1.71840500 | -2.63248100 |
| H  | 3.02891000  | 0.57304400  | -1.25276600 |
| H  | 0.75992200  | 4.13002400  | -1.08617600 |
| H  | -0.32517100 | 3.32087900  | -2.26708000 |
| H  | -0.61522200 | 3.15459200  | -0.50485200 |
| H  | 4.20503000  | 2.30048500  | 0.97344200  |
| H  | 5.21632100  | 1.01949600  | 1.70181300  |
| H  | 5.13268100  | 1.21780600  | -0.07476200 |

Compound **1a**, optimization level B3LYP/6-31G(d)

## Conformation #6

|    |             |             |             |
|----|-------------|-------------|-------------|
| C  | 4.18236100  | -0.10013400 | -0.48911500 |
| C  | 3.77472700  | -0.26708100 | 0.82652800  |
| C  | 2.40664800  | -0.12651700 | 1.08014500  |
| C  | 1.46057000  | 0.17765700  | 0.06189600  |
| C  | 1.92633600  | 0.33568500  | -1.25562300 |
| C  | 3.28033500  | 0.19584300  | -1.52874400 |
| C  | 0.15651300  | 0.23434600  | 0.68492900  |
| C  | 0.36364800  | -0.03626300 | 2.01813000  |
| N  | 1.70789800  | -0.24289100 | 2.26056900  |
| C  | -1.16036700 | 0.51175200  | -0.00733400 |
| C  | -1.61030900 | 2.01049800  | 0.04996300  |
| C  | -1.94411300 | 2.50748700  | 1.46390400  |
| C  | -0.57904600 | 2.92992200  | -0.62024000 |
| C  | -2.26868900 | -0.44621700 | 0.52588600  |
| C  | -3.61590000 | -0.20073400 | -0.14710200 |
| C  | -1.88128100 | -1.94565900 | 0.45062900  |
| O  | -4.61888700 | 0.15310100  | 0.43110500  |
| O  | -2.07149100 | -2.64962900 | 1.42274900  |
| O  | -3.56677600 | -0.41612900 | -1.48409500 |
| C  | -4.80372600 | -0.20035700 | -2.18825600 |
| C  | -1.27599700 | -2.49277900 | -0.82626600 |
| Cl | 5.89365600  | -0.26592600 | -0.87649200 |
| H  | 4.48860900  | -0.49777600 | 1.61011200  |
| H  | 1.23827400  | 0.56914300  | -2.06316700 |
| H  | 3.65543700  | 0.31458300  | -2.53922000 |
| H  | -0.34811200 | -0.12071200 | 2.82698900  |
| H  | 2.10236000  | -0.49711900 | 3.15291800  |
| H  | -1.02599600 | 0.28245100  | -1.07178600 |
| H  | -2.53124900 | 2.07297000  | -0.54781500 |
| H  | -1.07622300 | 2.42339500  | 2.12832400  |
| H  | -2.23392000 | 3.56391400  | 1.43121200  |
| H  | -2.77904500 | 1.95617700  | 1.90844800  |
| H  | -0.95575500 | 3.95842200  | -0.66104000 |
| H  | -0.36367800 | 2.61435900  | -1.64822900 |
| H  | 0.36694000  | 2.94154900  | -0.06817700 |
| H  | -2.45335900 | -0.26072100 | 1.58508800  |
| H  | -4.58666600 | -0.42114200 | -3.23354000 |
| H  | -5.58156300 | -0.86582200 | -1.80575800 |
| H  | -5.13271200 | 0.83544700  | -2.07275300 |
| H  | -1.84863300 | -2.17799500 | -1.70312200 |
| H  | -0.25434300 | -2.11134400 | -0.94321200 |
| H  | -1.24083600 | -3.58224800 | -0.76294100 |

Compound **1a**, optimization level B3LYP/6-31G(d)

Conformation #7

|    |             |             |             |
|----|-------------|-------------|-------------|
| C  | -3.98626200 | -0.34431900 | -0.45004500 |
| C  | -3.73279900 | 0.21617300  | 0.79262200  |
| C  | -2.40377300 | 0.54758700  | 1.07361200  |
| C  | -1.33498600 | 0.34305100  | 0.15132100  |
| C  | -1.65403700 | -0.22890300 | -1.09655900 |
| C  | -2.96704800 | -0.57099700 | -1.39251500 |
| C  | -0.11940700 | 0.79617900  | 0.80198400  |
| C  | -0.50111900 | 1.23041100  | 2.04779400  |
| N  | -1.86421900 | 1.09710700  | 2.21375700  |
| C  | 1.32176000  | 0.78352300  | 0.33247800  |
| C  | 1.69314900  | 1.89844600  | -0.69595300 |
| C  | 1.03958200  | 1.75841000  | -2.07887300 |
| C  | 1.42337500  | 3.29221900  | -0.11006900 |
| C  | 1.72314800  | -0.64511900 | -0.12719200 |
| C  | 3.12830800  | -0.74979500 | -0.71750600 |
| C  | 1.64898500  | -1.65530200 | 1.04872100  |
| O  | 3.38729600  | -1.27251600 | -1.78117200 |
| O  | 1.87020800  | -1.31701500 | 2.19198800  |
| O  | 4.05995000  | -0.22797400 | 0.10574000  |
| C  | 5.41782400  | -0.31469700 | -0.36121800 |
| C  | 1.29865500  | -3.07805700 | 0.66671800  |
| Cl | -5.64091500 | -0.78884600 | -0.86453100 |
| H  | -4.53209000 | 0.38290400  | 1.50710800  |
| H  | -0.88739500 | -0.39966900 | -1.84467100 |
| H  | -3.21748200 | -1.01082000 | -2.35159500 |
| H  | 0.11443900  | 1.61311200  | 2.85006600  |
| H  | -2.37509400 | 1.32489900  | 3.05237100  |
| H  | 1.93233000  | 0.98108400  | 1.22045600  |
| H  | 2.77981900  | 1.81826300  | -0.83728900 |
| H  | -0.04848100 | 1.86807600  | -2.02228800 |
| H  | 1.41399600  | 2.53993900  | -2.75061600 |
| H  | 1.26761400  | 0.79430200  | -2.54783300 |
| H  | 1.79658300  | 4.07116400  | -0.78511900 |
| H  | 1.92097200  | 3.42269600  | 0.85877800  |
| H  | 0.35122500  | 3.46126100  | 0.03869400  |
| H  | 1.06614000  | -1.00538200 | -0.92135600 |
| H  | 6.02387000  | 0.13989400  | 0.42242600  |
| H  | 5.70316000  | -1.35871000 | -0.51342900 |
| H  | 5.53405600  | 0.22737400  | -1.30335300 |
| H  | 1.88825500  | -3.40649900 | -0.19750900 |
| H  | 1.45829200  | -3.74707000 | 1.51471200  |
| H  | 0.24310200  | -3.11900700 | 0.36682300  |

Compound **1a**, optimization level B3LYP/6-31G(d)

Conformation #8

|    |             |             |             |
|----|-------------|-------------|-------------|
| C  | -3.86177900 | -0.09785900 | -0.11811700 |
| C  | -3.29119600 | -0.32867700 | 1.12539400  |
| C  | -1.90792500 | -0.53385400 | 1.14927000  |
| C  | -1.10446000 | -0.51634200 | -0.02534600 |
| C  | -1.73168800 | -0.27095600 | -1.26000000 |
| C  | -3.10427500 | -0.06379700 | -1.30416500 |
| C  | 0.26077100  | -0.76713600 | 0.38084100  |
| C  | 0.23049100  | -0.91241400 | 1.74745800  |
| N  | -1.06487600 | -0.77787700 | 2.20998500  |
| C  | 1.45750200  | -0.86215300 | -0.54374100 |
| C  | 2.26847300  | -2.18114000 | -0.36433100 |
| C  | 1.37921900  | -3.39422000 | -0.68320400 |
| C  | 3.53398400  | -2.22556900 | -1.23585800 |
| C  | 2.34111000  | 0.43266400  | -0.53174000 |
| C  | 1.43975400  | 1.62302900  | -0.86194100 |
| C  | 3.21283000  | 0.65854500  | 0.71237600  |
| O  | 0.96160100  | 1.81568800  | -1.95831400 |
| O  | 3.11924900  | -0.02280400 | 1.71608800  |
| O  | 1.19954100  | 2.40421200  | 0.20955500  |
| C  | 0.26485900  | 3.47973700  | -0.00558900 |
| C  | 4.27147300  | 1.74317700  | 0.59946500  |
| Cl | -5.60309900 | 0.17125000  | -0.21733100 |
| H  | -3.89580800 | -0.34607700 | 2.02612300  |
| H  | -1.15106700 | -0.22139700 | -2.17629000 |
| H  | -3.60306400 | 0.12914700  | -2.24755900 |
| H  | 1.04615700  | -1.08056500 | 2.43355700  |
| H  | -1.34261800 | -0.83922800 | 3.17709900  |
| H  | 1.06061600  | -0.88712400 | -1.56777800 |
| H  | 2.57852100  | -2.24642400 | 0.68419600  |
| H  | 1.07283200  | -3.39017500 | -1.73770600 |
| H  | 1.92283200  | -4.32827600 | -0.49976300 |
| H  | 0.47292100  | -3.40358300 | -0.07101700 |
| H  | 4.01331300  | -3.20795700 | -1.15724900 |
| H  | 4.28042700  | -1.48180200 | -0.93556800 |
| H  | 3.29654100  | -2.06045500 | -2.29560700 |
| H  | 3.02584700  | 0.37200300  | -1.38681000 |
| H  | 0.19749400  | 4.00029200  | 0.94967800  |
| H  | 0.62695100  | 4.15070500  | -0.78851900 |
| H  | -0.70768500 | 3.07640000  | -0.29666700 |
| H  | 3.82712600  | 2.69903400  | 0.30447000  |
| H  | 4.78271900  | 1.85326900  | 1.55783700  |
| H  | 5.00475800  | 1.47111600  | -0.17095000 |

Compound **1a**, optimization level B3LYP/6-31G(d)

Conformation #9

|    |             |             |             |
|----|-------------|-------------|-------------|
| C  | -4.37253400 | -0.24282400 | -0.35647000 |
| C  | -3.91566100 | 0.64536000  | 0.60710000  |
| C  | -2.53203000 | 0.69839600  | 0.80257600  |
| C  | -1.62014500 | -0.10529800 | 0.06428700  |
| C  | -2.13372500 | -0.98902400 | -0.90057100 |
| C  | -3.50492800 | -1.05604000 | -1.10977400 |
| C  | -0.28760100 | 0.22195900  | 0.52010800  |
| C  | -0.44390400 | 1.18232500  | 1.49217100  |
| N  | -1.78573500 | 1.46688400  | 1.66791300  |
| C  | 0.98528100  | -0.43354300 | 0.03101000  |
| C  | 1.16625100  | -1.83459000 | 0.71697100  |
| C  | 2.14369700  | -2.77022200 | -0.01447700 |
| C  | 1.51846200  | -1.74608900 | 2.20907900  |
| C  | 2.21367700  | 0.51392300  | 0.17213200  |
| C  | 3.42235500  | -0.00814000 | -0.59551500 |
| C  | 1.92868800  | 1.95494600  | -0.33508600 |
| O  | 3.43117500  | -0.28408900 | -1.77805500 |
| O  | 2.15174800  | 2.89613400  | 0.40161900  |
| O  | 4.51026800  | -0.09316000 | 0.19719600  |
| C  | 5.71774800  | -0.52809400 | -0.45538700 |
| C  | 1.39240200  | 2.13265500  | -1.73862300 |
| Cl | -6.10685300 | -0.35779000 | -0.65097500 |
| H  | -4.60541700 | 1.26239700  | 1.17312000  |
| H  | -1.46981800 | -1.61910600 | -1.48630500 |
| H  | -3.91908400 | -1.73086000 | -1.85066700 |
| H  | 0.30109500  | 1.71595500  | 2.06462000  |
| H  | -2.15000900 | 2.17150700  | 2.29011300  |
| H  | 0.86575300  | -0.62926300 | -1.04285000 |
| H  | 0.17266100  | -2.29771700 | 0.64597600  |
| H  | 3.18769900  | -2.47995000 | 0.14510100  |
| H  | 2.03557300  | -3.79173000 | 0.36889000  |
| H  | 1.96123300  | -2.79254500 | -1.09426600 |
| H  | 1.46148500  | -2.73877200 | 2.67012100  |
| H  | 0.82936900  | -1.08815000 | 2.74885900  |
| H  | 2.53937600  | -1.37572200 | 2.36195700  |
| H  | 2.49811900  | 0.63028300  | 1.21909800  |
| H  | 6.48499300  | -0.51921400 | 0.31878200  |
| H  | 5.59091200  | -1.53473900 | -0.86223500 |
| H  | 5.97941700  | 0.15492200  | -1.26733100 |
| H  | 1.96276200  | 1.53387700  | -2.45456800 |
| H  | 0.35252400  | 1.78631700  | -1.77715800 |
| H  | 1.42427400  | 3.19148200  | -2.00333600 |

Compound **1a**, optimization level B3LYP/6-31G(d)

## Conformation #16

|    |             |             |             |
|----|-------------|-------------|-------------|
| C  | 4.18792500  | -0.25241700 | -0.43389400 |
| C  | 3.80360400  | 0.05814000  | 0.86212600  |
| C  | 2.43848500  | 0.28255800  | 1.07029500  |
| C  | 1.47742600  | 0.20854800  | 0.02549500  |
| C  | 1.91791700  | -0.12007400 | -1.26784500 |
| C  | 3.26786500  | -0.34740400 | -1.49571600 |
| C  | 0.18385600  | 0.49689700  | 0.60110200  |
| C  | 0.40891700  | 0.71821900  | 1.94071900  |
| N  | 1.75736500  | 0.59249300  | 2.22623700  |
| C  | -1.13430200 | 0.53992500  | -0.14398000 |
| C  | -1.68960100 | 1.98171900  | -0.37201400 |
| C  | -2.12957400 | 2.70578400  | 0.90943300  |
| C  | -0.68850800 | 2.83732900  | -1.16235100 |
| C  | -2.15513100 | -0.40986700 | 0.53646600  |
| C  | -3.56901500 | -0.35174500 | -0.04049500 |
| C  | -1.69010300 | -1.88767000 | 0.44442800  |
| O  | -4.57597200 | -0.22335700 | 0.62407800  |
| O  | -1.01179100 | -2.28295000 | -0.47902500 |
| O  | -3.57056700 | -0.50536500 | -1.37961500 |
| C  | -4.86672300 | -0.49594500 | -2.00409500 |
| C  | -2.15365600 | -2.79263000 | 1.56741700  |
| Cl | 5.89530000  | -0.54533500 | -0.76583200 |
| H  | 4.53112700  | 0.11896500  | 1.66459500  |
| H  | 1.21063900  | -0.20824300 | -2.08697500 |
| H  | 3.62577300  | -0.60399400 | -2.48660900 |
| H  | -0.28621500 | 0.95771200  | 2.73334800  |
| H  | 2.17209600  | 0.71094400  | 3.13722000  |
| H  | -0.95673600 | 0.11589500  | -1.13729500 |
| H  | -2.57956200 | 1.86249000  | -1.00504400 |
| H  | -1.28176800 | 2.87235000  | 1.58379300  |
| H  | -2.54672800 | 3.68873200  | 0.66141100  |
| H  | -2.90366500 | 2.15290300  | 1.45370100  |
| H  | -1.12863700 | 3.80937700  | -1.41385200 |
| H  | -0.39616400 | 2.34948700  | -2.09972500 |
| H  | 0.22332900  | 3.02112800  | -0.58347600 |
| H  | -2.27977900 | -0.15881800 | 1.59331500  |
| H  | -4.67734300 | -0.63911800 | -3.06784400 |
| H  | -5.48604800 | -1.30542600 | -1.60955900 |
| H  | -5.37025200 | 0.45775200  | -1.82578900 |
| H  | -3.21651200 | -2.63491800 | 1.78511800  |
| H  | -1.96559400 | -3.83726900 | 1.31154800  |
| H  | -1.59927000 | -2.54151900 | 2.48156000  |

Compound **1a**, optimization level B3LYP/6-31G(d)

## Conformation #19

|    |             |             |             |
|----|-------------|-------------|-------------|
| C  | -3.88836300 | -0.58654300 | -0.43134600 |
| C  | -3.71885800 | 0.25535000  | 0.65731500  |
| C  | -2.42396800 | 0.72850100  | 0.89112100  |
| C  | -1.30825300 | 0.39148000  | 0.06849600  |
| C  | -1.54233200 | -0.46638900 | -1.02485300 |
| C  | -2.82004100 | -0.95247400 | -1.27017900 |
| C  | -0.14760000 | 1.05632600  | 0.63054300  |
| C  | -0.60413900 | 1.73507200  | 1.73391400  |
| N  | -1.96328300 | 1.55472200  | 1.88975500  |
| C  | 1.30917800  | 1.03602700  | 0.20988300  |
| C  | 1.64776500  | 1.93835900  | -1.02021400 |
| C  | 1.00377300  | 1.50471800  | -2.34550200 |
| C  | 1.31641300  | 3.40816600  | -0.72114000 |
| C  | 1.82513300  | -0.42045100 | 0.06976600  |
| C  | 3.33042100  | -0.49025600 | -0.17242300 |
| C  | 1.57751900  | -1.22277100 | 1.38020200  |
| O  | 4.14605300  | 0.33649200  | 0.16681800  |
| O  | 1.84818000  | -0.73829200 | 2.45857400  |
| O  | 3.65569900  | -1.65414800 | -0.78589600 |
| C  | 5.06363200  | -1.86365600 | -0.99945900 |
| C  | 1.01598800  | -2.61790100 | 1.22013400  |
| Cl | -5.49583100 | -1.22131700 | -0.77784500 |
| H  | -4.55516200 | 0.52577000  | 1.29340500  |
| H  | -0.73638700 | -0.74857200 | -1.69387900 |
| H  | -3.00574000 | -1.61172700 | -2.11097300 |
| H  | -0.04524200 | 2.33102100  | 2.44217500  |
| H  | -2.51961600 | 1.93242800  | 2.64079000  |
| H  | 1.87903300  | 1.45262800  | 1.04797700  |
| H  | 2.73530600  | 1.87506400  | -1.14087100 |
| H  | -0.08800500 | 1.58403700  | -2.31024800 |
| H  | 1.35464800  | 2.14869000  | -3.16057800 |
| H  | 1.26181700  | 0.47399300  | -2.61814200 |
| H  | 1.65779400  | 4.05222200  | -1.53997300 |
| H  | 1.80933800  | 3.74844900  | 0.19756500  |
| H  | 0.23784800  | 3.56035800  | -0.60110500 |
| H  | 1.33606000  | -0.94975000 | -0.75137000 |
| H  | 5.14348100  | -2.83591500 | -1.48618700 |
| H  | 5.47342600  | -1.07788400 | -1.63922300 |
| H  | 5.59963300  | -1.86268500 | -0.04690100 |
| H  | 0.01008300  | -2.56008700 | 0.78533700  |
| H  | 1.63684000  | -3.19446400 | 0.52417000  |
| H  | 0.96988000  | -3.11801500 | 2.18962200  |



Compound **1a**, optimization level B3LYP/6-31G(d)

## Conformation #33

|    |             |             |             |
|----|-------------|-------------|-------------|
| C  | 4.19642300  | 0.09720600  | 0.44262800  |
| C  | 3.71244400  | 0.62644300  | -0.74535200 |
| C  | 2.35725100  | 0.41303400  | -1.01756000 |
| C  | 1.50168200  | -0.30949900 | -0.14020800 |
| C  | 2.04090900  | -0.82447900 | 1.05143100  |
| C  | 3.38372000  | -0.62109300 | 1.34037900  |
| C  | 0.18872000  | -0.33779700 | -0.74079900 |
| C  | 0.29543000  | 0.35628800  | -1.92237100 |
| N  | 1.59287700  | 0.80925000  | -2.09211700 |
| C  | -1.05491500 | -0.95287200 | -0.13533800 |
| C  | -1.88161300 | -1.76051400 | -1.18107300 |
| C  | -1.05897100 | -2.96770400 | -1.66486400 |
| C  | -3.24785700 | -2.24067100 | -0.67123700 |
| C  | -1.80943100 | 0.14712200  | 0.68216400  |
| C  | -2.46285700 | 1.22287200  | -0.16895700 |
| C  | -2.73520400 | -0.43582000 | 1.78439600  |
| O  | -3.05247500 | 1.05710800  | -1.21731300 |
| O  | -2.39205000 | -1.43783400 | 2.37835800  |
| O  | -2.32180700 | 2.44083600  | 0.40617700  |
| C  | -2.92750500 | 3.53508500  | -0.30320500 |
| C  | -3.99617000 | 0.31905400  | 2.15116000  |
| Cl | 5.89724400  | 0.33338900  | 0.84591500  |
| H  | 4.36060600  | 1.17617000  | -1.41968200 |
| H  | 1.41834200  | -1.38033400 | 1.74745500  |
| H  | 3.81821300  | -1.01144200 | 2.25401900  |
| H  | -0.45794200 | 0.57325700  | -2.66651000 |
| H  | 1.93083600  | 1.31345100  | -2.89684900 |
| H  | -0.73573000 | -1.66644100 | 0.63403600  |
| H  | -2.07208600 | -1.10722500 | -2.03948200 |
| H  | -0.88252800 | -3.67417600 | -0.84328700 |
| H  | -1.59569600 | -3.50624300 | -2.45457100 |
| H  | -0.08547700 | -2.66579700 | -2.06297700 |
| H  | -3.74727800 | -2.82832000 | -1.45062300 |
| H  | -3.91037300 | -1.40245500 | -0.43243500 |
| H  | -3.15158200 | -2.87438000 | 0.21690300  |
| H  | -1.04255000 | 0.66632600  | 1.27350300  |
| H  | -2.71767100 | 4.42224000  | 0.29460100  |
| H  | -2.49139000 | 3.63127000  | -1.30074900 |
| H  | -4.00561600 | 3.38152000  | -0.40086300 |
| H  | -4.50575500 | -0.19886800 | 2.96557200  |
| H  | -3.74710100 | 1.34210200  | 2.45647700  |
| H  | -4.66417800 | 0.39617000  | 1.28478200  |

Compound **1a**, optimization level B3LYP/6-31G(d)

## Conformation #35

|    |             |             |             |
|----|-------------|-------------|-------------|
| C  | 4.22557900  | -0.27908500 | -0.36920700 |
| C  | 3.78407900  | -0.12121800 | 0.93619600  |
| C  | 2.41689200  | 0.12196700  | 1.10618800  |
| C  | 1.50930400  | 0.21259400  | 0.01599400  |
| C  | 2.00607800  | 0.03500700  | -1.28658700 |
| C  | 3.35908200  | -0.20785700 | -1.47703800 |
| C  | 0.19602000  | 0.47050900  | 0.56075200  |
| C  | 0.35796600  | 0.51471900  | 1.92706400  |
| N  | 1.68601600  | 0.30702500  | 2.25853200  |
| C  | -1.07967600 | 0.65195800  | -0.23689600 |
| C  | -1.58105400 | 2.12991400  | -0.30305700 |
| C  | -2.03687400 | 2.71009600  | 1.04424600  |
| C  | -0.52212200 | 3.03695500  | -0.94771700 |
| C  | -2.16042400 | -0.34532600 | 0.25183400  |
| C  | -3.44573800 | -0.28318200 | -0.56872400 |
| C  | -1.64725300 | -1.80842900 | 0.12127800  |
| O  | -3.52871500 | 0.03211000  | -1.73387300 |
| O  | -1.04475400 | -2.16579300 | -0.86784000 |
| O  | -4.50525200 | -0.68525200 | 0.17523400  |
| C  | -5.76287200 | -0.73281800 | -0.52378700 |
| C  | -1.96436400 | -2.73834600 | 1.27229700  |
| Cl | 5.93877400  | -0.58619200 | -0.65413900 |
| H  | 4.47095600  | -0.18677400 | 1.77336700  |
| H  | 1.33990800  | 0.07700900  | -2.14299900 |
| H  | 3.76024000  | -0.34895300 | -2.47450200 |
| H  | -0.36957700 | 0.68114600  | 2.70927900  |
| H  | 2.05787600  | 0.30308400  | 3.19533500  |
| H  | -0.86573700 | 0.35526700  | -1.26874200 |
| H  | -2.44833200 | 2.11950500  | -0.97318200 |
| H  | -1.20423400 | 2.77749500  | 1.75389800  |
| H  | -2.42907000 | 3.72405300  | 0.90376500  |
| H  | -2.83461700 | 2.11707700  | 1.50828800  |
| H  | -0.91791100 | 4.04992700  | -1.08634500 |
| H  | -0.21942300 | 2.65989500  | -1.93153000 |
| H  | 0.37705800  | 3.10990600  | -0.32561400 |
| H  | -2.42742100 | -0.16940400 | 1.29773600  |
| H  | -6.49150700 | -1.07934200 | 0.20942700  |
| H  | -6.03104700 | 0.26000100  | -0.89388900 |
| H  | -5.70547900 | -1.42384700 | -1.36867100 |
| H  | -3.03312100 | -2.69580700 | 1.51201200  |
| H  | -1.66982300 | -3.75961200 | 1.02269400  |
| H  | -1.41797700 | -2.40781100 | 2.16512800  |

Compound **1a**, optimization level B3LYP/6-31G(d)

Conformation #46

|    |             |             |             |
|----|-------------|-------------|-------------|
| C  | -3.91692500 | -0.57768700 | -0.40799600 |
| C  | -3.75061200 | 0.41880900  | 0.54079000  |
| C  | -2.44211700 | 0.86059000  | 0.76207700  |
| C  | -1.31415900 | 0.34095900  | 0.06427400  |
| C  | -1.54340000 | -0.67475000 | -0.88408400 |
| C  | -2.83367000 | -1.12838900 | -1.11742500 |
| C  | -0.14471100 | 1.03790600  | 0.56630200  |
| C  | -0.61043100 | 1.91398100  | 1.51915300  |
| N  | -1.98165100 | 1.81917500  | 1.63655000  |
| C  | 1.31761900  | 0.92275500  | 0.18764000  |
| C  | 1.71293800  | 1.70769800  | -1.10875400 |
| C  | 1.06926500  | 1.18283000  | -2.40038900 |
| C  | 1.44495000  | 3.21094000  | -0.94535100 |
| C  | 1.80951000  | -0.55620500 | 0.14047500  |
| C  | 3.32303000  | -0.60082700 | -0.03451100 |
| C  | 1.43661100  | -1.37303600 | 1.40527600  |
| O  | 4.12515300  | -0.01651400 | 0.66666800  |
| O  | 0.85764800  | -2.43255700 | 1.27897300  |
| O  | 3.67427600  | -1.38985900 | -1.06885400 |
| C  | 5.08972800  | -1.52096200 | -1.29538900 |
| C  | 1.82323800  | -0.81654200 | 2.75986200  |
| Cl | -5.54049000 | -1.17880500 | -0.73711200 |
| H  | -4.59758900 | 0.82871700  | 1.08076800  |
| H  | -0.72301100 | -1.11587600 | -1.43854000 |
| H  | -3.01720500 | -1.91233900 | -1.84360800 |
| H  | -0.05610500 | 2.61565600  | 2.12806700  |
| H  | -2.55127000 | 2.34829900  | 2.27816900  |
| H  | 1.88956100  | 1.40097700  | 0.99291700  |
| H  | 2.80151600  | 1.58983900  | -1.20672400 |
| H  | -0.02160600 | 1.27472700  | -2.37048400 |
| H  | 1.42728100  | 1.76252200  | -3.25925300 |
| H  | 1.31989400  | 0.13373200  | -2.59237600 |
| H  | 1.83370000  | 3.76425400  | -1.80798100 |
| H  | 1.93209200  | 3.61000300  | -0.04709900 |
| H  | 0.37225900  | 3.41967100  | -0.86854400 |
| H  | 1.35917500  | -1.09906700 | -0.69001800 |
| H  | 5.18593900  | -2.18782100 | -2.15218500 |
| H  | 5.53427900  | -0.54618200 | -1.51222100 |
| H  | 5.57873300  | -1.94854200 | -0.41646000 |
| H  | 2.84344900  | -0.42164000 | 2.74848000  |
| H  | 1.15022500  | 0.01150800  | 3.01313300  |
| H  | 1.71676900  | -1.59995200 | 3.51303100  |

Compound **1a**, optimization level B3LYP/6-31G(d)

## Conformation #59

|    |             |             |             |
|----|-------------|-------------|-------------|
| C  | 4.21375100  | -0.03164900 | -0.51943700 |
| C  | 3.81708600  | -0.44899700 | 0.74310300  |
| C  | 2.45737800  | -0.32301300 | 1.04472400  |
| C  | 1.50985400  | 0.20388800  | 0.12285900  |
| C  | 1.96397900  | 0.61426800  | -1.14316900 |
| C  | 3.31006600  | 0.49504100  | -1.46192400 |
| C  | 0.21733100  | 0.17583400  | 0.76813100  |
| C  | 0.42952600  | -0.35152100 | 2.02007000  |
| N  | 1.76911000  | -0.64500900 | 2.19306100  |
| C  | -1.09686400 | 0.65391800  | 0.18674000  |
| C  | -1.49947900 | 2.04012400  | 0.79371400  |
| C  | -0.41660100 | 3.09687900  | 0.52239500  |
| C  | -2.85988600 | 2.56883400  | 0.31046400  |
| C  | -2.23055400 | -0.40823800 | 0.36599800  |
| C  | -3.33368700 | -0.23989400 | -0.67315300 |
| C  | -1.72935500 | -1.87694600 | 0.27395900  |
| O  | -3.15656100 | 0.02780300  | -1.84416600 |
| O  | -1.88355900 | -2.61841300 | 1.22387900  |
| O  | -4.54830100 | -0.48677500 | -0.14118700 |
| C  | -5.65319600 | -0.41519100 | -1.06082800 |
| C  | -1.07335400 | -2.33384800 | -1.01222700 |
| Cl | 5.91473300  | -0.16570800 | -0.96283600 |
| H  | 4.53321600  | -0.85197400 | 1.45138700  |
| H  | 1.27265900  | 1.02435600  | -1.87416800 |
| H  | 3.67745800  | 0.80544600  | -2.43379500 |
| H  | -0.27830900 | -0.57061500 | 2.80717000  |
| H  | 2.16341300  | -1.08953800 | 3.00753600  |
| H  | -0.96379500 | 0.78816900  | -0.89399400 |
| H  | -1.56239100 | 1.89518400  | 1.88307500  |
| H  | -0.31551800 | 3.28432300  | -0.55459100 |
| H  | -0.68467300 | 4.04733900  | 0.99790200  |
| H  | 0.56159300  | 2.79251800  | 0.90403300  |
| H  | -3.04706900 | 3.55920500  | 0.74148400  |
| H  | -3.69369500 | 1.92677100  | 0.61192100  |
| H  | -2.88360100 | 2.67012600  | -0.78076200 |
| H  | -2.67734100 | -0.32939900 | 1.36049900  |
| H  | -6.53795400 | -0.65339300 | -0.47046300 |
| H  | -5.73115300 | 0.58876000  | -1.48600900 |
| H  | -5.52368000 | -1.13700700 | -1.87122400 |
| H  | -0.96085700 | -3.41971800 | -0.99082700 |
| H  | -1.64936900 | -2.02189600 | -1.88855900 |
| H  | -0.08179100 | -1.87441700 | -1.10055500 |

Compound **1a**, optimization level B3LYP/6-31G(d)

Conformation #99

|    |             |             |             |
|----|-------------|-------------|-------------|
| C  | -3.99574200 | -0.35055000 | -0.41889200 |
| C  | -3.73112900 | 0.24702900  | 0.80329500  |
| C  | -2.39415800 | 0.55658500  | 1.07301200  |
| C  | -1.33120800 | 0.29048700  | 0.16239200  |
| C  | -1.66037500 | -0.32013200 | -1.06390200 |
| C  | -2.98052300 | -0.63740200 | -1.34996100 |
| C  | -0.10590700 | 0.74386000  | 0.79488800  |
| C  | -0.47942800 | 1.24338500  | 2.02094400  |
| N  | -1.84445800 | 1.14130700  | 2.19160900  |
| C  | 1.32814400  | 0.72850400  | 0.30444900  |
| C  | 1.68725000  | 1.89038900  | -0.68207400 |
| C  | 0.98972000  | 1.81557300  | -2.04793700 |
| C  | 1.45513600  | 3.26009000  | -0.02782600 |
| C  | 1.73231400  | -0.66993200 | -0.25772000 |
| C  | 3.16850600  | -0.68280200 | -0.77458700 |
| C  | 1.51472400  | -1.84409300 | 0.73202300  |
| O  | 3.48323600  | -0.87568800 | -1.92727900 |
| O  | 1.01266800  | -2.87070600 | 0.32144800  |
| O  | 4.06928200  | -0.44439800 | 0.21014500  |
| C  | 5.44765700  | -0.44108300 | -0.20490900 |
| C  | 1.94169400  | -1.68884100 | 2.17862700  |
| H  | -4.52670600 | 0.45974900  | 1.50953400  |
| H  | -0.89614200 | -0.54779900 | -1.79825400 |
| H  | -3.23968200 | -1.11004100 | -2.29072500 |
| H  | 0.13754100  | 1.67861100  | 2.79579600  |
| H  | -2.35391400 | 1.42591000  | 3.01354800  |
| H  | 1.95816900  | 0.90341600  | 1.18602000  |
| H  | 2.76870000  | 1.80443700  | -0.86167900 |
| H  | 1.32295000  | 2.64515100  | -2.68232800 |
| H  | -0.09804800 | 1.89308200  | -1.94739600 |
| H  | 1.22666600  | 0.88810200  | -2.57950200 |
| H  | 1.82891700  | 4.06054800  | -0.67654600 |
| H  | 1.97605000  | 3.34099000  | 0.93464500  |
| H  | 0.38995600  | 3.44263900  | 0.15073300  |
| H  | 1.12714700  | -0.92614900 | -1.12674700 |
| H  | 5.71878700  | -1.40822100 | -0.63530500 |
| H  | 5.62040100  | 0.34078300  | -0.94881600 |
| H  | 6.02430100  | -0.24593400 | 0.69951600  |
| H  | 2.94938300  | -1.27066100 | 2.25249400  |
| H  | 1.89539900  | -2.66436300 | 2.66689800  |
| H  | 1.25587300  | -1.00242200 | 2.68894900  |
| Cl | -5.65976900 | -0.76570800 | -0.82220800 |

Compound **1a**, optimization level PCM-B3LYP/6-31G(d)

Conformation #1

|    |             |             |             |
|----|-------------|-------------|-------------|
| C  | 4.25111000  | -0.10638800 | -0.37627700 |
| C  | 3.79004500  | -0.20851600 | 0.92808100  |
| C  | 2.41006600  | -0.06476200 | 1.11190400  |
| C  | 1.50973100  | 0.17929300  | 0.03483400  |
| C  | 2.03250200  | 0.27171200  | -1.26811600 |
| C  | 3.39924000  | 0.12800200  | -1.47269300 |
| C  | 0.18057200  | 0.26410900  | 0.59614000  |
| C  | 0.33163600  | 0.06818400  | 1.95189000  |
| N  | 1.66126400  | -0.12405700 | 2.26279100  |
| C  | -1.10129900 | 0.51061300  | -0.16878200 |
| C  | -1.58488700 | 1.99950700  | -0.14512000 |
| C  | -1.98641800 | 2.50948700  | 1.24637200  |
| C  | -0.54069300 | 2.92983900  | -0.77989500 |
| C  | -2.22330900 | -0.46834100 | 0.29234900  |
| C  | -3.46498900 | -0.32273900 | -0.58281200 |
| C  | -1.77953000 | -1.95074800 | 0.27082300  |
| O  | -3.46538400 | -0.36143300 | -1.79941700 |
| O  | -1.94749600 | -2.63908400 | 1.26216100  |
| O  | -4.57077500 | -0.15975900 | 0.16018000  |
| C  | -5.81112200 | -0.03230000 | -0.56934700 |
| C  | -1.15958200 | -2.49854500 | -0.99401300 |
| Cl | 5.98688800  | -0.27911400 | -0.67963600 |
| H  | 4.46417200  | -0.39166500 | 1.75756300  |
| H  | 1.38141800  | 0.45601200  | -2.11783100 |
| H  | 3.81695300  | 0.19667400  | -2.47114100 |
| H  | -0.41078600 | 0.03707900  | 2.73666000  |
| H  | 2.01921100  | -0.30217100 | 3.18997000  |
| H  | -0.90765200 | 0.28134000  | -1.22353100 |
| H  | -2.47715700 | 2.03742400  | -0.78572600 |
| H  | -1.13923300 | 2.47755300  | 1.94096100  |
| H  | -2.32209300 | 3.55065600  | 1.17991800  |
| H  | -2.80787100 | 1.93048700  | 1.68230500  |
| H  | -0.93533100 | 3.94971100  | -0.85348800 |
| H  | -0.27078200 | 2.60178500  | -1.79062800 |
| H  | 0.37635800  | 2.96802700  | -0.18129900 |
| H  | -2.51283000 | -0.26912000 | 1.32506500  |
| H  | -6.58197300 | 0.08968100  | 0.19035600  |
| H  | -5.77588300 | 0.84009000  | -1.22564500 |
| H  | -5.99428500 | -0.93045400 | -1.16330800 |
| H  | -1.12953000 | -3.58888500 | -0.94317100 |
| H  | -1.71354900 | -2.16817900 | -1.87745000 |
| H  | -0.13429600 | -2.12095300 | -1.09074200 |

Compound **1a**, optimization level PCM-B3LYP/6-31G(d)

Conformation #4

|    |             |             |             |
|----|-------------|-------------|-------------|
| C  | -3.90709500 | -0.05252300 | -0.02940300 |
| C  | -3.32023600 | -0.39642300 | 1.17971200  |
| C  | -1.93362500 | -0.58759000 | 1.16494000  |
| C  | -1.14675000 | -0.44210600 | -0.01466700 |
| C  | -1.79532100 | -0.09028300 | -1.21240100 |
| C  | -3.17141100 | 0.10351900  | -1.21976900 |
| C  | 0.22609300  | -0.71373100 | 0.34623100  |
| C  | 0.21177800  | -1.00220600 | 1.69268900  |
| N  | -1.07600000 | -0.92986300 | 2.18269200  |
| C  | 1.40668100  | -0.69337700 | -0.60396200 |
| C  | 2.10136200  | -2.08148600 | -0.75425900 |
| C  | 1.09693300  | -3.12745400 | -1.26466900 |
| C  | 3.31767800  | -2.03357200 | -1.69303500 |
| C  | 2.40535900  | 0.48347700  | -0.32554800 |
| C  | 1.63632100  | 1.78961800  | -0.14183100 |
| C  | 3.37721800  | 0.31424200  | 0.85414500  |
| O  | 1.57612800  | 2.42673200  | 0.89250400  |
| O  | 3.22369100  | -0.53473000 | 1.71521200  |
| O  | 1.01785200  | 2.14903700  | -1.27772000 |
| C  | 0.21395600  | 3.34626700  | -1.20959100 |
| C  | 4.57504500  | 1.24151000  | 0.86613200  |
| Cl | -5.65945000 | 0.20453700  | -0.08116200 |
| H  | -3.90710900 | -0.50980100 | 2.08476600  |
| H  | -1.23293600 | 0.03638100  | -2.13304400 |
| H  | -3.68485900 | 0.37525600  | -2.13567600 |
| H  | 1.03456900  | -1.24500800 | 2.34696300  |
| H  | -1.33803300 | -1.08931700 | 3.14459700  |
| H  | 0.99983100  | -0.45449100 | -1.59475000 |
| H  | 2.44589900  | -2.39421400 | 0.23760800  |
| H  | 0.23003600  | -3.21429500 | -0.60283100 |
| H  | 0.73207100  | -2.86522200 | -2.26666900 |
| H  | 1.57225500  | -4.11286400 | -1.33143900 |
| H  | 3.72038900  | -3.04199000 | -1.84160300 |
| H  | 4.13337100  | -1.41736500 | -1.29982200 |
| H  | 3.04232300  | -1.63903700 | -2.68028200 |
| H  | 3.01812300  | 0.61695100  | -1.22585200 |
| H  | 0.83123400  | 4.20120100  | -0.92507000 |
| H  | -0.18969700 | 3.48109200  | -2.21226300 |
| H  | -0.59321800 | 3.21793500  | -0.48520900 |
| H  | 4.25872500  | 2.28573100  | 0.77899100  |
| H  | 5.14308700  | 1.10131900  | 1.78794900  |
| H  | 5.22129900  | 1.02404000  | 0.00628900  |

Compound **1a**, optimization level PCM-B3LYP/6-31G(d)

Conformation #6

|    |             |             |             |
|----|-------------|-------------|-------------|
| C  | 4.17285600  | -0.17656500 | -0.46861800 |
| C  | 3.77938700  | -0.10645200 | 0.85975800  |
| C  | 2.41127000  | 0.07394000  | 1.09345700  |
| C  | 1.45717600  | 0.18634100  | 0.04118700  |
| C  | 1.91239200  | 0.10618100  | -1.28771200 |
| C  | 3.26627700  | -0.07570400 | -1.54134300 |
| C  | 0.15893300  | 0.35508900  | 0.65368200  |
| C  | 0.37955700  | 0.33459100  | 2.01407000  |
| N  | 1.72291600  | 0.17070800  | 2.27889100  |
| C  | -1.16093400 | 0.51193700  | -0.07070000 |
| C  | -1.63951800 | 1.99544300  | -0.21486100 |
| C  | -1.98564700 | 2.67585500  | 1.11735500  |
| C  | -0.62091200 | 2.83254300  | -1.00218800 |
| C  | -2.25191800 | -0.38869600 | 0.58345700  |
| C  | -3.61084300 | -0.26368200 | -0.10369100 |
| C  | -1.85257300 | -1.88200500 | 0.67678700  |
| O  | -4.63461400 | 0.05949700  | 0.46481200  |
| O  | -2.05848800 | -2.48139900 | 1.71808400  |
| O  | -3.54784100 | -0.55864300 | -1.41484200 |
| C  | -4.79006300 | -0.47091500 | -2.14638600 |
| C  | -1.23275600 | -2.56023900 | -0.52404100 |
| Cl | 5.88991800  | -0.40403100 | -0.83508100 |
| H  | 4.49469100  | -0.18929600 | 1.67067100  |
| H  | 1.21901500  | 0.18692900  | -2.11993300 |
| H  | 3.63212600  | -0.13912000 | -2.56028000 |
| H  | -0.31998600 | 0.41597700  | 2.83385700  |
| H  | 2.12897300  | 0.11486300  | 3.20163500  |
| H  | -1.01908500 | 0.14760800  | -1.09494000 |
| H  | -2.55744500 | 1.96011200  | -0.81893800 |
| H  | -1.11370900 | 2.71783700  | 1.78009700  |
| H  | -2.31489700 | 3.70542400  | 0.93651100  |
| H  | -2.79540900 | 2.16311900  | 1.64750700  |
| H  | -1.01742800 | 3.83737300  | -1.18745900 |
| H  | -0.39184800 | 2.37888200  | -1.97372300 |
| H  | 0.31935400  | 2.93995400  | -0.44990700 |
| H  | -2.43009900 | -0.08073500 | 1.61499600  |
| H  | -4.54247200 | -0.74480500 | -3.17099800 |
| H  | -5.52409300 | -1.16351500 | -1.72883000 |
| H  | -5.18145800 | 0.54784000  | -2.10400200 |
| H  | -1.79818100 | -2.34309200 | -1.43458200 |
| H  | -0.21301100 | -2.18616000 | -0.67425300 |
| H  | -1.19262900 | -3.63722600 | -0.34898600 |



Compound **1a**, optimization level PCM-B3LYP/6-31G(d)

Conformation #7

|    |             |             |             |
|----|-------------|-------------|-------------|
| C  | -3.98832200 | -0.34767700 | -0.43242900 |
| C  | -3.73724000 | 0.24841200  | 0.79370500  |
| C  | -2.40441600 | 0.57655400  | 1.06697300  |
| C  | -1.33503900 | 0.33047200  | 0.15220200  |
| C  | -1.65604200 | -0.27734600 | -1.07864200 |
| C  | -2.97234400 | -0.61542600 | -1.36799000 |
| C  | -0.11849100 | 0.79570900  | 0.79004000  |
| C  | -0.50283400 | 1.27901700  | 2.01966800  |
| N  | -1.86405500 | 1.15859200  | 2.18773000  |
| C  | 1.32229700  | 0.77210300  | 0.32010100  |
| C  | 1.69716500  | 1.88082700  | -0.71452400 |
| C  | 1.02111600  | 1.74711600  | -2.08704000 |
| C  | 1.45625500  | 3.27942800  | -0.12756900 |
| C  | 1.72895500  | -0.65912700 | -0.13893100 |
| C  | 3.14263700  | -0.72730000 | -0.71742200 |
| C  | 1.64260400  | -1.67470000 | 1.02680800  |
| O  | 3.40576600  | -1.11729300 | -1.83838900 |
| O  | 1.88769600  | -1.34846100 | 2.17265200  |
| O  | 4.06600500  | -0.31864700 | 0.16815200  |
| C  | 5.43613300  | -0.34584800 | -0.28591000 |
| C  | 1.25187300  | -3.08390400 | 0.64612700  |
| Cl | -5.65311700 | -0.79059500 | -0.84070500 |
| H  | -4.53274900 | 0.44716000  | 1.50376000  |
| H  | -0.89075500 | -0.48154500 | -1.81951500 |
| H  | -3.22259600 | -1.08294200 | -2.31400600 |
| H  | 0.10750000  | 1.70049600  | 2.80644000  |
| H  | -2.37655900 | 1.43893200  | 3.01110600  |
| H  | 1.93370200  | 0.97474900  | 1.20619400  |
| H  | 2.78099700  | 1.78760900  | -0.87237800 |
| H  | -0.06528600 | 1.86343900  | -2.01182200 |
| H  | 1.39075100  | 2.52727600  | -2.76279000 |
| H  | 1.23234200  | 0.78136900  | -2.55973600 |
| H  | 1.83713900  | 4.04957900  | -0.80822100 |
| H  | 1.96387100  | 3.40187000  | 0.83687400  |
| H  | 0.38827400  | 3.46706600  | 0.02972200  |
| H  | 1.08315000  | -1.01261400 | -0.94448100 |
| H  | 6.02818200  | 0.00144100  | 0.55978600  |
| H  | 5.72216500  | -1.36235300 | -0.56490200 |
| H  | 5.56394300  | 0.31896600  | -1.14320600 |
| H  | 1.84861700  | -3.43579300 | -0.20379300 |
| H  | 1.37383900  | -3.75715300 | 1.49690900  |
| H  | 0.20327900  | -3.09223700 | 0.32161400  |

Compound **1a**, optimization level PCM-B3LYP/6-31G(d)

Conformation #8

|    |             |             |             |
|----|-------------|-------------|-------------|
| C  | 3.95598600  | 0.00585100  | -0.12410600 |
| C  | 3.36366900  | -0.06107200 | 1.12858500  |
| C  | 1.98162900  | 0.15640300  | 1.17458700  |
| C  | 1.20475000  | 0.43243300  | 0.01190700  |
| C  | 1.85823600  | 0.48603000  | -1.23242100 |
| C  | 3.22986600  | 0.27408600  | -1.30026100 |
| C  | -0.16602300 | 0.59972700  | 0.43827900  |
| C  | -0.16033700 | 0.42071300  | 1.80368300  |
| N  | 1.12011200  | 0.15747500  | 2.24550100  |
| C  | -1.33409200 | 0.93625000  | -0.46758800 |
| C  | -1.97435100 | 2.32329200  | -0.15648500 |
| C  | -0.92537000 | 3.43879500  | -0.29336900 |
| C  | -3.17842000 | 2.63499500  | -1.06020500 |
| C  | -2.38107600 | -0.22354000 | -0.59298300 |
| C  | -1.63596900 | -1.51538500 | -0.93429300 |
| C  | -3.36203600 | -0.41283900 | 0.57305800  |
| O  | -1.03348400 | -1.68753200 | -1.97407900 |
| O  | -3.17858700 | 0.07185500  | 1.67713900  |
| O  | -1.70226600 | -2.42432600 | 0.05275800  |
| C  | -0.99635100 | -3.66379900 | -0.17407300 |
| C  | -4.62291000 | -1.19355700 | 0.25823400  |
| Cl | 5.70316800  | -0.25963600 | -0.25344000 |
| H  | 3.94320200  | -0.27060000 | 2.02110400  |
| H  | 1.30270800  | 0.68585800  | -2.14423100 |
| H  | 3.74701600  | 0.31168000  | -2.25288100 |
| H  | -0.98539500 | 0.45009200  | 2.49809100  |
| H  | 1.37545400  | -0.01687000 | 3.20675800  |
| H  | -0.92306800 | 1.01287200  | -1.48275700 |
| H  | -2.32103800 | 2.30623000  | 0.88298000  |
| H  | -0.55685000 | 3.50626900  | -1.32556900 |
| H  | -1.36344400 | 4.40914900  | -0.03276700 |
| H  | -0.06492700 | 3.26951200  | 0.36082700  |
| H  | -3.53864900 | 3.65274900  | -0.87172500 |
| H  | -4.02391400 | 1.95949900  | -0.89037600 |
| H  | -2.90456800 | 2.57288600  | -2.12192100 |
| H  | -2.98943000 | -0.02132200 | -1.48290200 |
| H  | -1.17182200 | -4.26401600 | 0.71766600  |
| H  | -1.38939400 | -4.16646000 | -1.06042000 |
| H  | 0.07036000  | -3.46943500 | -0.30418400 |
| H  | -4.40025000 | -2.11385900 | -0.29037700 |
| H  | -5.15457800 | -1.42881200 | 1.18249700  |
| H  | -5.27456900 | -0.58422600 | -0.38168400 |

Compound **1a**, optimization level PCM-B3LYP/6-31G(d)

## Conformation #9

|    |             |             |             |
|----|-------------|-------------|-------------|
| C  | -4.36580900 | -0.22175000 | -0.36311300 |
| C  | -3.91441600 | 0.59823400  | 0.66119900  |
| C  | -2.52985500 | 0.63423400  | 0.86295200  |
| C  | -1.61765800 | -0.12056900 | 0.07091900  |
| C  | -2.12972800 | -0.93506400 | -0.95477500 |
| C  | -3.50148800 | -0.98485200 | -1.17131200 |
| C  | -0.28711900 | 0.16936400  | 0.55394300  |
| C  | -0.44769000 | 1.06001400  | 1.59197400  |
| N  | -1.78636600 | 1.33904400  | 1.77941200  |
| C  | 0.98799500  | -0.45424000 | 0.02892500  |
| C  | 1.20968100  | -1.86488500 | 0.68221100  |
| C  | 2.16966400  | -2.77637600 | -0.10080300 |
| C  | 1.61294400  | -1.80113300 | 2.16263600  |
| C  | 2.19626500  | 0.51900300  | 0.17087700  |
| C  | 3.41767100  | 0.03667200  | -0.60648100 |
| C  | 1.87889800  | 1.95506300  | -0.32164900 |
| O  | 3.42664600  | -0.22471800 | -1.79468200 |
| O  | 2.13396600  | 2.90091500  | 0.40362300  |
| O  | 4.50417900  | -0.02968300 | 0.18099000  |
| C  | 5.73191600  | -0.43036700 | -0.46667300 |
| C  | 1.28751800  | 2.13293200  | -1.70068200 |
| Cl | -6.10701800 | -0.31430300 | -0.67095600 |
| H  | -4.59995300 | 1.17792400  | 1.26965400  |
| H  | -1.46669500 | -1.52583800 | -1.58067600 |
| H  | -3.91325100 | -1.60729600 | -1.95814300 |
| H  | 0.29169900  | 1.53967400  | 2.21697400  |
| H  | -2.15220500 | 1.98097900  | 2.46735400  |
| H  | 0.85191600  | -0.63006500 | -1.04586200 |
| H  | 0.21985200  | -2.33862600 | 0.63460600  |
| H  | 3.21603900  | -2.47452200 | 0.01659000  |
| H  | 2.09135400  | -3.80321600 | 0.27497100  |
| H  | 1.93702100  | -2.79024500 | -1.17126100 |
| H  | 1.58175200  | -2.80362700 | 2.60427800  |
| H  | 0.93814900  | -1.16033500 | 2.74005600  |
| H  | 2.63483100  | -1.42290000 | 2.28697000  |
| H  | 2.48361300  | 0.62900600  | 1.21767400  |
| H  | 6.49002700  | -0.41167000 | 0.31508900  |
| H  | 5.63121400  | -1.43628800 | -0.88051800 |
| H  | 5.98366200  | 0.27074600  | -1.26535900 |
| H  | 1.85127000  | 1.55516000  | -2.43886000 |
| H  | 0.25746500  | 1.75816900  | -1.71146100 |
| H  | 1.28504000  | 3.19301800  | -1.96202900 |

Compound **1a**, optimization level PCM-B3LYP/6-31G(d)

## Conformation #16

|    |             |             |             |
|----|-------------|-------------|-------------|
| C  | 4.19405800  | -0.17629600 | -0.46780600 |
| C  | 3.80081600  | -0.13328900 | 0.86167200  |
| C  | 2.43320100  | 0.04921500  | 1.09864200  |
| C  | 1.48045400  | 0.18865600  | 0.04855400  |
| C  | 1.93528900  | 0.13342200  | -1.28100100 |
| C  | 3.28835500  | -0.04829800 | -1.53861900 |
| C  | 0.18304300  | 0.35332300  | 0.66124700  |
| C  | 0.40115800  | 0.30406100  | 2.02104800  |
| N  | 1.74427500  | 0.12405200  | 2.28506800  |
| C  | -1.13211000 | 0.53604400  | -0.06720600 |
| C  | -1.64421200 | 2.01193500  | -0.09830200 |
| C  | -2.03737900 | 2.57357100  | 1.27607300  |
| C  | -0.62920900 | 2.93377200  | -0.79023000 |
| C  | -2.19071000 | -0.45788700 | 0.48632400  |
| C  | -3.58272500 | -0.26894200 | -0.11834300 |
| C  | -1.76792200 | -1.92783700 | 0.24644300  |
| O  | -4.59053200 | -0.06499500 | 0.53021900  |
| O  | -1.10723700 | -2.24870300 | -0.72312000 |
| O  | -3.56330100 | -0.37619500 | -1.45696400 |
| C  | -4.83333100 | -0.21672600 | -2.12483600 |
| C  | -2.23860600 | -2.92579300 | 1.27879000  |
| Cl | 5.91093800  | -0.40414500 | -0.83889700 |
| H  | 4.51562800  | -0.23734800 | 1.67063900  |
| H  | 1.24069600  | 0.23032300  | -2.11044900 |
| H  | 3.65439400  | -0.09304400 | -2.55853700 |
| H  | -0.29731100 | 0.37781500  | 2.84267500  |
| H  | 2.14945100  | 0.05273600  | 3.20697900  |
| H  | -0.96752100 | 0.24369400  | -1.10946200 |
| H  | -2.54734800 | 2.00625300  | -0.72484000 |
| H  | -1.17773300 | 2.60143100  | 1.95528700  |
| H  | -2.40795800 | 3.59965500  | 1.16962800  |
| H  | -2.83150200 | 1.98718600  | 1.75127800  |
| H  | -1.04495600 | 3.94151200  | -0.90462900 |
| H  | -0.36621400 | 2.56384400  | -1.78835600 |
| H  | 0.29519700  | 3.01661600  | -0.20757000 |
| H  | -2.33167500 | -0.31660100 | 1.56046700  |
| H  | -4.62019500 | -0.34158500 | -3.18562300 |
| H  | -5.53889600 | -0.97654600 | -1.78156300 |
| H  | -5.24164600 | 0.77737600  | -1.92918000 |
| H  | -3.30066800 | -2.77943100 | 1.50730900  |
| H  | -2.06263900 | -3.94604100 | 0.93218000  |
| H  | -1.68743800 | -2.76019100 | 2.21375800  |

Compound **1a**, optimization level PCM-B3LYP/6-31G(d)

Conformation #19

|    |             |             |             |
|----|-------------|-------------|-------------|
| C  | -3.88806300 | -0.59674600 | -0.42554800 |
| C  | -3.73828200 | 0.34092100  | 0.58447800  |
| C  | -2.44078700 | 0.81503100  | 0.80876800  |
| C  | -1.30876200 | 0.38303500  | 0.05206800  |
| C  | -1.52707300 | -0.57163700 | -0.96221400 |
| C  | -2.80680800 | -1.05924900 | -1.19776800 |
| C  | -0.15484700 | 1.08502500  | 0.58024200  |
| C  | -0.63353200 | 1.87606100  | 1.59944700  |
| N  | -1.99538900 | 1.72579800  | 1.73540300  |
| C  | 1.31078700  | 1.01615300  | 0.19842900  |
| C  | 1.69194800  | 1.80494400  | -1.09537600 |
| C  | 1.09758300  | 1.24777000  | -2.39724200 |
| C  | 1.35388700  | 3.29559200  | -0.94394300 |
| C  | 1.81598400  | -0.45458100 | 0.18978600  |
| C  | 3.31405000  | -0.54654300 | -0.09140500 |
| C  | 1.59442900  | -1.11994300 | 1.57358100  |
| O  | 4.15984100  | 0.18118200  | 0.38865700  |
| O  | 1.87896300  | -0.52981700 | 2.59860300  |
| O  | 3.58753500  | -1.57143300 | -0.91887500 |
| C  | 4.98383000  | -1.78496800 | -1.21969700 |
| C  | 1.03634400  | -2.52219900 | 1.56088200  |
| Cl | -5.50301600 | -1.24011700 | -0.75979000 |
| H  | -4.58279400 | 0.68615800  | 1.17097700  |
| H  | -0.71026000 | -0.93214000 | -1.57798700 |
| H  | -2.97842900 | -1.79339900 | -1.97731100 |
| H  | -0.09135700 | 2.54276600  | 2.25579300  |
| H  | -2.56815500 | 2.19611100  | 2.42095800  |
| H  | 1.86339900  | 1.49876000  | 1.01238100  |
| H  | 2.78448300  | 1.73359600  | -1.17464800 |
| H  | 0.00462800  | 1.31887800  | -2.40340700 |
| H  | 1.47082000  | 1.82161900  | -3.25354400 |
| H  | 1.37322700  | 0.20015800  | -2.56562100 |
| H  | 1.73452900  | 3.86198400  | -1.80181400 |
| H  | 1.80306500  | 3.71757900  | -0.03672100 |
| H  | 0.27142000  | 3.45638400  | -0.88786500 |
| H  | 1.30241400  | -1.05270500 | -0.56431700 |
| H  | 5.00823700  | -2.64587400 | -1.88649000 |
| H  | 5.40271900  | -0.90478500 | -1.71262500 |
| H  | 5.54167800  | -1.99135100 | -0.30351700 |
| H  | 0.02432500  | -2.50831900 | 1.13706900  |
| H  | 1.64335000  | -3.16377900 | 0.91078900  |
| H  | 1.00684500  | -2.93169700 | 2.57250700  |

Compound **1a**, optimization level PCM-B3LYP/6-31G(d)

Conformation #33

|    |             |             |             |
|----|-------------|-------------|-------------|
| C  | -4.12972200 | -0.07889200 | -0.43628400 |
| C  | -3.67689100 | 0.61890200  | 0.67429900  |
| C  | -2.31870700 | 0.48046400  | 0.98297500  |
| C  | -1.43459900 | -0.33081400 | 0.21460500  |
| C  | -1.94672800 | -1.01508400 | -0.90223200 |
| C  | -3.29220800 | -0.88943300 | -1.22654100 |
| C  | -0.12922300 | -0.24254200 | 0.82435500  |
| C  | -0.27203000 | 0.60019100  | 1.90274800  |
| N  | -1.57993900 | 1.03410900  | 2.00083500  |
| C  | 1.13302900  | -0.89662300 | 0.30490800  |
| C  | 2.06921700  | -1.39327600 | 1.44487300  |
| C  | 1.34529900  | -2.44758600 | 2.30193700  |
| C  | 3.40127200  | -1.97694300 | 0.94849500  |
| C  | 1.78123500  | 0.04784200  | -0.77274700 |
| C  | 2.44477000  | 1.27449900  | -0.16735900 |
| C  | 2.65445400  | -0.69856800 | -1.80605100 |
| O  | 3.45878300  | 1.27012600  | 0.50706000  |
| O  | 2.36434300  | -1.83719900 | -2.12911700 |
| O  | 1.76094000  | 2.39520100  | -0.46000000 |
| C  | 2.29229000  | 3.62110500  | 0.08536800  |
| C  | 3.78208900  | 0.05648100  | -2.47239700 |
| Cl | -5.83861800 | 0.05407900  | -0.88299200 |
| H  | -4.34162900 | 1.23718700  | 1.26762600  |
| H  | -1.30332400 | -1.64067500 | -1.51494000 |
| H  | -3.70406300 | -1.41052000 | -2.08388000 |
| H  | 0.45691800  | 0.93184100  | 2.62884100  |
| H  | -1.93629300 | 1.64185800  | 2.72396500  |
| H  | 0.83974800  | -1.78075600 | -0.27441800 |
| H  | 2.30992800  | -0.53620100 | 2.08731800  |
| H  | 1.10834400  | -3.33670000 | 1.70289700  |
| H  | 1.98564300  | -2.76817600 | 3.13173300  |
| H  | 0.41074200  | -2.06657600 | 2.72280400  |
| H  | 3.98625700  | -2.33775200 | 1.80286800  |
| H  | 4.00880100  | -1.22813800 | 0.43332300  |
| H  | 3.24050600  | -2.82308800 | 0.27126700  |
| H  | 0.94881200  | 0.41959700  | -1.38459500 |
| H  | 1.61797700  | 4.40599900  | -0.25493700 |
| H  | 2.30847900  | 3.57463200  | 1.17664400  |
| H  | 3.30428600  | 3.79508700  | -0.28737200 |
| H  | 4.20886000  | -0.54860600 | -3.27424700 |
| H  | 3.41437700  | 1.00662700  | -2.87963300 |
| H  | 4.55789600  | 0.30289000  | -1.73949300 |

Compound **1a**, optimization level PCM-B3LYP/6-31G(d)

## Conformation #35

|    |             |             |             |
|----|-------------|-------------|-------------|
| C  | 4.25927500  | -0.17961800 | -0.36382000 |
| C  | 3.79460700  | -0.21684500 | 0.94259800  |
| C  | 2.41845500  | -0.02832800 | 1.11727300  |
| C  | 1.52662700  | 0.19426700  | 0.02875300  |
| C  | 2.05249600  | 0.21849300  | -1.27530500 |
| C  | 3.41524800  | 0.03231900  | -1.47110800 |
| C  | 0.19967200  | 0.33906200  | 0.57988500  |
| C  | 0.34205200  | 0.19765600  | 1.94342600  |
| N  | 1.66642200  | -0.02014300 | 2.26721700  |
| C  | -1.07091000 | 0.59006300  | -0.20510800 |
| C  | -1.56788100 | 2.07067000  | -0.15567500 |
| C  | -2.02974600 | 2.53720700  | 1.23287800  |
| C  | -0.50686100 | 3.02681700  | -0.72081300 |
| C  | -2.16720500 | -0.42870600 | 0.20627900  |
| C  | -3.45140200 | -0.25603300 | -0.60273600 |
| C  | -1.69367900 | -1.88378000 | -0.04566000 |
| O  | -3.49600200 | -0.06228000 | -1.80121200 |
| O  | -1.06216800 | -2.16871800 | -1.04554700 |
| O  | -4.53884700 | -0.38339000 | 0.17865300  |
| C  | -5.81438200 | -0.28538600 | -0.49211900 |
| C  | -2.08295400 | -2.90415900 | 0.99662600  |
| Cl | 5.99086500  | -0.41040300 | -0.65625900 |
| H  | 4.46294500  | -0.38502200 | 1.77995100  |
| H  | 1.40546000  | 0.38068900  | -2.13253700 |
| H  | 3.83606200  | 0.04833800  | -2.47052900 |
| H  | -0.40005000 | 0.23017300  | 2.72869900  |
| H  | 2.01899300  | -0.15832600 | 3.20310100  |
| H  | -0.85378600 | 0.37264900  | -1.25626500 |
| H  | -2.43401000 | 2.11978700  | -0.82833700 |
| H  | -1.20717600 | 2.51191000  | 1.95674400  |
| H  | -2.39160200 | 3.57052500  | 1.17995300  |
| H  | -2.84953400 | 1.92552000  | 1.62679500  |
| H  | -0.90645200 | 4.04561000  | -0.78408500 |
| H  | -0.19208600 | 2.72703000  | -1.72746900 |
| H  | 0.38461400  | 3.05559900  | -0.08398400 |
| H  | -2.42496400 | -0.33079800 | 1.26311900  |
| H  | -6.56274300 | -0.42304800 | 0.28720200  |
| H  | -5.92108300 | 0.69657500  | -0.95846100 |
| H  | -5.90299800 | -1.06370100 | -1.25332700 |
| H  | -3.15447200 | -2.83461900 | 1.21746700  |
| H  | -1.83048100 | -3.91124900 | 0.65894300  |
| H  | -1.55062700 | -2.68687600 | 1.93150400  |

Compound **1a**, optimization level PCM-B3LYP/6-31G(d)

Conformation #46

|    |             |             |             |
|----|-------------|-------------|-------------|
| C  | -3.91117300 | -0.59528500 | -0.39061900 |
| C  | -3.74742100 | 0.41820100  | 0.54053000  |
| C  | -2.43957800 | 0.87430000  | 0.74182200  |
| C  | -1.31261400 | 0.34949100  | 0.04031700  |
| C  | -1.54407500 | -0.68090800 | -0.89264700 |
| C  | -2.83391200 | -1.14997600 | -1.10621700 |
| C  | -0.14582700 | 1.06239700  | 0.52311500  |
| C  | -0.61399800 | 1.95214000  | 1.46489000  |
| N  | -1.98015600 | 1.84873000  | 1.59456200  |
| C  | 1.31722200  | 0.94168000  | 0.14813900  |
| C  | 1.71415400  | 1.66287600  | -1.18331600 |
| C  | 1.08978700  | 1.06880900  | -2.45410400 |
| C  | 1.42683700  | 3.16895500  | -1.09473000 |
| C  | 1.80896600  | -0.53995100 | 0.18068200  |
| C  | 3.31881000  | -0.61128700 | -0.02956700 |
| C  | 1.45380800  | -1.25978100 | 1.50347200  |
| O  | 4.14169000  | 0.02812000  | 0.59935900  |
| O  | 0.82884100  | -2.30498300 | 1.46490500  |
| O  | 3.63461700  | -1.48713900 | -0.99658000 |
| C  | 5.04412100  | -1.65023200 | -1.26775700 |
| C  | 1.89622800  | -0.63595300 | 2.80741400  |
| Cl | -5.53938800 | -1.21972000 | -0.69421500 |
| H  | -4.58829400 | 0.83388200  | 1.08479400  |
| H  | -0.72872700 | -1.11777200 | -1.45838300 |
| H  | -3.01700300 | -1.94262400 | -1.82334400 |
| H  | -0.06290000 | 2.66662000  | 2.06116300  |
| H  | -2.54807300 | 2.39088500  | 2.22933500  |
| H  | 1.88283900  | 1.46255000  | 0.93034200  |
| H  | 2.80444100  | 1.55335400  | -1.26763300 |
| H  | -0.00151000 | 1.16114100  | -2.44506000 |
| H  | 1.46038600  | 1.60427100  | -3.33584100 |
| H  | 1.34333800  | 0.01129500  | -2.58804400 |
| H  | 1.81975800  | 3.68347200  | -1.97914000 |
| H  | 1.89644100  | 3.61561200  | -0.20999200 |
| H  | 0.35070000  | 3.36750300  | -1.04020500 |
| H  | 1.33457300  | -1.12948000 | -0.60360900 |
| H  | 5.10136100  | -2.39146000 | -2.06371400 |
| H  | 5.47883000  | -0.70224300 | -1.59253100 |
| H  | 5.56268800  | -2.00367500 | -0.37380400 |
| H  | 2.91896500  | -0.25558300 | 2.73812700  |
| H  | 1.24418200  | 0.21571900  | 3.03625200  |
| H  | 1.80947700  | -1.37017600 | 3.61099000  |



Compound **1a**, optimization level PCM-B3LYP/6-31G(d)

## Conformation #59

|    |             |             |             |
|----|-------------|-------------|-------------|
| C  | 4.20747500  | -0.09447200 | -0.50688900 |
| C  | 3.81995200  | -0.33575400 | 0.80328200  |
| C  | 2.45952600  | -0.17197500 | 1.08861300  |
| C  | 1.50735200  | 0.21999500  | 0.10287700  |
| C  | 1.95648000  | 0.45278700  | -1.20995400 |
| C  | 3.30313200  | 0.29490100  | -1.51362600 |
| C  | 0.21900300  | 0.28242900  | 0.75169200  |
| C  | 0.44074100  | -0.06104000 | 2.06671100  |
| N  | 1.77771700  | -0.33277200 | 2.27110600  |
| C  | -1.09994100 | 0.68204400  | 0.12168500  |
| C  | -1.53048800 | 2.10650400  | 0.60851200  |
| C  | -0.46952300 | 3.15442000  | 0.23437500  |
| C  | -2.90385200 | 2.56863500  | 0.09541700  |
| C  | -2.20866400 | -0.38742400 | 0.38940200  |
| C  | -3.33843600 | -0.31934200 | -0.63584100 |
| C  | -1.68330400 | -1.84733500 | 0.38013000  |
| O  | -3.18901400 | -0.12211100 | -1.82673200 |
| O  | -1.84740800 | -2.54748800 | 1.36351600  |
| O  | -4.52874600 | -0.56836200 | -0.06394700 |
| C  | -5.66605200 | -0.59090900 | -0.95393400 |
| C  | -1.00758100 | -2.36352200 | -0.87039300 |
| Cl | 5.91500100  | -0.28344900 | -0.93574700 |
| H  | 4.53489800  | -0.63434400 | 1.56222900  |
| H  | 1.26349000  | 0.75671000  | -1.98944200 |
| H  | 3.66508000  | 0.47049600  | -2.52075200 |
| H  | -0.25604200 | -0.14325500 | 2.88922800  |
| H  | 2.18202300  | -0.62185700 | 3.14993700  |
| H  | -0.96142000 | 0.72681900  | -0.96547400 |
| H  | -1.58366300 | 2.05674900  | 1.70618500  |
| H  | -0.38046600 | 3.24626400  | -0.85597100 |
| H  | -0.75150600 | 4.13756800  | 0.62805100  |
| H  | 0.51683100  | 2.90114800  | 0.63300500  |
| H  | -3.10643600 | 3.58547300  | 0.45084600  |
| H  | -3.72334700 | 1.93745300  | 0.45370100  |
| H  | -2.93728000 | 2.58579600  | -1.00008600 |
| H  | -2.63869900 | -0.24808200 | 1.38448200  |
| H  | -6.52289500 | -0.82172100 | -0.32237400 |
| H  | -5.79153400 | 0.38382300  | -1.43072600 |
| H  | -5.53303200 | -1.35885300 | -1.71913500 |
| H  | -0.87024300 | -3.44369700 | -0.78972300 |
| H  | -1.59033900 | -2.11849800 | -1.76329500 |
| H  | -0.02803100 | -1.88592800 | -0.98578600 |

Compound **1a**, optimization level PCM-B3LYP/6-31G(d)

Conformation #99

|    |             |             |             |
|----|-------------|-------------|-------------|
| C  | -3.99138400 | -0.32680100 | -0.41175000 |
| C  | -3.71948000 | 0.24826100  | 0.81964100  |
| C  | -2.37903100 | 0.55389300  | 1.08264400  |
| C  | -1.32357300 | 0.30300700  | 0.15442500  |
| C  | -1.66485700 | -0.28308800 | -1.08106400 |
| C  | -2.98870500 | -0.59628800 | -1.36150800 |
| C  | -0.09374200 | 0.74217800  | 0.78556800  |
| C  | -0.45921500 | 1.21994500  | 2.02483000  |
| N  | -1.81942000 | 1.11581900  | 2.20465100  |
| C  | 1.33902100  | 0.72426600  | 0.29128400  |
| C  | 1.70630800  | 1.88217100  | -0.69558500 |
| C  | 0.99410100  | 1.82590900  | -2.05477500 |
| C  | 1.49940400  | 3.25191000  | -0.03286500 |
| C  | 1.73312600  | -0.67685100 | -0.27375100 |
| C  | 3.18128800  | -0.72877700 | -0.75822100 |
| C  | 1.46287300  | -1.83799600 | 0.71420000  |
| O  | 3.50886000  | -1.06201100 | -1.87972700 |
| O  | 0.84691600  | -2.81325900 | 0.32029500  |
| O  | 4.05771000  | -0.36941900 | 0.19705100  |
| C  | 5.45218000  | -0.39476100 | -0.17836400 |
| C  | 1.96556100  | -1.73567000 | 2.13661200  |
| H  | -4.50449200 | 0.44901400  | 1.54066200  |
| H  | -0.90952100 | -0.49123100 | -1.83066000 |
| H  | -3.25553100 | -1.04729000 | -2.31096900 |
| H  | 0.16271000  | 1.63619800  | 2.80561600  |
| H  | -2.31936800 | 1.39329900  | 3.03674900  |
| H  | 1.97066900  | 0.89321200  | 1.17159900  |
| H  | 2.78464900  | 1.78248900  | -0.88463000 |
| H  | 1.34740600  | 2.64339400  | -2.69382300 |
| H  | -0.08980300 | 1.93733400  | -1.94398800 |
| H  | 1.19092700  | 0.88950600  | -2.58842100 |
| H  | 1.87689300  | 4.04949200  | -0.68296600 |
| H  | 2.03062000  | 3.31895600  | 0.92427500  |
| H  | 0.43826900  | 3.44688900  | 0.15782800  |
| H  | 1.13787700  | -0.91837600 | -1.15415200 |
| H  | 5.74363500  | -1.40256200 | -0.48179900 |
| H  | 5.63396100  | 0.30260000  | -0.99908400 |
| H  | 5.99740100  | -0.08861800 | 0.71335300  |
| H  | 3.00211000  | -1.39014900 | 2.16889100  |
| H  | 1.87106600  | -2.70837700 | 2.62349500  |
| H  | 1.35823800  | -1.00483700 | 2.68366600  |
| Cl | -5.66605400 | -0.73953100 | -0.80924000 |

Compound **1a**, optimization level B3LYP/6-311++G(2d,p)

Conformation #1

|    |             |             |             |
|----|-------------|-------------|-------------|
| C  | 4.24681300  | -0.06489400 | -0.40071200 |
| C  | 3.78068400  | -0.37681700 | 0.86166800  |
| C  | 2.40719200  | -0.25653700 | 1.06869400  |
| C  | 1.51240500  | 0.16806800  | 0.05404300  |
| C  | 2.03628000  | 0.47140500  | -1.21051800 |
| C  | 3.39658400  | 0.35335100  | -1.43466500 |
| C  | 0.18427900  | 0.16073100  | 0.61886400  |
| C  | 0.32802200  | -0.26238800 | 1.91449500  |
| N  | 1.65758700  | -0.50259400 | 2.19398400  |
| C  | -1.09544600 | 0.52870500  | -0.09281500 |
| C  | -1.53575800 | 2.01430600  | 0.11643300  |
| C  | -1.80576400 | 2.38957100  | 1.57771800  |
| C  | -0.53018900 | 2.98754900  | -0.50892800 |
| C  | -2.24670400 | -0.45366100 | 0.25976900  |
| C  | -3.45719300 | -0.21003900 | -0.63098900 |
| C  | -1.85093700 | -1.94539800 | 0.13029100  |
| O  | -3.42374500 | -0.13057200 | -1.83579300 |
| O  | -2.07343500 | -2.69685900 | 1.05141000  |
| O  | -4.58871300 | -0.12036800 | 0.08890700  |
| C  | -5.80117100 | 0.05974000  | -0.66951600 |
| C  | -1.21086900 | -2.41289200 | -1.15314300 |
| Cl | 5.97143000  | -0.19807000 | -0.72808700 |
| H  | 4.45650600  | -0.70031300 | 1.64234800  |
| H  | 1.39068400  | 0.79952200  | -2.01584900 |
| H  | 3.81636700  | 0.58264100  | -2.40452600 |
| H  | -0.41961500 | -0.43627800 | 2.67114200  |
| H  | 2.00671500  | -0.87341000 | 3.06106900  |
| H  | -0.91903900 | 0.42013400  | -1.16640100 |
| H  | -2.47484100 | 2.13107300  | -0.43616200 |
| H  | -0.89527800 | 2.32287900  | 2.17770300  |
| H  | -2.16521300 | 3.41962900  | 1.63726200  |
| H  | -2.56549600 | 1.75622500  | 2.04073600  |
| H  | -0.89251800 | 4.01498700  | -0.42466000 |
| H  | -0.37698100 | 2.77731500  | -1.57025200 |
| H  | 0.44037900  | 2.93594100  | -0.01046600 |
| H  | -2.56168800 | -0.33427900 | 1.29414400  |
| H  | -6.59782300 | 0.10775300  | 0.06779200  |
| H  | -5.75288400 | 0.98205500  | -1.24735300 |
| H  | -5.95150100 | -0.78110500 | -1.34564400 |
| H  | -1.20435900 | -3.50101800 | -1.17544200 |
| H  | -1.73336400 | -2.00963500 | -2.02210000 |
| H  | -0.17969200 | -2.05117400 | -1.19408600 |

Compound **1a**, optimization level B3LYP/6-311++G(2d,p)

Conformation #4

|    |             |             |             |
|----|-------------|-------------|-------------|
| C  | -3.92276100 | -0.04007600 | -0.02275700 |
| C  | -3.32344800 | -0.27951100 | 1.19877200  |
| C  | -1.94232000 | -0.47022000 | 1.19162300  |
| C  | -1.16680900 | -0.42250000 | 0.00478600  |
| C  | -1.82446800 | -0.17972000 | -1.20896500 |
| C  | -3.19555700 | 0.01027000  | -1.22069600 |
| C  | 0.20686600  | -0.65816800 | 0.37694000  |
| C  | 0.20733200  | -0.83484200 | 1.73563800  |
| N  | -1.07776700 | -0.72961500 | 2.22699400  |
| C  | 1.37902600  | -0.70820400 | -0.57700500 |
| C  | 2.01977600  | -2.12250000 | -0.69242500 |
| C  | 0.97442800  | -3.14353900 | -1.16008300 |
| C  | 3.22463500  | -2.14826900 | -1.64217600 |
| C  | 2.41977000  | 0.43557800  | -0.34014400 |
| C  | 1.71643800  | 1.78197400  | -0.20110400 |
| C  | 3.40281800  | 0.25770100  | 0.82838600  |
| O  | 1.74306200  | 2.48645100  | 0.77710400  |
| O  | 3.23352300  | -0.56425100 | 1.69924100  |
| O  | 1.05502600  | 2.09678900  | -1.32896400 |
| C  | 0.29157600  | 3.31927000  | -1.28518000 |
| C  | 4.63043300  | 1.14068300  | 0.80517300  |
| Cl | -5.66585800 | 0.21133400  | -0.08185900 |
| H  | -3.90704300 | -0.31586200 | 2.10932900  |
| H  | -1.27296800 | -0.13704600 | -2.14044200 |
| H  | -3.71790300 | 0.19765400  | -2.14898400 |
| H  | 1.03773300  | -1.02013700 | 2.39510600  |
| H  | -1.32734400 | -0.78125200 | 3.19971300  |
| H  | 0.97190800  | -0.48432400 | -1.56797900 |
| H  | 2.36211300  | -2.41562300 | 0.30213700  |
| H  | 0.11060200  | -3.17349200 | -0.49542500 |
| H  | 0.61528000  | -2.90631000 | -2.16686700 |
| H  | 1.40871800  | -4.14560800 | -1.19244500 |
| H  | 3.58484500  | -3.17196900 | -1.76694200 |
| H  | 4.06757700  | -1.55868400 | -1.27542000 |
| H  | 2.95577600  | -1.77333800 | -2.63568500 |
| H  | 3.02843200  | 0.51567700  | -1.24708800 |
| H  | 0.94440600  | 4.16593100  | -1.07656600 |
| H  | -0.15970400 | 3.41318700  | -2.26914800 |
| H  | -0.47635300 | 3.25320600  | -0.51584500 |
| H  | 4.34210700  | 2.19194600  | 0.75174200  |
| H  | 5.22347600  | 0.96451800  | 1.70036600  |
| H  | 5.23298500  | 0.91666800  | -0.08065000 |

Compound **1a**, optimization level B3LYP/6-311++G(2d,p)

## Conformation #6

|    |             |             |             |
|----|-------------|-------------|-------------|
| C  | 4.16950200  | -0.07671000 | -0.49670000 |
| C  | 3.76432500  | -0.33127700 | 0.79912400  |
| C  | 2.40149900  | -0.20513800 | 1.06487100  |
| C  | 1.45786800  | 0.16956800  | 0.07496900  |
| C  | 1.92090900  | 0.41594500  | -1.22521400 |
| C  | 3.26970200  | 0.29136300  | -1.50757600 |
| C  | 0.15782200  | 0.18461700  | 0.70141100  |
| C  | 0.36447500  | -0.17788700 | 2.00708900  |
| N  | 1.70678000  | -0.40135300 | 2.23405400  |
| C  | -1.15742600 | 0.51394700  | 0.03517900  |
| C  | -1.59521500 | 2.00628200  | 0.19379900  |
| C  | -1.83354900 | 2.43852000  | 1.64460500  |
| C  | -0.60763900 | 2.95473500  | -0.49501200 |
| C  | -2.27382900 | -0.46187900 | 0.50403000  |
| C  | -3.61449300 | -0.18823600 | -0.16762300 |
| C  | -1.90509000 | -1.95783100 | 0.35044600  |
| O  | -4.63052800 | 0.07119300  | 0.42415400  |
| O  | -2.13135900 | -2.71134500 | 1.26887900  |
| O  | -3.54253200 | -0.27655300 | -1.51379300 |
| C  | -4.77690500 | -0.04194300 | -2.21984300 |
| C  | -1.27541900 | -2.44065600 | -0.93476800 |
| Cl | 5.87719400  | -0.22024700 | -0.89851900 |
| H  | 4.47747300  | -0.61647800 | 1.56130200  |
| H  | 1.23721200  | 0.70640500  | -2.01341700 |
| H  | 3.64269900  | 0.47757500  | -2.50538700 |
| H  | -0.34499300 | -0.31584900 | 2.80668900  |
| H  | 2.09882400  | -0.72515900 | 3.10167700  |
| H  | -1.02643600 | 0.35573100  | -1.03878300 |
| H  | -2.54946500 | 2.10039400  | -0.33731700 |
| H  | -0.91312600 | 2.38009900  | 2.23037200  |
| H  | -2.17624900 | 3.47549500  | 1.67180400  |
| H  | -2.59647400 | 1.83506500  | 2.13985500  |
| H  | -0.97460600 | 3.98288600  | -0.44970300 |
| H  | -0.47204700 | 2.69850100  | -1.54894400 |
| H  | 0.37278900  | 2.93073100  | -0.01429900 |
| H  | -2.46994700 | -0.33306300 | 1.56629700  |
| H  | -4.53703400 | -0.16446800 | -3.27280700 |
| H  | -5.53276800 | -0.76207900 | -1.90900800 |
| H  | -5.13969100 | 0.96615600  | -2.02221600 |
| H  | -1.80068600 | -2.04876300 | -1.80608600 |
| H  | -0.24189700 | -2.08741100 | -0.98596200 |
| H  | -1.27719700 | -3.52898600 | -0.94425900 |

Compound **1a**, optimization level B3LYP/6-311++G(2d,p)

Conformation #7

|    |             |             |             |
|----|-------------|-------------|-------------|
| C  | -3.97646500 | -0.33376800 | -0.41748300 |
| C  | -3.70958200 | 0.26659600  | 0.79643900  |
| C  | -2.38026300 | 0.59671400  | 1.05616200  |
| C  | -1.32362700 | 0.35040000  | 0.13756000  |
| C  | -1.65614000 | -0.26006300 | -1.08344500 |
| C  | -2.96968200 | -0.60035700 | -1.35516700 |
| C  | -0.10199800 | 0.81542100  | 0.76185800  |
| C  | -0.46910700 | 1.29651700  | 1.98903300  |
| N  | -1.83036200 | 1.18378600  | 2.16899300  |
| C  | 1.33387400  | 0.77909100  | 0.28509700  |
| C  | 1.70484200  | 1.87144600  | -0.76424400 |
| C  | 0.97712100  | 1.76199900  | -2.10892200 |
| C  | 1.52997200  | 3.27509200  | -0.17300600 |
| C  | 1.72927500  | -0.65282200 | -0.15774800 |
| C  | 3.16004400  | -0.79056700 | -0.66920300 |
| C  | 1.57580300  | -1.66930300 | 1.00487300  |
| O  | 3.46139900  | -1.39342600 | -1.67127300 |
| O  | 1.85325700  | -1.37046300 | 2.14014300  |
| O  | 4.05218400  | -0.20538000 | 0.14538700  |
| C  | 5.43371900  | -0.33621400 | -0.23890100 |
| C  | 1.08150200  | -3.04139300 | 0.61914000  |
| Cl | -5.63483200 | -0.77982800 | -0.80443700 |
| H  | -4.50057800 | 0.46536200  | 1.50771000  |
| H  | -0.90192500 | -0.46377200 | -1.83123900 |
| H  | -3.23067100 | -1.06992400 | -2.29376300 |
| H  | 0.15489000  | 1.70034600  | 2.77028100  |
| H  | -2.32897900 | 1.43485000  | 3.00525800  |
| H  | 1.94775700  | 0.98903700  | 1.16373200  |
| H  | 2.77463400  | 1.74385900  | -0.96050700 |
| H  | -0.09564200 | 1.93207000  | -1.99937900 |
| H  | 1.35956200  | 2.51669000  | -2.80072100 |
| H  | 1.12512900  | 0.78946900  | -2.58383300 |
| H  | 1.89412400  | 4.03221400  | -0.87183200 |
| H  | 2.08762100  | 3.38760000  | 0.76068700  |
| H  | 0.47953300  | 3.49104500  | 0.03550400  |
| H  | 1.11059600  | -0.99640400 | -0.98424900 |
| H  | 5.99810100  | 0.17926700  | 0.53343600  |
| H  | 5.71514600  | -1.38764700 | -0.28511600 |
| H  | 5.60183800  | 0.12338600  | -1.21253600 |
| H  | 1.65444600  | -3.43060700 | -0.22693800 |
| H  | 1.14860600  | -3.71831000 | 1.46867200  |
| H  | 0.04004300  | -2.96653600 | 0.29100000  |

Compound **1a**, optimization level B3LYP/6-311++G(2d,p)

## Conformation #8

|    |             |             |             |
|----|-------------|-------------|-------------|
| C  | -3.89555700 | -0.04933600 | -0.12238300 |
| C  | -3.32304700 | -0.19199800 | 1.12675700  |
| C  | -1.94578500 | -0.40703800 | 1.16179600  |
| C  | -1.14998600 | -0.48042800 | -0.01009100 |
| C  | -1.77994500 | -0.32627700 | -1.25304700 |
| C  | -3.14634800 | -0.11315800 | -1.30609700 |
| C  | 0.21215000  | -0.70943000 | 0.40716000  |
| C  | 0.18731800  | -0.76049600 | 1.77556100  |
| N  | -1.10317200 | -0.58390800 | 2.23268400  |
| C  | 1.39875700  | -0.88715600 | -0.51349300 |
| C  | 2.13149900  | -2.24502400 | -0.30916100 |
| C  | 1.16774800  | -3.40936800 | -0.57515200 |
| C  | 3.37216600  | -2.39237300 | -1.19984000 |
| C  | 2.35820800  | 0.34744100  | -0.53903800 |
| C  | 1.54442300  | 1.59408300  | -0.87847400 |
| C  | 3.27219900  | 0.55030000  | 0.67476700  |
| O  | 1.08318400  | 1.80861600  | -1.97093100 |
| O  | 3.13965700  | -0.06365500 | 1.70867400  |
| O  | 1.37806500  | 2.40823400  | 0.17714500  |
| C  | 0.55028100  | 3.56741600  | -0.04882100 |
| C  | 4.42368600  | 1.51633600  | 0.48120100  |
| Cl | -5.63239400 | 0.22756400  | -0.23559300 |
| H  | -3.92299600 | -0.13805900 | 2.02577300  |
| H  | -1.20890900 | -0.35701100 | -2.17279200 |
| H  | -3.64702600 | 0.01060700  | -2.25661500 |
| H  | 1.00234900  | -0.89377300 | 2.46590500  |
| H  | -1.37425700 | -0.56679200 | 3.20076200  |
| H  | 0.99564700  | -0.91392500 | -1.53161200 |
| H  | 2.45428200  | -2.29811100 | 0.73303700  |
| H  | 0.84291100  | -3.41732200 | -1.62058200 |
| H  | 1.65838200  | -4.36474800 | -0.37426800 |
| H  | 0.27722900  | -3.35024600 | 0.05122800  |
| H  | 3.79169200  | -3.39573300 | -1.09721400 |
| H  | 4.16657500  | -1.68914700 | -0.94112600 |
| H  | 3.12300700  | -2.24875800 | -2.25658500 |
| H  | 3.02087900  | 0.22804100  | -1.40141800 |
| H  | 0.53565200  | 4.10017100  | 0.89811600  |
| H  | 0.97520700  | 4.18846400  | -0.83660800 |
| H  | -0.45411200 | 3.25762300  | -0.33353900 |
| H  | 4.11783800  | 2.41720700  | -0.05237200 |
| H  | 4.84902700  | 1.77818400  | 1.44819700  |
| H  | 5.19566600  | 1.02558300  | -0.12097400 |

Compound **1a**, optimization level B3LYP/6-311++G(2d,p)

## Conformation #9

|    |             |             |             |
|----|-------------|-------------|-------------|
| C  | -4.36090500 | -0.21730000 | -0.36689000 |
| C  | -3.90419500 | 0.62866600  | 0.62559300  |
| C  | -2.52570800 | 0.66539300  | 0.83058100  |
| C  | -1.61866500 | -0.11578200 | 0.07156300  |
| C  | -2.13194700 | -0.95789500 | -0.92414500 |
| C  | -3.49806800 | -1.00634100 | -1.14096900 |
| C  | -0.28926200 | 0.18591000  | 0.54349300  |
| C  | -0.44213400 | 1.11041000  | 1.54264600  |
| N  | -1.78109900 | 1.39733200  | 1.72436700  |
| C  | 0.97956000  | -0.45744000 | 0.03775100  |
| C  | 1.16889300  | -1.86358300 | 0.70467200  |
| C  | 2.13128200  | -2.78898700 | -0.05199500 |
| C  | 1.53808300  | -1.79831700 | 2.19103100  |
| C  | 2.20174200  | 0.49127800  | 0.17905000  |
| C  | 3.41088600  | 0.00287500  | -0.60645000 |
| C  | 1.91611200  | 1.93863500  | -0.30532800 |
| O  | 3.40797800  | -0.26772600 | -1.78307800 |
| O  | 2.19319000  | 2.86524100  | 0.42157200  |
| O  | 4.51266300  | -0.04217800 | 0.16392100  |
| C  | 5.72927800  | -0.42517000 | -0.50677000 |
| C  | 1.32594300  | 2.14106800  | -1.67823800 |
| Cl | -6.09198200 | -0.30970700 | -0.67488500 |
| H  | -4.59139600 | 1.22862800  | 1.20750500  |
| H  | -1.47411000 | -1.57135700 | -1.52831900 |
| H  | -3.91205700 | -1.64936600 | -1.90547700 |
| H  | 0.30119000  | 1.61334400  | 2.13940100  |
| H  | -2.14147800 | 2.08405700  | 2.36437800  |
| H  | 0.84881800  | -0.64196800 | -1.03313500 |
| H  | 0.17740700  | -2.32387900 | 0.64101600  |
| H  | 3.17478900  | -2.49337900 | 0.07456500  |
| H  | 2.04180900  | -3.80808300 | 0.33279200  |
| H  | 1.91741700  | -2.81288500 | -1.12240300 |
| H  | 1.49067200  | -2.79679500 | 2.63206300  |
| H  | 0.85415500  | -1.15798400 | 2.75119500  |
| H  | 2.55563700  | -1.42784300 | 2.34050900  |
| H  | 2.49548000  | 0.59447700  | 1.22145000  |
| H  | 6.50079900  | -0.39860400 | 0.25792900  |
| H  | 5.63305200  | -1.42713300 | -0.92403300 |
| H  | 5.95559900  | 0.27745700  | -1.30790200 |
| H  | 1.86699000  | 1.55452500  | -2.42231700 |
| H  | 0.28846400  | 1.79696300  | -1.68280600 |
| H  | 1.35213100  | 3.20029700  | -1.92683500 |



Compound **1a**, optimization level B3LYP/6-311++G(2d,p)

Conformation #16

|    |             |             |             |
|----|-------------|-------------|-------------|
| C  | 4.17104400  | -0.19499400 | -0.47562700 |
| C  | 3.78761800  | -0.09070900 | 0.84685200  |
| C  | 2.42718400  | 0.09975700  | 1.08833900  |
| C  | 1.46919900  | 0.18996800  | 0.04847300  |
| C  | 1.90889100  | 0.06837200  | -1.27635500 |
| C  | 3.25413000  | -0.12157200 | -1.53483800 |
| C  | 0.17869800  | 0.38405300  | 0.66142700  |
| C  | 0.40243100  | 0.39435900  | 2.01408300  |
| N  | 1.74909100  | 0.22619100  | 2.27708500  |
| C  | -1.13708700 | 0.54893200  | -0.06543200 |
| C  | -1.65549800 | 2.01978400  | -0.10635900 |
| C  | -2.00574200 | 2.61209000  | 1.26373500  |
| C  | -0.66974000 | 2.92917200  | -0.84900600 |
| C  | -2.18607200 | -0.44404100 | 0.49120800  |
| C  | -3.57668500 | -0.32742100 | -0.12640700 |
| C  | -1.73371700 | -1.91451000 | 0.29065500  |
| O  | -4.60066200 | -0.32469000 | 0.51394100  |
| O  | -1.11973500 | -2.25400500 | -0.68974200 |
| O  | -3.53481700 | -0.27571400 | -1.46688300 |
| C  | -4.80963000 | -0.21678200 | -2.13420700 |
| C  | -2.13068500 | -2.88158900 | 1.37960600  |
| Cl | 5.87532600  | -0.43460700 | -0.85021200 |
| H  | 4.51374000  | -0.15712300 | 1.64634800  |
| H  | 1.20650800  | 0.11054500  | -2.09930600 |
| H  | 3.61103300  | -0.22037600 | -2.55079700 |
| H  | -0.29065300 | 0.51189300  | 2.83150600  |
| H  | 2.16172600  | 0.19718500  | 3.19334800  |
| H  | -0.96892400 | 0.25097500  | -1.10174100 |
| H  | -2.57593000 | 1.99750800  | -0.69913500 |
| H  | -1.11759800 | 2.71231600  | 1.89196200  |
| H  | -2.43151400 | 3.61079400  | 1.14014600  |
| H  | -2.74359100 | 2.01287800  | 1.80241700  |
| H  | -1.08138800 | 3.93632500  | -0.95136600 |
| H  | -0.45664800 | 2.55298500  | -1.85262400 |
| H  | 0.27926600  | 3.00973200  | -0.31387400 |
| H  | -2.34659000 | -0.28550200 | 1.55722200  |
| H  | -4.57880500 | -0.19526700 | -3.19578100 |
| H  | -5.40623500 | -1.09416100 | -1.88710500 |
| H  | -5.35149100 | 0.68102200  | -1.83800100 |
| H  | -3.19035100 | -2.77083200 | 1.62478900  |
| H  | -1.91411900 | -3.90298700 | 1.07262600  |
| H  | -1.56692400 | -2.64686500 | 2.28796900  |

Compound **1a**, optimization level B3LYP/6-311++G(2d,p)

## Conformation #19

|    |             |             |             |
|----|-------------|-------------|-------------|
| C  | -3.88604700 | -0.57655200 | -0.43224400 |
| C  | -3.71335400 | 0.25552200  | 0.65553600  |
| C  | -2.42107800 | 0.72233200  | 0.89184700  |
| C  | -1.31037400 | 0.38575500  | 0.07069800  |
| C  | -1.54732500 | -0.46260500 | -1.02368800 |
| C  | -2.82278300 | -0.93988900 | -1.26990400 |
| C  | -0.14950500 | 1.04169200  | 0.63604300  |
| C  | -0.60149100 | 1.71494800  | 1.73827500  |
| N  | -1.95973700 | 1.54159400  | 1.89225200  |
| C  | 1.30490000  | 1.02592400  | 0.21628300  |
| C  | 1.64114500  | 1.92908700  | -1.01093500 |
| C  | 0.98602700  | 1.51113700  | -2.33240200 |
| C  | 1.32992500  | 3.39842900  | -0.70302300 |
| C  | 1.83095800  | -0.42381400 | 0.07358000  |
| C  | 3.33390000  | -0.48602800 | -0.16971600 |
| C  | 1.58354300  | -1.23611200 | 1.37653600  |
| O  | 4.14230000  | 0.33041000  | 0.18524700  |
| O  | 1.89079000  | -0.78061100 | 2.45028200  |
| O  | 3.66176700  | -1.63182900 | -0.80979500 |
| C  | 5.07090500  | -1.83911500 | -1.02892200 |
| C  | 0.96643500  | -2.60237600 | 1.21497700  |
| Cl | -5.49312000 | -1.20398100 | -0.78236700 |
| H  | -4.54688400 | 0.52510200  | 1.29086400  |
| H  | -0.74734700 | -0.74725800 | -1.69356000 |
| H  | -3.01082000 | -1.59217700 | -2.11178800 |
| H  | -0.04039700 | 2.30227600  | 2.44759600  |
| H  | -2.51066700 | 1.90995200  | 2.64845400  |
| H  | 1.86785400  | 1.44669400  | 1.05270000  |
| H  | 2.72389800  | 1.85707000  | -1.14014200 |
| H  | -0.10020400 | 1.61463300  | -2.29598400 |
| H  | 1.34851700  | 2.14765000  | -3.14354200 |
| H  | 1.22117200  | 0.47978800  | -2.60800200 |
| H  | 1.66942000  | 4.03911100  | -1.52066700 |
| H  | 1.83456700  | 3.72873100  | 0.20863000  |
| H  | 0.25747500  | 3.56267300  | -0.57329900 |
| H  | 1.34698900  | -0.95045100 | -0.74762400 |
| H  | 5.14820300  | -2.79964100 | -1.53151300 |
| H  | 5.47729000  | -1.04454000 | -1.65376600 |
| H  | 5.60320400  | -1.85601000 | -0.07848400 |
| H  | -0.04086900 | -2.49795900 | 0.80108200  |
| H  | 1.54704200  | -3.19448800 | 0.50260700  |
| H  | 0.91920200  | -3.10840100 | 2.17739000  |

Compound **1a**, optimization level B3LYP/6-311++G(2d,p)

## Conformation #33

|    |             |             |             |
|----|-------------|-------------|-------------|
| C  | 4.15235800  | 0.09182500  | 0.44223800  |
| C  | 3.69122000  | 0.50288900  | -0.79373400 |
| C  | 2.34193200  | 0.27769400  | -1.06340000 |
| C  | 1.46990500  | -0.34244900 | -0.13353700 |
| C  | 1.98632300  | -0.74206700 | 1.10677200  |
| C  | 3.32310100  | -0.52412700 | 1.39097800  |
| C  | 0.16774700  | -0.41933300 | -0.74611800 |
| C  | 0.29704300  | 0.14638000  | -1.98601600 |
| N  | 1.59970700  | 0.56810600  | -2.18296700 |
| C  | -1.08345500 | -0.96479900 | -0.09832000 |
| C  | -1.95316900 | -1.79044300 | -1.08706200 |
| C  | -1.17427600 | -3.03388100 | -1.54404100 |
| C  | -3.30961200 | -2.22281200 | -0.51956100 |
| C  | -1.78524700 | 0.19542500  | 0.68130900  |
| C  | -2.41938500 | 1.25108900  | -0.20451900 |
| C  | -2.70467300 | -0.29798600 | 1.82604000  |
| O  | -3.12762500 | 1.04793300  | -1.16069000 |
| O  | -2.36101800 | -1.24741200 | 2.48923200  |
| O  | -2.10408300 | 2.49343300  | 0.22245800  |
| C  | -2.67226800 | 3.57867000  | -0.53351000 |
| C  | -3.95702700 | 0.48330400  | 2.14347000  |
| Cl | 5.84769000  | 0.34934000  | 0.84454600  |
| H  | 4.35361600  | 0.97425300  | -1.50787000 |
| H  | 1.35312200  | -1.22142900 | 1.84404100  |
| H  | 3.74046400  | -0.82630700 | 2.34170800  |
| H  | -0.43856000 | 0.28308600  | -2.76205600 |
| H  | 1.95167600  | 0.98545400  | -3.02714000 |
| H  | -0.77232500 | -1.65131200 | 0.69443800  |
| H  | -2.15533500 | -1.16917200 | -1.96284700 |
| H  | -0.99567800 | -3.70968500 | -0.70193800 |
| H  | -1.74471600 | -3.58626100 | -2.29466500 |
| H  | -0.20725700 | -2.77729600 | -1.97822900 |
| H  | -3.84042300 | -2.82842500 | -1.25839900 |
| H  | -3.94970400 | -1.36912100 | -0.29346200 |
| H  | -3.19533700 | -2.82463800 | 0.38474500  |
| H  | -0.99100800 | 0.70951000  | 1.23290100  |
| H  | -2.31688800 | 4.48539700  | -0.05122600 |
| H  | -2.33477000 | 3.53605000  | -1.56845700 |
| H  | -3.76079200 | 3.53034200  | -0.51042800 |
| H  | -4.46101000 | 0.03328700  | 2.99619300  |
| H  | -3.69804600 | 1.52114600  | 2.37183800  |
| H  | -4.62698700 | 0.50168000  | 1.28040000  |

Compound **1a**, optimization level B3LYP/6-311++G(2d,p)

## Conformation #35

|    |             |             |             |
|----|-------------|-------------|-------------|
| C  | 4.21568500  | -0.26937900 | -0.38882000 |
| C  | 3.77756400  | -0.16469900 | 0.91659400  |
| C  | 2.41481700  | 0.06947800  | 1.09959800  |
| C  | 1.50802900  | 0.20163900  | 0.01932300  |
| C  | 2.00153700  | 0.07783600  | -1.28630700 |
| C  | 3.34990300  | -0.15497900 | -1.48679300 |
| C  | 0.19832600  | 0.43479000  | 0.57574300  |
| C  | 0.36156700  | 0.42593900  | 1.93714600  |
| N  | 1.68865000  | 0.20787000  | 2.25846900  |
| C  | -1.07582100 | 0.65329600  | -0.20989900 |
| C  | -1.55881100 | 2.13676900  | -0.22838600 |
| C  | -1.96935400 | 2.69442700  | 1.13968500  |
| C  | -0.51008300 | 3.04390000  | -0.88259000 |
| C  | -2.17296800 | -0.33730400 | 0.24570200  |
| C  | -3.44212800 | -0.25232100 | -0.59369700 |
| C  | -1.67731100 | -1.80503000 | 0.11756400  |
| O  | -3.50552200 | 0.09503700  | -1.74315700 |
| O  | -1.12459000 | -2.18107700 | -0.88548600 |
| O  | -4.51213800 | -0.67418900 | 0.11892800  |
| C  | -5.76141000 | -0.70745500 | -0.59911400 |
| C  | -1.94432700 | -2.71496700 | 1.29144100  |
| Cl | 5.92601000  | -0.56288900 | -0.69002100 |
| H  | 4.46488800  | -0.26310300 | 1.74651300  |
| H  | 1.33817500  | 0.15203700  | -2.13884800 |
| H  | 3.74826400  | -0.25582400 | -2.48701300 |
| H  | -0.36266500 | 0.56271400  | 2.72398200  |
| H  | 2.06027600  | 0.16511000  | 3.19157800  |
| H  | -0.86485000 | 0.38966900  | -1.24789400 |
| H  | -2.44120700 | 2.15321500  | -0.87283800 |
| H  | -1.11518400 | 2.76285800  | 1.81758900  |
| H  | -2.37394500 | 3.70292300  | 1.02429200  |
| H  | -2.74284200 | 2.09286600  | 1.62467700  |
| H  | -0.89194200 | 4.06378600  | -0.97424200 |
| H  | -0.25239300 | 2.69497700  | -1.88535800 |
| H  | 0.40980400  | 3.08371800  | -0.29424600 |
| H  | -2.45691300 | -0.16758500 | 1.28450800  |
| H  | -6.49459600 | -1.08037100 | 0.11120700  |
| H  | -6.02898100 | 0.29257300  | -0.93854800 |
| H  | -5.68530800 | -1.37029900 | -1.46035900 |
| H  | -3.00296800 | -2.68194800 | 1.56141700  |
| H  | -1.64524800 | -3.73355500 | 1.05157700  |
| H  | -1.37836800 | -2.35954100 | 2.15766600  |

Compound **1a**, optimization level B3LYP/6-311++G(2d,p)

## Conformation #46

|    |             |             |             |
|----|-------------|-------------|-------------|
| C  | -3.91466700 | -0.57557000 | -0.40451600 |
| C  | -3.74645800 | 0.40431200  | 0.55207200  |
| C  | -2.44197900 | 0.84349100  | 0.77604900  |
| C  | -1.31937900 | 0.33518500  | 0.07108400  |
| C  | -1.55018200 | -0.66561700 | -0.88638800 |
| C  | -2.83653000 | -1.11456100 | -1.12042900 |
| C  | -0.15129200 | 1.02505500  | 0.57832400  |
| C  | -0.61252300 | 1.88496800  | 1.54033000  |
| N  | -1.98163600 | 1.78915900  | 1.66048700  |
| C  | 1.30796900  | 0.92398500  | 0.19324800  |
| C  | 1.69226400  | 1.74268300  | -1.08246800 |
| C  | 0.98298300  | 1.30247300  | -2.36786200 |
| C  | 1.49792800  | 3.24532200  | -0.85093800 |
| C  | 1.81205900  | -0.54348000 | 0.09957000  |
| C  | 3.32765700  | -0.57807700 | -0.04926300 |
| C  | 1.44585200  | -1.42080500 | 1.32326600  |
| O  | 4.10670700  | 0.01416800  | 0.65917200  |
| O  | 0.93299400  | -2.49974500 | 1.14283000  |
| O  | 3.70407200  | -1.38130800 | -1.05875600 |
| C  | 5.12547000  | -1.52569600 | -1.24869000 |
| C  | 1.76495300  | -0.90375000 | 2.70530500  |
| Cl | -5.53607300 | -1.17390000 | -0.73755900 |
| H  | -4.59049900 | 0.80519100  | 1.09778500  |
| H  | -0.73566500 | -1.10356700 | -1.44589700 |
| H  | -3.02114500 | -1.88855400 | -1.85257500 |
| H  | -0.05719200 | 2.57482700  | 2.15650300  |
| H  | -2.54692000 | 2.30607300  | 2.31177400  |
| H  | 1.87628500  | 1.38344300  | 1.00698700  |
| H  | 2.76699000  | 1.58426500  | -1.22600700 |
| H  | -0.09479100 | 1.46449000  | -2.30506400 |
| H  | 1.35529300  | 1.88367500  | -3.21509000 |
| H  | 1.15555500  | 0.24974000  | -2.60053400 |
| H  | 1.86833600  | 3.81343900  | -1.70762500 |
| H  | 2.04163700  | 3.58705900  | 0.03392100  |
| H  | 0.44274900  | 3.49486400  | -0.71749600 |
| H  | 1.38213100  | -1.05801800 | -0.75546200 |
| H  | 5.23627800  | -2.20186300 | -2.09196600 |
| H  | 5.57865200  | -0.55907200 | -1.46593700 |
| H  | 5.58464000  | -1.94585800 | -0.35459600 |
| H  | 2.76203000  | -0.46188300 | 2.73934100  |
| H  | 1.04778100  | -0.12162700 | 2.96761700  |
| H  | 1.67761700  | -1.71886400 | 3.42128300  |

Compound **1a**, optimization level B3LYP/6-311++G(2d,p)

## Conformation #59

|    |             |             |             |
|----|-------------|-------------|-------------|
| C  | 4.19842100  | -0.06166000 | -0.51994700 |
| C  | 3.80732000  | -0.40472700 | 0.75995500  |
| C  | 2.45354000  | -0.26004200 | 1.06011900  |
| C  | 1.50625900  | 0.21352300  | 0.11693600  |
| C  | 1.95451000  | 0.55074200  | -1.16781000 |
| C  | 3.29480000  | 0.41159000  | -1.48261400 |
| C  | 0.21931300  | 0.22293700  | 0.76595100  |
| C  | 0.43375500  | -0.23115100 | 2.04024400  |
| N  | 1.77205700  | -0.51460700 | 2.22620000  |
| C  | -1.09339200 | 0.66957500  | 0.16355500  |
| C  | -1.50616900 | 2.07108200  | 0.71917300  |
| C  | -0.42312800 | 3.11893700  | 0.43035400  |
| C  | -2.85736900 | 2.58283000  | 0.20289200  |
| C  | -2.21911800 | -0.39033400 | 0.37488100  |
| C  | -3.32271000 | -0.27322300 | -0.66831000 |
| C  | -1.71834800 | -1.85928600 | 0.33728600  |
| O  | -3.14827300 | -0.05214000 | -1.84207800 |
| O  | -1.90521200 | -2.57007200 | 1.29743600  |
| O  | -4.53156000 | -0.51167600 | -0.12853400 |
| C  | -5.64266800 | -0.49246500 | -1.04540400 |
| C  | -1.03345400 | -2.36017400 | -0.91074600 |
| Cl | 5.89463600  | -0.22380800 | -0.96306900 |
| H  | 4.52455100  | -0.76745000 | 1.48443400  |
| H  | 1.26524000  | 0.91878500  | -1.91826700 |
| H  | 3.65784500  | 0.66561300  | -2.46905800 |
| H  | -0.26886000 | -0.39934100 | 2.84058000  |
| H  | 2.16613200  | -0.91678500 | 3.05937300  |
| H  | -0.95297900 | 0.76792500  | -0.91665400 |
| H  | -1.58364200 | 1.96094900  | 1.80816200  |
| H  | -0.31027900 | 3.27429500  | -0.64702500 |
| H  | -0.69816400 | 4.07908100  | 0.87313300  |
| H  | 0.54819400  | 2.83044800  | 0.83168200  |
| H  | -3.04748400 | 3.58281900  | 0.60015400  |
| H  | -3.69418400 | 1.95528000  | 0.51357100  |
| H  | -2.86712700 | 2.65141400  | -0.88772300 |
| H  | -2.66815800 | -0.27800100 | 1.36162600  |
| H  | -6.51828900 | -0.71599600 | -0.44206700 |
| H  | -5.73340000 | 0.48955500  | -1.50877400 |
| H  | -5.50670300 | -1.24492300 | -1.82139300 |
| H  | -0.92782000 | -3.44175500 | -0.85113600 |
| H  | -1.58552200 | -2.07470000 | -1.80755700 |
| H  | -0.04157400 | -1.90804200 | -0.98798800 |

Compound **1a**, optimization level B3LYP/6-311++G(2d,p)

## Conformation #99

|    |             |             |             |
|----|-------------|-------------|-------------|
| C  | -3.99574200 | -0.35055000 | -0.41889200 |
| C  | -3.73112900 | 0.24702900  | 0.80329500  |
| C  | -2.39415800 | 0.55658500  | 1.07301200  |
| C  | -1.33120800 | 0.29048700  | 0.16239200  |
| C  | -1.66037500 | -0.32013200 | -1.06390200 |
| C  | -2.98052300 | -0.63740200 | -1.34996100 |
| C  | -0.10590700 | 0.74386000  | 0.79488800  |
| C  | -0.47942800 | 1.24338500  | 2.02094400  |
| N  | -1.84445800 | 1.14130700  | 2.19160900  |
| C  | 1.32814400  | 0.72850400  | 0.30444900  |
| C  | 1.68725000  | 1.89038900  | -0.68207400 |
| C  | 0.98972000  | 1.81557300  | -2.04793700 |
| C  | 1.45513600  | 3.26009000  | -0.02782600 |
| C  | 1.73231400  | -0.66993200 | -0.25772000 |
| C  | 3.16850600  | -0.68280200 | -0.77458700 |
| C  | 1.51472400  | -1.84409300 | 0.73202300  |
| O  | 3.48323600  | -0.87568800 | -1.92727900 |
| O  | 1.01266800  | -2.87070600 | 0.32144800  |
| O  | 4.06928200  | -0.44439800 | 0.21014500  |
| C  | 5.44765700  | -0.44108300 | -0.20490900 |
| C  | 1.94169400  | -1.68884100 | 2.17862700  |
| H  | -4.52670600 | 0.45974900  | 1.50953400  |
| H  | -0.89614200 | -0.54779900 | -1.79825400 |
| H  | -3.23968200 | -1.11004100 | -2.29072500 |
| H  | 0.13754100  | 1.67861100  | 2.79579600  |
| H  | -2.35391400 | 1.42591000  | 3.01354800  |
| H  | 1.95816900  | 0.90341600  | 1.18602000  |
| H  | 2.76870000  | 1.80443700  | -0.86167900 |
| H  | 1.32295000  | 2.64515100  | -2.68232800 |
| H  | -0.09804800 | 1.89308200  | -1.94739600 |
| H  | 1.22666600  | 0.88810200  | -2.57950200 |
| H  | 1.82891700  | 4.06054800  | -0.67654600 |
| H  | 1.97605000  | 3.34099000  | 0.93464500  |
| H  | 0.38995600  | 3.44263900  | 0.15073300  |
| H  | 1.12714700  | -0.92614900 | -1.12674700 |
| H  | 5.71878700  | -1.40822100 | -0.63530500 |
| H  | 5.62040100  | 0.34078300  | -0.94881600 |
| H  | 6.02430100  | -0.24593400 | 0.69951600  |
| H  | 2.94938300  | -1.27066100 | 2.25249400  |
| H  | 1.89539900  | -2.66436300 | 2.66689800  |
| H  | 1.25587300  | -1.00242200 | 2.68894900  |
| Cl | -5.65976900 | -0.76570800 | -0.82220800 |

Compound **1a**, optimization level PCM-B3LYP/6-311++G(2d,p)

Conformation #1

|    |             |             |             |
|----|-------------|-------------|-------------|
| C  | 4.24681300  | -0.06489400 | -0.40071200 |
| C  | 3.78068400  | -0.37681700 | 0.86166800  |
| C  | 2.40719200  | -0.25653700 | 1.06869400  |
| C  | 1.51240500  | 0.16806800  | 0.05404300  |
| C  | 2.03628000  | 0.47140500  | -1.21051800 |
| C  | 3.39658400  | 0.35335100  | -1.43466500 |
| C  | 0.18427900  | 0.16073100  | 0.61886400  |
| C  | 0.32802200  | -0.26238800 | 1.91449500  |
| N  | 1.65758700  | -0.50259400 | 2.19398400  |
| C  | -1.09544600 | 0.52870500  | -0.09281500 |
| C  | -1.53575800 | 2.01430600  | 0.11643300  |
| C  | -1.80576400 | 2.38957100  | 1.57771800  |
| C  | -0.53018900 | 2.98754900  | -0.50892800 |
| C  | -2.24670400 | -0.45366100 | 0.25976900  |
| C  | -3.45719300 | -0.21003900 | -0.63098900 |
| C  | -1.85093700 | -1.94539800 | 0.13029100  |
| O  | -3.42374500 | -0.13057200 | -1.83579300 |
| O  | -2.07343500 | -2.69685900 | 1.05141000  |
| O  | -4.58871300 | -0.12036800 | 0.08890700  |
| C  | -5.80117100 | 0.05974000  | -0.66951600 |
| C  | -1.21086900 | -2.41289200 | -1.15314300 |
| Cl | 5.97143000  | -0.19807000 | -0.72808700 |
| H  | 4.45650600  | -0.70031300 | 1.64234800  |
| H  | 1.39068400  | 0.79952200  | -2.01584900 |
| H  | 3.81636700  | 0.58264100  | -2.40452600 |
| H  | -0.41961500 | -0.43627800 | 2.67114200  |
| H  | 2.00671500  | -0.87341000 | 3.06106900  |
| H  | -0.91903900 | 0.42013400  | -1.16640100 |
| H  | -2.47484100 | 2.13107300  | -0.43616200 |
| H  | -0.89527800 | 2.32287900  | 2.17770300  |
| H  | -2.16521300 | 3.41962900  | 1.63726200  |
| H  | -2.56549600 | 1.75622500  | 2.04073600  |
| H  | -0.89251800 | 4.01498700  | -0.42466000 |
| H  | -0.37698100 | 2.77731500  | -1.57025200 |
| H  | 0.44037900  | 2.93594100  | -0.01046600 |
| H  | -2.56168800 | -0.33427900 | 1.29414400  |
| H  | -6.59782300 | 0.10775300  | 0.06779200  |
| H  | -5.75288400 | 0.98205500  | -1.24735300 |
| H  | -5.95150100 | -0.78110500 | -1.34564400 |
| H  | -1.20435900 | -3.50101800 | -1.17544200 |
| H  | -1.73336400 | -2.00963500 | -2.02210000 |
| H  | -0.17969200 | -2.05117400 | -1.19408600 |



Compound **1a**, optimization level PCM-B3LYP/6-311++G(2d,p)

## Conformation #4

|    |             |             |             |
|----|-------------|-------------|-------------|
| C  | -3.92273100 | -0.04043000 | -0.02279700 |
| C  | -3.32337000 | -0.27841600 | 1.19895800  |
| C  | -1.94220600 | -0.46899400 | 1.19193400  |
| C  | -1.16676700 | -0.42254300 | 0.00499600  |
| C  | -1.82452800 | -0.18115200 | -1.20897500 |
| C  | -3.19564100 | 0.00868400  | -1.22083200 |
| C  | 0.20696400  | -0.65754900 | 0.37734300  |
| C  | 0.20755200  | -0.83259500 | 1.73625700  |
| N  | -1.07753000 | -0.72693400 | 2.22755100  |
| C  | 1.37904800  | -0.70843800 | -0.57663900 |
| C  | 2.01984400  | -2.12281300 | -0.69089500 |
| C  | 0.97454700  | -3.14433300 | -1.15762600 |
| C  | 3.22464300  | -2.14928800 | -1.64071700 |
| C  | 2.41981500  | 0.43551900  | -0.34086300 |
| C  | 1.71644300  | 1.78194900  | -0.20208600 |
| C  | 3.40332700  | 0.25831500  | 0.82741300  |
| O  | 1.74433300  | 2.48734200  | 0.77542600  |
| O  | 3.23396600  | -0.56270500 | 1.69913500  |
| O  | 1.05339200  | 2.09559300  | -1.32929400 |
| C  | 0.28963800  | 3.31782400  | -1.28551100 |
| C  | 4.63137400  | 1.14055200  | 0.80277700  |
| Cl | -5.66591800 | 0.21073000  | -0.08209900 |
| H  | -3.90687000 | -0.31377400 | 2.10960900  |
| H  | -1.27310100 | -0.13942500 | -2.14054000 |
| H  | -3.71806200 | 0.19500600  | -2.14928600 |
| H  | 1.03804700  | -1.01692800 | 2.39587500  |
| H  | -1.32707300 | -0.77773800 | 3.20031800  |
| H  | 0.97183500  | -0.48542100 | -1.56776700 |
| H  | 2.36224500  | -2.41503600 | 0.30390900  |
| H  | 0.11079400  | -3.17383200 | -0.49285600 |
| H  | 0.61526600  | -2.90796000 | -2.16456300 |
| H  | 1.40894200  | -4.14637900 | -1.18921600 |
| H  | 3.58504000  | -3.17303500 | -1.76450800 |
| H  | 4.06750700  | -1.55916600 | -1.27463400 |
| H  | 2.95561400  | -1.77536700 | -2.63456200 |
| H  | 3.02798900  | 0.51525500  | -1.24815200 |
| H  | 0.94240400  | 4.16487400  | -1.07825500 |
| H  | -0.16283400 | 3.41092500  | -2.26901900 |
| H  | -0.47739300 | 3.25206600  | -0.51525100 |
| H  | 4.34353100  | 2.19192600  | 0.74850900  |
| H  | 5.22480700  | 0.96502100  | 1.69782700  |
| H  | 5.23337300  | 0.91551000  | -0.08316800 |

Compound **1a**, optimization level PCM-B3LYP/6-311++G(2d,p)

## Conformation #6

|    |             |             |             |
|----|-------------|-------------|-------------|
| C  | 4.16959500  | -0.07641600 | -0.49665700 |
| C  | 3.76441900  | -0.33150700 | 0.79905400  |
| C  | 2.40158200  | -0.20550800 | 1.06483300  |
| C  | 1.45793800  | 0.16954100  | 0.07507300  |
| C  | 1.92099200  | 0.41641900  | -1.22500800 |
| C  | 3.26979600  | 0.29200100  | -1.50739900 |
| C  | 0.15787600  | 0.18423300  | 0.70148300  |
| C  | 0.36454400  | -0.17863400 | 2.00706400  |
| N  | 1.70683800  | -0.40224300 | 2.23390900  |
| C  | -1.15736500 | 0.51373100  | 0.03534200  |
| C  | -1.59524900 | 2.00599000  | 0.19448900  |
| C  | -1.83337400 | 2.43783400  | 1.64544800  |
| C  | -0.60789900 | 2.95473500  | -0.49425000 |
| C  | -2.27374900 | -0.46235000 | 0.50378200  |
| C  | -3.61452900 | -0.18824100 | -0.16739500 |
| C  | -1.90513500 | -1.95825200 | 0.34923600  |
| O  | -4.63047400 | 0.07072000  | 0.42474400  |
| O  | -2.13111000 | -2.71222700 | 1.26737700  |
| O  | -3.54280000 | -0.27540500 | -1.51366300 |
| C  | -4.77730300 | -0.04023500 | -2.21925100 |
| C  | -1.27570500 | -2.44041100 | -0.93632700 |
| Cl | 5.87730300  | -0.21975100 | -0.89852700 |
| H  | 4.47755100  | -0.61699000 | 1.56114100  |
| H  | 1.23729800  | 0.70712700  | -2.01312300 |
| H  | 3.64278900  | 0.47858800  | -2.50513900 |
| H  | -0.34491800 | -0.31687700 | 2.80662100  |
| H  | 2.09888000  | -0.72641200 | 3.10139600  |
| H  | -1.02635600 | 0.35593400  | -1.03867600 |
| H  | -2.54960000 | 2.10015400  | -0.33643800 |
| H  | -0.91286300 | 2.37924000  | 2.23106100  |
| H  | -2.17604800 | 3.47480600  | 1.67298500  |
| H  | -2.59623300 | 1.83425500  | 2.14064600  |
| H  | -0.97501900 | 3.98282200  | -0.44868800 |
| H  | -0.47239000 | 2.69873300  | -1.54824600 |
| H  | 0.37258900  | 2.93078400  | -0.01366100 |
| H  | -2.46961500 | -0.33419200 | 1.56616800  |
| H  | -4.53763500 | -0.16177600 | -3.27238300 |
| H  | -5.53305900 | -0.76071500 | -1.90895200 |
| H  | -5.14011900 | 0.96766000  | -2.02064700 |
| H  | -1.80110100 | -2.04803200 | -1.80735000 |
| H  | -0.24217400 | -2.08719100 | -0.98750100 |
| H  | -1.27753000 | -3.52873400 | -0.94640200 |

Compound **1a**, optimization level PCM-B3LYP/6-311++G(2d,p)

Conformation #7

|    |             |             |             |
|----|-------------|-------------|-------------|
| C  | -3.97646500 | -0.33376800 | -0.41748300 |
| C  | -3.70958200 | 0.26659600  | 0.79643900  |
| C  | -2.38026300 | 0.59671400  | 1.05616200  |
| C  | -1.32362700 | 0.35040000  | 0.13756000  |
| C  | -1.65614000 | -0.26006300 | -1.08344500 |
| C  | -2.96968200 | -0.60035700 | -1.35516700 |
| C  | -0.10199800 | 0.81542100  | 0.76185800  |
| C  | -0.46910700 | 1.29651700  | 1.98903300  |
| N  | -1.83036200 | 1.18378600  | 2.16899300  |
| C  | 1.33387400  | 0.77909100  | 0.28509700  |
| C  | 1.70484200  | 1.87144600  | -0.76424400 |
| C  | 0.97712100  | 1.76199900  | -2.10892200 |
| C  | 1.52997200  | 3.27509200  | -0.17300600 |
| C  | 1.72927500  | -0.65282200 | -0.15774800 |
| C  | 3.16004400  | -0.79056700 | -0.66920300 |
| C  | 1.57580300  | -1.66930300 | 1.00487300  |
| O  | 3.46139900  | -1.39342600 | -1.67127300 |
| O  | 1.85325700  | -1.37046300 | 2.14014300  |
| O  | 4.05218400  | -0.20538000 | 0.14538700  |
| C  | 5.43371900  | -0.33621400 | -0.23890100 |
| C  | 1.08150200  | -3.04139300 | 0.61914000  |
| Cl | -5.63483200 | -0.77982800 | -0.80443700 |
| H  | -4.50057800 | 0.46536200  | 1.50771000  |
| H  | -0.90192500 | -0.46377200 | -1.83123900 |
| H  | -3.23067100 | -1.06992400 | -2.29376300 |
| H  | 0.15489000  | 1.70034600  | 2.77028100  |
| H  | -2.32897900 | 1.43485000  | 3.00525800  |
| H  | 1.94775700  | 0.98903700  | 1.16373200  |
| H  | 2.77463400  | 1.74385900  | -0.96050700 |
| H  | -0.09564200 | 1.93207000  | -1.99937900 |
| H  | 1.35956200  | 2.51669000  | -2.80072100 |
| H  | 1.12512900  | 0.78946900  | -2.58383300 |
| H  | 1.89412400  | 4.03221400  | -0.87183200 |
| H  | 2.08762100  | 3.38760000  | 0.76068700  |
| H  | 0.47953300  | 3.49104500  | 0.03550400  |
| H  | 1.11059600  | -0.99640400 | -0.98424900 |
| H  | 5.99810100  | 0.17926700  | 0.53343600  |
| H  | 5.71514600  | -1.38764700 | -0.28511600 |
| H  | 5.60183800  | 0.12338600  | -1.21253600 |
| H  | 1.65444600  | -3.43060700 | -0.22693800 |
| H  | 1.14860600  | -3.71831000 | 1.46867200  |
| H  | 0.04004300  | -2.96653600 | 0.29100000  |

Compound **1a**, optimization level PCM-B3LYP/6-311++G(2d,p)

## Conformation #8

|    |             |             |             |
|----|-------------|-------------|-------------|
| C  | -3.89555700 | -0.04933600 | -0.12238300 |
| C  | -3.32304700 | -0.19199800 | 1.12675700  |
| C  | -1.94578500 | -0.40703800 | 1.16179600  |
| C  | -1.14998600 | -0.48042800 | -0.01009100 |
| C  | -1.77994500 | -0.32627700 | -1.25304700 |
| C  | -3.14634800 | -0.11315800 | -1.30609700 |
| C  | 0.21215000  | -0.70943000 | 0.40716000  |
| C  | 0.18731800  | -0.76049600 | 1.77556100  |
| N  | -1.10317200 | -0.58390800 | 2.23268400  |
| C  | 1.39875700  | -0.88715600 | -0.51349300 |
| C  | 2.13149900  | -2.24502400 | -0.30916100 |
| C  | 1.16774800  | -3.40936800 | -0.57515200 |
| C  | 3.37216600  | -2.39237300 | -1.19984000 |
| C  | 2.35820800  | 0.34744100  | -0.53903800 |
| C  | 1.54442300  | 1.59408300  | -0.87847400 |
| C  | 3.27219900  | 0.55030000  | 0.67476700  |
| O  | 1.08318400  | 1.80861600  | -1.97093100 |
| O  | 3.13965700  | -0.06365500 | 1.70867400  |
| O  | 1.37806500  | 2.40823400  | 0.17714500  |
| C  | 0.55028100  | 3.56741600  | -0.04882100 |
| C  | 4.42368600  | 1.51633600  | 0.48120100  |
| Cl | -5.63239400 | 0.22756400  | -0.23559300 |
| H  | -3.92299600 | -0.13805900 | 2.02577300  |
| H  | -1.20890900 | -0.35701100 | -2.17279200 |
| H  | -3.64702600 | 0.01060700  | -2.25661500 |
| H  | 1.00234900  | -0.89377300 | 2.46590500  |
| H  | -1.37425700 | -0.56679200 | 3.20076200  |
| H  | 0.99564700  | -0.91392500 | -1.53161200 |
| H  | 2.45428200  | -2.29811100 | 0.73303700  |
| H  | 0.84291100  | -3.41732200 | -1.62058200 |
| H  | 1.65838200  | -4.36474800 | -0.37426800 |
| H  | 0.27722900  | -3.35024600 | 0.05122800  |
| H  | 3.79169200  | -3.39573300 | -1.09721400 |
| H  | 4.16657500  | -1.68914700 | -0.94112600 |
| H  | 3.12300700  | -2.24875800 | -2.25658500 |
| H  | 3.02087900  | 0.22804100  | -1.40141800 |
| H  | 0.53565200  | 4.10017100  | 0.89811600  |
| H  | 0.97520700  | 4.18846400  | -0.83660800 |
| H  | -0.45411200 | 3.25762300  | -0.33353900 |
| H  | 4.11783800  | 2.41720700  | -0.05237200 |
| H  | 4.84902700  | 1.77818400  | 1.44819700  |
| H  | 5.19566600  | 1.02558300  | -0.12097400 |

Compound **1a**, optimization level PCM-B3LYP/6-311++G(2d,p)

## Conformation #9

|    |             |             |             |
|----|-------------|-------------|-------------|
| C  | -4.36105800 | -0.21737200 | -0.36643500 |
| C  | -3.90410300 | 0.62885400  | 0.62579400  |
| C  | -2.52560600 | 0.66577100  | 0.83045600  |
| C  | -1.61872700 | -0.11557200 | 0.07146800  |
| C  | -2.13212200 | -0.95797600 | -0.92394100 |
| C  | -3.49826200 | -1.00654600 | -1.14050700 |
| C  | -0.28923500 | 0.18622400  | 0.54310000  |
| C  | -0.44192300 | 1.11071700  | 1.54225200  |
| N  | -1.78089300 | 1.39787400  | 1.72406900  |
| C  | 0.97961100  | -0.45719500 | 0.03732800  |
| C  | 1.16850000  | -1.86349200 | 0.70408700  |
| C  | 2.13069800  | -2.78915800 | -0.05250500 |
| C  | 1.53763400  | -1.79832200 | 2.19045700  |
| C  | 2.20174400  | 0.49131200  | 0.17900500  |
| C  | 3.41103200  | 0.00283300  | -0.60634800 |
| C  | 1.91652600  | 1.93878700  | -0.30545500 |
| O  | 3.40814000  | -0.26746000 | -1.78307700 |
| O  | 2.19384300  | 2.86533300  | 0.42136300  |
| O  | 4.51254200  | -0.04287300 | 0.16417800  |
| C  | 5.72927500  | -0.42623100 | -0.50629400 |
| C  | 1.32641200  | 2.14131800  | -1.67846400 |
| Cl | -6.09208100 | -0.30987700 | -0.67403100 |
| H  | -4.59133400 | 1.22884000  | 1.20766000  |
| H  | -1.47430200 | -1.57149500 | -1.52807300 |
| H  | -3.91239500 | -1.64975700 | -1.90479600 |
| H  | 0.30148700  | 1.61375400  | 2.13881000  |
| H  | -2.14115400 | 2.08495000  | 2.36377900  |
| H  | 0.84898900  | -0.64144300 | -1.03363000 |
| H  | 0.17689500  | -2.32348400 | 0.64035600  |
| H  | 3.17431300  | -2.49406300 | 0.07453200  |
| H  | 2.04059100  | -3.80828800 | 0.33202000  |
| H  | 1.91724100  | -2.81269400 | -1.12300000 |
| H  | 1.49022600  | -2.79682200 | 2.63145800  |
| H  | 0.85368600  | -1.15801500 | 2.75063400  |
| H  | 2.55517600  | -1.42784800 | 2.34001100  |
| H  | 2.49532900  | 0.59452100  | 1.22146600  |
| H  | 6.50053500  | -0.40007700 | 0.25864000  |
| H  | 5.63268300  | -1.42804000 | -0.92382500 |
| H  | 5.95599300  | 0.27645000  | -1.30727100 |
| H  | 1.86760400  | 1.55493700  | -2.42252800 |
| H  | 0.28898800  | 1.79705000  | -1.68306600 |
| H  | 1.35249100  | 3.20060400  | -1.92683000 |

Compound **1a**, optimization level PCM-B3LYP/6-311++G(2d,p)

## Conformation #16

|    |             |             |             |
|----|-------------|-------------|-------------|
| C  | 4.17104400  | -0.19499400 | -0.47562700 |
| C  | 3.78761800  | -0.09070900 | 0.84685200  |
| C  | 2.42718400  | 0.09975700  | 1.08833900  |
| C  | 1.46919900  | 0.18996800  | 0.04847300  |
| C  | 1.90889100  | 0.06837200  | -1.27635500 |
| C  | 3.25413000  | -0.12157200 | -1.53483800 |
| C  | 0.17869800  | 0.38405300  | 0.66142700  |
| C  | 0.40243100  | 0.39435900  | 2.01408300  |
| N  | 1.74909100  | 0.22619100  | 2.27708500  |
| C  | -1.13708700 | 0.54893200  | -0.06543200 |
| C  | -1.65549800 | 2.01978400  | -0.10635900 |
| C  | -2.00574200 | 2.61209000  | 1.26373500  |
| C  | -0.66974000 | 2.92917200  | -0.84900600 |
| C  | -2.18607200 | -0.44404100 | 0.49120800  |
| C  | -3.57668500 | -0.32742100 | -0.12640700 |
| C  | -1.73371700 | -1.91451000 | 0.29065500  |
| O  | -4.60066200 | -0.32469000 | 0.51394100  |
| O  | -1.11973500 | -2.25400500 | -0.68974200 |
| O  | -3.53481700 | -0.27571400 | -1.46688300 |
| C  | -4.80963000 | -0.21678200 | -2.13420700 |
| C  | -2.13068500 | -2.88158900 | 1.37960600  |
| Cl | 5.87532600  | -0.43460700 | -0.85021200 |
| H  | 4.51374000  | -0.15712300 | 1.64634800  |
| H  | 1.20650800  | 0.11054500  | -2.09930600 |
| H  | 3.61103300  | -0.22037600 | -2.55079700 |
| H  | -0.29065300 | 0.51189300  | 2.83150600  |
| H  | 2.16172600  | 0.19718500  | 3.19334800  |
| H  | -0.96892400 | 0.25097500  | -1.10174100 |
| H  | -2.57593000 | 1.99750800  | -0.69913500 |
| H  | -1.11759800 | 2.71231600  | 1.89196200  |
| H  | -2.43151400 | 3.61079400  | 1.14014600  |
| H  | -2.74359100 | 2.01287800  | 1.80241700  |
| H  | -1.08138800 | 3.93632500  | -0.95136600 |
| H  | -0.45664800 | 2.55298500  | -1.85262400 |
| H  | 0.27926600  | 3.00973200  | -0.31387400 |
| H  | -2.34659000 | -0.28550200 | 1.55722200  |
| H  | -4.57880500 | -0.19526700 | -3.19578100 |
| H  | -5.40623500 | -1.09416100 | -1.88710500 |
| H  | -5.35149100 | 0.68102200  | -1.83800100 |
| H  | -3.19035100 | -2.77083200 | 1.62478900  |
| H  | -1.91411900 | -3.90298700 | 1.07262600  |
| H  | -1.56692400 | -2.64686500 | 2.28796900  |

Compound **1a**, optimization level PCM-B3LYP/6-311++G(2d,p)

## Conformation #19

|    |             |             |             |
|----|-------------|-------------|-------------|
| C  | -3.88604700 | -0.57655200 | -0.43224400 |
| C  | -3.71335400 | 0.25552200  | 0.65553600  |
| C  | -2.42107800 | 0.72233200  | 0.89184700  |
| C  | -1.31037400 | 0.38575500  | 0.07069800  |
| C  | -1.54732500 | -0.46260500 | -1.02368800 |
| C  | -2.82278300 | -0.93988900 | -1.26990400 |
| C  | -0.14950500 | 1.04169200  | 0.63604300  |
| C  | -0.60149100 | 1.71494800  | 1.73827500  |
| N  | -1.95973700 | 1.54159400  | 1.89225200  |
| C  | 1.30490000  | 1.02592400  | 0.21628300  |
| C  | 1.64114500  | 1.92908700  | -1.01093500 |
| C  | 0.98602700  | 1.51113700  | -2.33240200 |
| C  | 1.32992500  | 3.39842900  | -0.70302300 |
| C  | 1.83095800  | -0.42381400 | 0.07358000  |
| C  | 3.33390000  | -0.48602800 | -0.16971600 |
| C  | 1.58354300  | -1.23611200 | 1.37653600  |
| O  | 4.14230000  | 0.33041000  | 0.18524700  |
| O  | 1.89079000  | -0.78061100 | 2.45028200  |
| O  | 3.66176700  | -1.63182900 | -0.80979500 |
| C  | 5.07090500  | -1.83911500 | -1.02892200 |
| C  | 0.96643500  | -2.60237600 | 1.21497700  |
| Cl | -5.49312000 | -1.20398100 | -0.78236700 |
| H  | -4.54688400 | 0.52510200  | 1.29086400  |
| H  | -0.74734700 | -0.74725800 | -1.69356000 |
| H  | -3.01082000 | -1.59217700 | -2.11178800 |
| H  | -0.04039700 | 2.30227600  | 2.44759600  |
| H  | -2.51066700 | 1.90995200  | 2.64845400  |
| H  | 1.86785400  | 1.44669400  | 1.05270000  |
| H  | 2.72389800  | 1.85707000  | -1.14014200 |
| H  | -0.10020400 | 1.61463300  | -2.29598400 |
| H  | 1.34851700  | 2.14765000  | -3.14354200 |
| H  | 1.22117200  | 0.47978800  | -2.60800200 |
| H  | 1.66942000  | 4.03911100  | -1.52066700 |
| H  | 1.83456700  | 3.72873100  | 0.20863000  |
| H  | 0.25747500  | 3.56267300  | -0.57329900 |
| H  | 1.34698900  | -0.95045100 | -0.74762400 |
| H  | 5.14820300  | -2.79964100 | -1.53151300 |
| H  | 5.47729000  | -1.04454000 | -1.65376600 |
| H  | 5.60320400  | -1.85601000 | -0.07848400 |
| H  | -0.04086900 | -2.49795900 | 0.80108200  |
| H  | 1.54704200  | -3.19448800 | 0.50260700  |
| H  | 0.91920200  | -3.10840100 | 2.17739000  |

Compound **1a**, optimization level PCM-B3LYP/6-311++G(2d,p)

## Conformation #33

|    |             |             |             |
|----|-------------|-------------|-------------|
| C  | 4.15235800  | 0.09182500  | 0.44223800  |
| C  | 3.69122000  | 0.50288900  | -0.79373400 |
| C  | 2.34193200  | 0.27769400  | -1.06340000 |
| C  | 1.46990500  | -0.34244900 | -0.13353700 |
| C  | 1.98632300  | -0.74206700 | 1.10677200  |
| C  | 3.32310100  | -0.52412700 | 1.39097800  |
| C  | 0.16774700  | -0.41933300 | -0.74611800 |
| C  | 0.29704300  | 0.14638000  | -1.98601600 |
| N  | 1.59970700  | 0.56810600  | -2.18296700 |
| C  | -1.08345500 | -0.96479900 | -0.09832000 |
| C  | -1.95316900 | -1.79044300 | -1.08706200 |
| C  | -1.17427600 | -3.03388100 | -1.54404100 |
| C  | -3.30961200 | -2.22281200 | -0.51956100 |
| C  | -1.78524700 | 0.19542500  | 0.68130900  |
| C  | -2.41938500 | 1.25108900  | -0.20451900 |
| C  | -2.70467300 | -0.29798600 | 1.82604000  |
| O  | -3.12762500 | 1.04793300  | -1.16069000 |
| O  | -2.36101800 | -1.24741200 | 2.48923200  |
| O  | -2.10408300 | 2.49343300  | 0.22245800  |
| C  | -2.67226800 | 3.57867000  | -0.53351000 |
| C  | -3.95702700 | 0.48330400  | 2.14347000  |
| Cl | 5.84769000  | 0.34934000  | 0.84454600  |
| H  | 4.35361600  | 0.97425300  | -1.50787000 |
| H  | 1.35312200  | -1.22142900 | 1.84404100  |
| H  | 3.74046400  | -0.82630700 | 2.34170800  |
| H  | -0.43856000 | 0.28308600  | -2.76205600 |
| H  | 1.95167600  | 0.98545400  | -3.02714000 |
| H  | -0.77232500 | -1.65131200 | 0.69443800  |
| H  | -2.15533500 | -1.16917200 | -1.96284700 |
| H  | -0.99567800 | -3.70968500 | -0.70193800 |
| H  | -1.74471600 | -3.58626100 | -2.29466500 |
| H  | -0.20725700 | -2.77729600 | -1.97822900 |
| H  | -3.84042300 | -2.82842500 | -1.25839900 |
| H  | -3.94970400 | -1.36912100 | -0.29346200 |
| H  | -3.19533700 | -2.82463800 | 0.38474500  |
| H  | -0.99100800 | 0.70951000  | 1.23290100  |
| H  | -2.31688800 | 4.48539700  | -0.05122600 |
| H  | -2.33477000 | 3.53605000  | -1.56845700 |
| H  | -3.76079200 | 3.53034200  | -0.51042800 |
| H  | -4.46101000 | 0.03328700  | 2.99619300  |
| H  | -3.69804600 | 1.52114600  | 2.37183800  |
| H  | -4.62698700 | 0.50168000  | 1.28040000  |



Compound **1a**, optimization level PCM-B3LYP/6-311++G(2d,p)

## Conformation #35

|    |             |             |             |
|----|-------------|-------------|-------------|
| C  | 4.21568500  | -0.26937900 | -0.38882000 |
| C  | 3.77756400  | -0.16469900 | 0.91659400  |
| C  | 2.41481700  | 0.06947800  | 1.09959800  |
| C  | 1.50802900  | 0.20163900  | 0.01932300  |
| C  | 2.00153700  | 0.07783600  | -1.28630700 |
| C  | 3.34990300  | -0.15497900 | -1.48679300 |
| C  | 0.19832600  | 0.43479000  | 0.57574300  |
| C  | 0.36156700  | 0.42593900  | 1.93714600  |
| N  | 1.68865000  | 0.20787000  | 2.25846900  |
| C  | -1.07582100 | 0.65329600  | -0.20989900 |
| C  | -1.55881100 | 2.13676900  | -0.22838600 |
| C  | -1.96935400 | 2.69442700  | 1.13968500  |
| C  | -0.51008300 | 3.04390000  | -0.88259000 |
| C  | -2.17296800 | -0.33730400 | 0.24570200  |
| C  | -3.44212800 | -0.25232100 | -0.59369700 |
| C  | -1.67731100 | -1.80503000 | 0.11756400  |
| O  | -3.50552200 | 0.09503700  | -1.74315700 |
| O  | -1.12459000 | -2.18107700 | -0.88548600 |
| O  | -4.51213800 | -0.67418900 | 0.11892800  |
| C  | -5.76141000 | -0.70745500 | -0.59911400 |
| C  | -1.94432700 | -2.71496700 | 1.29144100  |
| Cl | 5.92601000  | -0.56288900 | -0.69002100 |
| H  | 4.46488800  | -0.26310300 | 1.74651300  |
| H  | 1.33817500  | 0.15203700  | -2.13884800 |
| H  | 3.74826400  | -0.25582400 | -2.48701300 |
| H  | -0.36266500 | 0.56271400  | 2.72398200  |
| H  | 2.06027600  | 0.16511000  | 3.19157800  |
| H  | -0.86485000 | 0.38966900  | -1.24789400 |
| H  | -2.44120700 | 2.15321500  | -0.87283800 |
| H  | -1.11518400 | 2.76285800  | 1.81758900  |
| H  | -2.37394500 | 3.70292300  | 1.02429200  |
| H  | -2.74284200 | 2.09286600  | 1.62467700  |
| H  | -0.89194200 | 4.06378600  | -0.97424200 |
| H  | -0.25239300 | 2.69497700  | -1.88535800 |
| H  | 0.40980400  | 3.08371800  | -0.29424600 |
| H  | -2.45691300 | -0.16758500 | 1.28450800  |
| H  | -6.49459600 | -1.08037100 | 0.11120700  |
| H  | -6.02898100 | 0.29257300  | -0.93854800 |
| H  | -5.68530800 | -1.37029900 | -1.46035900 |
| H  | -3.00296800 | -2.68194800 | 1.56141700  |
| H  | -1.64524800 | -3.73355500 | 1.05157700  |
| H  | -1.37836800 | -2.35954100 | 2.15766600  |

Compound **1a**, optimization level PCM-B3LYP/6-311++G(2d,p)

## Conformation #46

|    |             |             |             |
|----|-------------|-------------|-------------|
| C  | -3.91466700 | -0.57557000 | -0.40451600 |
| C  | -3.74645800 | 0.40431200  | 0.55207200  |
| C  | -2.44197900 | 0.84349100  | 0.77604900  |
| C  | -1.31937900 | 0.33518500  | 0.07108400  |
| C  | -1.55018200 | -0.66561700 | -0.88638800 |
| C  | -2.83653000 | -1.11456100 | -1.12042900 |
| C  | -0.15129200 | 1.02505500  | 0.57832400  |
| C  | -0.61252300 | 1.88496800  | 1.54033000  |
| N  | -1.98163600 | 1.78915900  | 1.66048700  |
| C  | 1.30796900  | 0.92398500  | 0.19324800  |
| C  | 1.69226400  | 1.74268300  | -1.08246800 |
| C  | 0.98298300  | 1.30247300  | -2.36786200 |
| C  | 1.49792800  | 3.24532200  | -0.85093800 |
| C  | 1.81205900  | -0.54348000 | 0.09957000  |
| C  | 3.32765700  | -0.57807700 | -0.04926300 |
| C  | 1.44585200  | -1.42080500 | 1.32326600  |
| O  | 4.10670700  | 0.01416800  | 0.65917200  |
| O  | 0.93299400  | -2.49974500 | 1.14283000  |
| O  | 3.70407200  | -1.38130800 | -1.05875600 |
| C  | 5.12547000  | -1.52569600 | -1.24869000 |
| C  | 1.76495300  | -0.90375000 | 2.70530500  |
| Cl | -5.53607300 | -1.17390000 | -0.73755900 |
| H  | -4.59049900 | 0.80519100  | 1.09778500  |
| H  | -0.73566500 | -1.10356700 | -1.44589700 |
| H  | -3.02114500 | -1.88855400 | -1.85257500 |
| H  | -0.05719200 | 2.57482700  | 2.15650300  |
| H  | -2.54692000 | 2.30607300  | 2.31177400  |
| H  | 1.87628500  | 1.38344300  | 1.00698700  |
| H  | 2.76699000  | 1.58426500  | -1.22600700 |
| H  | -0.09479100 | 1.46449000  | -2.30506400 |
| H  | 1.35529300  | 1.88367500  | -3.21509000 |
| H  | 1.15555500  | 0.24974000  | -2.60053400 |
| H  | 1.86833600  | 3.81343900  | -1.70762500 |
| H  | 2.04163700  | 3.58705900  | 0.03392100  |
| H  | 0.44274900  | 3.49486400  | -0.71749600 |
| H  | 1.38213100  | -1.05801800 | -0.75546200 |
| H  | 5.23627800  | -2.20186300 | -2.09196600 |
| H  | 5.57865200  | -0.55907200 | -1.46593700 |
| H  | 5.58464000  | -1.94585800 | -0.35459600 |
| H  | 2.76203000  | -0.46188300 | 2.73934100  |
| H  | 1.04778100  | -0.12162700 | 2.96761700  |
| H  | 1.67761700  | -1.71886400 | 3.42128300  |

Compound **1a**, optimization level PCM-B3LYP/6-311++G(2d,p)

## Conformation #59

|    |             |             |             |
|----|-------------|-------------|-------------|
| C  | 4.19842100  | -0.06166000 | -0.51994700 |
| C  | 3.80732000  | -0.40472700 | 0.75995500  |
| C  | 2.45354000  | -0.26004200 | 1.06011900  |
| C  | 1.50625900  | 0.21352300  | 0.11693600  |
| C  | 1.95451000  | 0.55074200  | -1.16781000 |
| C  | 3.29480000  | 0.41159000  | -1.48261400 |
| C  | 0.21931300  | 0.22293700  | 0.76595100  |
| C  | 0.43375500  | -0.23115100 | 2.04024400  |
| N  | 1.77205700  | -0.51460700 | 2.22620000  |
| C  | -1.09339200 | 0.66957500  | 0.16355500  |
| C  | -1.50616900 | 2.07108200  | 0.71917300  |
| C  | -0.42312800 | 3.11893700  | 0.43035400  |
| C  | -2.85736900 | 2.58283000  | 0.20289200  |
| C  | -2.21911800 | -0.39033400 | 0.37488100  |
| C  | -3.32271000 | -0.27322300 | -0.66831000 |
| C  | -1.71834800 | -1.85928600 | 0.33728600  |
| O  | -3.14827300 | -0.05214000 | -1.84207800 |
| O  | -1.90521200 | -2.57007200 | 1.29743600  |
| O  | -4.53156000 | -0.51167600 | -0.12853400 |
| C  | -5.64266800 | -0.49246500 | -1.04540400 |
| C  | -1.03345400 | -2.36017400 | -0.91074600 |
| Cl | 5.89463600  | -0.22380800 | -0.96306900 |
| H  | 4.52455100  | -0.76745000 | 1.48443400  |
| H  | 1.26524000  | 0.91878500  | -1.91826700 |
| H  | 3.65784500  | 0.66561300  | -2.46905800 |
| H  | -0.26886000 | -0.39934100 | 2.84058000  |
| H  | 2.16613200  | -0.91678500 | 3.05937300  |
| H  | -0.95297900 | 0.76792500  | -0.91665400 |
| H  | -1.58364200 | 1.96094900  | 1.80816200  |
| H  | -0.31027900 | 3.27429500  | -0.64702500 |
| H  | -0.69816400 | 4.07908100  | 0.87313300  |
| H  | 0.54819400  | 2.83044800  | 0.83168200  |
| H  | -3.04748400 | 3.58281900  | 0.60015400  |
| H  | -3.69418400 | 1.95528000  | 0.51357100  |
| H  | -2.86712700 | 2.65141400  | -0.88772300 |
| H  | -2.66815800 | -0.27800100 | 1.36162600  |
| H  | -6.51828900 | -0.71599600 | -0.44206700 |
| H  | -5.73340000 | 0.48955500  | -1.50877400 |
| H  | -5.50670300 | -1.24492300 | -1.82139300 |
| H  | -0.92782000 | -3.44175500 | -0.85113600 |
| H  | -1.58552200 | -2.07470000 | -1.80755700 |
| H  | -0.04157400 | -1.90804200 | -0.98798800 |

Compound **1a**, optimization level PCM-B3LYP/6-311++G(2d,p)

## Conformation #99

|    |             |             |             |
|----|-------------|-------------|-------------|
| C  | -3.99121900 | -0.33773400 | -0.38527900 |
| C  | -3.71202700 | 0.28443000  | 0.81418900  |
| C  | -2.37347500 | 0.59396400  | 1.05936300  |
| C  | -1.32639200 | 0.30030500  | 0.14145100  |
| C  | -1.67464100 | -0.33363900 | -1.06309600 |
| C  | -2.99689800 | -0.65066100 | -1.32270800 |
| C  | -0.09488500 | 0.76041700  | 0.74762000  |
| C  | -0.45159100 | 1.28885200  | 1.96260300  |
| N  | -1.80915500 | 1.19897900  | 2.15257200  |
| C  | 1.33443000  | 0.72740900  | 0.25116300  |
| C  | 1.69323100  | 1.85508000  | -0.76930900 |
| C  | 0.90764300  | 1.81311500  | -2.08460800 |
| C  | 1.57498000  | 3.23772800  | -0.11815700 |
| C  | 1.73730900  | -0.68093200 | -0.27652600 |
| C  | 3.19591700  | -0.75879100 | -0.72166000 |
| C  | 1.46297500  | -1.82793000 | 0.72271300  |
| O  | 3.54468700  | -1.19323000 | -1.79606500 |
| O  | 0.89669800  | -2.82601100 | 0.32551600  |
| O  | 4.04575600  | -0.31627000 | 0.21200000  |
| C  | 5.45289800  | -0.36932200 | -0.11756900 |
| C  | 1.90836900  | -1.68941900 | 2.15442800  |
| Cl | -5.66698000 | -0.75837200 | -0.75953200 |
| H  | -4.49120500 | 0.51871800  | 1.52724900  |
| H  | -0.92838700 | -0.58004000 | -1.80559600 |
| H  | -3.26907700 | -1.13921800 | -2.24843700 |
| H  | 0.17499900  | 1.73117400  | 2.72103700  |
| H  | -2.30240000 | 1.51055400  | 2.97364900  |
| H  | 1.96333400  | 0.92385900  | 1.12297300  |
| H  | 2.75160100  | 1.71379400  | -1.01512700 |
| H  | 1.27578800  | 2.59031400  | -2.75859600 |
| H  | -0.15596800 | 1.99639700  | -1.91933700 |
| H  | 1.01252300  | 0.85915500  | -2.60550600 |
| H  | 1.93341000  | 4.01005400  | -0.80283100 |
| H  | 2.16769200  | 3.30075200  | 0.79817200  |
| H  | 0.53803400  | 3.47059500  | 0.13521600  |
| H  | 1.16411700  | -0.93913700 | -1.16296000 |
| H  | 5.75104600  | -1.39625200 | -0.32137600 |
| H  | 5.65605400  | 0.25494700  | -0.98610700 |
| H  | 5.96766200  | 0.01374000  | 0.75838200  |
| H  | 2.92432200  | -1.29957100 | 2.21767000  |
| H  | 1.83866800  | -2.65510800 | 2.65132300  |
| H  | 1.25365600  | -0.97840600 | 2.66494400  |

Compound **1a**, optimization level PCM-M06-2X/6-311++G(2d,p)

Conformation #1

|    |             |             |             |
|----|-------------|-------------|-------------|
| C  | 4.22463600  | -0.02880100 | -0.36385600 |
| C  | 3.76274900  | -0.29190200 | 0.90579400  |
| C  | 2.38328300  | -0.19554500 | 1.09333000  |
| C  | 1.49703800  | 0.15575300  | 0.05014300  |
| C  | 2.01847900  | 0.40993600  | -1.22503100 |
| C  | 3.38019600  | 0.31666400  | -1.42948800 |
| C  | 0.16777400  | 0.14802100  | 0.59928800  |
| C  | 0.30476200  | -0.20500000 | 1.91388800  |
| N  | 1.63017600  | -0.40556300 | 2.21612500  |
| C  | -1.10108000 | 0.45670500  | -0.14568400 |
| C  | -1.56173500 | 1.93055800  | -0.01125300 |
| C  | -1.94816600 | 2.32030700  | 1.41370000  |
| C  | -0.49237800 | 2.87758100  | -0.55095200 |
| C  | -2.21670000 | -0.52746100 | 0.26408800  |
| C  | -3.45371700 | -0.27494900 | -0.57634500 |
| C  | -1.80064600 | -1.99394000 | 0.09247800  |
| O  | -3.47460700 | -0.32129800 | -1.78104000 |
| O  | -2.05860000 | -2.78868500 | 0.96557300  |
| O  | -4.51524300 | 0.01528400  | 0.17009000  |
| C  | -5.72396400 | 0.28855400  | -0.55373400 |
| C  | -1.08564700 | -2.38756000 | -1.16851200 |
| H  | 4.43602900  | -0.56107300 | 1.70834100  |
| H  | 1.36801000  | 0.67802500  | -2.04905800 |
| H  | 3.80796300  | 0.50723500  | -2.40415100 |
| H  | -0.44685800 | -0.33813800 | 2.67658700  |
| H  | 1.98349300  | -0.68192700 | 3.11797900  |
| H  | -0.91109900 | 0.29198500  | -1.21162000 |
| H  | -2.44831000 | 2.03880900  | -0.64718100 |
| H  | -2.25717300 | 3.36663100  | 1.43892700  |
| H  | -1.09707500 | 2.20748000  | 2.08932500  |
| H  | -2.77696200 | 1.72403100  | 1.79902700  |
| H  | -0.21806600 | 2.62507700  | -1.57749000 |
| H  | 0.40987000  | 2.83250100  | 0.06375100  |
| H  | -0.85715000 | 3.90595000  | -0.54074800 |
| H  | -2.48362300 | -0.40765400 | 1.31255100  |
| H  | -6.47252400 | 0.51118500  | 0.19922100  |
| H  | -6.01238600 | -0.58283500 | -1.13817000 |
| H  | -5.57528900 | 1.14138600  | -1.21349700 |
| H  | -0.06991000 | -1.98334700 | -1.13783900 |
| H  | -1.58615800 | -1.95856000 | -2.03720000 |
| H  | -1.04141900 | -3.47123800 | -1.24047600 |
| Cl | 5.94680600  | -0.13191300 | -0.67089800 |

Compound **1a**, optimization level PCM-M06-2X/6-311++G(2d,p)

Conformation #4

|    |             |             |             |
|----|-------------|-------------|-------------|
| C  | -3.80699000 | -0.13340000 | -0.03003200 |
| C  | -3.22668200 | -0.53663000 | 1.15096500  |
| C  | -1.84268200 | -0.71821700 | 1.12896500  |
| C  | -1.06412200 | -0.49810400 | -0.03071200 |
| C  | -1.70663000 | -0.09235500 | -1.20836400 |
| C  | -3.07474400 | 0.08841400  | -1.20619600 |
| C  | 0.30485200  | -0.77532200 | 0.31448900  |
| C  | 0.29533700  | -1.14341500 | 1.63119900  |
| N  | -0.98921200 | -1.11408300 | 2.12144300  |
| C  | 1.48001300  | -0.66695300 | -0.62213700 |
| C  | 2.31438700  | -1.96329700 | -0.69417600 |
| C  | 1.45874900  | -3.08380700 | -1.28474900 |
| C  | 3.58184100  | -1.78235600 | -1.52742200 |
| C  | 2.32469300  | 0.61021700  | -0.36460100 |
| C  | 1.39056200  | 1.78644800  | -0.15577700 |
| C  | 3.29275200  | 0.55629800  | 0.81325300  |
| O  | 1.29213500  | 2.41603500  | 0.86743900  |
| O  | 3.20201600  | -0.28036000 | 1.67917000  |
| O  | 0.65726200  | 2.01992200  | -1.24095500 |
| C  | -0.36342800 | 3.01647300  | -1.09574400 |
| C  | 4.38448000  | 1.59087000  | 0.80945200  |
| Cl | -5.54198500 | 0.11600900  | -0.07391800 |
| H  | -3.81584200 | -0.70202400 | 2.04298900  |
| H  | -1.14002200 | 0.09137200  | -2.11346800 |
| H  | -3.59308100 | 0.40358600  | -2.10149600 |
| H  | 1.11798000  | -1.42110100 | 2.26873600  |
| H  | -1.25154000 | -1.33235300 | 3.06907000  |
| H  | 1.06492000  | -0.51647100 | -1.62489100 |
| H  | 2.60115700  | -2.24107300 | 0.32238700  |
| H  | 0.53969100  | -3.22764200 | -0.71473500 |
| H  | 1.18566300  | -2.84824400 | -2.31769200 |
| H  | 2.00955400  | -4.02582800 | -1.28918300 |
| H  | 4.08664900  | -2.74073500 | -1.65885400 |
| H  | 4.29602200  | -1.10039100 | -1.06120500 |
| H  | 3.33832100  | -1.39344100 | -2.52099700 |
| H  | 2.91074000  | 0.83057500  | -1.26264100 |
| H  | 0.08426800  | 3.98050900  | -0.86236700 |
| H  | -0.87726000 | 3.05184500  | -2.05121300 |
| H  | -1.05152800 | 2.72260900  | -0.30387500 |
| H  | 3.97154100  | 2.58047900  | 0.61080600  |
| H  | 4.91309900  | 1.58239600  | 1.75925400  |
| H  | 5.08226600  | 1.35840300  | 0.00017200  |

Compound **1a**, optimization level PCM-M06-2X/6-311++G(2d,p)

## Conformation #6

|    |             |             |             |
|----|-------------|-------------|-------------|
| C  | 4.15297100  | -0.07651500 | -0.47110700 |
| C  | 3.75462800  | -0.29659500 | 0.82783600  |
| C  | 2.38741800  | -0.17955200 | 1.08256700  |
| C  | 1.45218400  | 0.15097300  | 0.07599500  |
| C  | 1.90968000  | 0.36061300  | -1.23133300 |
| C  | 3.25805600  | 0.24596500  | -1.50227300 |
| C  | 0.15262100  | 0.17428800  | 0.69192200  |
| C  | 0.35354200  | -0.14198000 | 2.00781100  |
| N  | 1.69078500  | -0.34845000 | 2.24784900  |
| C  | -1.14931700 | 0.47690600  | 0.00248700  |
| C  | -1.58313300 | 1.96112900  | 0.11077300  |
| C  | -1.92467700 | 2.38914400  | 1.53620200  |
| C  | -0.51791000 | 2.87949100  | -0.48318200 |
| C  | -2.24864300 | -0.47624300 | 0.51329900  |
| C  | -3.58866600 | -0.17477900 | -0.13092500 |
| C  | -1.91036900 | -1.96039000 | 0.30669900  |
| O  | -4.58220700 | 0.12557900  | 0.47915500  |
| O  | -2.22999700 | -2.75616600 | 1.15826400  |
| O  | -3.53887300 | -0.27434600 | -1.45878600 |
| C  | -4.76048800 | 0.01889700  | -2.15124700 |
| C  | -1.19872500 | -2.37703300 | -0.94977300 |
| H  | 4.46559200  | -0.54847100 | 1.60312900  |
| H  | 1.22033200  | 0.61075300  | -2.02899300 |
| H  | 3.63692400  | 0.40241200  | -2.50290300 |
| H  | -0.35821200 | -0.24341400 | 2.81236000  |
| H  | 2.08649000  | -0.60384700 | 3.13819200  |
| H  | -1.01303800 | 0.27628700  | -1.06498100 |
| H  | -2.48637300 | 2.06637600  | -0.50219600 |
| H  | -2.20737800 | 3.44310000  | 1.54789700  |
| H  | -1.06022500 | 2.26830300  | 2.19341000  |
| H  | -2.75835700 | 1.82015400  | 1.95124300  |
| H  | -0.27238600 | 2.59459800  | -1.50854400 |
| H  | 0.39934300  | 2.84216500  | 0.10931800  |
| H  | -0.87173100 | 3.91166700  | -0.49384700 |
| H  | -2.40467700 | -0.35202500 | 1.58371200  |
| H  | -4.54110300 | -0.11722300 | -3.20499100 |
| H  | -5.06161600 | 1.04544400  | -1.95016700 |
| H  | -5.54391500 | -0.66401600 | -1.82901200 |
| H  | -0.17157200 | -2.00379400 | -0.91724600 |
| H  | -1.68085900 | -1.94029000 | -1.82473800 |
| H  | -1.18905200 | -3.46178000 | -1.01772800 |
| Cl | 5.85587700  | -0.20668800 | -0.86308300 |

Compound **1a**, optimization level PCM-M06-2X/6-311++G(2d,p)

## Conformation #7

|    |             |             |             |
|----|-------------|-------------|-------------|
| C  | -3.92463200 | -0.30222300 | -0.41467300 |
| C  | -3.66676300 | 0.31846600  | 0.78470600  |
| C  | -2.33275300 | 0.63468100  | 1.04635600  |
| C  | -1.27862700 | 0.34964200  | 0.14322000  |
| C  | -1.60577500 | -0.28113900 | -1.06902100 |
| C  | -2.91837000 | -0.60665300 | -1.34206700 |
| C  | -0.05919000 | 0.80833000  | 0.76856700  |
| C  | -0.42990000 | 1.32638900  | 1.97748400  |
| N  | -1.78735600 | 1.23525500  | 2.14678500  |
| C  | 1.36906100  | 0.74162800  | 0.29428300  |
| C  | 1.74881800  | 1.80985500  | -0.75767500 |
| C  | 1.02341800  | 1.65680700  | -2.09265000 |
| C  | 1.53263000  | 3.21222800  | -0.19400800 |
| C  | 1.71420400  | -0.69173800 | -0.16678200 |
| C  | 3.14042500  | -0.79972300 | -0.66905400 |
| C  | 1.49618300  | -1.67900300 | 0.99182000  |
| O  | 3.43901900  | -1.25071300 | -1.74707800 |
| O  | 1.99937100  | -1.48779100 | 2.07085600  |
| O  | 4.02622300  | -0.33670500 | 0.20694100  |
| C  | 5.39629300  | -0.38691500 | -0.21198300 |
| C  | 0.61985900  | -2.85919100 | 0.69465200  |
| H  | -4.45762100 | 0.54589800  | 1.48702000  |
| H  | -0.84891300 | -0.51213300 | -1.80685500 |
| H  | -3.18221800 | -1.09271700 | -2.27130600 |
| H  | 0.19134400  | 1.75772500  | 2.74707400  |
| H  | -2.29469000 | 1.53893700  | 2.96223400  |
| H  | 1.99676400  | 0.93037100  | 1.16955000  |
| H  | 2.82317600  | 1.69287500  | -0.94136400 |
| H  | 1.38123600  | 2.41057100  | -2.79635300 |
| H  | -0.05183000 | 1.80228400  | -1.96842400 |
| H  | 1.19273600  | 0.67826100  | -2.54744600 |
| H  | 1.92242500  | 3.96289400  | -0.88359500 |
| H  | 2.03642800  | 3.33610500  | 0.76731700  |
| H  | 0.46826800  | 3.40768600  | -0.04553300 |
| H  | 1.08964700  | -0.99930800 | -1.00270100 |
| H  | 5.68699900  | -1.41540900 | -0.41678600 |
| H  | 5.53282900  | 0.21787000  | -1.10698900 |
| H  | 5.97132600  | 0.01697400  | 0.61468600  |
| H  | -0.37429700 | -2.49475700 | 0.41932800  |
| H  | 0.55591800  | -3.51713500 | 1.55738300  |
| H  | 1.01322100  | -3.39748600 | -0.17104900 |
| Cl | -5.57690900 | -0.73078100 | -0.80814600 |



Compound **1a**, optimization level PCM-M06-2X/6-311++G(2d,p)

## Conformation #8

|    |             |             |             |
|----|-------------|-------------|-------------|
| C  | -3.72383800 | -0.21840200 | -0.13461000 |
| C  | -3.16723900 | -0.55177100 | 1.07938200  |
| C  | -1.78610900 | -0.75336000 | 1.09155100  |
| C  | -0.98663800 | -0.62186500 | -0.06782500 |
| C  | -1.60576500 | -0.28765900 | -1.28012400 |
| C  | -2.97127500 | -0.08704500 | -1.31112000 |
| C  | 0.37399300  | -0.88464100 | 0.32049200  |
| C  | 0.33847900  | -1.16261700 | 1.65704700  |
| N  | -0.95370900 | -1.08925300 | 2.12310300  |
| C  | 1.57581300  | -0.79925700 | -0.58318900 |
| C  | 2.57279900  | -1.95910900 | -0.37372900 |
| C  | 1.92198300  | -3.27127400 | -0.81192300 |
| C  | 3.87781000  | -1.74676700 | -1.13888800 |
| C  | 2.23200300  | 0.60876300  | -0.54331200 |
| C  | 1.14397700  | 1.63551900  | -0.79826400 |
| C  | 3.03004900  | 0.94433500  | 0.71304700  |
| O  | 0.69661300  | 1.87430100  | -1.89089600 |
| O  | 3.03498900  | 0.22894700  | 1.68555000  |
| O  | 0.69555600  | 2.19377300  | 0.32350600  |
| C  | -0.45179500 | 3.04258700  | 0.17967100  |
| C  | 3.86274300  | 2.19721700  | 0.63944400  |
| Cl | -5.45346800 | 0.05520900  | -0.22129700 |
| H  | -3.77183800 | -0.64960100 | 1.97102100  |
| H  | -1.02392200 | -0.17216100 | -2.18632700 |
| H  | -3.47140900 | 0.17413500  | -2.23369800 |
| H  | 1.14730900  | -1.39319300 | 2.33029900  |
| H  | -1.23537200 | -1.25332200 | 3.07609700  |
| H  | 1.20796500  | -0.89204200 | -1.61300100 |
| H  | 2.80460700  | -2.02185500 | 0.69134600  |
| H  | 1.72715700  | -3.25641500 | -1.88823600 |
| H  | 2.58103600  | -4.11521500 | -0.60157800 |
| H  | 0.97532700  | -3.43971200 | -0.29682200 |
| H  | 4.50294100  | -2.63828000 | -1.06810600 |
| H  | 4.45964800  | -0.90906800 | -0.74904000 |
| H  | 3.67920800  | -1.56131900 | -2.19902100 |
| H  | 2.91622000  | 0.69998800  | -1.39126400 |
| H  | -0.67577200 | 3.40540600  | 1.17748600  |
| H  | -0.22526500 | 3.87039000  | -0.48943800 |
| H  | -1.28411600 | 2.46049700  | -0.21622000 |
| H  | 3.28653400  | 3.02819900  | 0.23081800  |
| H  | 4.24551800  | 2.45046900  | 1.62483900  |
| H  | 4.69992300  | 2.01522700  | -0.03998500 |

Compound **1a**, optimization level PCM-M06-2X/6-311++G(2d,p)

## Conformation #9

|    |             |             |             |
|----|-------------|-------------|-------------|
| C  | -4.34691600 | -0.25555600 | -0.30542600 |
| C  | -3.89224700 | 0.63356000  | 0.64244500  |
| C  | -2.50894300 | 0.69805700  | 0.81519700  |
| C  | -1.61456300 | -0.09871400 | 0.06595900  |
| C  | -2.12762200 | -0.98698400 | -0.88725000 |
| C  | -3.49356100 | -1.06367800 | -1.07133700 |
| C  | -0.28377800 | 0.23500200  | 0.49611300  |
| C  | -0.42612700 | 1.19225700  | 1.46131400  |
| N  | -1.75893100 | 1.47219400  | 1.65800900  |
| C  | 0.97508900  | -0.40166800 | -0.02243200 |
| C  | 1.17597000  | -1.80043700 | 0.62327200  |
| C  | 2.13945300  | -2.70235900 | -0.15029700 |
| C  | 1.58342600  | -1.72203800 | 2.09328900  |
| C  | 2.17143500  | 0.55365100  | 0.15985800  |
| C  | 3.41484100  | 0.02401400  | -0.52856300 |
| C  | 1.90145600  | 1.95160500  | -0.42183000 |
| O  | 3.48780400  | -0.21414100 | -1.70773700 |
| O  | 2.22466600  | 2.92692500  | 0.21423500  |
| O  | 4.42835100  | -0.13142200 | 0.32021500  |
| C  | 5.64328400  | -0.63179200 | -0.25583500 |
| C  | 1.25961700  | 2.04909000  | -1.77648600 |
| Cl | -6.07359700 | -0.38761800 | -0.57366200 |
| H  | -4.57468700 | 1.24563100  | 1.21653600  |
| H  | -1.46723100 | -1.61164900 | -1.47757800 |
| H  | -3.91766800 | -1.74059200 | -1.80017100 |
| H  | 0.32369200  | 1.71462400  | 2.03504700  |
| H  | -2.11755600 | 2.15320900  | 2.30750800  |
| H  | 0.85128000  | -0.56245600 | -1.09957700 |
| H  | 0.18865500  | -2.27070200 | 0.57447800  |
| H  | 3.18090700  | -2.40649800 | -0.00718100 |
| H  | 2.04941700  | -3.72779900 | 0.21268400  |
| H  | 1.92531500  | -2.69790000 | -1.22052500 |
| H  | 1.53658200  | -2.71337600 | 2.54680700  |
| H  | 0.92686800  | -1.05890000 | 2.65971300  |
| H  | 2.61073800  | -1.36290400 | 2.19589400  |
| H  | 2.39803300  | 0.69967600  | 1.21525300  |
| H  | 6.35060900  | -0.70003900 | 0.56386200  |
| H  | 5.46801100  | -1.61246400 | -0.69603800 |
| H  | 6.00275000  | 0.05361700  | -1.02070000 |
| H  | 1.76159400  | 1.38317200  | -2.47883900 |
| H  | 0.21836300  | 1.72607900  | -1.69900600 |
| H  | 1.29654000  | 3.07846500  | -2.12363600 |

Compound **1a**, optimization level PCM-M06-2X/6-311++G(2d,p)

## Conformation #16

|    |             |             |             |
|----|-------------|-------------|-------------|
| C  | -4.18214500 | 0.04723900  | -0.47932700 |
| C  | -3.77998900 | 0.40292000  | 0.78793800  |
| C  | -2.41218100 | 0.31003200  | 1.05054000  |
| C  | -1.48010200 | -0.12606300 | 0.08180300  |
| C  | -1.94183800 | -0.47304000 | -1.19404900 |
| C  | -3.29079000 | -0.38582300 | -1.47250600 |
| C  | -0.17965900 | -0.09392900 | 0.69347000  |
| C  | -0.37571300 | 0.35418100  | 1.97069900  |
| N  | -1.71265800 | 0.59485500  | 2.19074700  |
| C  | 1.11403300  | -0.48644300 | 0.03328000  |
| C  | 1.55343000  | -1.93820100 | 0.34566900  |
| C  | 1.92571100  | -2.15695200 | 1.81061300  |
| C  | 0.47809300  | -2.93193400 | -0.08707000 |
| C  | 2.20804800  | 0.53834900  | 0.37475900  |
| C  | 3.56166300  | 0.12306300  | -0.17506300 |
| C  | 1.87177100  | 1.93248800  | -0.17488300 |
| O  | 4.54399800  | -0.06206800 | 0.49730100  |
| O  | 1.16839800  | 2.07243700  | -1.14382400 |
| O  | 3.53253800  | -0.01862500 | -1.49780900 |
| C  | 4.75827100  | -0.45059700 | -2.10401400 |
| C  | 2.47836800  | 3.08742600  | 0.56839400  |
| H  | -4.48862100 | 0.73623100  | 1.53405200  |
| H  | -1.25413400 | -0.80688600 | -1.96177400 |
| H  | -3.67283600 | -0.64691600 | -2.44984500 |
| H  | 0.33635900  | 0.52850300  | 2.76250200  |
| H  | -2.10563300 | 0.94008600  | 3.05139800  |
| H  | 0.96051000  | -0.42429100 | -1.04729900 |
| H  | 2.44389200  | -2.13237100 | -0.26412700 |
| H  | 2.23546600  | -3.19209100 | 1.96467500  |
| H  | 1.06778100  | -1.96600800 | 2.45951700  |
| H  | 2.74999000  | -1.51530600 | 2.12776700  |
| H  | 0.20647400  | -2.79290700 | -1.13582000 |
| H  | -0.42482300 | -2.81034800 | 0.51619200  |
| H  | 0.83399100  | -3.95582900 | 0.03912000  |
| H  | 2.34917600  | 0.62461100  | 1.45265700  |
| H  | 4.55587500  | -0.50753300 | -3.16831800 |
| H  | 5.04016500  | -1.42693200 | -1.71330400 |
| H  | 5.54873300  | 0.26888700  | -1.89994700 |
| H  | 3.53956700  | 2.90378600  | 0.75078100  |
| H  | 1.99425600  | 3.15891400  | 1.54634800  |
| H  | 2.33817700  | 4.01396700  | 0.01799100  |
| Cl | -5.88629800 | 0.14048200  | -0.87909800 |

Compound **1a**, optimization level PCM-M06-2X/6-311++G(2d,p)

## Conformation #19

|    |             |             |             |
|----|-------------|-------------|-------------|
| C  | -3.83820400 | -0.57980400 | -0.41187300 |
| C  | -3.68079800 | 0.29818400  | 0.63440300  |
| C  | -2.38731600 | 0.77275700  | 0.85778900  |
| C  | -1.27712700 | 0.39390700  | 0.06319000  |
| C  | -1.50170900 | -0.50265900 | -0.99471800 |
| C  | -2.77239600 | -0.98722900 | -1.22673000 |
| C  | -0.12261600 | 1.06922400  | 0.60939400  |
| C  | -0.58229100 | 1.79556400  | 1.67166800  |
| N  | -1.93560700 | 1.63156900  | 1.82068100  |
| C  | 1.32516200  | 1.02280500  | 0.19216500  |
| C  | 1.65274000  | 1.87029500  | -1.06082100 |
| C  | 0.96614700  | 1.39511800  | -2.33953100 |
| C  | 1.32583500  | 3.33998600  | -0.80454600 |
| C  | 1.81154200  | -0.43293900 | 0.07377000  |
| C  | 3.30898300  | -0.52280900 | -0.14568100 |
| C  | 1.53512800  | -1.18958400 | 1.38875300  |
| O  | 4.11644100  | 0.27665700  | 0.24911600  |
| O  | 1.97960300  | -0.77149500 | 2.42932500  |
| O  | 3.63262300  | -1.64608900 | -0.78890500 |
| C  | 5.03669400  | -1.86775800 | -0.97937900 |
| C  | 0.71421000  | -2.43929000 | 1.28953200  |
| H  | -4.51630300 | 0.60022800  | 1.25166500  |
| H  | -0.69588700 | -0.82123200 | -1.64276800 |
| H  | -2.95793600 | -1.67899300 | -2.03688600 |
| H  | -0.02852300 | 2.42710000  | 2.34901600  |
| H  | -2.49795300 | 2.05298700  | 2.54223400  |
| H  | 1.90055300  | 1.45581300  | 1.01539200  |
| H  | 2.73373700  | 1.79365400  | -1.20722600 |
| H  | 1.29625100  | 2.00492900  | -3.18259600 |
| H  | -0.11838900 | 1.49638600  | -2.26131200 |
| H  | 1.20090700  | 0.35561200  | -2.57924900 |
| H  | 1.67081900  | 3.95621600  | -1.63668200 |
| H  | 1.80521600  | 3.69998900  | 0.10866300  |
| H  | 0.24798900  | 3.48406800  | -0.70019000 |
| H  | 1.32011200  | -0.96531500 | -0.73911600 |
| H  | 5.46301600  | -1.06192000 | -1.57371600 |
| H  | 5.53941100  | -1.91827400 | -0.01538700 |
| H  | 5.11664500  | -2.81408600 | -1.50398000 |
| H  | -0.26895600 | -2.18620200 | 0.88369000  |
| H  | 0.61293400  | -2.90905600 | 2.26443200  |
| H  | 1.18676800  | -3.12398200 | 0.58094300  |
| Cl | -5.43378900 | -1.22094700 | -0.74601700 |

Compound **1a**, optimization level PCM-M06-2X/6-311++G(2d,p)

## Conformation #33

|    |             |             |             |
|----|-------------|-------------|-------------|
| C  | 4.01416800  | -0.06670700 | 0.46311300  |
| C  | 3.60317800  | 0.21311900  | -0.82094100 |
| C  | 2.25190800  | 0.00020100  | -1.09697000 |
| C  | 1.34692200  | -0.48198300 | -0.12456100 |
| C  | 1.81545000  | -0.75073700 | 1.16757200  |
| C  | 3.14863900  | -0.54216800 | 1.45930700  |
| C  | 0.05895300  | -0.58726600 | -0.75373600 |
| C  | 0.23219100  | -0.16849200 | -2.04235700 |
| N  | 1.54630600  | 0.18336100  | -2.25444600 |
| C  | -1.21874300 | -0.97466300 | -0.05967200 |
| C  | -2.26136900 | -1.56514200 | -1.02996700 |
| C  | -1.73972200 | -2.88311100 | -1.60895800 |
| C  | -3.62329400 | -1.81137700 | -0.38283700 |
| C  | -1.68836500 | 0.25218800  | 0.77787500  |
| C  | -2.12736800 | 1.38475500  | -0.12232800 |
| C  | -2.67964400 | -0.09256600 | 1.89221000  |
| O  | -3.13042500 | 1.38413100  | -0.79230000 |
| O  | -2.52394200 | -1.11013800 | 2.52426500  |
| O  | -1.25227900 | 2.39013200  | -0.11866000 |
| C  | -1.55203100 | 3.47294300  | -1.00813900 |
| C  | -3.75210900 | 0.90413200  | 2.22979600  |
| Cl | 5.69889700  | 0.18102200  | 0.87878400  |
| H  | 4.29426800  | 0.57795400  | -1.56883800 |
| H  | 1.14652900  | -1.12166700 | 1.93587900  |
| H  | 3.53772200  | -0.74201300 | 2.44822600  |
| H  | -0.48027900 | -0.09483000 | -2.84895900 |
| H  | 1.92657600  | 0.50175700  | -3.13089000 |
| H  | -0.98940000 | -1.74493800 | 0.68485300  |
| H  | -2.40875200 | -0.85561400 | -1.84959300 |
| H  | -1.61997400 | -3.62097800 | -0.81051500 |
| H  | -2.45101400 | -3.28597800 | -2.33185700 |
| H  | -0.77812500 | -2.76293800 | -2.10689500 |
| H  | -4.29250700 | -2.27893300 | -1.10746200 |
| H  | -4.09583600 | -0.88473400 | -0.05572700 |
| H  | -3.53100900 | -2.48072900 | 0.47528000  |
| H  | -0.81024400 | 0.60791400  | 1.32728600  |
| H  | -0.74721700 | 4.18956200  | -0.88170900 |
| H  | -1.58614800 | 3.11008500  | -2.03416200 |
| H  | -2.50931600 | 3.91919500  | -0.74543100 |
| H  | -4.27142200 | 0.59717500  | 3.13366100  |
| H  | -3.30493500 | 1.89209400  | 2.36800300  |
| H  | -4.45373000 | 0.98495100  | 1.39776600  |

Compound **1a**, optimization level PCM-M06-2X/6-311++G(2d,p)

## Conformation #35

|    |             |             |             |
|----|-------------|-------------|-------------|
| C  | -4.25480700 | 0.03983400  | -0.35006100 |
| C  | -3.78303500 | 0.31106500  | 0.91412000  |
| C  | -2.40181600 | 0.21525800  | 1.09136200  |
| C  | -1.52381700 | -0.14141700 | 0.04282200  |
| C  | -2.05562800 | -0.40345800 | -1.22610100 |
| C  | -3.41899100 | -0.31265500 | -1.42038400 |
| C  | -0.19082900 | -0.13692900 | 0.58040100  |
| C  | -0.31629800 | 0.21792400  | 1.89513000  |
| N  | -1.64001800 | 0.42773300  | 2.20719800  |
| C  | 1.06742300  | -0.46284800 | -0.17657400 |
| C  | 1.54185000  | -1.92465300 | 0.01252700  |
| C  | 1.95357500  | -2.25133400 | 1.44653000  |
| C  | 0.47162500  | -2.90141100 | -0.46962000 |
| C  | 2.16761000  | 0.55820500  | 0.16247000  |
| C  | 3.43763500  | 0.22470600  | -0.60099000 |
| C  | 1.75630800  | 1.98144400  | -0.23491000 |
| O  | 3.52278300  | 0.24238400  | -1.80232400 |
| O  | 1.00247700  | 2.18024700  | -1.15437400 |
| O  | 4.44019800  | -0.10990000 | 0.20752100  |
| C  | 5.66128200  | -0.48601900 | -0.44586200 |
| C  | 2.35988600  | 3.08884600  | 0.57991800  |
| H  | -4.45020000 | 0.58452600  | 1.72038200  |
| H  | -1.41079800 | -0.67466600 | -2.05333800 |
| H  | -3.85468400 | -0.50907500 | -2.39039700 |
| H  | 0.43931600  | 0.34329300  | 2.65531600  |
| H  | -1.98618500 | 0.70122900  | 3.11250600  |
| H  | 0.85429600  | -0.33097400 | -1.24113300 |
| H  | 2.41942000  | -2.05538800 | -0.63186400 |
| H  | 2.30453400  | -3.28314700 | 1.50547700  |
| H  | 1.10319300  | -2.14967000 | 2.12458700  |
| H  | 2.75981100  | -1.60795600 | 1.80340000  |
| H  | 0.17955800  | -2.69359100 | -1.50131900 |
| H  | -0.42144900 | -2.83469600 | 0.15650200  |
| H  | 0.84256800  | -3.92661900 | -0.42114800 |
| H  | 2.40481700  | 0.54930100  | 1.22664600  |
| H  | 6.35831600  | -0.72561800 | 0.35016700  |
| H  | 6.03186200  | 0.34171600  | -1.04725100 |
| H  | 5.48843900  | -1.35328400 | -1.08068300 |
| H  | 3.43795600  | 2.94127300  | 0.67769900  |
| H  | 1.93912800  | 3.04466400  | 1.58827300  |
| H  | 2.14542800  | 4.05520100  | 0.13122200  |
| Cl | -5.98004100 | 0.14048000  | -0.64392300 |

Compound **1a**, optimization level PCM-M06-2X/6-311++G(2d,p)

## Conformation #46

|    |             |             |             |
|----|-------------|-------------|-------------|
| C  | -3.86201600 | -0.60063500 | -0.36970700 |
| C  | -3.70836900 | 0.46515600  | 0.48476500  |
| C  | -2.40495300 | 0.92873900  | 0.67011300  |
| C  | -1.28186500 | 0.35514900  | 0.02567400  |
| C  | -1.50215500 | -0.72934100 | -0.83893500 |
| C  | -2.78306500 | -1.20314200 | -1.03229800 |
| C  | -0.12351200 | 1.09414400  | 0.47121200  |
| C  | -0.59354500 | 2.04337700  | 1.33564100  |
| N  | -1.95625300 | 1.95549600  | 1.45419100  |
| C  | 1.33224200  | 0.92784600  | 0.12480500  |
| C  | 1.73792900  | 1.55587000  | -1.23210900 |
| C  | 1.06252100  | 0.91212600  | -2.44105000 |
| C  | 1.47986400  | 3.06066500  | -1.22143400 |
| C  | 1.76887100  | -0.55247900 | 0.22018500  |
| C  | 3.26891800  | -0.65340400 | 0.01748800  |
| C  | 1.39421000  | -1.18009200 | 1.56792900  |
| O  | 4.08750600  | -0.04472200 | 0.65987600  |
| O  | 0.78123800  | -2.22129600 | 1.58561200  |
| O  | 3.57991300  | -1.49260000 | -0.96672000 |
| C  | 4.98200400  | -1.63816200 | -1.23528800 |
| C  | 1.79437700  | -0.46264800 | 2.82596700  |
| H  | -4.55376000 | 0.91737700  | 0.98555600  |
| H  | -0.68604800 | -1.20119800 | -1.36918900 |
| H  | -2.96663000 | -2.03760400 | -1.69510800 |
| H  | -0.04215000 | 2.78990000  | 1.88675600  |
| H  | -2.52927500 | 2.53961800  | 2.04167500  |
| H  | 1.90400000  | 1.46717600  | 0.88718300  |
| H  | 2.82017000  | 1.41006100  | -1.32937000 |
| H  | 1.42048700  | 1.38419100  | -3.35770600 |
| H  | -0.02029300 | 1.04803100  | -2.39716500 |
| H  | 1.27551200  | -0.15583300 | -2.51935500 |
| H  | 1.88330200  | 3.52042300  | -2.12511000 |
| H  | 1.94681300  | 3.53835600  | -0.35716400 |
| H  | 0.40801300  | 3.26755100  | -1.18517800 |
| H  | 1.28521200  | -1.16155300 | -0.53894100 |
| H  | 5.40591700  | -0.67718800 | -1.52071200 |
| H  | 5.49231800  | -2.01726000 | -0.35214000 |
| H  | 5.05169200  | -2.34700000 | -2.05355500 |
| H  | 2.81835300  | -0.09715800 | 2.75207400  |
| H  | 1.67641800  | -1.12776300 | 3.67769100  |
| H  | 1.14094900  | 0.40418800  | 2.95236200  |
| Cl | -5.47030600 | -1.23663800 | -0.64881300 |

Compound **1a**, optimization level PCM-M06-2X/6-311++G(2d,p)

## Conformation #59

|    |             |             |             |
|----|-------------|-------------|-------------|
| C  | 4.20559600  | 0.00577800  | -0.46540000 |
| C  | 3.79935600  | -0.51429600 | 0.74266200  |
| C  | 2.43651700  | -0.42112700 | 1.02836100  |
| C  | 1.51349900  | 0.17215300  | 0.13730500  |
| C  | 1.97853700  | 0.68692800  | -1.07952900 |
| C  | 3.32329900  | 0.60205100  | -1.37881600 |
| C  | 0.21651900  | 0.08855800  | 0.74967300  |
| C  | 0.40435500  | -0.53384600 | 1.95203100  |
| N  | 1.73420700  | -0.83964500 | 2.12533900  |
| C  | -1.07878500 | 0.60669800  | 0.18204500  |
| C  | -1.45418400 | 1.95988900  | 0.83850100  |
| C  | -0.35472300 | 2.99218600  | 0.58791400  |
| C  | -2.79581100 | 2.52343700  | 0.36983500  |
| C  | -2.20218000 | -0.44260800 | 0.33938200  |
| C  | -3.36479500 | -0.18668300 | -0.60439900 |
| C  | -1.72819900 | -1.87486400 | 0.04011700  |
| O  | -3.25014200 | 0.16352600  | -1.75107600 |
| O  | -1.96630800 | -2.75987900 | 0.82680900  |
| O  | -4.53500600 | -0.44943200 | -0.02610300 |
| C  | -5.68952700 | -0.25508700 | -0.85470100 |
| C  | -1.00195300 | -2.11894800 | -1.25351200 |
| Cl | 5.90396700  | -0.07917700 | -0.88899700 |
| H  | 4.50189000  | -0.96929400 | 1.42778100  |
| H  | 1.29741500  | 1.14997700  | -1.78387200 |
| H  | 3.70886000  | 0.99095300  | -2.31125400 |
| H  | -0.31389800 | -0.79725800 | 2.71323800  |
| H  | 2.12048100  | -1.31621000 | 2.92425500  |
| H  | -0.94074100 | 0.77718000  | -0.89178700 |
| H  | -1.51708900 | 1.77629600  | 1.91753000  |
| H  | -0.24692300 | 3.17566700  | -0.48546400 |
| H  | -0.60955000 | 3.93958000  | 1.06534500  |
| H  | 0.61001100  | 2.66386600  | 0.97485900  |
| H  | -2.95563700 | 3.50495200  | 0.81910400  |
| H  | -3.64129900 | 1.89817400  | 0.66282600  |
| H  | -2.81114800 | 2.64184000  | -0.71619800 |
| H  | -2.58400700 | -0.45280600 | 1.36124000  |
| H  | -6.54232500 | -0.51248900 | -0.23546400 |
| H  | -5.74430500 | 0.78516600  | -1.17199700 |
| H  | -5.63682600 | -0.90297300 | -1.72737800 |
| H  | -0.95223100 | -3.18759600 | -1.44690100 |
| H  | -1.49430400 | -1.59820700 | -2.07520900 |
| H  | 0.01125300  | -1.71833000 | -1.17095400 |



Compound **1a**, optimization level PCM-M06-2X/6-311++G(2d,p)

## Conformation #99

|    |             |             |             |
|----|-------------|-------------|-------------|
| C  | -3.94716200 | -0.34346300 | -0.39927400 |
| C  | -3.68580100 | 0.29889500  | 0.78758600  |
| C  | -2.35004000 | 0.61487200  | 1.04100200  |
| C  | -1.29806900 | 0.30602100  | 0.14387500  |
| C  | -1.62846300 | -0.34715400 | -1.05527300 |
| C  | -2.94280400 | -0.67030100 | -1.32130100 |
| C  | -0.07760200 | 0.78057100  | 0.75503500  |
| C  | -0.44630400 | 1.33132900  | 1.95077300  |
| N  | -1.80250400 | 1.24213600  | 2.12581900  |
| C  | 1.34714100  | 0.72081900  | 0.27026000  |
| C  | 1.71045400  | 1.80788200  | -0.77181400 |
| C  | 0.96423900  | 1.67028900  | -2.09703700 |
| C  | 1.49985600  | 3.20196500  | -0.18635300 |
| C  | 1.69912500  | -0.69716300 | -0.23391000 |
| C  | 3.13310200  | -0.77088900 | -0.72557800 |
| C  | 1.44240000  | -1.78230800 | 0.82072700  |
| O  | 3.44590500  | -1.13675900 | -1.82958900 |
| O  | 0.85204000  | -2.78562900 | 0.49606300  |
| O  | 4.01035000  | -0.37532100 | 0.19526800  |
| C  | 5.38667300  | -0.39052200 | -0.20922100 |
| C  | 1.91702200  | -1.55879800 | 2.22946100  |
| H  | -4.47487500 | 0.54498400  | 1.48554400  |
| H  | -0.87395000 | -0.59542300 | -1.78939800 |
| H  | -3.20980000 | -1.17279900 | -2.24084700 |
| H  | 0.17518900  | 1.78787500  | 2.70601200  |
| H  | -2.30840800 | 1.56776000  | 2.93369300  |
| H  | 1.98352100  | 0.91705900  | 1.13889100  |
| H  | 2.78256400  | 1.69670000  | -0.97315100 |
| H  | 1.29786000  | 2.44459000  | -2.79013400 |
| H  | -0.11078900 | 1.79558500  | -1.95036700 |
| H  | 1.14034900  | 0.70484500  | -2.57584800 |
| H  | 1.88163300  | 3.96138300  | -0.87067900 |
| H  | 2.01485800  | 3.31414800  | 0.77050300  |
| H  | 0.43731800  | 3.39530200  | -0.02351100 |
| H  | 1.08945500  | -0.97369400 | -1.08996000 |
| H  | 5.68077500  | -1.39923100 | -0.49190700 |
| H  | 5.53134400  | 0.28431800  | -1.05107000 |
| H  | 5.95027400  | -0.05303100 | 0.65421400  |
| H  | 2.92980500  | -1.15809800 | 2.24286800  |
| H  | 1.86244300  | -2.49359100 | 2.78155300  |
| H  | 1.26213100  | -0.82246800 | 2.70191700  |
| Cl | -5.60194900 | -0.77010300 | -0.78451400 |

Compound **1a**, optimization level PCM-M11/6-311++G(2d,p)

## Conformation #1

|    |             |             |             |
|----|-------------|-------------|-------------|
| C  | 4.21528000  | -0.00962900 | -0.36466000 |
| C  | 3.75842100  | -0.26961200 | 0.90439900  |
| C  | 2.37862000  | -0.18230400 | 1.09364600  |
| C  | 1.49369200  | 0.15750500  | 0.04986400  |
| C  | 2.00960000  | 0.40858100  | -1.22669800 |
| C  | 3.36913900  | 0.32449500  | -1.43176400 |
| C  | 0.16300000  | 0.14335600  | 0.59784200  |
| C  | 0.29973700  | -0.20343900 | 1.91229400  |
| N  | 1.62578800  | -0.39335800 | 2.21691400  |
| C  | -1.10828200 | 0.43683300  | -0.15060800 |
| C  | -1.58368300 | 1.90684300  | -0.01928100 |
| C  | -2.00172400 | 2.27527100  | 1.40417900  |
| C  | -0.50059600 | 2.86152600  | -0.52150300 |
| C  | -2.21517300 | -0.55430300 | 0.27153800  |
| C  | -3.45083000 | -0.29855900 | -0.57041800 |
| C  | -1.77138600 | -2.01197400 | 0.09835700  |
| O  | -3.47787800 | -0.37958600 | -1.77575700 |
| O  | -1.98439900 | -2.80782700 | 0.98510700  |
| O  | -4.50085300 | 0.05680500  | 0.16425400  |
| C  | -5.70316600 | 0.35422300  | -0.57272500 |
| C  | -1.07005800 | -2.38878600 | -1.17536200 |
| H  | 4.43897300  | -0.53146300 | 1.70873500  |
| H  | 1.35140500  | 0.66794300  | -2.05347100 |
| H  | 3.79813400  | 0.51362300  | -2.41094300 |
| H  | -0.45892900 | -0.34014800 | 2.67405800  |
| H  | 1.98065200  | -0.66161200 | 3.12242400  |
| H  | -0.91898400 | 0.26512400  | -1.22018000 |
| H  | -2.45909800 | 2.01534500  | -0.67724500 |
| H  | -2.29036600 | 3.33112900  | 1.44694200  |
| H  | -1.16617500 | 2.12918300  | 2.09988800  |
| H  | -2.85567100 | 1.68516600  | 1.75471200  |
| H  | -0.18925100 | 2.61250200  | -1.54295400 |
| H  | 0.38350200  | 2.81329200  | 0.12620400  |
| H  | -0.86815300 | 3.89330200  | -0.51853700 |
| H  | -2.48002300 | -0.43061800 | 1.32404000  |
| H  | -6.44826200 | 0.62992200  | 0.17213600  |
| H  | -6.01935700 | -0.52889100 | -1.13276700 |
| H  | -5.51523500 | 1.18161400  | -1.26140800 |
| H  | -0.05339600 | -1.97585600 | -1.14661300 |
| H  | -1.58476500 | -1.94863500 | -2.03475000 |
| H  | -1.01708800 | -3.47481200 | -1.26121700 |
| Cl | 5.94123900  | -0.10281700 | -0.67475800 |

Compound **1a**, optimization level PCM-M11/6-311++G(2d,p)

## Conformation #4

|    |             |             |             |
|----|-------------|-------------|-------------|
| C  | -3.80687400 | -0.13512300 | -0.02948900 |
| C  | -3.22631300 | -0.51903200 | 1.15428600  |
| C  | -1.84165100 | -0.69632400 | 1.13427100  |
| C  | -1.06871000 | -0.48831800 | -0.02750100 |
| C  | -1.71211700 | -0.10360300 | -1.21046400 |
| C  | -3.07808000 | 0.07222500  | -1.20987500 |
| C  | 0.30303500  | -0.75852400 | 0.31808400  |
| C  | 0.29752500  | -1.11198500 | 1.63722700  |
| N  | -0.98527000 | -1.07818100 | 2.13017400  |
| C  | 1.47746000  | -0.66836900 | -0.62323900 |
| C  | 2.30639000  | -1.97053700 | -0.66960200 |
| C  | 1.44461200  | -3.09224100 | -1.25322100 |
| C  | 3.58053500  | -1.80203000 | -1.49846200 |
| C  | 2.33250600  | 0.60491500  | -0.38437700 |
| C  | 1.40321200  | 1.78503200  | -0.17300600 |
| C  | 3.30476900  | 0.55494100  | 0.79106700  |
| O  | 1.33012000  | 2.43391400  | 0.84338400  |
| O  | 3.20597500  | -0.27182900 | 1.66775600  |
| O  | 0.63559300  | 1.99883500  | -1.23803500 |
| C  | -0.38704500 | 2.99960000  | -1.07672600 |
| C  | 4.40503000  | 1.57999800  | 0.76833800  |
| Cl | -5.54641400 | 0.10877300  | -0.07633100 |
| H  | -3.81847500 | -0.67457900 | 2.05098700  |
| H  | -1.14251900 | 0.06816500  | -2.12148700 |
| H  | -3.60213500 | 0.37290800  | -2.11204600 |
| H  | 1.12876300  | -1.38353500 | 2.27384000  |
| H  | -1.24550500 | -1.28735000 | 3.08213900  |
| H  | 1.06074100  | -0.53115700 | -1.63186200 |
| H  | 2.58299100  | -2.23425800 | 0.35747900  |
| H  | 0.51635300  | -3.21832800 | -0.68554800 |
| H  | 1.18011100  | -2.86446100 | -2.29478200 |
| H  | 1.98669200  | -4.04416700 | -1.24368500 |
| H  | 4.08225400  | -2.76712300 | -1.62671700 |
| H  | 4.30006400  | -1.11979300 | -1.03001200 |
| H  | 3.34141800  | -1.41282900 | -2.49789800 |
| H  | 2.91607700  | 0.81738100  | -1.29018000 |
| H  | 0.07173100  | 3.97185800  | -0.88191900 |
| H  | -0.94289300 | 3.01144800  | -2.01393600 |
| H  | -1.03967400 | 2.71859000  | -0.24518200 |
| H  | 3.99095100  | 2.57335700  | 0.56904000  |
| H  | 4.94953700  | 1.57369000  | 1.71338900  |
| H  | 5.09022900  | 1.33719900  | -0.05389500 |

Compound **1a**, optimization level PCM-M11/6-311++G(2d,p)

## Conformation #6

|    |             |             |             |
|----|-------------|-------------|-------------|
| C  | 4.14331300  | -0.07959600 | -0.47101700 |
| C  | 3.74928400  | -0.26754900 | 0.83128300  |
| C  | 2.38244800  | -0.14723100 | 1.08606200  |
| C  | 1.44956300  | 0.15542900  | 0.07306500  |
| C  | 1.90217500  | 0.33262800  | -1.23938700 |
| C  | 3.24783200  | 0.21464700  | -1.50924200 |
| C  | 0.14877000  | 0.19125600  | 0.68802000  |
| C  | 0.34862900  | -0.09197800 | 2.00976000  |
| N  | 1.68591000  | -0.28925400 | 2.25536300  |
| C  | -1.15462600 | 0.47124100  | -0.01007500 |
| C  | -1.59680200 | 1.95536700  | 0.07015800  |
| C  | -1.96631000 | 2.38937900  | 1.48864400  |
| C  | -0.51318300 | 2.86714500  | -0.50462900 |
| C  | -2.24878300 | -0.47361200 | 0.52864900  |
| C  | -3.58377700 | -0.18376700 | -0.13264100 |
| C  | -1.88869300 | -1.95645400 | 0.35129600  |
| O  | -4.58071900 | 0.14877300  | 0.45966300  |
| O  | -2.17275200 | -2.73919300 | 1.22979400  |
| O  | -3.52837400 | -0.31849600 | -1.45764300 |
| C  | -4.74919500 | -0.03241400 | -2.16706400 |
| C  | -1.18613200 | -2.38240300 | -0.90722800 |
| H  | 4.46655500  | -0.49943700 | 1.61262500  |
| H  | 1.20606200  | 0.56107700  | -2.04399400 |
| H  | 3.62794700  | 0.34701200  | -2.51753800 |
| H  | -0.36989400 | -0.17550100 | 2.81665600  |
| H  | 2.08255900  | -0.52111600 | 3.15353800  |
| H  | -1.01928000 | 0.24421000  | -1.07688700 |
| H  | -2.48994900 | 2.05275400  | -0.56552800 |
| H  | -2.22598600 | 3.45351800  | 1.49849500  |
| H  | -1.11645400 | 2.24680400  | 2.16777500  |
| H  | -2.82581000 | 1.83530900  | 1.88216300  |
| H  | -0.23316000 | 2.56577100  | -1.52103900 |
| H  | 0.38744400  | 2.83446300  | 0.12082500  |
| H  | -0.86474400 | 3.90386800  | -0.54053600 |
| H  | -2.40583100 | -0.32319900 | 1.59928000  |
| H  | -4.52797900 | -0.19741600 | -3.22066400 |
| H  | -5.04171000 | 1.00523800  | -1.98807500 |
| H  | -5.53989100 | -0.70399000 | -1.82457100 |
| H  | -0.15814300 | -1.99930900 | -0.88223800 |
| H  | -1.67940500 | -1.95305300 | -1.78426400 |
| H  | -1.16764600 | -3.47130600 | -0.96579000 |
| Cl | 5.84950800  | -0.21659500 | -0.86330600 |

Compound **1a**, optimization level PCM-M11/6-311++G(2d,p)

## Conformation #7

|    |             |             |             |
|----|-------------|-------------|-------------|
| C  | -3.91695300 | -0.29752400 | -0.41894000 |
| C  | -3.66308100 | 0.32227900  | 0.77828700  |
| C  | -2.32961200 | 0.63650100  | 1.04456900  |
| C  | -1.27677500 | 0.34791100  | 0.14576000  |
| C  | -1.60000600 | -0.28251200 | -1.06685900 |
| C  | -2.90983600 | -0.60456300 | -1.34348800 |
| C  | -0.05642500 | 0.80395600  | 0.77477100  |
| C  | -0.42805400 | 1.32373400  | 1.98093200  |
| N  | -1.78562900 | 1.23612600  | 2.14643200  |
| C  | 1.37341400  | 0.73153600  | 0.30292100  |
| C  | 1.75881000  | 1.80246400  | -0.74489000 |
| C  | 1.04456500  | 1.63532600  | -2.08590100 |
| C  | 1.51251600  | 3.20230600  | -0.18255900 |
| C  | 1.70745700  | -0.70260800 | -0.16769800 |
| C  | 3.13223400  | -0.79135200 | -0.67914800 |
| C  | 1.49227300  | -1.68279200 | 0.99761200  |
| O  | 3.42949500  | -1.18503600 | -1.78249500 |
| O  | 2.00779600  | -1.48666400 | 2.07201900  |
| O  | 4.02347100  | -0.36626800 | 0.21075700  |
| C  | 5.39638800  | -0.39250000 | -0.22109300 |
| C  | 0.59349100  | -2.85083000 | 0.71806500  |
| H  | -4.46033500 | 0.55116500  | 1.47904000  |
| H  | -0.83795500 | -0.51499400 | -1.80543300 |
| H  | -3.17447300 | -1.09206200 | -2.27668500 |
| H  | 0.19759000  | 1.75619000  | 2.75265600  |
| H  | -2.29521300 | 1.54453200  | 2.96072200  |
| H  | 2.00531200  | 0.90827100  | 1.18285000  |
| H  | 2.84035400  | 1.69670500  | -0.91592000 |
| H  | 1.39381700  | 2.39578300  | -2.79308900 |
| H  | -0.03725800 | 1.76585500  | -1.96445400 |
| H  | 1.23259000  | 0.65395200  | -2.53847500 |
| H  | 1.90930800  | 3.96492700  | -0.86151300 |
| H  | 1.99083500  | 3.32925800  | 0.79630100  |
| H  | 0.43747400  | 3.38077000  | -0.05969300 |
| H  | 1.07421100  | -1.00847500 | -1.00258000 |
| H  | 5.68418300  | -1.41500100 | -0.47702000 |
| H  | 5.51979100  | 0.25439600  | -1.09359200 |
| H  | 5.98122100  | -0.02379100 | 0.62057500  |
| H  | -0.39911500 | -2.46685600 | 0.44899800  |
| H  | 0.52503600  | -3.50385400 | 1.58884400  |
| H  | 0.96969900  | -3.40324800 | -0.15084800 |
| Cl | -5.57213000 | -0.72533200 | -0.81835300 |

Compound **1a**, optimization level PCM-M11/6-311++G(2d,p)

## Conformation #8

|    |             |             |             |
|----|-------------|-------------|-------------|
| C  | -3.70486400 | -0.24023300 | -0.13304100 |
| C  | -3.14573300 | -0.54505000 | 1.08397400  |
| C  | -1.76495500 | -0.74966100 | 1.09557100  |
| C  | -0.97426000 | -0.64387300 | -0.06853700 |
| C  | -1.59690800 | -0.34384500 | -1.28665200 |
| C  | -2.95948100 | -0.14224200 | -1.31672600 |
| C  | 0.39042200  | -0.89240000 | 0.31959100  |
| C  | 0.36251000  | -1.14255700 | 1.66005200  |
| N  | -0.92727900 | -1.06315200 | 2.13036500  |
| C  | 1.59133200  | -0.80064500 | -0.58601500 |
| C  | 2.61431000  | -1.93269600 | -0.34684200 |
| C  | 1.99404000  | -3.26662200 | -0.76888900 |
| C  | 3.91862400  | -1.69702600 | -1.10981900 |
| C  | 2.21691800  | 0.62212600  | -0.56457900 |
| C  | 1.09656600  | 1.61741000  | -0.80858400 |
| C  | 3.00840700  | 0.98682600  | 0.68871100  |
| O  | 0.61421400  | 1.82788700  | -1.89472700 |
| O  | 3.03248100  | 0.27504700  | 1.66553400  |
| O  | 0.65405200  | 2.17944700  | 0.31443800  |
| C  | -0.52766800 | 2.99280500  | 0.18333500  |
| C  | 3.80392300  | 2.26323600  | 0.60532200  |
| Cl | -5.43753400 | 0.03851800  | -0.21940800 |
| H  | -3.75095700 | -0.61982700 | 1.98230200  |
| H  | -1.01464400 | -0.25365700 | -2.20058200 |
| H  | -3.46719800 | 0.09543600  | -2.24656500 |
| H  | 1.18235800  | -1.35369500 | 2.33354700  |
| H  | -1.20404900 | -1.20608600 | 3.08987600  |
| H  | 1.22698300  | -0.92018000 | -1.61885300 |
| H  | 2.83822000  | -1.96895200 | 0.72496000  |
| H  | 1.80206800  | -3.27021200 | -1.85028100 |
| H  | 2.67155300  | -4.09774600 | -0.54452600 |
| H  | 1.04497400  | -3.44632100 | -0.25275600 |
| H  | 4.56731700  | -2.57612500 | -1.03214400 |
| H  | 4.48134700  | -0.83927400 | -0.72288900 |
| H  | 3.71691400  | -1.52276100 | -2.17587000 |
| H  | 2.89579500  | 0.72552100  | -1.41973000 |
| H  | -0.73564200 | 3.37961900  | 1.18017700  |
| H  | -0.34247300 | 3.80785900  | -0.52024300 |
| H  | -1.35274200 | 2.36888600  | -0.17439600 |
| H  | 3.19029700  | 3.07854400  | 0.20947500  |
| H  | 4.19931300  | 2.52637100  | 1.58720000  |
| H  | 4.63452200  | 2.10749000  | -0.09450300 |

Compound **1a**, optimization level PCM-M11/6-311++G(2d,p)

## Conformation #9

|    |             |             |             |
|----|-------------|-------------|-------------|
| C  | -4.34344300 | -0.27326900 | -0.28865400 |
| C  | -3.89090300 | 0.64338800  | 0.62934800  |
| C  | -2.50725700 | 0.72252400  | 0.79220500  |
| C  | -1.61650600 | -0.08776600 | 0.05937500  |
| C  | -2.12715900 | -1.00613100 | -0.86432700 |
| C  | -3.49099800 | -1.09752000 | -1.03707400 |
| C  | -0.28371100 | 0.26503500  | 0.47044300  |
| C  | -0.42325300 | 1.24538200  | 1.41026100  |
| N  | -1.75580900 | 1.52364800  | 1.60857500  |
| C  | 0.97637400  | -0.38002100 | -0.03712400 |
| C  | 1.16873200  | -1.77356500 | 0.62418800  |
| C  | 2.12319200  | -2.69264900 | -0.14470500 |
| C  | 1.59215700  | -1.66656200 | 2.08976300  |
| C  | 2.17323400  | 0.57306500  | 0.15838900  |
| C  | 3.41875500  | 0.01675100  | -0.50521900 |
| C  | 1.90629300  | 1.95932000  | -0.45184800 |
| O  | 3.50427000  | -0.23419600 | -1.68348000 |
| O  | 2.19698900  | 2.95037100  | 0.17923900  |
| O  | 4.41663600  | -0.16428300 | 0.35731800  |
| C  | 5.62640600  | -0.71049100 | -0.20281200 |
| C  | 1.29232500  | 2.02151800  | -1.82108200 |
| Cl | -6.07448800 | -0.42390500 | -0.54351900 |
| H  | -4.57862200 | 1.26788400  | 1.19112900  |
| H  | -1.46082100 | -1.64400400 | -1.44210000 |
| H  | -3.91830200 | -1.79989200 | -1.74610700 |
| H  | 0.33455900  | 1.78720100  | 1.96400800  |
| H  | -2.11445600 | 2.21885500  | 2.24544600  |
| H  | 0.86663000  | -0.54591100 | -1.11947500 |
| H  | 0.17360300  | -2.23743400 | 0.59144400  |
| H  | 3.17227800  | -2.41434700 | 0.00935700  |
| H  | 2.01309000  | -3.72162300 | 0.21494400  |
| H  | 1.91865800  | -2.68019100 | -1.22115700 |
| H  | 1.52788800  | -2.64584300 | 2.57594300  |
| H  | 0.95427400  | -0.96768800 | 2.64346400  |
| H  | 2.63282100  | -1.32658200 | 2.16989500  |
| H  | 2.38410100  | 0.73126900  | 1.21923800  |
| H  | 6.32508900  | -0.80194200 | 0.62755700  |
| H  | 5.41606400  | -1.68828600 | -0.64541900 |
| H  | 6.01536900  | -0.03606400 | -0.96919000 |
| H  | 1.79459500  | 1.31725500  | -2.49080800 |
| H  | 0.24074400  | 1.71855200  | -1.74398500 |
| H  | 1.35081100  | 3.04043900  | -2.20575500 |

Compound **1a**, optimization level PCM-M11/6-311++G(2d,p)

## Conformation #16

|    |             |             |             |
|----|-------------|-------------|-------------|
| C  | -4.17370800 | 0.02478500  | -0.48143600 |
| C  | -3.77308500 | 0.43784800  | 0.76561200  |
| C  | -2.40544300 | 0.35744900  | 1.03290000  |
| C  | -1.47810300 | -0.12325300 | 0.08563900  |
| C  | -1.93783500 | -0.52766800 | -1.17263500 |
| C  | -3.28412400 | -0.45309000 | -1.45458000 |
| C  | -0.17580900 | -0.06488600 | 0.69379900  |
| C  | -0.36821700 | 0.44236600  | 1.94741200  |
| N  | -1.70422000 | 0.69501000  | 2.15790700  |
| C  | 1.11812800  | -0.48482500 | 0.04920900  |
| C  | 1.55511000  | -1.92373400 | 0.42137000  |
| C  | 1.94011300  | -2.06652800 | 1.89419500  |
| C  | 0.46122600  | -2.92616800 | 0.05414200  |
| C  | 2.21290900  | 0.54738800  | 0.36212100  |
| C  | 3.55929600  | 0.11358800  | -0.19268300 |
| C  | 1.87060700  | 1.92292900  | -0.23055700 |
| O  | 4.55773200  | -0.03752600 | 0.46894600  |
| O  | 1.18236000  | 2.02264700  | -1.21739600 |
| O  | 3.50951800  | -0.09101500 | -1.50681200 |
| C  | 4.73487300  | -0.53924300 | -2.11617200 |
| C  | 2.44751300  | 3.10462200  | 0.49384900  |
| H  | -4.48633500 | 0.80606100  | 1.49658700  |
| H  | -1.24545100 | -0.89724600 | -1.92601900 |
| H  | -3.66922800 | -0.75903300 | -2.42246900 |
| H  | 0.35189400  | 0.65234700  | 2.72972100  |
| H  | -2.09656000 | 1.07962800  | 3.00396300  |
| H  | 0.96915800  | -0.45764400 | -1.03766200 |
| H  | 2.43993200  | -2.15347400 | -0.19116200 |
| H  | 2.22146800  | -3.10299300 | 2.11053600  |
| H  | 1.09090800  | -1.80991600 | 2.53957500  |
| H  | 2.78988200  | -1.42934600 | 2.16501400  |
| H  | 0.16860000  | -2.83093300 | -0.99839100 |
| H  | -0.43091600 | -2.76254100 | 0.67132600  |
| H  | 0.80760500  | -3.95174700 | 0.22191500  |
| H  | 2.36153800  | 0.66420200  | 1.43995300  |
| H  | 4.51744200  | -0.65072900 | -3.17750900 |
| H  | 5.03426900  | -1.49461000 | -1.67754800 |
| H  | 5.51990500  | 0.20336900  | -1.95484000 |
| H  | 3.50858100  | 2.93262300  | 0.70881500  |
| H  | 1.93532200  | 3.19610300  | 1.46015700  |
| H  | 2.31250500  | 4.01855400  | -0.08552900 |
| Cl | -5.88168100 | 0.09881900  | -0.88545900 |



Compound **1a**, optimization level PCM-M11/6-311++G(2d,p)

## Conformation #19

|    |             |             |             |
|----|-------------|-------------|-------------|
| C  | -3.82364200 | -0.59006800 | -0.39586900 |
| C  | -3.67144200 | 0.30109800  | 0.63603100  |
| C  | -2.38073300 | 0.78590100  | 0.85282300  |
| C  | -1.27224500 | 0.39951500  | 0.06472000  |
| C  | -1.49221700 | -0.50911900 | -0.98276300 |
| C  | -2.75799900 | -1.00217700 | -1.20740200 |
| C  | -0.11969900 | 1.09187200  | 0.59708100  |
| C  | -0.58100700 | 1.83434700  | 1.64502300  |
| N  | -1.93279100 | 1.66446700  | 1.79951500  |
| C  | 1.32923400  | 1.03553200  | 0.18052300  |
| C  | 1.65978300  | 1.89290600  | -1.06538400 |
| C  | 0.92942300  | 1.44819000  | -2.33275200 |
| C  | 1.36167400  | 3.36529800  | -0.77978200 |
| C  | 1.79721800  | -0.42209000 | 0.03984800  |
| C  | 3.30051900  | -0.52627300 | -0.13992700 |
| C  | 1.49438300  | -1.20621000 | 1.33336700  |
| O  | 4.10336700  | 0.28361600  | 0.25000200  |
| O  | 1.85478000  | -0.76612100 | 2.39908000  |
| O  | 3.63906500  | -1.67306300 | -0.73267600 |
| C  | 5.05314800  | -1.90521300 | -0.87825900 |
| C  | 0.76764800  | -2.50705800 | 1.17599500  |
| H  | -4.51311200 | 0.60766900  | 1.24965000  |
| H  | -0.68260600 | -0.82861100 | -1.63304400 |
| H  | -2.94338200 | -1.70609400 | -2.01282800 |
| H  | -0.02463800 | 2.48236800  | 2.31177400  |
| H  | -2.49774900 | 2.09849400  | 2.51379100  |
| H  | 1.91382200  | 1.45053300  | 1.01162200  |
| H  | 2.73964100  | 1.79367100  | -1.23316000 |
| H  | 1.23884800  | 2.07115700  | -3.17939200 |
| H  | -0.15483400 | 1.56091100  | -2.21445600 |
| H  | 1.14423900  | 0.40636200  | -2.59914200 |
| H  | 1.70326200  | 3.99507600  | -1.60865800 |
| H  | 1.86015900  | 3.70292200  | 0.13701800  |
| H  | 0.28301700  | 3.52114700  | -0.65631900 |
| H  | 1.32389600  | -0.93983300 | -0.79830700 |
| H  | 5.49427300  | -1.11592600 | -1.49162100 |
| H  | 5.52743100  | -1.91663900 | 0.10605400  |
| H  | 5.14812500  | -2.87413800 | -1.36653900 |
| H  | -0.22029800 | -2.30599800 | 0.74324100  |
| H  | 0.66646200  | -3.01396300 | 2.13629300  |
| H  | 1.31210700  | -3.13514300 | 0.46053700  |
| Cl | -5.41947600 | -1.24584700 | -0.72141100 |

Compound **1a**, optimization level PCM-M11/6-311++G(2d,p)

## Conformation #33

|    |             |             |             |
|----|-------------|-------------|-------------|
| C  | 3.98775100  | -0.01225000 | 0.47559200  |
| C  | 3.58811600  | 0.02004700  | -0.83865800 |
| C  | 2.23823300  | -0.23769000 | -1.07998400 |
| C  | 1.32835600  | -0.52211200 | -0.04102100 |
| C  | 1.78584900  | -0.54437300 | 1.28133200  |
| C  | 3.11529800  | -0.28866600 | 1.53778200  |
| C  | 0.04202700  | -0.73964700 | -0.64714800 |
| C  | 0.22361500  | -0.57389600 | -1.98913900 |
| N  | 1.54048900  | -0.27590500 | -2.25622300 |
| C  | -1.24473300 | -0.97573500 | 0.09875100  |
| C  | -2.31413300 | -1.65542900 | -0.78109600 |
| C  | -1.84652800 | -3.06466600 | -1.16251100 |
| C  | -3.68156600 | -1.75172700 | -0.10307400 |
| C  | -1.66854500 | 0.37916200  | 0.74220800  |
| C  | -2.06237000 | 1.37533500  | -0.32616900 |
| C  | -2.67609500 | 0.23665900  | 1.88445200  |
| O  | -3.08078900 | 1.32898300  | -0.97544000 |
| O  | -2.55352100 | -0.68144900 | 2.66325700  |
| O  | -1.12753300 | 2.30837200  | -0.50821700 |
| C  | -1.37765600 | 3.23838400  | -1.57715400 |
| C  | -3.72127300 | 1.30269900  | 2.05569000  |
| Cl | 5.67365000  | 0.30704500  | 0.85091900  |
| H  | 4.28964000  | 0.23662200  | -1.63847100 |
| H  | 1.10641500  | -0.76456800 | 2.10303200  |
| H  | 3.50025000  | -0.29946900 | 2.55282300  |
| H  | -0.49034400 | -0.65358400 | -2.80000700 |
| H  | 1.92799100  | -0.12993700 | -3.17598700 |
| H  | -1.04493500 | -1.63875400 | 0.95291800  |
| H  | -2.43597400 | -1.05994700 | -1.69570200 |
| H  | -1.75286300 | -3.68355400 | -0.26024900 |
| H  | -2.57836700 | -3.54372700 | -1.82206700 |
| H  | -0.87838300 | -3.05679200 | -1.67112200 |
| H  | -4.37574800 | -2.29908300 | -0.75051900 |
| H  | -4.11794700 | -0.76521900 | 0.08274700  |
| H  | -3.60639300 | -2.29093300 | 0.84867800  |
| H  | -0.77672700 | 0.78665000  | 1.23766300  |
| H  | -0.52633500 | 3.91777400  | -1.58810900 |
| H  | -1.45462300 | 2.69573700  | -2.52317200 |
| H  | -2.30671400 | 3.78130600  | -1.38716100 |
| H  | -4.25473500 | 1.15412600  | 2.99499400  |
| H  | -3.24535500 | 2.29085800  | 2.04059500  |
| H  | -4.41766100 | 1.27024300  | 1.21115400  |

Compound **1a**, optimization level PCM-M11/6-311++G(2d,p)

## Conformation #35

|    |             |             |             |
|----|-------------|-------------|-------------|
| C  | 4.24481500  | -0.11510700 | -0.36803400 |
| C  | 3.77218700  | -0.37985100 | 0.89403600  |
| C  | 2.39558100  | -0.24074500 | 1.07907200  |
| C  | 1.52965700  | 0.15127300  | 0.03753000  |
| C  | 2.06156400  | 0.40432600  | -1.23178800 |
| C  | 3.41768600  | 0.27105700  | -1.43275500 |
| C  | 0.19764300  | 0.18868000  | 0.57898000  |
| C  | 0.31379800  | -0.17995100 | 1.88948800  |
| N  | 1.63054300  | -0.43560800 | 2.19618200  |
| C  | -1.05146400 | 0.56338200  | -0.17423900 |
| C  | -1.48215800 | 2.03581600  | 0.04095500  |
| C  | -1.98699900 | 2.30991400  | 1.45807000  |
| C  | -0.33358500 | 2.98239700  | -0.30866400 |
| C  | -2.17302300 | -0.42706600 | 0.16482900  |
| C  | -3.44043100 | -0.12033100 | -0.61362300 |
| C  | -1.76548500 | -1.86015300 | -0.22235000 |
| O  | -3.46130600 | 0.18553300  | -1.78020600 |
| O  | -1.12409700 | -2.06463600 | -1.22450200 |
| O  | -4.53562800 | -0.25973100 | 0.13245800  |
| C  | -5.78503100 | -0.02805500 | -0.54718200 |
| C  | -2.22218900 | -2.94721700 | 0.70456000  |
| H  | 4.43819700  | -0.68083200 | 1.69690600  |
| H  | 1.41718400  | 0.70220200  | -2.05619800 |
| H  | 3.85885300  | 0.46029700  | -2.40648900 |
| H  | -0.44910800 | -0.28382000 | 2.65244100  |
| H  | 1.97050700  | -0.72792200 | 3.09979500  |
| H  | -0.84563500 | 0.43662800  | -1.24472900 |
| H  | -2.30349800 | 2.22653600  | -0.66260100 |
| H  | -2.24335900 | 3.36942800  | 1.56716400  |
| H  | -1.21023600 | 2.07782700  | 2.19746600  |
| H  | -2.88371000 | 1.72782400  | 1.70223200  |
| H  | 0.05519900  | 2.78461800  | -1.31484100 |
| H  | 0.49251600  | 2.86378400  | 0.40352300  |
| H  | -0.66921900 | 4.02447000  | -0.26999800 |
| H  | -2.42213400 | -0.41586600 | 1.23021900  |
| H  | -6.56374800 | -0.18902500 | 0.19700700  |
| H  | -5.88762900 | -0.73074300 | -1.37754600 |
| H  | -5.81283800 | 0.99690100  | -0.92457300 |
| H  | -3.29100300 | -2.82592100 | 0.91635700  |
| H  | -1.69024700 | -2.83112100 | 1.65743100  |
| H  | -2.01896800 | -3.93106400 | 0.28032500  |
| Cl | 5.96811200  | -0.26732200 | -0.67249800 |

Compound **1a**, optimization level PCM-M11/6-311++G(2d,p)

## Conformation #46

|    |             |             |             |
|----|-------------|-------------|-------------|
| C  | -3.85532600 | -0.59956700 | -0.36002400 |
| C  | -3.70331800 | 0.50514800  | 0.43875000  |
| C  | -2.39860700 | 0.96869100  | 0.61431300  |
| C  | -1.27703400 | 0.35406700  | 0.01273600  |
| C  | -1.49575700 | -0.77102600 | -0.79740700 |
| C  | -2.77578500 | -1.24358900 | -0.97973100 |
| C  | -0.11582400 | 1.10638700  | 0.43228200  |
| C  | -0.58519200 | 2.10173200  | 1.24084000  |
| N  | -1.94903100 | 2.03079600  | 1.34968000  |
| C  | 1.34297900  | 0.90834400  | 0.11207600  |
| C  | 1.77101300  | 1.47029000  | -1.26728500 |
| C  | 1.12023700  | 0.75060100  | -2.44839300 |
| C  | 1.48525700  | 2.97022300  | -1.33778700 |
| C  | 1.75595100  | -0.57492800 | 0.27580700  |
| C  | 3.25342800  | -0.68789500 | 0.06073800  |
| C  | 1.37141900  | -1.11387200 | 1.65766600  |
| O  | 4.08556900  | -0.11228500 | 0.72088200  |
| O  | 0.72791400  | -2.13601200 | 1.73733300  |
| O  | 3.55294200  | -1.47225000 | -0.97156300 |
| C  | 4.95696200  | -1.59574700 | -1.27169100 |
| C  | 1.78557000  | -0.32537700 | 2.86732300  |
| H  | -4.55491200 | 0.98864400  | 0.90759800  |
| H  | -0.67504700 | -1.27574500 | -1.29844400 |
| H  | -2.96152400 | -2.11247100 | -1.60355000 |
| H  | -0.02742400 | 2.87333500  | 1.75903100  |
| H  | -2.52373300 | 2.65257200  | 1.89849400  |
| H  | 1.91674200  | 1.47307900  | 0.86095300  |
| H  | 2.86079000  | 1.33447400  | -1.33734400 |
| H  | 1.47563600  | 1.18295100  | -3.39020300 |
| H  | 0.03059300  | 0.86904500  | -2.41696400 |
| H  | 1.35714300  | -0.31969000 | -2.46800000 |
| H  | 1.90972600  | 3.39868200  | -2.25212000 |
| H  | 1.91323300  | 3.49988500  | -0.47796600 |
| H  | 0.40418800  | 3.15357800  | -1.34539200 |
| H  | 1.26045800  | -1.21505400 | -0.45428300 |
| H  | 5.36985900  | -0.61096600 | -1.50398900 |
| H  | 5.48068000  | -2.02311100 | -0.41344100 |
| H  | 5.01980000  | -2.25714700 | -2.13461900 |
| H  | 2.80649500  | 0.04832000  | 2.75179500  |
| H  | 1.68712000  | -0.94263600 | 3.76131900  |
| H  | 1.11827800  | 0.54114600  | 2.95239200  |
| Cl | -5.46894800 | -1.23829300 | -0.62573600 |

Compound **1a**, optimization level PCM-M11/6-311++G(2d,p)

## Conformation #59

|    |             |             |             |
|----|-------------|-------------|-------------|
| C  | 4.20264600  | 0.02276400  | -0.45966500 |
| C  | 3.79782800  | -0.53272800 | 0.72969700  |
| C  | 2.43426800  | -0.45298700 | 1.01609600  |
| C  | 1.51583400  | 0.16306500  | 0.14098700  |
| C  | 1.97893500  | 0.71469100  | -1.05881900 |
| C  | 3.32173900  | 0.64270400  | -1.35776900 |
| C  | 0.21600600  | 0.05912300  | 0.74615400  |
| C  | 0.39933100  | -0.59829500 | 1.92837100  |
| N  | 1.72886100  | -0.90664200 | 2.09746700  |
| C  | -1.07991400 | 0.59121200  | 0.19064500  |
| C  | -1.44644500 | 1.93314500  | 0.87565900  |
| C  | -0.34395500 | 2.96507300  | 0.62681000  |
| C  | -2.79325100 | 2.50322600  | 0.42527600  |
| C  | -2.20645000 | -0.45600500 | 0.34010000  |
| C  | -3.37030700 | -0.17612900 | -0.59725200 |
| C  | -1.72542400 | -1.87680800 | 0.00082600  |
| O  | -3.25323100 | 0.19454800  | -1.73995300 |
| O  | -1.94759600 | -2.78628700 | 0.76666500  |
| O  | -4.54550400 | -0.43311800 | -0.02641500 |
| C  | -5.70052000 | -0.20247500 | -0.85544800 |
| C  | -1.00084100 | -2.06950600 | -1.30252500 |
| Cl | 5.90562000  | -0.04374400 | -0.88378400 |
| H  | 4.50529100  | -1.00611400 | 1.40355200  |
| H  | 1.29238000  | 1.19815100  | -1.75117800 |
| H  | 3.71114700  | 1.06082700  | -2.28090700 |
| H  | -0.32881300 | -0.88759900 | 2.67738600  |
| H  | 2.11465500  | -1.40285800 | 2.88663800  |
| H  | -0.94949600 | 0.77841800  | -0.88607900 |
| H  | -1.49833000 | 1.72897000  | 1.95567800  |
| H  | -0.24012200 | 3.15379200  | -0.45067200 |
| H  | -0.59287100 | 3.91534800  | 1.11121300  |
| H  | 0.62474400  | 2.62809000  | 1.00817400  |
| H  | -2.94722800 | 3.48734500  | 0.88088000  |
| H  | -3.63943800 | 1.87532300  | 0.72686200  |
| H  | -2.81980700 | 2.62588100  | -0.66440100 |
| H  | -2.58632600 | -0.48550000 | 1.36638000  |
| H  | -6.56376400 | -0.45839600 | -0.24268100 |
| H  | -5.73149800 | 0.84935100  | -1.15240800 |
| H  | -5.65087300 | -0.83603700 | -1.74409700 |
| H  | -0.98711500 | -3.12852900 | -1.56416400 |
| H  | -1.46565700 | -1.47428100 | -2.09400600 |
| H  | 0.02932300  | -1.71362300 | -1.18134000 |

Compound **1a**, optimization level PCM-M11/6-311++G(2d,p)

## Conformation #99

|    |             |             |             |
|----|-------------|-------------|-------------|
| C  | -3.93676200 | -0.34450000 | -0.39307500 |
| C  | -3.67789900 | 0.32603200  | 0.77517900  |
| C  | -2.34236600 | 0.64622100  | 1.02375600  |
| C  | -1.29279900 | 0.31165000  | 0.13775800  |
| C  | -1.62075300 | -0.36999600 | -1.04505800 |
| C  | -2.93270200 | -0.69631000 | -1.30511500 |
| C  | -0.07061100 | 0.79740200  | 0.73978100  |
| C  | -0.43856200 | 1.37885800  | 1.91930900  |
| N  | -1.79479300 | 1.29887600  | 2.09370500  |
| C  | 1.35642700  | 0.71671500  | 0.26093900  |
| C  | 1.73233000  | 1.78750700  | -0.79411000 |
| C  | 0.99740400  | 1.61625600  | -2.12352500 |
| C  | 1.49719400  | 3.18979300  | -0.23366700 |
| C  | 1.69225600  | -0.71031400 | -0.23176100 |
| C  | 3.13126000  | -0.78655900 | -0.70965300 |
| C  | 1.40705000  | -1.77019300 | 0.84069300  |
| O  | 3.45552300  | -1.13047200 | -1.82008600 |
| O  | 0.77604600  | -2.75757500 | 0.53713000  |
| O  | 4.00444000  | -0.40531100 | 0.22161600  |
| C  | 5.38885600  | -0.41631000 | -0.17706900 |
| C  | 1.88949400  | -1.52946300 | 2.24372400  |
| H  | -4.47240000 | 0.59088300  | 1.46621600  |
| H  | -0.86232200 | -0.63747200 | -1.77488600 |
| H  | -3.20160800 | -1.22290000 | -2.21558100 |
| H  | 0.18901100  | 1.85352100  | 2.66493800  |
| H  | -2.30172600 | 1.64786700  | 2.89319500  |
| H  | 1.99622900  | 0.91250800  | 1.13263700  |
| H  | 2.81152900  | 1.67901700  | -0.97962100 |
| H  | 1.31760700  | 2.39032200  | -2.82953500 |
| H  | -0.08458900 | 1.72230500  | -1.98031200 |
| H  | 1.19689400  | 0.64374000  | -2.58920900 |
| H  | 1.89169400  | 3.94751700  | -0.91924400 |
| H  | 1.98534600  | 3.31876200  | 0.74012500  |
| H  | 0.42432600  | 3.37430600  | -0.10229500 |
| H  | 1.08570200  | -0.98877900 | -1.09336300 |
| H  | 5.67919100  | -1.42697100 | -0.47318800 |
| H  | 5.53340500  | 0.27044600  | -1.01491400 |
| H  | 5.95307000  | -0.08898300 | 0.69514200  |
| H  | 2.90663800  | -1.12984900 | 2.24622800  |
| H  | 1.83035500  | -2.45676000 | 2.81499100  |
| H  | 1.23440200  | -0.77967600 | 2.70376900  |
| Cl | -5.59507000 | -0.77916600 | -0.77170300 |

Compound **1a**, optimization level PCM- $\omega$ B97XD/6-311++G(2d,p)

## Conformation #1

|    |             |             |             |
|----|-------------|-------------|-------------|
| C  | 4.21578600  | -0.07598000 | -0.37048000 |
| C  | 3.75775200  | -0.25909200 | 0.91414000  |
| C  | 2.38252400  | -0.13405500 | 1.10420700  |
| C  | 1.49536100  | 0.16731100  | 0.04978100  |
| C  | 2.01061900  | 0.34248600  | -1.23868000 |
| C  | 3.36847000  | 0.22000100  | -1.44688700 |
| C  | 0.17118400  | 0.20878300  | 0.60560800  |
| C  | 0.31392000  | -0.06616600 | 1.93578900  |
| N  | 1.63610200  | -0.26729400 | 2.24135700  |
| C  | -1.09614300 | 0.49117900  | -0.15174200 |
| C  | -1.55400300 | 1.97070000  | -0.06892100 |
| C  | -1.92312100 | 2.42381200  | 1.34171100  |
| C  | -0.49716600 | 2.89483800  | -0.67028900 |
| C  | -2.21377400 | -0.48372200 | 0.27441400  |
| C  | -3.44846200 | -0.29035200 | -0.58816700 |
| C  | -1.79117900 | -1.95807200 | 0.18033800  |
| O  | -3.44829300 | -0.32067200 | -1.79469000 |
| O  | -2.05948800 | -2.71071000 | 1.08842300  |
| O  | -4.53550200 | -0.09078100 | 0.14798900  |
| C  | -5.76130300 | 0.09798900  | -0.57273700 |
| C  | -1.06316600 | -2.41368500 | -1.05058300 |
| H  | 4.43032900  | -0.48985700 | 1.72970300  |
| H  | 1.35770800  | 0.57430900  | -2.07199300 |
| H  | 3.78766600  | 0.35145100  | -2.43565700 |
| H  | -0.43488200 | -0.14419700 | 2.70856600  |
| H  | 1.99008400  | -0.49724200 | 3.15361500  |
| H  | -0.89777700 | 0.29731200  | -1.21038800 |
| H  | -2.44995500 | 2.05402500  | -0.69479200 |
| H  | -2.25598600 | 3.46387000  | 1.32246400  |
| H  | -1.06033000 | 2.36218100  | 2.01003500  |
| H  | -2.73214700 | 1.83002200  | 1.77255300  |
| H  | -0.24485400 | 2.59979200  | -1.69194400 |
| H  | 0.42105600  | 2.87855700  | -0.07709400 |
| H  | -0.86213200 | 3.92395800  | -0.69673100 |
| H  | -2.49845500 | -0.32209200 | 1.31255300  |
| H  | -6.52387800 | 0.24955300  | 0.18544000  |
| H  | -5.98576100 | -0.78477300 | -1.17011300 |
| H  | -5.68554500 | 0.97159300  | -1.21903200 |
| H  | -0.03748600 | -2.03564800 | -1.01359100 |
| H  | -1.53126600 | -2.00425100 | -1.94703100 |
| H  | -1.04224500 | -3.50078100 | -1.08697200 |
| Cl | 5.93797700  | -0.22031000 | -0.68164100 |

Compound **1a**, optimization level PCM- $\omega$ B97XD /6-311++G(2d,p)

## Conformation #4

|    |             |             |             |
|----|-------------|-------------|-------------|
| C  | -3.82449600 | -0.11424400 | -0.03474100 |
| C  | -3.24618400 | -0.51175000 | 1.14888300  |
| C  | -1.86467000 | -0.69876700 | 1.13077500  |
| C  | -1.08489500 | -0.49233400 | -0.02748200 |
| C  | -1.72275700 | -0.09244700 | -1.20669200 |
| C  | -3.08898800 | 0.09586600  | -1.20904800 |
| C  | 0.28154900  | -0.76725200 | 0.32326200  |
| C  | 0.26713500  | -1.12070700 | 1.64126000  |
| N  | -1.01536500 | -1.08533200 | 2.12890600  |
| C  | 1.45926800  | -0.66973400 | -0.61026100 |
| C  | 2.26082300  | -1.98593700 | -0.71375400 |
| C  | 1.35902400  | -3.09421500 | -1.25716500 |
| C  | 3.49938200  | -1.84067200 | -1.59691300 |
| C  | 2.33656500  | 0.58482200  | -0.34115400 |
| C  | 1.43940200  | 1.79037000  | -0.12906000 |
| C  | 3.32687200  | 0.50431700  | 0.81979200  |
| O  | 1.33771300  | 2.40393800  | 0.90482900  |
| O  | 3.22982400  | -0.31777100 | 1.69999800  |
| O  | 0.75075200  | 2.07303600  | -1.22911500 |
| C  | -0.24216500 | 3.09894100  | -1.10884000 |
| C  | 4.46169200  | 1.49019500  | 0.77331200  |
| Cl | -5.56168700 | 0.14413500  | -0.08190100 |
| H  | -3.83449200 | -0.66854100 | 2.04353900  |
| H  | -1.15509500 | 0.08035400  | -2.11333800 |
| H  | -3.59981700 | 0.40832700  | -2.11032000 |
| H  | 1.09074400  | -1.38961400 | 2.28141300  |
| H  | -1.27817200 | -1.29241500 | 3.07672700  |
| H  | 1.04636400  | -0.49274400 | -1.60916300 |
| H  | 2.58494900  | -2.26601200 | 0.29154700  |
| H  | 0.47015900  | -3.22765300 | -0.63782700 |
| H  | 1.03029100  | -2.85848900 | -2.27476700 |
| H  | 1.89638800  | -4.04464400 | -1.29024100 |
| H  | 3.97982500  | -2.81144800 | -1.73625900 |
| H  | 4.24742000  | -1.17081900 | -1.16650900 |
| H  | 3.23047200  | -1.45658300 | -2.58658100 |
| H  | 2.92044800  | 0.79231800  | -1.24320800 |
| H  | 0.22002100  | 4.04463800  | -0.82892600 |
| H  | -0.70298400 | 3.17444900  | -2.08957100 |
| H  | -0.98358200 | 2.81015600  | -0.36382200 |
| H  | 4.09741000  | 2.49410200  | 0.54897900  |
| H  | 5.00487300  | 1.48700000  | 1.71601400  |
| H  | 5.13936800  | 1.20231200  | -0.03645300 |



Compound **1a**, optimization level PCM- $\omega$ B97XD/6-311++G(2d,p)

## Conformation #6

|    |             |             |             |
|----|-------------|-------------|-------------|
| C  | 4.13309400  | -0.11047600 | -0.48013500 |
| C  | 3.74376200  | -0.24455700 | 0.83285200  |
| C  | 2.38113000  | -0.10368100 | 1.09150100  |
| C  | 1.44030000  | 0.16635100  | 0.07582900  |
| C  | 1.88660000  | 0.29157200  | -1.24381900 |
| C  | 3.23066300  | 0.15231000  | -1.51976500 |
| C  | 0.14784500  | 0.23626500  | 0.69948500  |
| C  | 0.36007100  | 0.00669400  | 2.02902700  |
| N  | 1.69581300  | -0.19235400 | 2.27059300  |
| C  | -1.15717400 | 0.50004100  | 0.00074700  |
| C  | -1.59772000 | 1.98631000  | 0.04582500  |
| C  | -1.89050300 | 2.49824500  | 1.45419000  |
| C  | -0.56696700 | 2.87532500  | -0.64648400 |
| C  | -2.25267700 | -0.44540000 | 0.53665600  |
| C  | -3.59178700 | -0.22338100 | -0.14600000 |
| C  | -1.88033700 | -1.93408400 | 0.43331700  |
| O  | -4.61723800 | 0.01416400  | 0.44154900  |
| O  | -2.17266600 | -2.67576900 | 1.34316100  |
| O  | -3.50293500 | -0.32726200 | -1.46860500 |
| C  | -4.71377200 | -0.12207200 | -2.20749300 |
| C  | -1.17159600 | -2.42304900 | -0.79697700 |
| H  | 4.45833900  | -0.45022700 | 1.61898600  |
| H  | 1.19130800  | 0.49775600  | -2.04910900 |
| H  | 3.59677200  | 0.24526700  | -2.53367600 |
| H  | -0.34579200 | -0.03807600 | 2.84376300  |
| H  | 2.09668600  | -0.39272300 | 3.17028300  |
| H  | -1.01519800 | 0.26224600  | -1.05747400 |
| H  | -2.52447900 | 2.05396700  | -0.53605700 |
| H  | -2.21498900 | 3.54019800  | 1.41098400  |
| H  | -0.99520200 | 2.45327300  | 2.07973500  |
| H  | -2.68161400 | 1.92963400  | 1.94774400  |
| H  | -0.36972300 | 2.53646200  | -1.66669600 |
| H  | 0.38048700  | 2.87499200  | -0.10105200 |
| H  | -0.92576700 | 3.90570400  | -0.69672200 |
| H  | -2.43531900 | -0.26310100 | 1.59433800  |
| H  | -4.44349900 | -0.25153500 | -3.25135300 |
| H  | -5.09222900 | 0.88450100  | -2.03280400 |
| H  | -5.46369100 | -0.85481500 | -1.91243200 |
| H  | -0.13933500 | -2.06241500 | -0.77738200 |
| H  | -1.64019500 | -2.02596600 | -1.69818400 |
| H  | -1.17099000 | -3.51077800 | -0.81263500 |
| Cl | 5.83534500  | -0.27737800 | -0.87739900 |

Compound **1a**, optimization level PCM- $\omega$ B97XD/6-311++G(2d,p)

## Conformation #7

|    |             |             |             |
|----|-------------|-------------|-------------|
| C  | -3.92289500 | -0.30294600 | -0.40448400 |
| C  | -3.65934600 | 0.32503900  | 0.78965100  |
| C  | -2.32660400 | 0.64549600  | 1.04356800  |
| C  | -1.27899900 | 0.35755700  | 0.13849800  |
| C  | -1.60872600 | -0.28062700 | -1.06577300 |
| C  | -2.92053400 | -0.61009500 | -1.33285900 |
| C  | -0.05715900 | 0.81673800  | 0.75459500  |
| C  | -0.42235400 | 1.33969000  | 1.96065800  |
| N  | -1.77682600 | 1.25034800  | 2.13791300  |
| C  | 1.36838200  | 0.75106900  | 0.27166000  |
| C  | 1.73779000  | 1.81839300  | -0.78795200 |
| C  | 0.99470600  | 1.68159000  | -2.11494900 |
| C  | 1.55489400  | 3.22228700  | -0.21554000 |
| C  | 1.72697400  | -0.68410600 | -0.17460700 |
| C  | 3.16302300  | -0.82794800 | -0.64376500 |
| C  | 1.47279200  | -1.67737100 | 0.97499200  |
| O  | 3.47499900  | -1.38256300 | -1.67018200 |
| O  | 1.98172900  | -1.51863200 | 2.05798000  |
| O  | 4.03429500  | -0.29020200 | 0.19927600  |
| C  | 5.41512800  | -0.38247700 | -0.17065400 |
| C  | 0.56139600  | -2.82511500 | 0.66231200  |
| H  | -4.44560600 | 0.55472900  | 1.49691000  |
| H  | -0.85230400 | -0.51820200 | -1.80197700 |
| H  | -3.18236500 | -1.10378800 | -2.25931800 |
| H  | 0.20259200  | 1.77540700  | 2.72494200  |
| H  | -2.27760200 | 1.55711400  | 2.95366200  |
| H  | 1.99674500  | 0.95749800  | 1.14202100  |
| H  | 2.80697700  | 1.69151200  | -0.99130000 |
| H  | 1.36416000  | 2.42470100  | -2.82523600 |
| H  | -0.07678900 | 1.85076200  | -1.98537200 |
| H  | 1.13533400  | 0.69863600  | -2.57089600 |
| H  | 1.92549900  | 3.97175700  | -0.91857500 |
| H  | 2.09785700  | 3.34170900  | 0.72574100  |
| H  | 0.49915500  | 3.43140500  | -0.02388400 |
| H  | 1.12072900  | -0.98958600 | -1.02479400 |
| H  | 5.71417100  | -1.42649300 | -0.25632800 |
| H  | 5.58498300  | 0.12795500  | -1.11824800 |
| H  | 5.96413600  | 0.10665900  | 0.62870900  |
| H  | -0.42154100 | -2.43063100 | 0.38787500  |
| H  | 0.47261300  | -3.49287400 | 1.51655000  |
| H  | 0.93962000  | -3.36752300 | -0.20836600 |
| Cl | -5.57938700 | -0.74029700 | -0.78624800 |

Compound **1a**, optimization level PCM- $\omega$ B97XD/6-311++G(2d,p)

## Conformation #8

|    |             |             |             |
|----|-------------|-------------|-------------|
| C  | -3.74248300 | -0.18867800 | -0.13807900 |
| C  | -3.19125000 | -0.53013000 | 1.07582000  |
| C  | -1.81297800 | -0.73813100 | 1.09340900  |
| C  | -1.00963100 | -0.60778400 | -0.06010900 |
| C  | -1.62056100 | -0.26420800 | -1.27098900 |
| C  | -2.98365500 | -0.05505600 | -1.30823100 |
| C  | 0.34715100  | -0.87428400 | 0.33262400  |
| C  | 0.30386800  | -1.15242400 | 1.66657000  |
| N  | -0.98710900 | -1.07659200 | 2.12784200  |
| C  | 1.55087200  | -0.80617100 | -0.56957500 |
| C  | 2.50975200  | -2.00497600 | -0.39358000 |
| C  | 1.79186000  | -3.29634900 | -0.78760200 |
| C  | 3.79214000  | -1.85416100 | -1.21077900 |
| C  | 2.25411100  | 0.58018900  | -0.51852000 |
| C  | 1.21378100  | 1.65176000  | -0.79362400 |
| C  | 3.07236600  | 0.89787300  | 0.73201000  |
| O  | 0.81263200  | 1.92379600  | -1.89785000 |
| O  | 3.06164000  | 0.19677700  | 1.71585600  |
| O  | 0.75753700  | 2.21238800  | 0.32053900  |
| C  | -0.34666900 | 3.11390600  | 0.17274200  |
| C  | 3.95912400  | 2.11164900  | 0.63500300  |
| Cl | -5.47385900 | 0.09527600  | -0.23021200 |
| H  | -3.79747200 | -0.62845700 | 1.96680100  |
| H  | -1.03426700 | -0.14772600 | -2.17448800 |
| H  | -3.47354400 | 0.21470500  | -2.23455200 |
| H  | 1.11034400  | -1.38784800 | 2.34089900  |
| H  | -1.27110200 | -1.23843300 | 3.07832900  |
| H  | 1.17663000  | -0.87136300 | -1.59882600 |
| H  | 2.78426300  | -2.07008400 | 0.66167200  |
| H  | 1.53664400  | -3.28401200 | -1.85233200 |
| H  | 2.43309200  | -4.16203500 | -0.60703500 |
| H  | 0.86947600  | -3.43243600 | -0.22032300 |
| H  | 4.38314000  | -2.77079100 | -1.15435000 |
| H  | 4.42609400  | -1.03996600 | -0.85281600 |
| H  | 3.56450100  | -1.66947600 | -2.26595200 |
| H  | 2.94574400  | 0.64210800  | -1.36290800 |
| H  | -0.57034900 | 3.46749000  | 1.17498500  |
| H  | -0.07473500 | 3.94594800  | -0.47538800 |
| H  | -1.20083200 | 2.57938700  | -0.24418800 |
| H  | 3.44070300  | 2.95428900  | 0.17488900  |
| H  | 4.32616900  | 2.38890100  | 1.62103300  |
| H  | 4.80960700  | 1.86441600  | -0.00763800 |

Compound **1a**, optimization level PCM- $\omega$ B97XD/6-311++G(2d,p)

## Conformation #9

|    |             |             |             |
|----|-------------|-------------|-------------|
| C  | -4.33232900 | -0.23326200 | -0.33667200 |
| C  | -3.88448300 | 0.57908400  | 0.68022300  |
| C  | -2.50484900 | 0.62213000  | 0.87522200  |
| C  | -1.60546600 | -0.11953600 | 0.08134400  |
| C  | -2.10963700 | -0.93017200 | -0.94042300 |
| C  | -3.47233300 | -0.98572700 | -1.14792100 |
| C  | -0.28043900 | 0.17281900  | 0.55251000  |
| C  | -0.43315100 | 1.05207400  | 1.58496000  |
| N  | -1.76439400 | 1.32480500  | 1.78415900  |
| C  | 0.98188900  | -0.43172500 | 0.00416100  |
| C  | 1.21633000  | -1.83631200 | 0.62890900  |
| C  | 2.16409400  | -2.72255600 | -0.18020700 |
| C  | 1.64732900  | -1.77917800 | 2.09293800  |
| C  | 2.16522600  | 0.54723400  | 0.15975400  |
| C  | 3.40205700  | 0.06945000  | -0.57935100 |
| C  | 1.84802000  | 1.95849400  | -0.36791000 |
| O  | 3.44925100  | -0.14095100 | -1.76636300 |
| O  | 2.18265400  | 2.92000300  | 0.28547200  |
| O  | 4.44059400  | -0.06790700 | 0.23870600  |
| C  | 5.66156000  | -0.51797100 | -0.36358700 |
| C  | 1.15339400  | 2.08956200  | -1.69185400 |
| Cl | -6.05964400 | -0.33489300 | -0.63631700 |
| H  | -4.56881100 | 1.15200500  | 1.29207200  |
| H  | -1.44468600 | -1.51347500 | -1.56706300 |
| H  | -3.88518100 | -1.60616100 | -1.93230100 |
| H  | 0.31082200  | 1.52317800  | 2.20807900  |
| H  | -2.12678500 | 1.95629400  | 2.47695500  |
| H  | 0.83272000  | -0.58683600 | -1.06970900 |
| H  | 0.23194400  | -2.31462700 | 0.59424600  |
| H  | 3.20673200  | -2.41291000 | -0.07856500 |
| H  | 2.10326400  | -3.75171300 | 0.18120700  |
| H  | 1.90922200  | -2.71999900 | -1.24220500 |
| H  | 1.62608300  | -2.78025500 | 2.52889800  |
| H  | 0.98579600  | -1.14173400 | 2.68374000  |
| H  | 2.66859200  | -1.40092600 | 2.19249400  |
| H  | 2.42649600  | 0.67189700  | 1.20950400  |
| H  | 6.38156900  | -0.57736600 | 0.44718400  |
| H  | 5.51595900  | -1.49783200 | -0.81811700 |
| H  | 5.99300900  | 0.19237100  | -1.11981700 |
| H  | 1.62645000  | 1.44283600  | -2.43220200 |
| H  | 0.11616800  | 1.76183200  | -1.58351200 |
| H  | 1.17209200  | 3.12735000  | -2.01769700 |

Compound **1a**, optimization level PCM- $\omega$ B97XD/6-311++G(2d,p)

## Conformation #16

|    |             |             |             |
|----|-------------|-------------|-------------|
| C  | -4.15962400 | 0.00642600  | -0.49700000 |
| C  | -3.76229600 | 0.44986400  | 0.74343800  |
| C  | -2.39765400 | 0.37408000  | 1.01971100  |
| C  | -1.46275000 | -0.12910900 | 0.09099400  |
| C  | -1.91732600 | -0.56480000 | -1.15771000 |
| C  | -3.26336700 | -0.49669100 | -1.45007700 |
| C  | -0.16719000 | -0.05785300 | 0.70656300  |
| C  | -0.37131200 | 0.47508100  | 1.94739100  |
| N  | -1.70589800 | 0.73456800  | 2.14164000  |
| C  | 1.12938100  | -0.49886900 | 0.08346000  |
| C  | 1.56881800  | -1.92182600 | 0.51114400  |
| C  | 1.89798600  | -2.04405700 | 1.99750900  |
| C  | 0.51989700  | -2.95525700 | 0.10577000  |
| C  | 2.22089900  | 0.55707200  | 0.33326200  |
| C  | 3.57692800  | 0.15539600  | -0.22354800 |
| C  | 1.83332100  | 1.91735400  | -0.27386300 |
| O  | 4.59595500  | 0.14927600  | 0.42283900  |
| O  | 1.25204900  | 1.99102100  | -1.32872400 |
| O  | 3.51084000  | -0.17816500 | -1.50645700 |
| C  | 4.73817500  | -0.58940000 | -2.12068600 |
| C  | 2.22901700  | 3.12310200  | 0.52499400  |
| H  | -4.47233900 | 0.83591400  | 1.46294300  |
| H  | -1.22572100 | -0.95571000 | -1.89469600 |
| H  | -3.63585600 | -0.82881700 | -2.41012400 |
| H  | 0.33670500  | 0.69737000  | 2.73072700  |
| H  | -2.10152300 | 1.13945700  | 2.97220500  |
| H  | 0.97547900  | -0.52853100 | -0.99799900 |
| H  | 2.47989600  | -2.14933400 | -0.05406600 |
| H  | 2.22951300  | -3.05990700 | 2.22381600  |
| H  | 1.01751000  | -1.83676900 | 2.61125400  |
| H  | 2.69595100  | -1.36369200 | 2.30377700  |
| H  | 0.29350200  | -2.89453500 | -0.96178400 |
| H  | -0.41203500 | -2.80490500 | 0.65734000  |
| H  | 0.87757100  | -3.96520700 | 0.31861600  |
| H  | 2.38533700  | 0.70147800  | 1.40069600  |
| H  | 4.48573000  | -0.81775200 | -3.15200500 |
| H  | 5.13052900  | -1.47347400 | -1.61899900 |
| H  | 5.47069900  | 0.21560200  | -2.07558700 |
| H  | 3.28210000  | 3.05599200  | 0.81011300  |
| H  | 1.64904500  | 3.13054600  | 1.45271900  |
| H  | 2.04256900  | 4.03727300  | -0.03445100 |
| Cl | -5.86538400 | 0.07193500  | -0.91090300 |

Compound **1a**, optimization level PCM- $\omega$ B97XD/6-311++G(2d,p)

## Conformation #19

|    |             |             |             |
|----|-------------|-------------|-------------|
| C  | -3.83535900 | -0.58006000 | -0.41591100 |
| C  | -3.68333600 | 0.32574900  | 0.60700100  |
| C  | -2.39185800 | 0.80018700  | 0.83136400  |
| C  | -1.27787400 | 0.39497800  | 0.06067000  |
| C  | -1.49410100 | -0.52901200 | -0.97146200 |
| C  | -2.76317900 | -1.01417100 | -1.20539300 |
| C  | -0.12633000 | 1.07837500  | 0.59871200  |
| C  | -0.59319200 | 1.83506400  | 1.63350000  |
| N  | -1.94657200 | 1.68230200  | 1.77421700  |
| C  | 1.32394900  | 1.01874800  | 0.19405800  |
| C  | 1.66512300  | 1.82981500  | -1.08140200 |
| C  | 1.00528500  | 1.31861600  | -2.36033200 |
| C  | 1.34432800  | 3.30832900  | -0.87258200 |
| C  | 1.81799300  | -0.44003700 | 0.12637300  |
| C  | 3.31478600  | -0.53524400 | -0.10414200 |
| C  | 1.52614000  | -1.16813600 | 1.45457000  |
| O  | 4.13555400  | 0.23040200  | 0.33255700  |
| O  | 1.95859400  | -0.73805500 | 2.49645500  |
| O  | 3.61619400  | -1.61326400 | -0.82623300 |
| C  | 5.01069000  | -1.84671600 | -1.06204500 |
| C  | 0.69799600  | -2.41323200 | 1.36572900  |
| H  | -4.52235700 | 0.65035900  | 1.20848300  |
| H  | -0.68143600 | -0.87010600 | -1.59912600 |
| H  | -2.93797500 | -1.72837200 | -1.99911500 |
| H  | -0.04328400 | 2.48392200  | 2.29767900  |
| H  | -2.51178600 | 2.12646100  | 2.47671400  |
| H  | 1.89006200  | 1.48265900  | 1.00650400  |
| H  | 2.74872100  | 1.74995700  | -1.21087100 |
| H  | 1.36205100  | 1.89549400  | -3.21668300 |
| H  | -0.08070700 | 1.42873600  | -2.31642900 |
| H  | 1.23603900  | 0.26900000  | -2.55884700 |
| H  | 1.69127200  | 3.89739100  | -1.72471900 |
| H  | 1.82797200  | 3.69665500  | 0.02764600  |
| H  | 0.26719400  | 3.46474600  | -0.77005800 |
| H  | 1.32749400  | -0.98902500 | -0.67545600 |
| H  | 5.44458200  | -1.01066900 | -1.60931800 |
| H  | 5.53548500  | -1.97978100 | -0.11661100 |
| H  | 5.05812400  | -2.75530400 | -1.65520800 |
| H  | -0.28073800 | -2.16134500 | 0.94769400  |
| H  | 0.58153500  | -2.87030700 | 2.34603900  |
| H  | 1.16909600  | -3.11463400 | 0.67185300  |
| Cl | -5.43437800 | -1.22200800 | -0.75083400 |

Compound **1a**, optimization level PCM- $\omega$ B97XD/6-311++G(2d,p)

## Conformation #33

|    |             |             |             |
|----|-------------|-------------|-------------|
| C  | 4.03774100  | -0.06777400 | 0.45157900  |
| C  | 3.61277200  | 0.33462700  | -0.79445000 |
| C  | 2.26237000  | 0.13988700  | -1.08022900 |
| C  | 1.36975800  | -0.44255100 | -0.15582800 |
| C  | 1.85009500  | -0.83407000 | 1.09790000  |
| C  | 3.18317800  | -0.64588600 | 1.39984500  |
| C  | 0.07866700  | -0.49276500 | -0.78239500 |
| C  | 0.24052900  | 0.05347800  | -2.02167800 |
| N  | 1.54805000  | 0.43310300  | -2.20771900 |
| C  | -1.19102600 | -0.96368500 | -0.12625500 |
| C  | -2.18852900 | -1.57118500 | -1.13560100 |
| C  | -1.58411800 | -2.83033700 | -1.76279300 |
| C  | -3.54756300 | -1.91355200 | -0.52832200 |
| C  | -1.72215100 | 0.19714200  | 0.76666900  |
| C  | -2.20787900 | 1.36760400  | -0.06094200 |
| C  | -2.68565100 | -0.24766900 | 1.87233000  |
| O  | -3.17586300 | 1.35571500  | -0.78191400 |
| O  | -2.46676200 | -1.27875900 | 2.46479200  |
| O  | -1.41628400 | 2.42840000  | 0.08350500  |
| C  | -1.75234500 | 3.57766600  | -0.70250500 |
| C  | -3.81201200 | 0.66830200  | 2.25424700  |
| Cl | 5.72749000  | 0.15127600  | 0.87785400  |
| H  | 4.29245700  | 0.77856600  | -1.50995000 |
| H  | 1.18951200  | -1.28305600 | 1.83104700  |
| H  | 3.57683300  | -0.94173800 | 2.36330000  |
| H  | -0.48044000 | 0.20403600  | -2.80988100 |
| H  | 1.91787700  | 0.83959400  | -3.04918500 |
| H  | -0.93199100 | -1.75433500 | 0.58588000  |
| H  | -2.36275900 | -0.83920000 | -1.92983100 |
| H  | -1.43249200 | -3.59993300 | -0.99915500 |
| H  | -2.25800700 | -3.23908900 | -2.51910000 |
| H  | -0.62249600 | -2.63157100 | -2.23742200 |
| H  | -4.18033700 | -2.38325000 | -1.28501400 |
| H  | -4.07360600 | -1.02515000 | -0.17629000 |
| H  | -3.44336500 | -2.61277500 | 0.30501100  |
| H  | -0.85981300 | 0.55898100  | 1.33628400  |
| H  | -1.00669500 | 4.32809900  | -0.45645000 |
| H  | -1.71033500 | 3.33151800  | -1.76316900 |
| H  | -2.75030100 | 3.93212100  | -0.44676400 |
| H  | -4.32092900 | 0.28792600  | 3.13696500  |
| H  | -3.42312900 | 1.67165100  | 2.45016200  |
| H  | -4.51541300 | 0.75596100  | 1.42358200  |

Compound **1a**, optimization level PCM- $\omega$ B97XD/6-311++G(2d,p)

## Conformation #35

|    |             |             |             |
|----|-------------|-------------|-------------|
| C  | 4.22808900  | -0.12475300 | -0.38706100 |
| C  | 3.75994700  | -0.36749800 | 0.88381100  |
| C  | 2.38725200  | -0.21686300 | 1.07639000  |
| C  | 1.51264500  | 0.16362500  | 0.03707200  |
| C  | 2.03809600  | 0.39658000  | -1.23783300 |
| C  | 3.39343400  | 0.25235300  | -1.44817200 |
| C  | 0.18829900  | 0.21607800  | 0.58997000  |
| C  | 0.31816800  | -0.12903000 | 1.90518200  |
| N  | 1.63342300  | -0.38788100 | 2.20317700  |
| C  | -1.06560700 | 0.58788400  | -0.15456600 |
| C  | -1.50207800 | 2.05768100  | 0.06886800  |
| C  | -1.91548100 | 2.36841800  | 1.50595300  |
| C  | -0.40763400 | 3.01782300  | -0.39332200 |
| C  | -2.18422600 | -0.41963900 | 0.15868500  |
| C  | -3.44502500 | -0.14901600 | -0.64304600 |
| C  | -1.73496200 | -1.85366500 | -0.18352700 |
| O  | -3.46549900 | 0.16318900  | -1.80649400 |
| O  | -1.19025400 | -2.09666700 | -1.23266300 |
| O  | -4.53657100 | -0.33201900 | 0.09635600  |
| C  | -5.79138600 | -0.14655000 | -0.57225800 |
| C  | -2.02382700 | -2.89997600 | 0.84972000  |
| H  | 4.42299000  | -0.65955100 | 1.68748800  |
| H  | 1.39419300  | 0.68885400  | -2.05896700 |
| H  | 3.82052000  | 0.42759300  | -2.42675000 |
| H  | -0.43288600 | -0.21387800 | 2.67533600  |
| H  | 1.97782400  | -0.66992500 | 3.10431200  |
| H  | -0.85630800 | 0.48202700  | -1.22224100 |
| H  | -2.37208500 | 2.22292700  | -0.57478600 |
| H  | -2.24099200 | 3.40821400  | 1.58326000  |
| H  | -1.07721800 | 2.23080300  | 2.19399600  |
| H  | -2.74297200 | 1.74169700  | 1.84695200  |
| H  | -0.11849700 | 2.82240900  | -1.42910000 |
| H  | 0.48586400  | 2.92322000  | 0.22980300  |
| H  | -0.75486900 | 4.05155000  | -0.32880300 |
| H  | -2.45282400 | -0.39331100 | 1.21431500  |
| H  | -6.55268900 | -0.34266300 | 0.17706600  |
| H  | -5.88257900 | -0.84605000 | -1.40237800 |
| H  | -5.87285800 | 0.87533400  | -0.94082000 |
| H  | -3.08145400 | -2.86678400 | 1.12394400  |
| H  | -1.45293300 | -2.66600100 | 1.75296100  |
| H  | -1.75545500 | -3.88939000 | 0.48573800  |
| Cl | 5.94797900  | -0.29462600 | -0.70037300 |



Compound **1a**, optimization level PCM- $\omega$ B97XD/6-311++G(2d,p)

## Conformation #46

|    |             |             |             |
|----|-------------|-------------|-------------|
| C  | -3.86320600 | -0.60224200 | -0.37646900 |
| C  | -3.70861100 | 0.43135500  | 0.51627100  |
| C  | -2.40840400 | 0.89563000  | 0.71036400  |
| C  | -1.28944900 | 0.35447700  | 0.03762000  |
| C  | -1.50769500 | -0.69754000 | -0.86250900 |
| C  | -2.78555700 | -1.17222000 | -1.06636700 |
| C  | -0.13256800 | 1.08156900  | 0.50033900  |
| C  | -0.60093900 | 1.99352300  | 1.40152400  |
| N  | -1.96019900 | 1.89372400  | 1.52857500  |
| C  | 1.32063600  | 0.94054600  | 0.13348500  |
| C  | 1.70607200  | 1.62336200  | -1.20469700 |
| C  | 1.01415500  | 1.03853300  | -2.43408600 |
| C  | 1.46783900  | 3.12948800  | -1.12453800 |
| C  | 1.78305000  | -0.53378100 | 0.18000600  |
| C  | 3.28778500  | -0.62315300 | -0.00812000 |
| C  | 1.41351500  | -1.23509900 | 1.49552200  |
| O  | 4.09717200  | 0.00693500  | 0.62741300  |
| O  | 0.85313000  | -2.30622600 | 1.45933400  |
| O  | 3.60865300  | -1.49375900 | -0.95861400 |
| C  | 5.01009300  | -1.66390700 | -1.21256800 |
| C  | 1.76258500  | -0.55689600 | 2.78834500  |
| H  | -4.55161000 | 0.86092100  | 1.04128500  |
| H  | -0.69026500 | -1.14520100 | -1.41165700 |
| H  | -2.96355300 | -1.98392300 | -1.75926200 |
| H  | -0.04921900 | 2.72291300  | 1.97480000  |
| H  | -2.52973900 | 2.45254700  | 2.13994000  |
| H  | 1.89054900  | 1.46578000  | 0.90609400  |
| H  | 2.78519900  | 1.47504600  | -1.32647400 |
| H  | 1.38108700  | 1.53341100  | -3.33604400 |
| H  | -0.06652300 | 1.19197000  | -2.38645900 |
| H  | 1.20346600  | -0.03088700 | -2.55080200 |
| H  | 1.84477600  | 3.62255600  | -2.02339200 |
| H  | 1.97381500  | 3.56700400  | -0.25993200 |
| H  | 0.40105900  | 3.35227900  | -1.03950700 |
| H  | 1.31645300  | -1.12028900 | -0.60748700 |
| H  | 5.45053700  | -0.71988700 | -1.53125600 |
| H  | 5.51391000  | -2.02183900 | -0.31558100 |
| H  | 5.07426100  | -2.40188700 | -2.00668100 |
| H  | 2.75817800  | -0.11448400 | 2.73897400  |
| H  | 1.69306400  | -1.26746200 | 3.60930600  |
| H  | 1.04949900  | 0.25483700  | 2.95551600  |
| Cl | -5.47358700 | -1.23687900 | -0.66948200 |

Compound **1a**, optimization level PCM- $\omega$ B97XD/6-311++G(2d,p)

## Conformation #59

|    |             |             |             |
|----|-------------|-------------|-------------|
| C  | 4.17502500  | -0.06660800 | -0.48570900 |
| C  | 3.78639900  | -0.36693600 | 0.79986000  |
| C  | 2.43022300  | -0.21840000 | 1.08683900  |
| C  | 1.49541400  | 0.21540900  | 0.12314600  |
| C  | 1.94053600  | 0.50861600  | -1.16977600 |
| C  | 3.27867800  | 0.36684700  | -1.47227500 |
| C  | 0.20988300  | 0.24312600  | 0.76012300  |
| C  | 0.41740000  | -0.16035200 | 2.04707100  |
| N  | 1.74658000  | -0.43736500 | 2.24993900  |
| C  | -1.09397300 | 0.65892100  | 0.13308900  |
| C  | -1.51584300 | 2.06085700  | 0.64514800  |
| C  | -0.43534800 | 3.09125900  | 0.31533300  |
| C  | -2.86336500 | 2.54262000  | 0.10846400  |
| C  | -2.18539700 | -0.41027100 | 0.37638600  |
| C  | -3.33439600 | -0.30726700 | -0.61392500 |
| C  | -1.65801200 | -1.85169600 | 0.25991700  |
| O  | -3.20486700 | -0.09715200 | -1.79421000 |
| O  | -1.89465300 | -2.64690900 | 1.13949600  |
| O  | -4.50528700 | -0.53323400 | -0.02611700 |
| C  | -5.65635300 | -0.49599800 | -0.87994000 |
| C  | -0.87884800 | -2.23013400 | -0.96884100 |
| Cl | 5.86942600  | -0.23345900 | -0.91596300 |
| H  | 4.49699900  | -0.70081800 | 1.54456400  |
| H  | 1.24801500  | 0.84385800  | -1.93315600 |
| H  | 3.64484700  | 0.58751100  | -2.46622500 |
| H  | -0.28937400 | -0.28112800 | 2.85338900  |
| H  | 2.14305800  | -0.76866900 | 3.11210400  |
| H  | -0.94472200 | 0.72883000  | -0.94936100 |
| H  | -1.59396100 | 1.98582700  | 1.73654000  |
| H  | -0.31168000 | 3.18213100  | -0.76866200 |
| H  | -0.71537800 | 4.07295900  | 0.70335800  |
| H  | 0.53081400  | 2.82066900  | 0.74343800  |
| H  | -3.05799000 | 3.55754700  | 0.46187700  |
| H  | -3.69668200 | 1.92425100  | 0.44767100  |
| H  | -2.86891600 | 2.56051600  | -0.98457200 |
| H  | -2.59131100 | -0.31968700 | 1.38449500  |
| H  | -6.50449800 | -0.70589900 | -0.23494100 |
| H  | -5.75488000 | 0.49076100  | -1.33162400 |
| H  | -5.57216200 | -1.25165700 | -1.65997400 |
| H  | -0.96446500 | -3.30174500 | -1.14021900 |
| H  | -1.21010700 | -1.67092400 | -1.84362000 |
| H  | 0.17240100  | -1.98558500 | -0.79608500 |

Compound **1a**, optimization level PCM- $\omega$ B97XD/6-311++G(2d,p)

## Conformation #99

|    |             |             |             |
|----|-------------|-------------|-------------|
| C  | -3.94688900 | -0.34488800 | -0.38453400 |
| C  | -3.67835400 | 0.30694500  | 0.79535900  |
| C  | -2.34332100 | 0.62680800  | 1.03891200  |
| C  | -1.29928600 | 0.31276500  | 0.13901000  |
| C  | -1.63362200 | -0.35008900 | -1.05026500 |
| C  | -2.94762800 | -0.67704200 | -1.30805800 |
| C  | -0.07588500 | 0.79051900  | 0.73689300  |
| C  | -0.43672600 | 1.34884900  | 1.92896700  |
| N  | -1.78971500 | 1.26118300  | 2.11483000  |
| C  | 1.34495300  | 0.72998800  | 0.24163000  |
| C  | 1.69914700  | 1.81678900  | -0.80642900 |
| C  | 0.92472600  | 1.70450800  | -2.11781800 |
| C  | 1.53706400  | 3.21179500  | -0.20729800 |
| C  | 1.70949300  | -0.68911400 | -0.25186700 |
| C  | 3.15731600  | -0.78894300 | -0.70361000 |
| C  | 1.41933800  | -1.78546100 | 0.78543700  |
| O  | 3.49441500  | -1.22537200 | -1.77591200 |
| O  | 0.83724300  | -2.78593100 | 0.43429400  |
| O  | 4.00969800  | -0.34725100 | 0.21562800  |
| C  | 5.40025800  | -0.39504000 | -0.12849300 |
| C  | 1.85992300  | -1.57907400 | 2.20619400  |
| H  | -4.46210700 | 0.55755000  | 1.49821900  |
| H  | -0.88004600 | -0.60614400 | -1.78288000 |
| H  | -3.21415700 | -1.18875200 | -2.22333900 |
| H  | 0.18989400  | 1.81157600  | 2.67613500  |
| H  | -2.28795300 | 1.59299800  | 2.92231400  |
| H  | 1.98279600  | 0.93805100  | 1.10562900  |
| H  | 2.76340500  | 1.68842500  | -1.03594300 |
| H  | 1.27049000  | 2.46755400  | -2.81869400 |
| H  | -0.14457300 | 1.86065900  | -1.95696100 |
| H  | 1.06117900  | 0.73418500  | -2.60062100 |
| H  | 1.89858300  | 3.96979400  | -0.90574800 |
| H  | 2.09984400  | 3.31295600  | 0.72444700  |
| H  | 0.48690700  | 3.42480600  | 0.00852400  |
| H  | 1.12350800  | -0.96042000 | -1.12623500 |
| H  | 5.70162800  | -1.42057100 | -0.33774500 |
| H  | 5.59129600  | 0.23104800  | -0.99942700 |
| H  | 5.92824300  | -0.01124700 | 0.73950200  |
| H  | 2.86428800  | -1.15786300 | 2.25027100  |
| H  | 1.81315200  | -2.52251500 | 2.74595200  |
| H  | 1.18143200  | -0.86279700 | 2.67727700  |
| Cl | -5.60668800 | -0.77970800 | -0.75533800 |

Compound **1a**, optimization level SMD-B3LYP/6-311++G(2d,p)

## Conformation #1

|    |             |             |             |
|----|-------------|-------------|-------------|
| C  | 4.24167800  | -0.14625100 | -0.37714300 |
| C  | 3.78645200  | -0.22005500 | 0.92477300  |
| C  | 2.41260900  | -0.05791700 | 1.11054000  |
| C  | 1.51414300  | 0.17538000  | 0.03436000  |
| C  | 2.03217800  | 0.23849100  | -1.26761600 |
| C  | 3.39311800  | 0.07744400  | -1.47188900 |
| C  | 0.19084800  | 0.28368300  | 0.59663800  |
| C  | 0.34387100  | 0.11170500  | 1.95090000  |
| N  | 1.66990700  | -0.08969300 | 2.26155000  |
| C  | -1.08836700 | 0.53793200  | -0.16676600 |
| C  | -1.55652800 | 2.02942300  | -0.14058900 |
| C  | -1.86057200 | 2.57627600  | 1.25789400  |
| C  | -0.55571900 | 2.93706800  | -0.86346200 |
| C  | -2.22232800 | -0.41969400 | 0.29616200  |
| C  | -3.46353700 | -0.28460600 | -0.58060900 |
| C  | -1.81427500 | -1.91036500 | 0.29002600  |
| O  | -3.45733100 | -0.24431700 | -1.79050100 |
| O  | -2.02575500 | -2.58940800 | 1.27472000  |
| O  | -4.58055200 | -0.25301200 | 0.15721500  |
| C  | -5.82907200 | -0.17765300 | -0.57038200 |
| C  | -1.18498500 | -2.48255100 | -0.94987700 |
| Cl | 5.97552100  | -0.34427500 | -0.68365900 |
| H  | 4.45722800  | -0.39644300 | 1.75559900  |
| H  | 1.38184700  | 0.41226600  | -2.11650600 |
| H  | 3.80616600  | 0.12367600  | -2.47095900 |
| H  | -0.39526500 | 0.10780700  | 2.73612000  |
| H  | 2.03057700  | -0.24690400 | 3.19110200  |
| H  | -0.89138100 | 0.30779800  | -1.21646900 |
| H  | -2.48737500 | 2.06419000  | -0.71651800 |
| H  | -0.95799600 | 2.62934100  | 1.87195800  |
| H  | -2.26401700 | 3.58945800  | 1.17809100  |
| H  | -2.59809700 | 1.97364700  | 1.79300800  |
| H  | -0.94527200 | 3.95708000  | -0.92379800 |
| H  | -0.36559500 | 2.59192600  | -1.88321000 |
| H  | 0.40107400  | 2.98035000  | -0.33641400 |
| H  | -2.51195300 | -0.20320500 | 1.32207400  |
| H  | -6.60510900 | -0.16524700 | 0.19076800  |
| H  | -5.86540400 | 0.73446000  | -1.16503600 |
| H  | -5.94267800 | -1.04802900 | -1.21587900 |
| H  | -1.15901200 | -3.56922700 | -0.88135900 |
| H  | -1.72670500 | -2.17082400 | -1.84471500 |
| H  | -0.16222900 | -2.10754900 | -1.04572600 |

Compound **1a**, optimization level SMD-B3LYP/6-311++G(2d,p)

## Conformation #16

|    |             |             |             |
|----|-------------|-------------|-------------|
| C  | 4.18527100  | -0.07378700 | -0.49992900 |
| C  | 3.79020400  | -0.34308900 | 0.79573300  |
| C  | 2.42564200  | -0.22307100 | 1.06449200  |
| C  | 1.47813100  | 0.15749300  | 0.07567100  |
| C  | 1.93637500  | 0.41567300  | -1.22465300 |
| C  | 3.28700100  | 0.29983000  | -1.51108100 |
| C  | 0.18194000  | 0.17144400  | 0.70599100  |
| C  | 0.39668700  | -0.19576500 | 2.01188200  |
| N  | 1.73693000  | -0.42975400 | 2.23032200  |
| C  | -1.13204400 | 0.52268600  | 0.04499200  |
| C  | -1.60791100 | 1.98414300  | 0.31997700  |
| C  | -1.85544000 | 2.30569300  | 1.79781400  |
| C  | -0.64631100 | 3.00638400  | -0.29527300 |
| C  | -2.22049900 | -0.52504600 | 0.40104600  |
| C  | -3.58933300 | -0.19909900 | -0.19309000 |
| C  | -1.83041500 | -1.94867500 | -0.06046700 |
| O  | -4.60703600 | -0.10508500 | 0.45699300  |
| O  | -1.21366400 | -2.13576800 | -1.08666100 |
| O  | -3.54087400 | -0.04633400 | -1.52068100 |
| C  | -4.78881400 | 0.26638900  | -2.17984600 |
| C  | -2.27433200 | -3.07445400 | 0.83113200  |
| Cl | 5.90426500  | -0.20698500 | -0.90895400 |
| H  | 4.49870800  | -0.63313100 | 1.56072100  |
| H  | 1.24703700  | 0.70372400  | -2.00929100 |
| H  | 3.65394300  | 0.49495500  | -2.51019500 |
| H  | -0.30526600 | -0.31778700 | 2.82138200  |
| H  | 2.14068600  | -0.72050600 | 3.10851900  |
| H  | -0.97782100 | 0.44871300  | -1.03285700 |
| H  | -2.56338500 | 2.09779900  | -0.20443500 |
| H  | -0.92554700 | 2.28497300  | 2.37168200  |
| H  | -2.27818900 | 3.30966700  | 1.89298800  |
| H  | -2.55604700 | 1.61086900  | 2.26664300  |
| H  | -1.04437700 | 4.01843900  | -0.18035300 |
| H  | -0.49871800 | 2.82505900  | -1.36324100 |
| H  | 0.33251400  | 2.97996100  | 0.19087200  |
| H  | -2.38186100 | -0.55885800 | 1.47721000  |
| H  | -4.54376500 | 0.35097200  | -3.23555000 |
| H  | -5.51194000 | -0.53298400 | -2.02044100 |
| H  | -5.18814100 | 1.20880500  | -1.80593400 |
| H  | -3.34139900 | -2.98589000 | 1.05502100  |
| H  | -2.06694300 | -4.03772100 | 0.36706800  |
| H  | -1.74482500 | -3.00303800 | 1.78660400  |

Compound **1a**, optimization level SMD-B3LYP/6-311++G(2d,p)

## Conformation #35

|    |             |             |             |
|----|-------------|-------------|-------------|
| C  | 4.26178300  | -0.12510600 | -0.38258100 |
| C  | 3.79575900  | -0.32199500 | 0.90249700  |
| C  | 2.42085900  | -0.17257200 | 1.09246600  |
| C  | 1.53200800  | 0.16720500  | 0.03667000  |
| C  | 2.06087100  | 0.35128900  | -1.24935700 |
| C  | 3.42282800  | 0.20514100  | -1.45770700 |
| C  | 0.20517300  | 0.23135800  | 0.59594900  |
| C  | 0.34590000  | -0.06894400 | 1.92882300  |
| N  | 1.66902200  | -0.30992600 | 2.22936000  |
| C  | -1.06587500 | 0.56800400  | -0.15084800 |
| C  | -1.53954900 | 2.04359700  | 0.04195600  |
| C  | -1.86737100 | 2.42505500  | 1.48951200  |
| C  | -0.53110400 | 3.03133800  | -0.55472600 |
| C  | -2.18666900 | -0.45236200 | 0.17534600  |
| C  | -3.45035700 | -0.18978200 | -0.63906400 |
| C  | -1.75622000 | -1.90390700 | -0.14569000 |
| O  | -3.47270700 | 0.01694500  | -1.83021200 |
| O  | -1.12526800 | -2.16264700 | -1.14732300 |
| O  | -4.55003700 | -0.24625800 | 0.12654700  |
| C  | -5.81347100 | -0.05207900 | -0.55077600 |
| C  | -2.18355300 | -2.95792400 | 0.83616200  |
| Cl | 5.99792700  | -0.29867900 | -0.69263600 |
| H  | 4.45906000  | -0.57948300 | 1.71799000  |
| H  | 1.41761100  | 0.60565800  | -2.08323100 |
| H  | 3.84406100  | 0.34375600  | -2.44476700 |
| H  | -0.39834800 | -0.13748100 | 2.70609500  |
| H  | 2.02236200  | -0.54972300 | 3.14392100  |
| H  | -0.85548700 | 0.45196900  | -1.21573600 |
| H  | -2.46140200 | 2.14439900  | -0.54028000 |
| H  | -0.97379100 | 2.41433300  | 2.11871400  |
| H  | -2.27901400 | 3.43767900  | 1.52109900  |
| H  | -2.60625200 | 1.75908500  | 1.94157700  |
| H  | -0.92183600 | 4.05133500  | -0.50063000 |
| H  | -0.32555100 | 2.80811200  | -1.60504600 |
| H  | 0.41830300  | 3.01314200  | -0.01282600 |
| H  | -2.45710600 | -0.40930100 | 1.22884800  |
| H  | -6.57210100 | -0.14550500 | 0.22225200  |
| H  | -5.85137400 | 0.93875800  | -1.00234700 |
| H  | -5.95386100 | -0.81507300 | -1.31574900 |
| H  | -3.26011800 | -2.89185800 | 1.01856800  |
| H  | -1.92547100 | -3.95111000 | 0.47115800  |
| H  | -1.68957000 | -2.77587200 | 1.79579400  |

Compound **1a**, optimization level SMD-M06-2x/6-311++G(2d,p)

## Conformation #1

|    |             |             |             |
|----|-------------|-------------|-------------|
| C  | 4.23199600  | -0.06605900 | -0.36091200 |
| C  | 3.76358900  | -0.35692500 | 0.90026200  |
| C  | 2.38454400  | -0.24418300 | 1.08606900  |
| C  | 1.50700400  | 0.14944700  | 0.04928500  |
| C  | 2.03624900  | 0.43068900  | -1.21733600 |
| C  | 3.39770600  | 0.32196500  | -1.42050600 |
| C  | 0.17626900  | 0.14864300  | 0.59438200  |
| C  | 0.30435800  | -0.24160800 | 1.90026900  |
| N  | 1.62534500  | -0.47240400 | 2.19992800  |
| C  | -1.08727200 | 0.49894100  | -0.14297200 |
| C  | -1.51184300 | 1.98080700  | 0.02332300  |
| C  | -1.85555500 | 2.36306600  | 1.46080800  |
| C  | -0.43721600 | 2.91370800  | -0.52917100 |
| C  | -2.22192600 | -0.46489600 | 0.25617600  |
| C  | -3.46569400 | -0.19882100 | -0.57166000 |
| C  | -1.84168200 | -1.93910700 | 0.05507500  |
| O  | -3.47198100 | -0.08615400 | -1.77200300 |
| O  | -2.10305900 | -2.74508100 | 0.91687900  |
| O  | -4.56005600 | -0.12499900 | 0.18141300  |
| C  | -5.78654500 | 0.10234000  | -0.52908000 |
| C  | -1.16083600 | -2.32418500 | -1.22611700 |
| Cl | 5.95627500  | -0.18720300 | -0.66604400 |
| H  | 4.42711100  | -0.65800700 | 1.70056000  |
| H  | 1.38928200  | 0.73147900  | -2.03342300 |
| H  | 3.83080900  | 0.53322200  | -2.38927200 |
| H  | -0.45344200 | -0.38107400 | 2.65661500  |
| H  | 1.97418900  | -0.77972800 | 3.09624400  |
| H  | -0.89968200 | 0.35166000  | -1.21150100 |
| H  | -2.41048500 | 2.11639000  | -0.58882000 |
| H  | -0.98575500 | 2.25094700  | 2.11298100  |
| H  | -2.16681300 | 3.40927900  | 1.49926700  |
| H  | -2.67051600 | 1.76327600  | 1.87119100  |
| H  | -0.78730400 | 3.94803900  | -0.50986100 |
| H  | -0.18195000 | 2.66049500  | -1.56092400 |
| H  | 0.47473500  | 2.85808200  | 0.07118100  |
| H  | -2.47779500 | -0.35903800 | 1.30898200  |
| H  | -6.56266400 | 0.14117100  | 0.22970200  |
| H  | -5.73563300 | 1.04579300  | -1.07077600 |
| H  | -5.97384000 | -0.71424300 | -1.22485800 |
| H  | -1.14775100 | -3.40757500 | -1.32353500 |
| H  | -1.66134900 | -1.86486800 | -2.07997300 |
| H  | -0.13336100 | -1.94909000 | -1.20821900 |

Compound **1a**, optimization level SMD-M06-2x/6-311++G(2d,p)

## Conformation #4

|    |             |             |             |
|----|-------------|-------------|-------------|
| C  | -3.81171300 | -0.12709200 | -0.03364700 |
| C  | -3.23813000 | -0.57988300 | 1.13242300  |
| C  | -1.85402500 | -0.76344900 | 1.10712900  |
| C  | -1.06988000 | -0.49843300 | -0.04053600 |
| C  | -1.70747600 | -0.04256800 | -1.20325400 |
| C  | -3.07571500 | 0.14124200  | -1.19837000 |
| C  | 0.29734700  | -0.79320100 | 0.29896700  |
| C  | 0.27903200  | -1.21482500 | 1.60056500  |
| N  | -1.00710900 | -1.20114700 | 2.08551300  |
| C  | 1.47690300  | -0.65723800 | -0.62979300 |
| C  | 2.31823600  | -1.94831400 | -0.72706300 |
| C  | 1.47454200  | -3.06278000 | -1.34447100 |
| C  | 3.58559200  | -1.74325200 | -1.55450900 |
| C  | 2.31993200  | 0.61323400  | -0.34065100 |
| C  | 1.39602800  | 1.79421100  | -0.11800700 |
| C  | 3.28441900  | 0.53875600  | 0.83783100  |
| O  | 1.30086100  | 2.41391600  | 0.91190000  |
| O  | 3.18889500  | -0.30533000 | 1.69686400  |
| O  | 0.67103500  | 2.05331500  | -1.20376700 |
| C  | -0.32715400 | 3.07173100  | -1.05561500 |
| C  | 4.38941800  | 1.55708300  | 0.83517300  |
| Cl | -5.54834900 | 0.12829100  | -0.07345500 |
| H  | -3.82727600 | -0.78255500 | 2.01747300  |
| H  | -1.13696900 | 0.17368100  | -2.09900700 |
| H  | -3.58909100 | 0.49369200  | -2.08333400 |
| H  | 1.09521600  | -1.52428500 | 2.23248700  |
| H  | -1.27611300 | -1.45602300 | 3.02475500  |
| H  | 1.06541500  | -0.48706700 | -1.63080100 |
| H  | 2.60521700  | -2.24593800 | 0.28420000  |
| H  | 0.55914000  | -3.24011100 | -0.77678800 |
| H  | 1.19329700  | -2.80326300 | -2.36990700 |
| H  | 2.03822300  | -3.99753000 | -1.37711500 |
| H  | 4.09892600  | -2.69627000 | -1.69874100 |
| H  | 4.29338000  | -1.06022900 | -1.07909200 |
| H  | 3.33967000  | -1.34214100 | -2.54305800 |
| H  | 2.91546200  | 0.84741400  | -1.22906000 |
| H  | 0.14295500  | 4.03151200  | -0.84447200 |
| H  | -0.85456100 | 3.10953500  | -2.00481100 |
| H  | -1.01280400 | 2.81038500  | -0.24987900 |
| H  | 4.02011200  | 2.53801900  | 0.53365600  |
| H  | 4.86121600  | 1.60836900  | 1.81430300  |
| H  | 5.12982800  | 1.24335300  | 0.09231000  |



Compound **1a**, optimization level SMD-M06-2x/6-311++G(2d,p)

## Conformation #6

|    |             |             |             |
|----|-------------|-------------|-------------|
| C  | 4.15744200  | -0.06717200 | -0.46865400 |
| C  | 3.76006100  | -0.31446900 | 0.82574700  |
| C  | 2.39196400  | -0.20468200 | 1.08123800  |
| C  | 1.45688700  | 0.14481600  | 0.07962000  |
| C  | 1.91464500  | 0.38195700  | -1.22328700 |
| C  | 3.26414800  | 0.27508000  | -1.49544100 |
| C  | 0.15688900  | 0.15315400  | 0.69451200  |
| C  | 0.35777900  | -0.18971400 | 2.00481400  |
| N  | 1.69515200  | -0.39885500 | 2.24112300  |
| C  | -1.14506400 | 0.46923400  | 0.00994000  |
| C  | -1.57717200 | 1.95159000  | 0.14832000  |
| C  | -1.88670700 | 2.36463700  | 1.58485100  |
| C  | -0.52812300 | 2.87981600  | -0.45770700 |
| C  | -2.24518500 | -0.49226000 | 0.50332900  |
| C  | -3.59164700 | -0.17006100 | -0.11721400 |
| C  | -1.92351800 | -1.97226800 | 0.24578900  |
| O  | -4.58390500 | 0.09237300  | 0.51254100  |
| O  | -2.25140900 | -2.79377600 | 1.07012700  |
| O  | -3.55344800 | -0.21266800 | -1.44909500 |
| C  | -4.78220800 | 0.10511400  | -2.11826900 |
| C  | -1.21852600 | -2.35471800 | -1.02362700 |
| Cl | 5.86367900  | -0.18747500 | -0.86189800 |
| H  | 4.46836700  | -0.58131000 | 1.59930400  |
| H  | 1.22196900  | 0.64675900  | -2.01392400 |
| H  | 3.64265500  | 0.45207100  | -2.49349000 |
| H  | -0.35666100 | -0.30812700 | 2.80567400  |
| H  | 2.09435600  | -0.67038300 | 3.12788500  |
| H  | -1.00400000 | 0.29125300  | -1.06070700 |
| H  | -2.49409200 | 2.06447700  | -0.44275600 |
| H  | -1.00026700 | 2.26762600  | 2.21685600  |
| H  | -2.19930300 | 3.41085100  | 1.60910900  |
| H  | -2.68951500 | 1.77080100  | 2.02636000  |
| H  | -0.89068200 | 3.90997600  | -0.46018600 |
| H  | -0.29451900 | 2.59904500  | -1.48747700 |
| H  | 0.39853400  | 2.85258700  | 0.12161000  |
| H  | -2.38620400 | -0.39916700 | 1.57895800  |
| H  | -4.57156200 | 0.01355100  | -3.17988300 |
| H  | -5.56311700 | -0.59391700 | -1.82280700 |
| H  | -5.08557800 | 1.12319400  | -1.87693400 |
| H  | -1.68813100 | -1.87985500 | -1.88592200 |
| H  | -0.18451600 | -2.00102600 | -0.97763800 |
| H  | -1.22622300 | -3.43708700 | -1.13197100 |

Compound **1a**, optimization level SMD-M06-2x/6-311++G(2d,p)

## Conformation #16

|    |             |             |             |
|----|-------------|-------------|-------------|
| C  | 4.19180600  | -0.03474100 | -0.47345800 |
| C  | 3.78489800  | -0.44126900 | 0.77702800  |
| C  | 2.41552900  | -0.35736300 | 1.03642400  |
| C  | 1.48765800  | 0.11846200  | 0.08066000  |
| C  | 1.95587800  | 0.51732400  | -1.17825900 |
| C  | 3.30670200  | 0.43974300  | -1.45376400 |
| C  | 0.18434600  | 0.06108300  | 0.68485300  |
| C  | 0.37576600  | -0.43873300 | 1.94439700  |
| N  | 1.71154800  | -0.68722000 | 2.16006700  |
| C  | -1.10928400 | 0.47589900  | 0.03721800  |
| C  | -1.53691600 | 1.92372000  | 0.38473600  |
| C  | -1.87081200 | 2.12090200  | 1.86140200  |
| C  | -0.47444500 | 2.92540200  | -0.05962900 |
| C  | -2.21035800 | -0.54823100 | 0.36249800  |
| C  | -3.56391100 | -0.09467400 | -0.15596500 |
| C  | -1.90087100 | -1.93059800 | -0.23031400 |
| O  | -4.52383800 | 0.13037200  | 0.53649000  |
| O  | -1.17636600 | -2.06009000 | -1.18585400 |
| O  | -3.56266000 | 0.03771800  | -1.48097800 |
| C  | -4.78382900 | 0.51761600  | -2.05977100 |
| C  | -2.55564600 | -3.09196500 | 0.45750800  |
| Cl | 5.90034800  | -0.11409000 | -0.86916900 |
| H  | 4.48701800  | -0.80621500 | 1.51546200  |
| H  | 1.26977200  | 0.88343200  | -1.93330500 |
| H  | 3.69224700  | 0.74089100  | -2.41883700 |
| H  | -0.34240000 | -0.64619900 | 2.72339500  |
| H  | 2.10382000  | -1.06991400 | 3.00810300  |
| H  | -0.95690700 | 0.43995300  | -1.04473600 |
| H  | -2.44269600 | 2.13086600  | -0.19811100 |
| H  | -0.99188100 | 1.94172500  | 2.48578200  |
| H  | -2.19731100 | 3.14878000  | 2.03463700  |
| H  | -2.67149600 | 1.45867000  | 2.19725600  |
| H  | -0.83212000 | 3.94716200  | 0.08528600  |
| H  | -0.22550200 | 2.79903700  | -1.11605300 |
| H  | 0.44285900  | 2.80598200  | 0.52291100  |
| H  | -2.33388600 | -0.66581400 | 1.43973800  |
| H  | -4.60353800 | 0.56658100  | -3.12973200 |
| H  | -5.59962500 | -0.17025900 | -1.84241400 |
| H  | -5.01992100 | 1.50638400  | -1.66786800 |
| H  | -3.61913500 | -2.89215100 | 0.61122500  |
| H  | -2.41831600 | -4.00604100 | -0.11588700 |
| H  | -2.10389300 | -3.20225500 | 1.44791500  |

Compound **1a**, optimization level SMD-M06-2x/6-311++G(2d,p)

## Conformation #35

|    |             |             |             |
|----|-------------|-------------|-------------|
| C  | 4.26586900  | -0.01427200 | -0.33654800 |
| C  | 3.78630500  | -0.36230600 | 0.90568700  |
| C  | 2.40247200  | -0.28583500 | 1.07519100  |
| C  | 1.53082100  | 0.12709800  | 0.04056300  |
| C  | 2.07218500  | 0.46802300  | -1.20605200 |
| C  | 3.43837400  | 0.39651700  | -1.39301500 |
| C  | 0.19324900  | 0.08166200  | 0.56550400  |
| C  | 0.31123700  | -0.35036200 | 1.85870200  |
| N  | 1.63356700  | -0.56835500 | 2.16899100  |
| C  | -1.06431400 | 0.44114600  | -0.17868200 |
| C  | -1.52192600 | 1.90264300  | 0.05482700  |
| C  | -1.88864900 | 2.20372900  | 1.50604200  |
| C  | -0.46358000 | 2.88592100  | -0.43864500 |
| C  | -2.17462200 | -0.57696400 | 0.14076200  |
| C  | -3.45327600 | -0.19480000 | -0.58393100 |
| C  | -1.79798700 | -1.99216900 | -0.31387500 |
| O  | -3.58347300 | -0.22649100 | -1.78122000 |
| O  | -1.03479600 | -2.17709200 | -1.22927100 |
| O  | -4.41019600 | 0.20408300  | 0.25165200  |
| C  | -5.63026700 | 0.63774900  | -0.36699800 |
| C  | -2.44590300 | -3.11263500 | 0.44464900  |
| Cl | 5.99686100  | -0.08780100 | -0.62022300 |
| H  | 4.44508300  | -0.67859100 | 1.70403300  |
| H  | 1.43051000  | 0.78535500  | -2.01995500 |
| H  | 3.88037100  | 0.65355400  | -2.34657900 |
| H  | -0.45205700 | -0.52745900 | 2.60146800  |
| H  | 1.97655500  | -0.89989700 | 3.05875900  |
| H  | -0.85373700 | 0.34031700  | -1.24725400 |
| H  | -2.41727000 | 2.05377600  | -0.56025200 |
| H  | -1.01291100 | 2.11526500  | 2.15375100  |
| H  | -2.26116000 | 3.22719900  | 1.58974400  |
| H  | -2.66517200 | 1.53714100  | 1.88628500  |
| H  | -0.83391200 | 3.91085400  | -0.36517700 |
| H  | -0.19771200 | 2.69414000  | -1.48091700 |
| H  | 0.44595500  | 2.81514200  | 0.16367200  |
| H  | -2.38763000 | -0.60487700 | 1.21000700  |
| H  | -6.28631500 | 0.92824600  | 0.44845100  |
| H  | -5.43651000 | 1.48722300  | -1.02094300 |
| H  | -6.07183300 | -0.17645600 | -0.93982100 |
| H  | -3.52275100 | -2.94094500 | 0.52295700  |
| H  | -2.24652900 | -4.06837300 | -0.03502500 |
| H  | -2.04677800 | -3.11538600 | 1.46327200  |

Compound **1a**, optimization level SMD-M11/6-311++G(2d,p)

## Conformation #1

|    |             |             |             |
|----|-------------|-------------|-------------|
| C  | 4.22180400  | -0.01175600 | -0.35647900 |
| C  | 3.76268600  | -0.28138900 | 0.90983600  |
| C  | 2.38143200  | -0.19712400 | 1.09459800  |
| C  | 1.49954300  | 0.14953800  | 0.04915800  |
| C  | 2.01891400  | 0.40990200  | -1.22458400 |
| C  | 3.37995600  | 0.32858200  | -1.42578800 |
| C  | 0.16733800  | 0.13238300  | 0.59277400  |
| C  | 0.30036100  | -0.22331400 | 1.90622100  |
| N  | 1.62541900  | -0.41659600 | 2.21289000  |
| C  | -1.10175100 | 0.43340300  | -0.15739900 |
| C  | -1.56945000 | 1.90576000  | -0.02217000 |
| C  | -1.97526400 | 2.27934800  | 1.40302700  |
| C  | -0.48884300 | 2.85758600  | -0.53373800 |
| C  | -2.21429700 | -0.55137500 | 0.26542800  |
| C  | -3.45815600 | -0.27896300 | -0.55951700 |
| C  | -1.79048800 | -2.01226800 | 0.06913400  |
| O  | -3.50010000 | -0.33848800 | -1.76571300 |
| O  | -2.00573700 | -2.81825900 | 0.94668900  |
| O  | -4.50284400 | 0.05734300  | 0.19285000  |
| C  | -5.71405100 | 0.36443300  | -0.52654300 |
| C  | -1.10716700 | -2.38158600 | -1.21509100 |
| Cl | 5.95185400  | -0.09962600 | -0.66157900 |
| H  | 4.43785000  | -0.54741600 | 1.71826600  |
| H  | 1.35930500  | 0.67393200  | -2.04934800 |
| H  | 3.81108000  | 0.52499900  | -2.40335000 |
| H  | -0.46254000 | -0.36316100 | 2.66406500  |
| H  | 1.98038600  | -0.68878600 | 3.11995300  |
| H  | -0.90768600 | 0.26446800  | -1.22624200 |
| H  | -2.44947400 | 2.01770700  | -0.67346300 |
| H  | -1.13200800 | 2.14747300  | 2.09300200  |
| H  | -2.27509600 | 3.33322000  | 1.44162900  |
| H  | -2.81835500 | 1.68232000  | 1.76934000  |
| H  | -0.86221600 | 3.88815100  | -0.54893600 |
| H  | -0.17056400 | 2.59298400  | -1.54959900 |
| H  | 0.39313500  | 2.82889800  | 0.11898400  |
| H  | -2.46250400 | -0.43532100 | 1.32285500  |
| H  | -6.45349500 | 0.62415800  | 0.23136600  |
| H  | -5.53986000 | 1.20747700  | -1.20092000 |
| H  | -6.03811700 | -0.50921400 | -1.09836100 |
| H  | -1.07118800 | -3.46782300 | -1.31738300 |
| H  | -1.62054500 | -1.92321300 | -2.06615900 |
| H  | -0.08350900 | -1.98477200 | -1.19290300 |

Compound **1a**, optimization level SMD-M11/6-311++G(2d,p)

## Conformation #4

|    |             |             |             |
|----|-------------|-------------|-------------|
| C  | -3.81252700 | -0.12864400 | -0.03181000 |
| C  | -3.23778500 | -0.55919000 | 1.13857500  |
| C  | -1.85303400 | -0.73877200 | 1.11491300  |
| C  | -1.07513100 | -0.48866000 | -0.03648500 |
| C  | -1.71454500 | -0.05684300 | -1.20622800 |
| C  | -3.08074800 | 0.12198700  | -1.20267000 |
| C  | 0.29517400  | -0.77547700 | 0.30368100  |
| C  | 0.28151100  | -1.17933100 | 1.60951100  |
| N  | -1.00268400 | -1.16035600 | 2.09778100  |
| C  | 1.47393500  | -0.65876800 | -0.63088000 |
| C  | 2.30780600  | -1.95755300 | -0.70368500 |
| C  | 1.45640800  | -3.07168300 | -1.31528500 |
| C  | 3.58234600  | -1.76659700 | -1.52691400 |
| C  | 2.32919700  | 0.60670800  | -0.35971600 |
| C  | 1.41249600  | 1.79408700  | -0.13818000 |
| C  | 3.29559000  | 0.53510700  | 0.81822100  |
| O  | 1.34494800  | 2.43711700  | 0.88262600  |
| O  | 3.19275800  | -0.30248400 | 1.68505700  |
| O  | 0.65294900  | 2.03116100  | -1.20508500 |
| C  | -0.34654800 | 3.05492400  | -1.04465200 |
| C  | 4.40690500  | 1.54607300  | 0.80143500  |
| Cl | -5.55363400 | 0.12159800  | -0.07407400 |
| H  | -3.82908000 | -0.74981600 | 2.02976600  |
| H  | -1.14146800 | 0.14500700  | -2.10915600 |
| H  | -3.60058000 | 0.45733300  | -2.09578800 |
| H  | 1.10673400  | -1.48056600 | 2.24134100  |
| H  | -1.26914500 | -1.40318100 | 3.04271000  |
| H  | 1.06075800  | -0.50057600 | -1.63772300 |
| H  | 2.58408200  | -2.24251300 | 0.31820400  |
| H  | 0.53111200  | -3.23096100 | -0.74979000 |
| H  | 1.18431300  | -2.81814200 | -2.34935600 |
| H  | 2.01037200  | -4.01754500 | -1.33511800 |
| H  | 4.08997000  | -2.72761100 | -1.67005900 |
| H  | 4.29745900  | -1.08615200 | -1.04816500 |
| H  | 3.34168000  | -1.36250900 | -2.52048000 |
| H  | 2.92491400  | 0.83153000  | -1.25475400 |
| H  | 0.13352500  | 4.02069300  | -0.86323700 |
| H  | -0.90790200 | 3.07599800  | -1.97967500 |
| H  | -1.00402300 | 2.80244700  | -0.20723500 |
| H  | 4.03689900  | 2.52763600  | 0.48874800  |
| H  | 4.88675200  | 1.60606900  | 1.78028700  |
| H  | 5.14267300  | 1.21762100  | 0.05451200  |

Compound **1a**, optimization level SMD-M11/6-311++G(2d,p)

## Conformation #6

|    |             |             |             |
|----|-------------|-------------|-------------|
| C  | 4.14911900  | -0.07361600 | -0.46771200 |
| C  | 3.75597700  | -0.27881900 | 0.83238400  |
| C  | 2.38801600  | -0.16486800 | 1.08684300  |
| C  | 1.45516300  | 0.14769600  | 0.07543700  |
| C  | 1.90797000  | 0.34164900  | -1.23503200 |
| C  | 3.25500200  | 0.23066600  | -1.50499500 |
| C  | 0.15386200  | 0.17414100  | 0.68949800  |
| C  | 0.35375800  | -0.12407500 | 2.00903900  |
| N  | 1.69118300  | -0.32248400 | 2.25261500  |
| C  | -1.14919500 | 0.46310800  | -0.00694700 |
| C  | -1.58950500 | 1.94683900  | 0.09236000  |
| C  | -1.94747300 | 2.37035600  | 1.51636600  |
| C  | -0.51221000 | 2.86495800  | -0.48304500 |
| C  | -2.24462000 | -0.48666100 | 0.52061500  |
| C  | -3.58663700 | -0.17885500 | -0.11832600 |
| C  | -1.90225100 | -1.96819500 | 0.30089200  |
| O  | -4.58201300 | 0.11995300  | 0.49467700  |
| O  | -2.19357000 | -2.77254700 | 1.15781000  |
| O  | -3.54396700 | -0.26467600 | -1.44848800 |
| C  | -4.77220100 | 0.04403300  | -2.13581500 |
| C  | -1.20860600 | -2.36765000 | -0.96976600 |
| Cl | 5.85883300  | -0.20086600 | -0.86020700 |
| H  | 4.47054100  | -0.51865300 | 1.61467400  |
| H  | 1.20802400  | 0.57760100  | -2.03470800 |
| H  | 3.63488500  | 0.37588500  | -2.51233300 |
| H  | -0.36731800 | -0.21712700 | 2.81357500  |
| H  | 2.09151000  | -0.55906600 | 3.15067100  |
| H  | -1.00780500 | 0.25160400  | -1.07578700 |
| H  | -2.48767400 | 2.05086900  | -0.53517500 |
| H  | -1.08959200 | 2.23577900  | 2.18768500  |
| H  | -2.22027400 | 3.43210900  | 1.53348200  |
| H  | -2.79492500 | 1.80406800  | 1.91980000  |
| H  | -0.87394700 | 3.89882800  | -0.52722700 |
| H  | -0.22417700 | 2.55867700  | -1.49630200 |
| H  | 0.38674000  | 2.84951200  | 0.14656300  |
| H  | -2.38542400 | -0.36084000 | 1.59670300  |
| H  | -4.56007900 | -0.08125100 | -3.19804400 |
| H  | -5.56047500 | -0.64293600 | -1.81635800 |
| H  | -5.06673400 | 1.07515200  | -1.92086600 |
| H  | -1.68950600 | -1.90312300 | -1.83614000 |
| H  | -0.17273700 | -2.00589400 | -0.93428100 |
| H  | -1.21010000 | -3.45516900 | -1.06347900 |

Compound **1a**, optimization level SMD-M11/6-311++G(2d,p)

## Conformation #16

|    |             |             |             |
|----|-------------|-------------|-------------|
| C  | 4.18419900  | -0.02377000 | -0.47447700 |
| C  | 3.78003900  | -0.45193800 | 0.76651200  |
| C  | 2.41084300  | -0.37425800 | 1.02876700  |
| C  | 1.48644700  | 0.11729100  | 0.08227100  |
| C  | 1.95143900  | 0.53804100  | -1.16946500 |
| C  | 3.29964000  | 0.46659300  | -1.44672400 |
| C  | 0.18168300  | 0.04997000  | 0.68476100  |
| C  | 0.37085100  | -0.47162400 | 1.93396100  |
| N  | 1.70612700  | -0.72444300 | 2.14613400  |
| C  | -1.11291600 | 0.47368400  | 0.04288300  |
| C  | -1.54296800 | 1.91421200  | 0.41934100  |
| C  | -1.89481600 | 2.06464900  | 1.89915600  |
| C  | -0.46232100 | 2.91934300  | 0.02323300  |
| C  | -2.21216700 | -0.55413400 | 0.35988000  |
| C  | -3.55986000 | -0.09308600 | -0.16904400 |
| C  | -1.89758600 | -1.92770600 | -0.25167600 |
| O  | -4.53465300 | 0.11388300  | 0.51242700  |
| O  | -1.18303600 | -2.03488000 | -1.21961200 |
| O  | -3.53932100 | 0.07523000  | -1.49022600 |
| C  | -4.75929000 | 0.56609900  | -2.07721000 |
| C  | -2.53215100 | -3.10219800 | 0.43270800  |
| Cl | 5.89628700  | -0.09370800 | -0.87328400 |
| H  | 4.48732300  | -0.82998200 | 1.49934500  |
| H  | 1.25945600  | 0.91748000  | -1.91907400 |
| H  | 3.68740900  | 0.78532600  | -2.41013700 |
| H  | -0.35457400 | -0.69150900 | 2.70935700  |
| H  | 2.09874200  | -1.11955000 | 2.99028300  |
| H  | -0.96358000 | 0.45101600  | -1.04403000 |
| H  | -2.44213500 | 2.14156300  | -0.17348700 |
| H  | -1.02425900 | 1.83942800  | 2.52824900  |
| H  | -2.19956200 | 3.09655100  | 2.11041400  |
| H  | -2.71859600 | 1.40672300  | 2.20022900  |
| H  | -0.81474800 | 3.94513700  | 0.18304100  |
| H  | -0.18479400 | 2.81281900  | -1.03278400 |
| H  | 0.44130100  | 2.77558900  | 0.62953600  |
| H  | -2.34111900 | -0.68332400 | 1.43886800  |
| H  | -4.56502000 | 0.64818600  | -3.14702100 |
| H  | -5.57437700 | -0.13738900 | -1.88683100 |
| H  | -5.00627400 | 1.54424500  | -1.65442300 |
| H  | -3.59617500 | -2.90546700 | 0.61210800  |
| H  | -2.40234900 | -4.01210300 | -0.15598800 |
| H  | -2.05674800 | -3.22147200 | 1.41525900  |

Compound **1a**, optimization level SMD-M11/6-311++G(2d,p)

## Conformation #1

|    |             |             |             |
|----|-------------|-------------|-------------|
| C  | 4.25105700  | -0.10775300 | -0.37901100 |
| C  | 3.76877800  | -0.49539600 | 0.84723600  |
| C  | 2.39199500  | -0.36118200 | 1.03777000  |
| C  | 1.53607600  | 0.14610900  | 0.03662300  |
| C  | 2.07945600  | 0.52367800  | -1.19719300 |
| C  | 3.43605400  | 0.39573300  | -1.40394500 |
| C  | 0.20082900  | 0.13896100  | 0.57249100  |
| C  | 0.30660500  | -0.36622300 | 1.83841300  |
| N  | 1.61897800  | -0.66331800 | 2.12375600  |
| C  | -1.04704900 | 0.59263800  | -0.13980400 |
| C  | -1.43991000 | 2.05643600  | 0.18704900  |
| C  | -1.88680800 | 2.24905100  | 1.63623600  |
| C  | -0.28939600 | 3.00691700  | -0.14349600 |
| C  | -2.18923300 | -0.38952300 | 0.14871700  |
| C  | -3.45107900 | -0.02948200 | -0.61556400 |
| C  | -1.81650000 | -1.81568200 | -0.29951200 |
| O  | -3.46575100 | 0.42643200  | -1.73215400 |
| O  | -1.19089000 | -1.99682500 | -1.31674600 |
| O  | -4.55523600 | -0.31893900 | 0.07470000  |
| C  | -5.80032600 | -0.06322700 | -0.60441000 |
| C  | -2.28536800 | -2.92518900 | 0.59130500  |
| Cl | 5.97706300  | -0.24885600 | -0.68840100 |
| H  | 4.42313600  | -0.88503900 | 1.62195500  |
| H  | 1.44148500  | 0.91291700  | -1.98843500 |
| H  | 3.88421800  | 0.67948200  | -2.35194800 |
| H  | -0.46637000 | -0.54522500 | 2.57766700  |
| H  | 1.95246700  | -1.06088300 | 2.99176000  |
| H  | -0.85292400 | 0.54060300  | -1.21871100 |
| H  | -2.28314600 | 2.30607300  | -0.46987300 |
| H  | -1.09009400 | 1.95737700  | 2.33278300  |
| H  | -2.11792800 | 3.30504000  | 1.82021100  |
| H  | -2.78547800 | 1.66893500  | 1.87863200  |
| H  | -0.61047600 | 4.04966700  | -0.03534900 |
| H  | 0.06579500  | 2.86323300  | -1.17149800 |
| H  | 0.55777500  | 2.84382700  | 0.53529300  |
| H  | -2.43469700 | -0.42657400 | 1.21445200  |
| H  | -6.58624600 | -0.36252900 | 0.08967400  |
| H  | -5.88187800 | 1.00096500  | -0.84208400 |
| H  | -5.85140500 | -0.65444900 | -1.52284600 |
| H  | -3.35544000 | -2.80293200 | 0.79902200  |
| H  | -2.08775900 | -3.89941200 | 0.14049100  |
| H  | -1.76001600 | -2.83783600 | 1.55151000  |



Compound **1a**, optimization level SMD- $\omega$ B97X-D/6-311++G(2d,p)

## Conformation #1

|    |             |             |             |
|----|-------------|-------------|-------------|
| C  | 4.21839400  | -0.08764600 | -0.36567900 |
| C  | 3.76109000  | -0.24892500 | 0.92218200  |
| C  | 2.38527200  | -0.11987300 | 1.10910900  |
| C  | 1.49867100  | 0.16444700  | 0.04816800  |
| C  | 2.01429500  | 0.31687600  | -1.24343000 |
| C  | 3.37289800  | 0.19021200  | -1.44897100 |
| C  | 0.17438900  | 0.21707100  | 0.60229400  |
| C  | 0.31682900  | -0.03558100 | 1.93778900  |
| N  | 1.63837400  | -0.23460900 | 2.24677700  |
| C  | -1.09225300 | 0.49237400  | -0.15977800 |
| C  | -1.54867200 | 1.97319300  | -0.09117400 |
| C  | -1.89671000 | 2.45109700  | 1.31617700  |
| C  | -0.50380300 | 2.88946800  | -0.72332300 |
| C  | -2.21183600 | -0.47578100 | 0.27764300  |
| C  | -3.45355300 | -0.28409900 | -0.57579000 |
| C  | -1.79707200 | -1.95257100 | 0.18316700  |
| O  | -3.46266300 | -0.29556600 | -1.78262400 |
| O  | -2.05381800 | -2.70188900 | 1.09788200  |
| O  | -4.54078300 | -0.11546500 | 0.16930800  |
| C  | -5.77371500 | 0.06242100  | -0.54281200 |
| C  | -1.08918200 | -2.41533000 | -1.05535100 |
| Cl | 5.94361000  | -0.23834600 | -0.67335700 |
| H  | 4.43047800  | -0.46645400 | 1.74473700  |
| H  | 1.35858700  | 0.53389000  | -2.07907300 |
| H  | 3.79164600  | 0.30441600  | -2.44072800 |
| H  | -0.43369300 | -0.09818800 | 2.71097400  |
| H  | 1.99478700  | -0.44096100 | 3.16612800  |
| H  | -0.88920800 | 0.28867400  | -1.21536700 |
| H  | -2.45465200 | 2.04687200  | -0.70360300 |
| H  | -1.01864900 | 2.43042800  | 1.96767000  |
| H  | -2.25769900 | 3.48224200  | 1.27897000  |
| H  | -2.67885700 | 1.84715300  | 1.78226400  |
| H  | -0.87568000 | 3.91641800  | -0.76927400 |
| H  | -0.25945000 | 2.57275400  | -1.74091700 |
| H  | 0.42120400  | 2.89601400  | -0.13949600 |
| H  | -2.48435300 | -0.30833300 | 1.31814000  |
| H  | -6.53573700 | 0.19110600  | 0.22187900  |
| H  | -5.72053700 | 0.94774400  | -1.17676300 |
| H  | -5.99135500 | -0.81644100 | -1.15002400 |
| H  | -1.07449800 | -3.50351300 | -1.09023800 |
| H  | -1.56410800 | -2.00700800 | -1.94916200 |
| H  | -0.06035100 | -2.04341800 | -1.03435200 |

Compound **1a**, optimization level SMD- $\omega$ B97X-D/6-311++G(2d,p)

## Conformation #6

|    |             |             |             |
|----|-------------|-------------|-------------|
| C  | 4.13616400  | -0.08484600 | -0.48384400 |
| C  | 3.74769900  | -0.29383200 | 0.81964800  |
| C  | 2.38407600  | -0.17009100 | 1.08412600  |
| C  | 1.44319900  | 0.15470000  | 0.08326700  |
| C  | 1.88976300  | 0.35399400  | -1.22755500 |
| C  | 3.23510700  | 0.23370300  | -1.50963100 |
| C  | 0.15051500  | 0.18879700  | 0.70902400  |
| C  | 0.36310200  | -0.11363000 | 2.02475700  |
| N  | 1.69868800  | -0.32562800 | 2.25496600  |
| C  | -1.15469900 | 0.49290700  | 0.02609000  |
| C  | -1.59002500 | 1.97624700  | 0.15369700  |
| C  | -1.84736300 | 2.42376500  | 1.59013900  |
| C  | -0.57611700 | 2.89738000  | -0.52024200 |
| C  | -2.25317900 | -0.47541600 | 0.51310000  |
| C  | -3.59758400 | -0.21712100 | -0.14663800 |
| C  | -1.88976600 | -1.95744900 | 0.31983500  |
| O  | -4.62786800 | -0.06453500 | 0.46097300  |
| O  | -2.16714300 | -2.74938000 | 1.19178400  |
| O  | -3.51268900 | -0.19407900 | -1.47390200 |
| C  | -4.73188400 | 0.04955900  | -2.18744800 |
| C  | -1.20479300 | -2.37841500 | -0.94714400 |
| Cl | 5.84207100  | -0.22440500 | -0.88842200 |
| H  | 4.45938100  | -0.54238500 | 1.59666700  |
| H  | 1.19100400  | 0.60247100  | -2.01830100 |
| H  | 3.60109400  | 0.38383100  | -2.51734500 |
| H  | -0.34525900 | -0.20253400 | 2.83442500  |
| H  | 2.10331200  | -0.56858900 | 3.14488900  |
| H  | -1.00994700 | 0.31313100  | -1.04279100 |
| H  | -2.53065400 | 2.07312500  | -0.40105700 |
| H  | -0.93207100 | 2.37545900  | 2.18666700  |
| H  | -2.19582300 | 3.45981100  | 1.59963900  |
| H  | -2.60828500 | 1.81740500  | 2.08714700  |
| H  | -0.94112100 | 3.92779800  | -0.52322500 |
| H  | -0.39456100 | 2.59978700  | -1.55659300 |
| H  | 0.38156300  | 2.88477300  | 0.00807900  |
| H  | -2.42601700 | -0.35294900 | 1.58099800  |
| H  | -4.46461700 | 0.01794400  | -3.24086300 |
| H  | -5.46682800 | -0.72267800 | -1.95990800 |
| H  | -5.13101000 | 1.03056800  | -1.92828500 |
| H  | -1.67570700 | -1.92363800 | -1.81986000 |
| H  | -0.16714100 | -2.03259900 | -0.92011100 |
| H  | -1.21703200 | -3.46398900 | -1.02968500 |

Compound **1a**, optimization level SMD- $\omega$ B97X-D/6-311++G(2d,p)

## Conformation #35

|    |             |             |             |
|----|-------------|-------------|-------------|
| C  | 4.24166100  | -0.09754500 | -0.39289600 |
| C  | 3.76467400  | -0.48649300 | 0.83785100  |
| C  | 2.39027500  | -0.35658200 | 1.03617100  |
| C  | 1.52366400  | 0.14558600  | 0.04106200  |
| C  | 2.05957200  | 0.52556700  | -1.19416500 |
| C  | 3.41696400  | 0.40327900  | -1.41008800 |
| C  | 0.19515500  | 0.13533800  | 0.58731000  |
| C  | 0.31590900  | -0.36292400 | 1.85392500  |
| N  | 1.62850200  | -0.65666500 | 2.12878300  |
| C  | -1.05594100 | 0.59150400  | -0.11463100 |
| C  | -1.45563700 | 2.04995600  | 0.22820400  |
| C  | -1.81894100 | 2.26405900  | 1.69563800  |
| C  | -0.36285200 | 3.02666700  | -0.20010900 |
| C  | -2.20033000 | -0.40375100 | 0.13619600  |
| C  | -3.45321800 | -0.04941000 | -0.64499800 |
| C  | -1.80241400 | -1.82939800 | -0.29459200 |
| O  | -3.46585100 | 0.37736800  | -1.77163600 |
| O  | -1.25574700 | -2.02827800 | -1.35262200 |
| O  | -4.55290200 | -0.30672100 | 0.06126400  |
| C  | -5.80153000 | -0.06190700 | -0.60006900 |
| C  | -2.14712000 | -2.92592000 | 0.66484600  |
| Cl | 5.96641200  | -0.23378200 | -0.71083100 |
| H  | 4.41836600  | -0.87211400 | 1.60991100  |
| H  | 1.42008000  | 0.91494100  | -1.97815200 |
| H  | 3.85073400  | 0.69164500  | -2.35915800 |
| H  | -0.44394100 | -0.53945400 | 2.59990100  |
| H  | 1.96815800  | -1.04894900 | 2.99224300  |
| H  | -0.85515800 | 0.56610700  | -1.18876900 |
| H  | -2.34334300 | 2.27470100  | -0.37166900 |
| H  | -0.96225900 | 2.07267500  | 2.34805400  |
| H  | -2.13125600 | 3.29966700  | 1.85447500  |
| H  | -2.64172200 | 1.62139300  | 2.01873700  |
| H  | -0.69783600 | 4.05807900  | -0.06109300 |
| H  | -0.10259100 | 2.89523600  | -1.25400700 |
| H  | 0.54667300  | 2.88934900  | 0.39201800  |
| H  | -2.46441400 | -0.43680300 | 1.19272000  |
| H  | -6.57090700 | -0.33792300 | 0.11699800  |
| H  | -5.89138100 | 0.99236200  | -0.86277000 |
| H  | -5.88333200 | -0.67566100 | -1.49741400 |
| H  | -3.21231900 | -2.87966300 | 0.90933900  |
| H  | -1.89589100 | -3.90064900 | 0.24964300  |
| H  | -1.59953400 | -2.76108500 | 1.59766300  |

Compound **1b**, optimization level PCM-B3LYP/6-311++G(2d,p)

Conformation #1

|    |             |             |             |
|----|-------------|-------------|-------------|
| C  | -3.83532100 | -0.73060800 | -0.26632600 |
| C  | -2.49506300 | -1.08387400 | -0.10391800 |
| C  | -1.49344500 | -0.14225900 | 0.25441800  |
| C  | -1.86862600 | 1.19442900  | 0.45148900  |
| C  | -3.19459100 | 1.56274900  | 0.29386300  |
| C  | -4.15004700 | 0.59889200  | -0.06093400 |
| C  | -0.24476900 | -0.85505700 | 0.33855500  |
| C  | -0.53287800 | -2.15994700 | 0.03174800  |
| N  | -1.87908800 | -2.30217400 | -0.23299800 |
| C  | 1.10403700  | -0.24958100 | 0.65968000  |
| C  | 1.92254200  | -1.12371600 | 1.65133900  |
| C  | 1.18857000  | -1.19780500 | 2.99917100  |
| C  | 3.35614700  | -0.63271700 | 1.87983700  |
| C  | 1.78671200  | 0.16868600  | -0.68839100 |
| C  | 2.21751400  | -0.98525900 | -1.60865400 |
| C  | 2.94069900  | 1.16012000  | -0.57764000 |
| O  | 2.73001200  | -1.99377600 | -1.17158900 |
| O  | 3.99820900  | 1.05567300  | -1.15940400 |
| O  | 2.61864200  | 2.20542600  | 0.19135000  |
| C  | 3.62196300  | 3.23728700  | 0.32718400  |
| C  | 1.95439400  | -0.79495600 | -3.07883400 |
| H  | -4.59125900 | -1.45538700 | -0.53763600 |
| H  | -1.13621500 | 1.94426900  | 0.72586000  |
| H  | -3.50086000 | 2.58936600  | 0.44237700  |
| H  | 0.11642900  | -3.01868200 | -0.01734100 |
| H  | -2.33255900 | -3.16962400 | -0.47025800 |
| H  | 0.91328200  | 0.69897500  | 1.17000600  |
| H  | 1.98596100  | -2.13277600 | 1.23984800  |
| H  | 1.13774000  | -0.20957200 | 3.46762600  |
| H  | 0.16944600  | -1.57141800 | 2.89086800  |
| H  | 1.71955000  | -1.86248300 | 3.68484900  |
| H  | 3.37286400  | 0.39430000  | 2.25565800  |
| H  | 3.84620500  | -1.26120800 | 2.62760700  |
| H  | 3.95887100  | -0.68190100 | 0.97291100  |
| H  | 1.02042400  | 0.73483600  | -1.22908600 |
| H  | 4.52612200  | 2.82489700  | 0.77201300  |
| H  | 3.85164700  | 3.66721400  | -0.64629900 |
| H  | 3.17970900  | 3.98313100  | 0.98088800  |
| H  | 2.41596200  | -1.59382400 | -3.65608600 |
| H  | 0.87287000  | -0.79778100 | -3.24863400 |
| H  | 2.32661300  | 0.17628300  | -3.41284400 |
| Cl | -5.83183200 | 1.11292300  | -0.25174800 |

Compound **1b**, optimization level PCM-B3LYP/6-311++G(2d,p)

## Conformation #2

|    |             |             |             |
|----|-------------|-------------|-------------|
| C  | -3.50957700 | -0.00470200 | 0.99758200  |
| C  | -2.13888300 | 0.21652900  | 1.13936600  |
| C  | -1.26244200 | 0.33921700  | 0.02854800  |
| C  | -1.79938900 | 0.22738300  | -1.26188600 |
| C  | -3.15722000 | 0.00633700  | -1.42202500 |
| C  | -3.98547800 | -0.10406000 | -0.29520200 |
| C  | 0.06446900  | 0.55480100  | 0.54897200  |
| C  | -0.06355900 | 0.54896700  | 1.91569000  |
| N  | -1.37942600 | 0.34987600  | 2.27337100  |
| C  | 1.32259900  | 0.74290600  | -0.26650800 |
| C  | 1.77819600  | 2.23203600  | -0.39404800 |
| C  | 2.10966000  | 2.91641100  | 0.93719000  |
| C  | 0.74476600  | 3.05456700  | -1.17266300 |
| C  | 2.47634600  | -0.16219800 | 0.23788400  |
| C  | 3.67797200  | -0.20203100 | -0.73531100 |
| C  | 2.04456500  | -1.60953900 | 0.47145800  |
| O  | 3.51977000  | -0.12447200 | -1.93427200 |
| O  | 2.29151000  | -2.23368100 | 1.47940200  |
| O  | 1.39767100  | -2.11788300 | -0.58009000 |
| C  | 0.95592700  | -3.48880900 | -0.46412100 |
| C  | 5.03618000  | -0.35656900 | -0.10660800 |
| H  | -4.16675200 | -0.09619800 | 1.85199300  |
| H  | -1.16765100 | 0.31164500  | -2.13765600 |
| H  | -3.58607900 | -0.08225400 | -2.41099800 |
| H  | 0.68422100  | 0.66558500  | 2.68323000  |
| H  | -1.71923100 | 0.29785800  | 3.22010300  |
| H  | 1.10482700  | 0.40733100  | -1.28196100 |
| H  | 2.69256800  | 2.21887700  | -0.99520200 |
| H  | 1.22295800  | 3.01070500  | 1.56814700  |
| H  | 2.87525600  | 2.38509300  | 1.50721800  |
| H  | 2.48950400  | 3.92358200  | 0.74942700  |
| H  | -0.20182100 | 3.11990900  | -0.63034300 |
| H  | 1.10918300  | 4.07271700  | -1.32966600 |
| H  | 0.54254400  | 2.61705400  | -2.15344400 |
| H  | 2.84307300  | 0.17451300  | 1.20658900  |
| H  | 1.81090000  | -4.14700200 | -0.31816100 |
| H  | 0.26436500  | -3.58972000 | 0.37065400  |
| H  | 0.45735600  | -3.71059900 | -1.40290700 |
| H  | 5.79329800  | -0.52846500 | -0.86906800 |
| H  | 5.27634300  | 0.55463600  | 0.45024000  |
| H  | 5.03314200  | -1.17518700 | 0.61752600  |
| Cl | -5.71402500 | -0.38461200 | -0.54585500 |

Compound **1b**, optimization level PCM-B3LYP/6-311++G(2d,p)

## Conformation #3

|    |             |             |             |
|----|-------------|-------------|-------------|
| C  | -3.89512800 | 0.41627700  | 0.66859000  |
| C  | -2.55994700 | 0.82179100  | 0.65449900  |
| C  | -1.58396500 | 0.21356400  | -0.17960800 |
| C  | -1.97994900 | -0.83685600 | -1.02006200 |
| C  | -3.30120400 | -1.25275200 | -1.01823700 |
| C  | -4.23111600 | -0.62248400 | -0.17801900 |
| C  | -0.33388900 | 0.88699700  | 0.06139300  |
| C  | -0.59612000 | 1.84376400  | 1.00783700  |
| N  | -1.92793000 | 1.80913600  | 1.36561100  |
| C  | 0.99392200  | 0.55327300  | -0.58092100 |
| C  | 1.77900700  | 1.82450700  | -1.01001600 |
| C  | 0.99086500  | 2.57634900  | -2.09382100 |
| C  | 3.19768600  | 1.54371600  | -1.51761800 |
| C  | 1.73449800  | -0.48966300 | 0.32291000  |
| C  | 2.24337400  | 0.03607900  | 1.67377000  |
| C  | 2.79366000  | -1.29118200 | -0.43282000 |
| O  | 2.79665300  | 1.11147600  | 1.77636800  |
| O  | 2.61600500  | -1.76052800 | -1.53221700 |
| O  | 3.91233200  | -1.47074600 | 0.28005700  |
| C  | 4.94469400  | -2.28032700 | -0.32885600 |
| C  | 1.98978100  | -0.84500100 | 2.86949600  |
| H  | -4.63112900 | 0.88766200  | 1.30614200  |
| H  | -1.26746800 | -1.32807800 | -1.67199600 |
| H  | -3.62346600 | -2.06104600 | -1.66057800 |
| H  | 0.06198000  | 2.56585900  | 1.46285300  |
| H  | -2.36270900 | 2.42392300  | 2.03442800  |
| H  | 0.77816000  | -0.00357500 | -1.49818900 |
| H  | 1.86900600  | 2.47598900  | -0.13849300 |
| H  | 0.90829400  | 1.97142200  | -3.00250800 |
| H  | -0.01807800 | 2.82940600  | -1.76534200 |
| H  | 1.50120400  | 3.50531700  | -2.35936500 |
| H  | 3.18926800  | 0.87355200  | -2.38107500 |
| H  | 3.66781700  | 2.47925500  | -1.83106100 |
| H  | 3.83325000  | 1.10852200  | -0.74548900 |
| H  | 0.98358600  | -1.25394700 | 0.55042800  |
| H  | 5.28136800  | -1.81998200 | -1.25608800 |
| H  | 5.75055500  | -2.31164300 | 0.39820400  |
| H  | 4.56624400  | -3.28147700 | -0.52769000 |
| H  | 0.91275600  | -0.87381300 | 3.06461800  |
| H  | 2.30372700  | -1.87159600 | 2.66826600  |
| H  | 2.50700600  | -0.45746600 | 3.74520400  |
| Cl | -5.90781100 | -1.18542300 | -0.20801800 |

Compound **1b**, optimization level PCM-B3LYP/6-311++G(2d,p)

Conformation #5

|    |             |             |             |
|----|-------------|-------------|-------------|
| C  | 3.54330700  | 0.34709200  | 0.90119800  |
| C  | 2.17485800  | 0.14627300  | 1.08689000  |
| C  | 1.31742700  | -0.30393600 | 0.04829800  |
| C  | 1.87116000  | -0.54984900 | -1.21621400 |
| C  | 3.22691700  | -0.35401500 | -1.41968600 |
| C  | 4.03652700  | 0.08721300  | -0.36238000 |
| C  | -0.01231700 | -0.39114600 | 0.59745400  |
| C  | 0.09484200  | 0.00470900  | 1.90749000  |
| N  | 1.40139500  | 0.32343700  | 2.20539900  |
| C  | -1.25572600 | -0.82915300 | -0.14134900 |
| C  | -1.68416600 | -2.30145300 | 0.14896000  |
| C  | -2.04872300 | -2.57947400 | 1.61160300  |
| C  | -0.61742400 | -3.28963000 | -0.33645900 |
| C  | -2.42466600 | 0.17153500  | 0.09665300  |
| C  | -3.71087200 | -0.19006800 | -0.67571000 |
| C  | -2.00480800 | 1.58692000  | -0.28483900 |
| O  | -4.74704900 | -0.34535800 | -0.06122500 |
| O  | -1.45654800 | 1.89183700  | -1.31947100 |
| O  | -2.35055400 | 2.46762100  | 0.66213400  |
| C  | -2.02879800 | 3.85253300  | 0.39738200  |
| C  | -3.64616100 | -0.33336800 | -2.17378000 |
| H  | 4.18579000  | 0.68903100  | 1.70150100  |
| H  | 1.25441300  | -0.89074500 | -2.03879200 |
| H  | 3.66859300  | -0.53879600 | -2.38951100 |
| H  | -0.66225000 | 0.09503200  | 2.66932200  |
| H  | 1.72637800  | 0.65191600  | 3.10039700  |
| H  | -1.02035500 | -0.78047900 | -1.20727100 |
| H  | -2.58353200 | -2.48672700 | -0.44938200 |
| H  | -2.40404600 | -3.60745000 | 1.71414600  |
| H  | -1.18149000 | -2.46320000 | 2.26537200  |
| H  | -2.84132500 | -1.92378400 | 1.97792400  |
| H  | 0.31156000  | -3.17894400 | 0.22800000  |
| H  | -0.96558500 | -4.31711800 | -0.20738100 |
| H  | -0.38875000 | -3.14460200 | -1.39519000 |
| H  | -2.71029600 | 0.18289600  | 1.14624100  |
| H  | -0.95298900 | 3.97051700  | 0.27937200  |
| H  | -2.53914400 | 4.19008600  | -0.50316800 |
| H  | -2.38133700 | 4.40036400  | 1.26609200  |
| H  | -3.15155100 | 0.52938600  | -2.62255300 |
| H  | -3.05175500 | -1.21113800 | -2.44057400 |
| H  | -4.65134600 | -0.44910400 | -2.57382400 |
| Cl | 5.76318800  | 0.32123000  | -0.66606300 |

Compound **1b**, optimization level PCM-B3LYP/6-311++G(2d,p)

## Conformation #7

|    |             |             |             |
|----|-------------|-------------|-------------|
| C  | -3.46499200 | -0.19170700 | 0.87940200  |
| C  | -2.12593800 | -0.44576500 | 1.17892400  |
| C  | -1.09451500 | -0.43813000 | 0.19817800  |
| C  | -1.45917000 | -0.15294700 | -1.12835100 |
| C  | -2.78218000 | 0.10613600  | -1.44370800 |
| C  | -3.76083700 | 0.08143800  | -0.44046600 |
| C  | 0.14282900  | -0.73543100 | 0.88831800  |
| C  | -0.19417900 | -0.89516900 | 2.20820100  |
| N  | -1.54650200 | -0.73240500 | 2.38800500  |
| C  | 1.56407900  | -0.85238800 | 0.38297700  |
| C  | 1.89767300  | -2.18972200 | -0.34676700 |
| C  | 1.11808500  | -2.43709700 | -1.64273600 |
| C  | 1.74688700  | -3.38091300 | 0.60641500  |
| C  | 1.97926600  | 0.40040700  | -0.45025800 |
| C  | 3.42923200  | 0.32672000  | -0.97269700 |
| C  | 1.80438400  | 1.66695700  | 0.37899500  |
| O  | 3.62485300  | 0.35360800  | -2.17135100 |
| O  | 2.24964900  | 1.83209000  | 1.49191100  |
| O  | 1.11076700  | 2.59534600  | -0.29069000 |
| C  | 0.89475000  | 3.85133000  | 0.39270300  |
| C  | 4.56500400  | 0.23745200  | 0.01239100  |
| H  | -4.23237000 | -0.20623900 | 1.64189100  |
| H  | -0.72517700 | -0.13489400 | -1.92201800 |
| H  | -3.06678400 | 0.32650100  | -2.46362600 |
| H  | 0.44433100  | -1.11376100 | 3.04954400  |
| H  | -2.02647500 | -0.79190300 | 3.27152000  |
| H  | 2.19325700  | -0.83838600 | 1.27672500  |
| H  | 2.95917000  | -2.13484500 | -0.61474900 |
| H  | 0.05131600  | -2.56204100 | -1.44744400 |
| H  | 1.24201200  | -1.62791600 | -2.36507600 |
| H  | 1.47569900  | -3.35335600 | -2.11859700 |
| H  | 0.70433900  | -3.52453800 | 0.89975200  |
| H  | 2.08807800  | -4.29879500 | 0.12192300  |
| H  | 2.33620200  | -3.24268100 | 1.51661900  |
| H  | 1.36049400  | 0.49540800  | -1.33842000 |
| H  | 0.33478000  | 3.68575100  | 1.31155500  |
| H  | 1.84935100  | 4.32265500  | 0.62078300  |
| H  | 0.32218200  | 4.46044600  | -0.30023400 |
| H  | 4.42171200  | -0.59243600 | 0.70684900  |
| H  | 5.50353400  | 0.11365700  | -0.52377800 |
| H  | 4.59900600  | 1.14635500  | 0.61713700  |
| Cl | -5.43844500 | 0.41426400  | -0.88849800 |



Compound **1b**, optimization level PCM-B3LYP/6-311++G(2d,p)

## Conformation #8

|    |             |             |             |
|----|-------------|-------------|-------------|
| C  | 3.48901900  | -0.08626300 | 0.85549000  |
| C  | 2.15465400  | 0.15560400  | 1.18513400  |
| C  | 1.13485600  | 0.34277500  | 0.21027500  |
| C  | 1.50522300  | 0.27056500  | -1.14275100 |
| C  | 2.82351000  | 0.02822300  | -1.48929100 |
| C  | 3.79134600  | -0.14376300 | -0.48971800 |
| C  | -0.10223300 | 0.55771300  | 0.93010600  |
| C  | 0.22349000  | 0.48572600  | 2.26041600  |
| N  | 1.56904700  | 0.25390400  | 2.42076400  |
| C  | -1.50979200 | 0.81429800  | 0.43759300  |
| C  | -1.77765800 | 2.28154100  | -0.02753400 |
| C  | -0.92390400 | 2.75913600  | -1.20761500 |
| C  | -1.65009200 | 3.25447600  | 1.15048000  |
| C  | -1.96954000 | -0.21929400 | -0.62563900 |
| C  | -3.48816900 | -0.14534500 | -0.91047400 |
| C  | -1.65794600 | -1.66213800 | -0.22757100 |
| O  | -4.28143300 | 0.13627100  | -0.03894300 |
| O  | -1.06315800 | -2.44503100 | -0.93385700 |
| O  | -2.14715300 | -1.96841400 | 0.97664500  |
| C  | -1.91161800 | -3.31517100 | 1.44368100  |
| C  | -3.91239100 | -0.45625700 | -2.32032300 |
| H  | 4.24792200  | -0.22352000 | 1.61425200  |
| H  | 0.77785900  | 0.40350700  | -1.93165700 |
| H  | 3.11292500  | -0.02869800 | -2.52988000 |
| H  | -0.41832200 | 0.58116400  | 3.12200300  |
| H  | 2.04017400  | 0.15353800  | 3.30530300  |
| H  | -2.16578300 | 0.65842300  | 1.29634100  |
| H  | -2.82385300 | 2.30922500  | -0.34715100 |
| H  | -1.23844000 | 3.76163300  | -1.50805500 |
| H  | 0.13369400  | 2.81116900  | -0.94138300 |
| H  | -1.02219200 | 2.11609800  | -2.08504700 |
| H  | -0.62273500 | 3.29900100  | 1.52023400  |
| H  | -1.93878300 | 4.26266900  | 0.84344100  |
| H  | -2.29447500 | 2.95980800  | 1.98284100  |
| H  | -1.44801400 | -0.07462400 | -1.56983600 |
| H  | -0.84189800 | -3.50308800 | 1.51996600  |
| H  | -2.37979900 | -3.36641500 | 2.42214600  |
| H  | -2.36559600 | -4.03320000 | 0.76257700  |
| H  | -3.55891000 | 0.34101900  | -2.98180000 |
| H  | -3.44578400 | -1.38160100 | -2.66754300 |
| H  | -4.99597600 | -0.53123600 | -2.38612700 |
| Cl | 5.46388700  | -0.44739800 | -0.97707700 |

Compound **1b**, optimization level PCM-B3LYP/6-311++G(2d,p)

Conformation #9

|    |             |             |             |
|----|-------------|-------------|-------------|
| C  | 3.52654600  | -0.12614400 | 0.98561900  |
| C  | 2.15444200  | -0.34023800 | 1.12413500  |
| C  | 1.26209600  | -0.33923500 | 0.01934700  |
| C  | 1.78436200  | -0.10770800 | -1.26120400 |
| C  | 3.14319500  | 0.10898000  | -1.41764500 |
| C  | 3.98752900  | 0.09474400  | -0.29742700 |
| C  | -0.06064800 | -0.58684800 | 0.53618200  |
| C  | 0.08488800  | -0.71789000 | 1.89497400  |
| N  | 1.40781600  | -0.57521200 | 2.25026000  |
| C  | -1.33353700 | -0.67479700 | -0.27330700 |
| C  | -1.81435700 | -2.13264400 | -0.55518300 |
| C  | -2.18103600 | -2.93358900 | 0.69898400  |
| C  | -0.78766700 | -2.89586700 | -1.39979500 |
| C  | -2.45801800 | 0.19136700  | 0.37139200  |
| C  | -3.78644300 | 0.14669800  | -0.41229800 |
| C  | -2.03216200 | 1.63896200  | 0.59377400  |
| O  | -4.78015900 | -0.28417500 | 0.13746300  |
| O  | -2.23834100 | 2.24375900  | 1.62220900  |
| O  | -1.43698800 | 2.17447700  | -0.47642000 |
| C  | -1.02125000 | 3.55412400  | -0.36097800 |
| C  | -3.83052000 | 0.65629600  | -1.82979900 |
| H  | 4.19585400  | -0.13083300 | 1.83541800  |
| H  | 1.14125800  | -0.09591100 | -2.13267000 |
| H  | 3.56071700  | 0.28920600  | -2.39896900 |
| H  | -0.65452000 | -0.89820200 | 2.65825600  |
| H  | 1.75999300  | -0.61646500 | 3.19304000  |
| H  | -1.11608000 | -0.23350400 | -1.24811600 |
| H  | -2.72225000 | -2.04517900 | -1.16366700 |
| H  | -1.30762600 | -3.09416400 | 1.33505500  |
| H  | -2.95286500 | -2.44508000 | 1.29694900  |
| H  | -2.56484200 | -3.91514800 | 0.41129500  |
| H  | 0.14700800  | -3.04062500 | -0.85272000 |
| H  | -1.17442900 | -3.88239600 | -1.66590600 |
| H  | -0.55762400 | -2.36587700 | -2.32735000 |
| H  | -2.70187500 | -0.18820400 | 1.36130800  |
| H  | -0.29505400 | 3.65899600  | 0.44321100  |
| H  | -0.57084000 | 3.79975100  | -1.31799000 |
| H  | -1.88322300 | 4.19026500  | -0.16672600 |
| H  | -4.76598400 | 0.35355500  | -2.29592000 |
| H  | -3.77251800 | 1.74821100  | -1.81903400 |
| H  | -2.98352800 | 0.30233800  | -2.41848400 |
| Cl | 5.71665200  | 0.37329400  | -0.54385000 |

Compound **1b**, optimization level PCM-B3LYP/6-311++G(2d,p)

## Conformation #14

|    |             |             |             |
|----|-------------|-------------|-------------|
| C  | -3.52135200 | -0.33541300 | 1.15791100  |
| C  | -2.14966700 | -0.07965900 | 1.18562500  |
| C  | -1.41377000 | 0.28835500  | 0.02755200  |
| C  | -2.09928000 | 0.40305600  | -1.19059000 |
| C  | -3.46111200 | 0.15530600  | -1.23662900 |
| C  | -4.14567400 | -0.20903900 | -0.06763600 |
| C  | -0.04137600 | 0.47115400  | 0.43013700  |
| C  | -0.00722900 | 0.21649100  | 1.77796500  |
| N  | -1.26539500 | -0.11346800 | 2.23310500  |
| C  | 1.08893800  | 0.90951500  | -0.47607300 |
| C  | 1.73048100  | 2.25889300  | -0.03842000 |
| C  | 0.67047900  | 3.36844800  | -0.01057100 |
| C  | 2.89391100  | 2.68450600  | -0.94418000 |
| C  | 2.14006200  | -0.20930900 | -0.77726300 |
| C  | 1.41494700  | -1.48050600 | -1.27187300 |
| C  | 3.14367600  | -0.49714400 | 0.32689000  |
| O  | 0.92738200  | -1.47024100 | -2.38319000 |
| O  | 3.02335200  | -0.24119700 | 1.50249300  |
| O  | 4.22971100  | -1.10053000 | -0.18670000 |
| C  | 5.26753600  | -1.46516700 | 0.75001100  |
| C  | 1.31981500  | -2.68050800 | -0.37041300 |
| H  | -4.07026800 | -0.61647900 | 2.04672900  |
| H  | -1.57842000 | 0.67956400  | -2.09918700 |
| H  | -4.00283600 | 0.23879300  | -2.16905600 |
| H  | 0.82851800  | 0.23806600  | 2.45571600  |
| H  | -1.49002000 | -0.35114100 | 3.18588500  |
| H  | 0.64015300  | 1.09390900  | -1.45709800 |
| H  | 2.11600900  | 2.13206100  | 0.97671100  |
| H  | 0.26906700  | 3.54836100  | -1.01293200 |
| H  | -0.16346400 | 3.11869600  | 0.64647200  |
| H  | 1.11016200  | 4.30370100  | 0.34376500  |
| H  | 2.57731000  | 2.74361700  | -1.99056100 |
| H  | 3.25188300  | 3.67439300  | -0.65218400 |
| H  | 3.74767600  | 2.00648200  | -0.88913700 |
| H  | 2.72368700  | 0.11228600  | -1.64085400 |
| H  | 4.87845600  | -2.16451500 | 1.48858600  |
| H  | 6.04397000  | -1.93293300 | 0.15204500  |
| H  | 5.65085900  | -0.57680400 | 1.24927000  |
| H  | 0.65596500  | -3.42336100 | -0.80764300 |
| H  | 2.31436700  | -3.11717100 | -0.24047600 |
| H  | 0.96256400  | -2.38745400 | 0.61883900  |
| Cl | -5.88433900 | -0.51905300 | -0.17247700 |

Compound **1b**, optimization level PCM-B3LYP/6-311++G(2d,p)

Conformation #15

|    |             |             |             |
|----|-------------|-------------|-------------|
| C  | -3.46056000 | -0.35742600 | 0.80230300  |
| C  | -2.13068700 | -0.67518100 | 1.08165100  |
| C  | -1.07390800 | -0.48769300 | 0.14649200  |
| C  | -1.40239300 | 0.04843700  | -1.10975900 |
| C  | -2.71586200 | 0.37285500  | -1.40381700 |
| C  | -3.72043900 | 0.16485500  | -0.44837600 |
| C  | 0.14516600  | -0.91903800 | 0.79585300  |
| C  | -0.22558900 | -1.32732600 | 2.05108100  |
| N  | -1.58266500 | -1.19299200 | 2.22640800  |
| C  | 1.57666600  | -0.94816200 | 0.30750900  |
| C  | 1.92163400  | -2.15738400 | -0.61864200 |
| C  | 1.11155100  | -2.23350400 | -1.91786500 |
| C  | 1.81662700  | -3.47845900 | 0.15223300  |
| C  | 2.02425100  | 0.40075000  | -0.31539500 |
| C  | 3.55198700  | 0.45899800  | -0.55382600 |
| C  | 1.69978700  | 1.57625000  | 0.60461200  |
| O  | 4.32685700  | -0.02027100 | 0.24492100  |
| O  | 1.95224400  | 1.61469500  | 1.78551000  |
| O  | 1.12975300  | 2.58317400  | -0.07135600 |
| C  | 0.81052300  | 3.76823400  | 0.69335600  |
| C  | 4.00759000  | 1.15377200  | -1.80786700 |
| H  | -4.24826500 | -0.50974400 | 1.52816900  |
| H  | -0.64610800 | 0.21315800  | -1.86482800 |
| H  | -2.97326800 | 0.78616600  | -2.36960300 |
| H  | 0.39118200  | -1.70552000 | 2.85095300  |
| H  | -2.08440500 | -1.41827400 | 3.07015400  |
| H  | 2.19871300  | -1.07203100 | 1.19665000  |
| H  | 2.97402700  | -2.03705400 | -0.89489800 |
| H  | 1.19599800  | -1.32612000 | -2.51986600 |
| H  | 1.47506600  | -3.06122900 | -2.53174000 |
| H  | 0.05272700  | -2.41063000 | -1.71832200 |
| H  | 0.78577300  | -3.68302400 | 0.45161900  |
| H  | 2.15488100  | -4.30990500 | -0.47094700 |
| H  | 2.43248000  | -3.46350900 | 1.05517800  |
| H  | 1.52918300  | 0.58756800  | -1.26613500 |
| H  | 1.71509300  | 4.18618900  | 1.13215700  |
| H  | 0.37412200  | 4.46140000  | -0.01951500 |
| H  | 0.09647400  | 3.52544700  | 1.47848400  |
| H  | 5.09044400  | 1.26095900  | -1.81358000 |
| H  | 3.69139100  | 0.56762300  | -2.67623400 |
| H  | 3.52862300  | 2.13202900  | -1.89842400 |
| Cl | -5.38496300 | 0.59098800  | -0.86670500 |

Compound **1b**, optimization level PCM-B3LYP/6-311++G(2d,p)

## Conformation #17

|    |             |             |             |
|----|-------------|-------------|-------------|
| C  | 3.20311100  | 0.13784300  | 1.18413200  |
| C  | 1.84855800  | 0.43387200  | 1.33794100  |
| C  | 0.94273000  | 0.51428700  | 0.24320800  |
| C  | 1.45250100  | 0.28870300  | -1.04576500 |
| C  | 2.79576300  | -0.00404300 | -1.21793200 |
| C  | 3.64563200  | -0.07596800 | -0.10612600 |
| C  | -0.35403200 | 0.84414200  | 0.79203300  |
| C  | -0.17214400 | 0.94671100  | 2.14623600  |
| N  | 1.13977600  | 0.70009500  | 2.48086300  |
| C  | -1.67946600 | 1.07897600  | 0.10006900  |
| C  | -1.58892500 | 2.05122400  | -1.11327700 |
| C  | -0.88562300 | 3.35450200  | -0.70784800 |
| C  | -2.96714600 | 2.38861200  | -1.70175100 |
| C  | -2.45253100 | -0.24264600 | -0.22392400 |
| C  | -3.16319700 | -0.85010000 | 0.99745800  |
| C  | -1.62659700 | -1.25148300 | -1.00558800 |
| O  | -3.19425200 | -0.27604600 | 2.06551000  |
| O  | -1.50190100 | -1.23231900 | -2.21049700 |
| O  | -1.03301400 | -2.15074200 | -0.21297100 |
| C  | -0.20989800 | -3.14592100 | -0.86201200 |
| C  | -3.90390000 | -2.15236200 | 0.79387900  |
| H  | 3.87412700  | 0.08088500  | 2.03077200  |
| H  | 0.81217400  | 0.33185300  | -1.91624700 |
| H  | 3.19405200  | -0.17915200 | -2.20819600 |
| H  | -0.89641200 | 1.17631100  | 2.91048800  |
| H  | 1.51447900  | 0.71569300  | 3.41555100  |
| H  | -2.31733800 | 1.57447700  | 0.83709200  |
| H  | -0.99854600 | 1.57939500  | -1.90372900 |
| H  | -0.82256800 | 4.03164200  | -1.56275000 |
| H  | -1.44581300 | 3.86611500  | 0.08141700  |
| H  | 0.12590100  | 3.18054800  | -0.34091000 |
| H  | -3.63757500 | 2.78163600  | -0.93084100 |
| H  | -2.86487800 | 3.15573500  | -2.47259400 |
| H  | -3.45512700 | 1.53279300  | -2.17094000 |
| H  | -3.27666500 | 0.00994200  | -0.89642300 |
| H  | 0.62327200  | -2.66489200 | -1.37110000 |
| H  | 0.14913500  | -3.78744100 | -0.06276100 |
| H  | -0.80371600 | -3.71538700 | -1.57511300 |
| H  | -4.77356500 | -2.17779000 | 1.44930600  |
| H  | -4.21144800 | -2.29767300 | -0.24253200 |
| H  | -3.24310700 | -2.97896000 | 1.06512900  |
| Cl | 5.35291100  | -0.45539000 | -0.37073000 |

Compound **1b**, optimization level PCM-B3LYP/6-311++G(2d,p)

## Conformation #20

|    |             |             |             |
|----|-------------|-------------|-------------|
| C  | 3.63523900  | 0.27849900  | 0.87974400  |
| C  | 2.25850100  | 0.16648600  | 1.07817400  |
| C  | 1.37710400  | -0.31315400 | 0.07345000  |
| C  | 1.91329600  | -0.68920100 | -1.16606700 |
| C  | 3.27795800  | -0.58556900 | -1.38047400 |
| C  | 4.11112300  | -0.10620300 | -0.35885900 |
| C  | 0.04430800  | -0.28313800 | 0.62038800  |
| C  | 0.17282300  | 0.19665000  | 1.89882500  |
| N  | 1.49676000  | 0.46791800  | 2.17752400  |
| C  | -1.19997200 | -0.75063500 | -0.09789100 |
| C  | -1.42031000 | -2.28277500 | 0.14676700  |
| C  | -2.37377500 | -2.94699200 | -0.85497100 |
| C  | -1.82102100 | -2.64093000 | 1.58296200  |
| C  | -2.43735500 | 0.13075400  | 0.22429400  |
| C  | -3.57949100 | -0.00156200 | -0.81244500 |
| C  | -2.11270600 | 1.62481800  | 0.28901800  |
| O  | -3.34482600 | -0.08892300 | -1.99740200 |
| O  | -2.46037900 | 2.34772900  | 1.19672500  |
| O  | -1.44824900 | 2.04803900  | -0.78781300 |
| C  | -1.10785100 | 3.45154400  | -0.82342000 |
| C  | -4.98081100 | 0.04256300  | -0.26454200 |
| H  | 4.29747900  | 0.64724200  | 1.65155900  |
| H  | 1.27594800  | -1.06007100 | -1.95981300 |
| H  | 3.70799600  | -0.87119400 | -2.33088300 |
| H  | -0.57721900 | 0.37895900  | 2.65115300  |
| H  | 1.83951300  | 0.84156600  | 3.04761000  |
| H  | -1.01705500 | -0.63096000 | -1.16816800 |
| H  | -0.43172900 | -2.72054600 | -0.02771500 |
| H  | -2.11900100 | -2.69424000 | -1.88587100 |
| H  | -3.41579700 | -2.66441200 | -0.68709700 |
| H  | -2.31881100 | -4.03335900 | -0.74861200 |
| H  | -1.14550900 | -2.20043400 | 2.31805100  |
| H  | -2.83884400 | -2.31718000 | 1.81725000  |
| H  | -1.79213900 | -3.72508600 | 1.71539900  |
| H  | -2.84074300 | -0.10662100 | 1.20733600  |
| H  | -2.01153500 | 4.05807700  | -0.79207300 |
| H  | -0.46496500 | 3.70187500  | 0.01898900  |
| H  | -0.58164300 | 3.59613300  | -1.76222500 |
| H  | -5.70741500 | 0.05371500  | -1.07442700 |
| H  | -5.15332600 | -0.82725000 | 0.37571700  |
| H  | -5.10780400 | 0.92560200  | 0.36784000  |
| Cl | 5.84768000  | 0.01006300  | -0.67520500 |

Compound **1b**, optimization level PCM-B3LYP/6-311++G(2d,p)

## Conformation #21

|    |             |             |             |
|----|-------------|-------------|-------------|
| C  | 3.54463900  | 0.44365300  | 0.89307700  |
| C  | 2.17755900  | 0.22620700  | 1.07081400  |
| C  | 1.34302000  | -0.29057200 | 0.04441700  |
| C  | 1.91845400  | -0.58613400 | -1.19955200 |
| C  | 3.27315600  | -0.37485200 | -1.39502200 |
| C  | 4.05982400  | 0.13204200  | -0.34992600 |
| C  | 0.00722400  | -0.37706600 | 0.57857900  |
| C  | 0.08888100  | 0.08361700  | 1.86897400  |
| N  | 1.38525300  | 0.44318600  | 2.16878700  |
| C  | -1.21691800 | -0.87599700 | -0.15353800 |
| C  | -1.60694600 | -2.34716700 | 0.19642400  |
| C  | -1.93079400 | -2.58607100 | 1.67587200  |
| C  | -0.52730200 | -3.32738500 | -0.27712100 |
| C  | -2.41597100 | 0.09104100  | 0.01653200  |
| C  | -3.60741500 | -0.26410400 | -0.90294700 |
| C  | -2.01981000 | 1.52334900  | -0.33787200 |
| O  | -3.42514400 | -0.68298800 | -2.02544300 |
| O  | -1.40981800 | 1.84113200  | -1.33132400 |
| O  | -2.46802900 | 2.39600400  | 0.57511700  |
| C  | -2.18431700 | 3.79109100  | 0.32015900  |
| C  | -4.98271100 | -0.04075200 | -0.33533400 |
| H  | 4.16993700  | 0.83641000  | 1.68365900  |
| H  | 1.31859800  | -0.97764800 | -2.01198200 |
| H  | 3.73143500  | -0.59759300 | -2.34905600 |
| H  | -0.68032500 | 0.19470200  | 2.61593600  |
| H  | 1.69195700  | 0.81721700  | 3.05220700  |
| H  | -0.98400500 | -0.86792100 | -1.22017500 |
| H  | -2.51082600 | -2.56812600 | -0.37967200 |
| H  | -1.04769100 | -2.44682000 | 2.30344600  |
| H  | -2.71634700 | -1.92491100 | 2.04870000  |
| H  | -2.27823600 | -3.61231900 | 1.81713500  |
| H  | 0.41226600  | -3.17390200 | 0.25953700  |
| H  | -0.84595900 | -4.35783700 | -0.10183300 |
| H  | -0.32799300 | -3.21632700 | -1.34584100 |
| H  | -2.77340000 | 0.10126700  | 1.04518800  |
| H  | -2.62645900 | 4.33101300  | 1.15210900  |
| H  | -1.10835600 | 3.95346100  | 0.28558300  |
| H  | -2.63542200 | 4.09932500  | -0.62161900 |
| H  | -5.74040500 | -0.18195200 | -1.10351700 |
| H  | -5.15238700 | -0.74849000 | 0.48206200  |
| H  | -5.06060500 | 0.96076800  | 0.09513000  |
| Cl | 5.78635000  | 0.38345800  | -0.64214800 |

Compound **1b**, optimization level PCM-B3LYP/6-311++G(2d,p)

Conformation #22

|    |             |             |             |
|----|-------------|-------------|-------------|
| C  | 3.26016900  | -0.84107200 | -0.91254900 |
| C  | 1.91141600  | -1.18924500 | -0.83596400 |
| C  | 0.99653900  | -0.55759000 | 0.05237200  |
| C  | 1.49199000  | 0.45336500  | 0.89133500  |
| C  | 2.82903700  | 0.81080300  | 0.83149700  |
| C  | 3.68772500  | 0.16283100  | -0.06661400 |
| C  | -0.29046700 | -1.18405100 | -0.15111200 |
| C  | -0.09453200 | -2.13611300 | -1.11751100 |
| N  | 1.21678100  | -2.14274400 | -1.53439000 |
| C  | -1.62263300 | -0.92722400 | 0.51967000  |
| C  | -1.54328400 | -0.83414000 | 2.07142500  |
| C  | -0.82219800 | -2.06189300 | 2.64623800  |
| C  | -2.92893800 | -0.71669400 | 2.72382000  |
| C  | -2.42284900 | 0.24538400  | -0.14130800 |
| C  | -3.14290500 | -0.17391200 | -1.43704200 |
| C  | -1.60946400 | 1.51109200  | -0.34885800 |
| O  | -3.20233300 | -1.33647700 | -1.77784400 |
| O  | -1.03601600 | 1.80951900  | -1.37159700 |
| O  | -1.59214300 | 2.27006400  | 0.75776500  |
| C  | -0.84521400 | 3.50533500  | 0.67613400  |
| C  | -3.84833000 | 0.90543700  | -2.22171300 |
| H  | 3.93813600  | -1.33227800 | -1.59783900 |
| H  | 0.84646200  | 0.96521100  | 1.59210800  |
| H  | 3.21608500  | 1.58903300  | 1.47523200  |
| H  | -0.80859500 | -2.81750200 | -1.55036000 |
| H  | 1.60130000  | -2.75837200 | -2.23250900 |
| H  | -2.23836400 | -1.80453300 | 0.30486800  |
| H  | -0.97172100 | 0.05549100  | 2.34919200  |
| H  | -1.36575400 | -2.97935200 | 2.39876100  |
| H  | 0.19337200  | -2.16120900 | 2.26285500  |
| H  | -0.76631300 | -1.99240900 | 3.73500100  |
| H  | -2.83443000 | -0.76938700 | 3.81075500  |
| H  | -3.43232400 | 0.22427200  | 2.49586300  |
| H  | -3.58192400 | -1.53656200 | 2.40824100  |
| H  | -3.24294600 | 0.51361600  | 0.53086100  |
| H  | -1.27863700 | 4.15264300  | -0.08462500 |
| H  | -0.93137500 | 3.95911400  | 1.65897800  |
| H  | 0.19690300  | 3.30154900  | 0.43630800  |
| H  | -4.63469500 | 0.45908100  | -2.82792400 |
| H  | -4.26592100 | 1.67403800  | -1.56868300 |
| H  | -3.12522800 | 1.39341700  | -2.87910300 |
| Cl | 5.38682700  | 0.65203700  | -0.11310400 |



Compound **1b**, optimization level PCM-B3LYP/6-311++G(2d,p)

## Conformation #23

|    |             |             |             |
|----|-------------|-------------|-------------|
| C  | -3.51567400 | 0.06772400  | 0.90398200  |
| C  | -2.15459500 | 0.27727300  | 1.13033800  |
| C  | -1.21507800 | 0.42072700  | 0.07452800  |
| C  | -1.67749100 | 0.35129700  | -1.24725100 |
| C  | -3.02525400 | 0.14521300  | -1.49075500 |
| C  | -3.91684700 | 0.00701800  | -0.41635200 |
| C  | 0.07761900  | 0.62054000  | 0.67545500  |
| C  | -0.12728000 | 0.59217500  | 2.03148300  |
| N  | -1.46188400 | 0.38613000  | 2.30902300  |
| C  | 1.38578800  | 0.85087800  | -0.04729700 |
| C  | 1.93299000  | 2.28257100  | 0.24679500  |
| C  | 0.92700300  | 3.34950800  | -0.20618900 |
| C  | 3.30182000  | 2.58231700  | -0.37627800 |
| C  | 2.43989000  | -0.25059600 | 0.28111500  |
| C  | 3.47249400  | -0.47671400 | -0.84685300 |
| C  | 1.81229500  | -1.61317400 | 0.57692400  |
| O  | 3.20334600  | -0.25587400 | -2.00702500 |
| O  | 1.94795300  | -2.21117300 | 1.62045700  |
| O  | 1.12560600  | -2.08334000 | -0.46794300 |
| C  | 0.47601800  | -3.36146700 | -0.29094200 |
| C  | 4.81113400  | -1.02267500 | -0.42093700 |
| H  | -4.22155500 | -0.04131200 | 1.71650800  |
| H  | -0.99487800 | 0.45485500  | -2.08202500 |
| H  | -3.39778500 | 0.08879400  | -2.50461300 |
| H  | 0.57712700  | 0.70245300  | 2.84052300  |
| H  | -1.85730500 | 0.31816500  | 3.23279300  |
| H  | 1.19349300  | 0.77979100  | -1.12027000 |
| H  | 2.04057900  | 2.36142900  | 1.33537800  |
| H  | 1.28899300  | 4.34701500  | 0.05364200  |
| H  | 0.79269900  | 3.31735400  | -1.29184700 |
| H  | -0.05010800 | 3.21436300  | 0.25856400  |
| H  | 3.27354500  | 2.49414900  | -1.46475300 |
| H  | 3.59946600  | 3.60461500  | -0.13113800 |
| H  | 4.09119700  | 1.92772500  | -0.00219100 |
| H  | 2.98056600  | 0.00544900  | 1.19350600  |
| H  | -0.25070000 | -3.30242100 | 0.51763500  |
| H  | -0.01908500 | -3.56604400 | -1.23545700 |
| H  | 1.21446300  | -4.13035400 | -0.06963600 |
| H  | 5.40892100  | -1.28315900 | -1.29200800 |
| H  | 5.33969800  | -0.27255300 | 0.17418900  |
| H  | 4.68197300  | -1.89734900 | 0.22173800  |
| Cl | -5.62955000 | -0.25638100 | -0.77318800 |

Compound **1b**, optimization level PCM-B3LYP/6-311++G(2d,p)

## Conformation #37

|    |             |             |             |
|----|-------------|-------------|-------------|
| C  | 3.56151700  | -0.61208400 | -1.08025400 |
| C  | 2.17866300  | -0.42784300 | -1.10164000 |
| C  | 1.47072200  | 0.20004400  | -0.04203600 |
| C  | 2.19828900  | 0.65805500  | 1.06618800  |
| C  | 3.57209600  | 0.48366300  | 1.10492700  |
| C  | 4.22732200  | -0.14601700 | 0.03683600  |
| C  | 0.07446500  | 0.21099500  | -0.40514100 |
| C  | 0.00162200  | -0.38952600 | -1.63695800 |
| N  | 1.25679500  | -0.77167500 | -2.05638600 |
| C  | -1.04097800 | 0.80883900  | 0.42450400  |
| C  | -1.55664500 | 2.17271100  | -0.12921200 |
| C  | -0.40429300 | 3.17286200  | -0.28727600 |
| C  | -2.65042500 | 2.78784500  | 0.75500900  |
| C  | -2.20635800 | -0.18538800 | 0.75043500  |
| C  | -1.69613200 | -1.56565800 | 1.19294400  |
| C  | -3.25035600 | -0.37460600 | -0.34062300 |
| O  | -2.00028600 | -2.57444600 | 0.58916700  |
| O  | -3.06303600 | -0.31786100 | -1.53345100 |
| O  | -4.44917500 | -0.63057500 | 0.20491100  |
| C  | -5.53075900 | -0.89195900 | -0.71577600 |
| C  | -0.82746300 | -1.61081600 | 2.42403300  |
| H  | 4.08826500  | -1.09290500 | -1.89370600 |
| H  | 1.70425600  | 1.15073100  | 1.89507000  |
| H  | 4.14541900  | 0.83141200  | 1.95356200  |
| H  | -0.86274000 | -0.57921200 | -2.24938200 |
| H  | 1.45518000  | -1.24964000 | -2.92050700 |
| H  | -0.60568100 | 1.03556400  | 1.40312900  |
| H  | -1.97755400 | 1.98621800  | -1.12094600 |
| H  | 0.05139100  | 3.40295600  | 0.68082900  |
| H  | 0.37755900  | 2.79463400  | -0.94653100 |
| H  | -0.77584900 | 4.10961900  | -0.70910900 |
| H  | -2.29367700 | 2.92504800  | 1.78096600  |
| H  | -2.93343400 | 3.77038800  | 0.37069400  |
| H  | -3.55944400 | 2.18498200  | 0.79354800  |
| H  | -2.73674900 | 0.21302400  | 1.61882100  |
| H  | -5.70243400 | -0.02379900 | -1.35023000 |
| H  | -5.29775900 | -1.75898900 | -1.33195600 |
| H  | -6.39878100 | -1.08735400 | -0.09305900 |
| H  | -0.74369900 | -2.63871800 | 2.77202900  |
| H  | 0.17133900  | -1.23905400 | 2.18210600  |
| H  | -1.23039600 | -0.97570700 | 3.21519100  |
| Cl | 5.98232200  | -0.34830100 | 0.12725900  |

Compound **1b**, optimization level PCM-B3LYP/6-311++G(2d,p)

## Conformation #44

|    |             |             |             |
|----|-------------|-------------|-------------|
| C  | -3.46783500 | -0.17480400 | 0.85791000  |
| C  | -2.12652100 | -0.40341000 | 1.16793100  |
| C  | -1.10755500 | -0.48244600 | 0.17870500  |
| C  | -1.47923200 | -0.32014200 | -1.16529900 |
| C  | -2.80596600 | -0.09377400 | -1.49176600 |
| C  | -3.77425400 | -0.02520100 | -0.47995000 |
| C  | 0.13669000  | -0.72019900 | 0.87303800  |
| C  | -0.17874600 | -0.77242900 | 2.20473000  |
| N  | -1.53012100 | -0.58549600 | 2.38947400  |
| C  | 1.52469000  | -0.91954000 | 0.311111400 |
| C  | 1.57538300  | -2.15663400 | -0.63853100 |
| C  | 1.14158200  | -3.42672600 | 0.10621700  |
| C  | 2.94036400  | -2.39748400 | -1.29514200 |
| C  | 2.08520400  | 0.36941600  | -0.37158900 |
| C  | 3.62712900  | 0.45745300  | -0.34462200 |
| C  | 1.60020800  | 1.63796500  | 0.33006600  |
| O  | 4.27387900  | -0.05169100 | 0.54363600  |
| O  | 1.89860100  | 1.95362000  | 1.45862800  |
| O  | 0.82189200  | 2.37757300  | -0.46935900 |
| C  | 0.30517900  | 3.60359200  | 0.09681200  |
| C  | 4.26740700  | 1.25513300  | -1.45188300 |
| H  | -4.22944800 | -0.11693800 | 1.62414100  |
| H  | -0.74478600 | -0.36270000 | -1.95920200 |
| H  | -3.10163900 | 0.03294700  | -2.52441000 |
| H  | 0.46938400  | -0.93326400 | 3.05172800  |
| H  | -1.99859800 | -0.57482000 | 3.28093000  |
| H  | 2.18764600  | -1.12142400 | 1.15659400  |
| H  | 0.85388200  | -1.97950700 | -1.44329600 |
| H  | 1.83069500  | -3.64724200 | 0.92762700  |
| H  | 0.13932400  | -3.33430200 | 0.52516400  |
| H  | 1.14723600  | -4.28348900 | -0.57157700 |
| H  | 2.88975300  | -3.28669800 | -1.92788200 |
| H  | 3.25349100  | -1.57304200 | -1.93843800 |
| H  | 3.72041400  | -2.56180100 | -0.54833900 |
| H  | 1.75343500  | 0.42790800  | -1.40868200 |
| H  | 1.12584500  | 4.26143800  | 0.37840500  |
| H  | -0.29397700 | 4.05289200  | -0.68950800 |
| H  | -0.30854700 | 3.38359700  | 0.96864900  |
| H  | 5.33750900  | 1.35101500  | -1.27981300 |
| H  | 4.09188100  | 0.76334100  | -2.41252500 |
| H  | 3.81077200  | 2.24636400  | -1.52024500 |
| Cl | -5.45651500 | 0.26668100  | -0.94149000 |

Compound **1b**, optimization level PCM-M06-2X/6-311++G(2d,p)

Conformation #1

|    |             |             |             |
|----|-------------|-------------|-------------|
| C  | -3.76833300 | -0.69207900 | -0.16125400 |
| C  | -2.43659500 | -1.09584700 | -0.05484900 |
| C  | -1.40980400 | -0.21805200 | 0.36015500  |
| C  | -1.73327700 | 1.10910700  | 0.67112100  |
| C  | -3.04495500 | 1.52611100  | 0.56822600  |
| C  | -4.03426400 | 0.62103200  | 0.15567200  |
| C  | -0.18229200 | -0.96643900 | 0.36205000  |
| C  | -0.50827700 | -2.22863800 | -0.04711500 |
| N  | -1.85932800 | -2.31246200 | -0.29662000 |
| C  | 1.18395600  | -0.39538400 | 0.64123800  |
| C  | 2.18208600  | -1.46607500 | 1.12557900  |
| C  | 1.73403000  | -2.00601800 | 2.48648000  |
| C  | 3.61681200  | -0.95214300 | 1.23947000  |
| C  | 1.59649900  | 0.41558300  | -0.62568100 |
| C  | 1.76325700  | -0.49272100 | -1.84236400 |
| C  | 2.79131300  | 1.33298500  | -0.46742900 |
| O  | 2.64868700  | -1.31309700 | -1.88639200 |
| O  | 3.66351600  | 1.48193900  | -1.28512400 |
| O  | 2.72293400  | 2.02742100  | 0.66761600  |
| C  | 3.80577500  | 2.93611200  | 0.90182000  |
| C  | 0.75766400  | -0.32391000 | -2.94337400 |
| H  | -4.55260800 | -1.36715600 | -0.47602800 |
| H  | -0.96958000 | 1.80716300  | 0.99483500  |
| H  | -3.32286100 | 2.54436500  | 0.80317200  |
| H  | 0.11794700  | -3.09636000 | -0.18227600 |
| H  | -2.34337500 | -3.14532300 | -0.59092200 |
| H  | 1.08554100  | 0.34487200  | 1.44276900  |
| H  | 2.18232300  | -2.28713500 | 0.40367600  |
| H  | 1.77093200  | -1.21001100 | 3.23583200  |
| H  | 0.71850300  | -2.40027200 | 2.46024500  |
| H  | 2.40196600  | -2.80419500 | 2.81444900  |
| H  | 3.66845900  | -0.08625000 | 1.90467000  |
| H  | 4.25233100  | -1.73344300 | 1.66030600  |
| H  | 4.03237800  | -0.68076000 | 0.26889100  |
| H  | 0.76497700  | 1.10051700  | -0.82493100 |
| H  | 4.74530000  | 2.38681000  | 0.94516000  |
| H  | 3.85185000  | 3.67862300  | 0.10762000  |
| H  | 3.59384300  | 3.40712100  | 1.85613800  |
| H  | 0.92403600  | -1.05366600 | -3.73175900 |
| H  | -0.24898400 | -0.42850900 | -2.52840400 |
| H  | 0.83513100  | 0.69052900  | -3.34405800 |
| Cl | -5.68561600 | 1.19579300  | 0.03939300  |

Compound **1b**, optimization level PCM-M06-2X/6-311++G(2d,p)

## Conformation #2

|    |             |             |             |
|----|-------------|-------------|-------------|
| C  | -3.47981700 | -0.15223200 | 1.00039100  |
| C  | -2.10633500 | 0.05146300  | 1.14308500  |
| C  | -1.25837100 | 0.31162200  | 0.04269400  |
| C  | -1.81224900 | 0.36055300  | -1.24273900 |
| C  | -3.16823200 | 0.15868100  | -1.40338900 |
| C  | -3.97437400 | -0.09098200 | -0.28266000 |
| C  | 0.07567400  | 0.46374900  | 0.55693200  |
| C  | -0.02017700 | 0.28606500  | 1.90967700  |
| N  | -1.32625200 | 0.04336700  | 2.26692600  |
| C  | 1.31144000  | 0.74623100  | -0.25359400 |
| C  | 1.69081800  | 2.24804700  | -0.29729800 |
| C  | 2.03426600  | 2.83712000  | 1.06951800  |
| C  | 0.57413800  | 3.05779000  | -0.95339700 |
| C  | 2.48484900  | -0.12319000 | 0.22350900  |
| C  | 3.68840700  | -0.07771600 | -0.73017200 |
| C  | 2.08996100  | -1.58599900 | 0.35778900  |
| O  | 3.54064900  | 0.12776600  | -1.90954700 |
| O  | 2.36788400  | -2.27817300 | 1.30434100  |
| O  | 1.42414300  | -2.02037900 | -0.70707400 |
| C  | 0.97874500  | -3.38144600 | -0.64860700 |
| C  | 5.02968400  | -0.32365200 | -0.10354900 |
| H  | -4.12444800 | -0.34921600 | 1.84639700  |
| H  | -1.19001600 | 0.55508100  | -2.10810800 |
| H  | -3.62074700 | 0.19056600  | -2.38501700 |
| H  | 0.74940500  | 0.30744200  | 2.66598600  |
| H  | -1.64820500 | -0.13008900 | 3.20532100  |
| H  | 1.10601500  | 0.44554300  | -1.28416400 |
| H  | 2.57606100  | 2.32537500  | -0.93556200 |
| H  | 1.17334200  | 2.78962300  | 1.74011900  |
| H  | 2.87168200  | 2.32775400  | 1.55025600  |
| H  | 2.31282600  | 3.88661300  | 0.95891400  |
| H  | -0.33312500 | 3.02949700  | -0.34470300 |
| H  | 0.87421700  | 4.10135100  | -1.06330700 |
| H  | 0.33072500  | 2.66827000  | -1.94438600 |
| H  | 2.82604800  | 0.16725500  | 1.21762000  |
| H  | 1.83156400  | -4.05053400 | -0.55169200 |
| H  | 0.30889400  | -3.51407600 | 0.19941800  |
| H  | 0.45476200  | -3.55966100 | -1.58183500 |
| H  | 5.79112100  | -0.45475000 | -0.86788000 |
| H  | 5.27908700  | 0.53466600  | 0.52637200  |
| H  | 4.98257900  | -1.19654700 | 0.55105400  |
| Cl | -5.69176400 | -0.33694500 | -0.53495300 |

Compound **1b**, optimization level PCM-M06-2X/6-311++G(2d,p)

## Conformation #3

|    |             |             |             |
|----|-------------|-------------|-------------|
| C  | -3.81552500 | 0.50555500  | 0.50178600  |
| C  | -2.49376600 | 0.95301200  | 0.48103800  |
| C  | -1.49029800 | 0.31752700  | -0.28482800 |
| C  | -1.82735300 | -0.80753500 | -1.04839600 |
| C  | -3.12933400 | -1.26574200 | -1.03685800 |
| C  | -4.09535600 | -0.60323400 | -0.26496200 |
| C  | -0.26728100 | 1.04375600  | -0.07417000 |
| C  | -0.57295000 | 2.05544700  | 0.79175500  |
| N  | -1.90719500 | 2.00703900  | 1.12645000  |
| C  | 1.08187500  | 0.65536700  | -0.62004500 |
| C  | 2.04867600  | 1.85316100  | -0.70862600 |
| C  | 1.53081800  | 2.85440500  | -1.74483300 |
| C  | 3.48044400  | 1.45733400  | -1.06742000 |
| C  | 1.57354000  | -0.56573100 | 0.21194300  |
| C  | 1.83968200  | -0.18870900 | 1.66850100  |
| C  | 2.70204100  | -1.32559200 | -0.45695200 |
| O  | 2.71016300  | 0.59445900  | 1.96606500  |
| O  | 2.71330000  | -1.58715700 | -1.63263800 |
| O  | 3.63640700  | -1.73672400 | 0.39702700  |
| C  | 4.70645500  | -2.49886200 | -0.17739000 |
| C  | 0.93080700  | -0.81320300 | 2.68689300  |
| H  | -4.58175400 | 0.99651100  | 1.08657800  |
| H  | -1.08190800 | -1.31665000 | -1.64873500 |
| H  | -3.41744500 | -2.13130100 | -1.61739800 |
| H  | 0.05694800  | 2.82714300  | 1.20521900  |
| H  | -2.37579900 | 2.66035000  | 1.73301700  |
| H  | 0.94493900  | 0.26815700  | -1.63647700 |
| H  | 2.07799700  | 2.34257900  | 0.26846200  |
| H  | 1.53372100  | 2.39970300  | -2.73958700 |
| H  | 0.51587100  | 3.18567700  | -1.52627900 |
| H  | 2.17714500  | 3.73307900  | -1.77741400 |
| H  | 3.51032100  | 0.92284300  | -2.01969300 |
| H  | 4.09273300  | 2.35569900  | -1.16570900 |
| H  | 3.93713700  | 0.83384800  | -0.29752100 |
| H  | 0.74882700  | -1.28644000 | 0.20281600  |
| H  | 5.22765400  | -1.89933300 | -0.92194200 |
| H  | 5.36716200  | -2.74524700 | 0.64718300  |
| H  | 4.31539000  | -3.40207900 | -0.64162400 |
| H  | -0.10609200 | -0.57880000 | 2.42797400  |
| H  | 1.03396200  | -1.90054800 | 2.64142000  |
| H  | 1.16521900  | -0.45266100 | 3.68520800  |
| Cl | -5.73444000 | -1.22283400 | -0.28111100 |

Compound **1b**, optimization level PCM-M06-2X/6-311++G(2d,p)

## Conformation #5

|    |             |             |             |
|----|-------------|-------------|-------------|
| C  | 3.53559400  | 0.39646500  | 0.90354500  |
| C  | 2.16317500  | 0.21094200  | 1.07711900  |
| C  | 1.32464000  | -0.27145900 | 0.04693900  |
| C  | 1.88807300  | -0.57124200 | -1.19994400 |
| C  | 3.24326700  | -0.39293800 | -1.39029100 |
| C  | 4.03971800  | 0.08423700  | -0.33837300 |
| C  | -0.01111700 | -0.33002400 | 0.57625000  |
| C  | 0.07482000  | 0.11449200  | 1.86716200  |
| N  | 1.37602400  | 0.43525900  | 2.17331900  |
| C  | -1.23587100 | -0.78887100 | -0.16755800 |
| C  | -1.60215200 | -2.27124500 | 0.08309700  |
| C  | -2.03347500 | -2.55195700 | 1.52074300  |
| C  | -0.44715600 | -3.18531500 | -0.31913600 |
| C  | -2.41871500 | 0.15923500  | 0.13364400  |
| C  | -3.70835900 | -0.30472800 | -0.55112800 |
| C  | -2.05976000 | 1.56193300  | -0.31731300 |
| O  | -4.65140100 | -0.64190700 | 0.12524700  |
| O  | -1.54821200 | 1.82788100  | -1.37542400 |
| O  | -2.39419400 | 2.47464900  | 0.59141300  |
| C  | -2.09725600 | 3.83356900  | 0.24074200  |
| C  | -3.74879800 | -0.33704600 | -2.05335500 |
| H  | 4.17187200  | 0.76565700  | 1.69653100  |
| H  | 1.27460900  | -0.93900800 | -2.01370800 |
| H  | 3.70277200  | -0.61650900 | -2.34329500 |
| H  | -0.69658200 | 0.23555100  | 2.61173700  |
| H  | 1.69094600  | 0.79402200  | 3.06022200  |
| H  | -1.01477200 | -0.68671400 | -1.23432400 |
| H  | -2.44909300 | -2.50308400 | -0.57399100 |
| H  | -2.28008100 | -3.60908500 | 1.63332800  |
| H  | -1.22432000 | -2.32234400 | 2.21787700  |
| H  | -2.91392600 | -1.97424700 | 1.80711000  |
| H  | 0.41712600  | -3.02302200 | 0.32933800  |
| H  | -0.74399800 | -4.23174400 | -0.23198100 |
| H  | -0.13645500 | -3.00490500 | -1.35056600 |
| H  | -2.63480400 | 0.18500600  | 1.20035200  |
| H  | -1.02631700 | 3.95035900  | 0.08573600  |
| H  | -2.63182000 | 4.10942600  | -0.66618900 |
| H  | -2.43107700 | 4.43344800  | 1.08081500  |
| H  | -3.67206300 | 0.68132400  | -2.43942500 |
| H  | -2.89675700 | -0.89071500 | -2.45109800 |
| H  | -4.67961900 | -0.79160600 | -2.38207400 |
| Cl | 5.75605100  | 0.29236000  | -0.62660900 |

Compound **1b**, optimization level PCM-M06-2X/6-311++G(2d,p)

## Conformation #7

|    |             |             |             |
|----|-------------|-------------|-------------|
| C  | -3.41482300 | -0.13825800 | 0.87438300  |
| C  | -2.07354800 | -0.34627000 | 1.19951100  |
| C  | -1.04617500 | -0.42964800 | 0.22793600  |
| C  | -1.40656600 | -0.29173500 | -1.12255200 |
| C  | -2.72681300 | -0.08098600 | -1.46280500 |
| C  | -3.70670300 | -0.00867100 | -0.46278100 |
| C  | 0.19002900  | -0.63575100 | 0.94723500  |
| C  | -0.14520000 | -0.65870600 | 2.27214700  |
| N  | -1.49695200 | -0.49636400 | 2.43065300  |
| C  | 1.60471900  | -0.76600000 | 0.44765700  |
| C  | 1.95942700  | -2.14468400 | -0.15385800 |
| C  | 1.20296800  | -2.47575900 | -1.43779600 |
| C  | 1.75650500  | -3.24498400 | 0.88487800  |
| C  | 1.94615000  | 0.40551600  | -0.51247200 |
| C  | 3.36291300  | 0.27224600  | -1.07373100 |
| C  | 1.76797700  | 1.70477100  | 0.24563800  |
| O  | 3.50947900  | 0.07629400  | -2.25794800 |
| O  | 2.34728100  | 1.98228900  | 1.26566200  |
| O  | 0.87904800  | 2.50300500  | -0.33913700 |
| C  | 0.61178600  | 3.73508300  | 0.34424100  |
| C  | 4.53153600  | 0.36907500  | -0.13363400 |
| H  | -4.18513500 | -0.07953500 | 1.63164400  |
| H  | -0.66976900 | -0.35764300 | -1.91177800 |
| H  | -3.01698600 | 0.02652200  | -2.49898000 |
| H  | 0.49760700  | -0.77919100 | 3.13048100  |
| H  | -1.98130800 | -0.46908700 | 3.31339600  |
| H  | 2.24510700  | -0.63660100 | 1.32550300  |
| H  | 3.02922400  | -2.11474000 | -0.39344700 |
| H  | 0.13209300  | -2.56308600 | -1.24260800 |
| H  | 1.35816500  | -1.72289300 | -2.21323000 |
| H  | 1.54787300  | -3.43272100 | -1.83346400 |
| H  | 0.69670000  | -3.35799800 | 1.12348300  |
| H  | 2.12228900  | -4.19932000 | 0.50247000  |
| H  | 2.28994000  | -3.02038500 | 1.81138000  |
| H  | 1.27830300  | 0.41227100  | -1.37011500 |
| H  | 0.22938400  | 3.52905200  | 1.34244100  |
| H  | 1.52166300  | 4.32799500  | 0.41463800  |
| H  | -0.13453600 | 4.24699800  | -0.25413500 |
| H  | 4.36848100  | -0.23286700 | 0.76087900  |
| H  | 5.43522500  | 0.05203900  | -0.64784200 |
| H  | 4.63504700  | 1.40425100  | 0.19744400  |
| Cl | -5.37013300 | 0.25631400  | -0.94443100 |



Compound **1b**, optimization level PCM-M06-2X/6-311++G(2d,p)

## Conformation #8

|    |             |             |             |
|----|-------------|-------------|-------------|
| C  | 3.42637100  | 0.04187700  | 0.84951600  |
| C  | 2.09289500  | 0.31185100  | 1.16205500  |
| C  | 1.07258000  | 0.39250300  | 0.18349100  |
| C  | 1.42756100  | 0.18395700  | -1.15847700 |
| C  | 2.73958100  | -0.08779300 | -1.48648000 |
| C  | 3.71459400  | -0.15302300 | -0.48058800 |
| C  | -0.15855000 | 0.67355700  | 0.88378500  |
| C  | 0.17136400  | 0.73920400  | 2.20834400  |
| N  | 1.51657700  | 0.53351600  | 2.38230400  |
| C  | -1.56024700 | 0.84960200  | 0.35986000  |
| C  | -1.84186500 | 2.25175200  | -0.23457700 |
| C  | -0.95995800 | 2.61437600  | -1.42790000 |
| C  | -1.71949200 | 3.31961700  | 0.85023100  |
| C  | -1.95282900 | -0.27044200 | -0.62045900 |
| C  | -3.46748900 | -0.33552100 | -0.86739600 |
| C  | -1.52156200 | -1.63488300 | -0.10681000 |
| O  | -4.25473000 | 0.11709000  | -0.07392400 |
| O  | -0.82762900 | -2.40675900 | -0.71748300 |
| O  | -2.01696800 | -1.88053500 | 1.10312600  |
| C  | -1.60760000 | -3.11662200 | 1.70155900  |
| C  | -3.89029900 | -1.00441700 | -2.14381300 |
| H  | 4.19356700  | -0.01402100 | 1.61014000  |
| H  | 0.69012000  | 0.23559600  | -1.94840600 |
| H  | 3.02748300  | -0.25156500 | -2.51590200 |
| H  | -0.47010000 | 0.91845800  | 3.05741900  |
| H  | 1.99528600  | 0.52404200  | 3.26841700  |
| H  | -2.22958300 | 0.74133000  | 1.21705500  |
| H  | -2.88286300 | 2.23990400  | -0.57109500 |
| H  | -1.24246900 | 3.59749100  | -1.80902100 |
| H  | 0.09152800  | 2.65911800  | -1.13590500 |
| H  | -1.05842100 | 1.90696300  | -2.25370600 |
| H  | -0.68663200 | 3.40055300  | 1.19700800  |
| H  | -2.02292400 | 4.29344200  | 0.46197400  |
| H  | -2.34862800 | 3.08418300  | 1.71157400  |
| H  | -1.46155000 | -0.16217000 | -1.58718800 |
| H  | -0.52462800 | -3.12917900 | 1.81520300  |
| H  | -2.09469600 | -3.15062400 | 2.67048900  |
| H  | -1.92220300 | -3.95493500 | 1.08304700  |
| H  | -3.61847700 | -0.35412800 | -2.97968700 |
| H  | -3.34739700 | -1.94213200 | -2.27972900 |
| H  | -4.96316400 | -1.17779600 | -2.14606700 |
| Cl | 5.36847100  | -0.49947500 | -0.94526800 |

Compound **1b**, optimization level PCM-M06-2X/6-311++G(2d,p)

## Conformation #9

|    |             |             |             |
|----|-------------|-------------|-------------|
| C  | 3.50699100  | -0.06090300 | 0.99814300  |
| C  | 2.13228200  | -0.25781400 | 1.13818700  |
| C  | 1.25622900  | -0.31742200 | 0.03082500  |
| C  | 1.78299200  | -0.16828000 | -1.25837600 |
| C  | 3.13987100  | 0.02897700  | -1.41593800 |
| C  | 3.97424200  | 0.07709100  | -0.28907100 |
| C  | -0.07003200 | -0.52415500 | 0.54656900  |
| C  | 0.05760000  | -0.57187200 | 1.90769800  |
| N  | 1.37554100  | -0.41783300 | 2.26673600  |
| C  | -1.32572600 | -0.64838000 | -0.27227700 |
| C  | -1.75928400 | -2.10922200 | -0.54272300 |
| C  | -2.18885600 | -2.85898300 | 0.71602500  |
| C  | -0.65073300 | -2.86902000 | -1.26759700 |
| C  | -2.45938400 | 0.17967900  | 0.37728600  |
| C  | -3.77072900 | 0.05661100  | -0.40442800 |
| C  | -2.06070900 | 1.63474100  | 0.54038500  |
| O  | -4.71574000 | -0.49733300 | 0.10592600  |
| O  | -2.28618000 | 2.28248100  | 1.53110400  |
| O  | -1.44976200 | 2.12374100  | -0.53606500 |
| C  | -1.04568600 | 3.49668100  | -0.45264000 |
| C  | -3.83598900 | 0.62565100  | -1.79456300 |
| H  | 4.17262600  | -0.01678900 | 1.84955100  |
| H  | 1.14028800  | -0.20554400 | -2.12985100 |
| H  | 3.57173100  | 0.14735100  | -2.40022000 |
| H  | -0.69491100 | -0.70044700 | 2.67010000  |
| H  | 1.72034000  | -0.40737300 | 3.21308300  |
| H  | -1.11277200 | -0.19895600 | -1.24581500 |
| H  | -2.62176700 | -2.06063800 | -1.21871800 |
| H  | -1.36483200 | -2.91462100 | 1.43123600  |
| H  | -3.04363900 | -2.38925000 | 1.20526000  |
| H  | -2.47517000 | -3.88015100 | 0.45859400  |
| H  | 0.22521800  | -2.97978000 | -0.62390900 |
| H  | -0.99415600 | -3.86650200 | -1.54644600 |
| H  | -0.34012500 | -2.34971200 | -2.17694900 |
| H  | -2.67364100 | -0.18545600 | 1.38050800  |
| H  | -0.34491800 | 3.62641400  | 0.37005100  |
| H  | -0.56894600 | 3.72090600  | -1.40118300 |
| H  | -1.91530100 | 4.13283100  | -0.29842700 |
| H  | -4.74758900 | 0.29027400  | -2.28221200 |
| H  | -3.83391100 | 1.71668500  | -1.73190500 |
| H  | -2.96127400 | 0.33972200  | -2.37973000 |
| Cl | 5.69111400  | 0.32673400  | -0.53899500 |

Compound **1b**, optimization level PCM-M06-2X/6-311++G(2d,p)

## Conformation #14

|    |             |             |             |
|----|-------------|-------------|-------------|
| C  | -3.41207600 | -0.02174100 | 1.18825700  |
| C  | -2.05092100 | 0.28825000  | 1.18737000  |
| C  | -1.30350300 | 0.43396300  | -0.00415600 |
| C  | -1.95212500 | 0.25934100  | -1.23431400 |
| C  | -3.29785500 | -0.04581100 | -1.25231600 |
| C  | -4.00060200 | -0.18119100 | -0.04542000 |
| C  | 0.04735300  | 0.75175800  | 0.37571700  |
| C  | 0.05816100  | 0.78487800  | 1.74183100  |
| N  | -1.19626600 | 0.50765400  | 2.23249400  |
| C  | 1.19742000  | 0.97367900  | -0.57199400 |
| C  | 2.05324600  | 2.20169700  | -0.19327400 |
| C  | 1.21557900  | 3.47175800  | -0.34211300 |
| C  | 3.31720000  | 2.31163400  | -1.04465700 |
| C  | 2.02859100  | -0.31417400 | -0.80884900 |
| C  | 1.07530700  | -1.45647700 | -1.18400200 |
| C  | 2.93925400  | -0.70161700 | 0.33504200  |
| O  | 0.62036000  | -1.48743900 | -2.30264100 |
| O  | 2.89785800  | -0.27598100 | 1.46021300  |
| O  | 3.82322100  | -1.61992500 | -0.06768100 |
| C  | 4.71322000  | -2.11050600 | 0.94304500  |
| C  | 0.70814400  | -2.46547300 | -0.13365000 |
| H  | -3.97758400 | -0.13208700 | 2.10376700  |
| H  | -1.40700200 | 0.35089700  | -2.16598100 |
| H  | -3.82103000 | -0.18583200 | -2.18829700 |
| H  | 0.87653200  | 0.97441100  | 2.41627200  |
| H  | -1.44335300 | 0.48329500  | 3.20870000  |
| H  | 0.76235900  | 1.18732500  | -1.55598400 |
| H  | 2.35027000  | 2.09828000  | 0.85316100  |
| H  | 0.94446800  | 3.62447000  | -1.39080100 |
| H  | 0.29658100  | 3.41715700  | 0.24276700  |
| H  | 1.78069700  | 4.34446600  | -0.01088500 |
| H  | 3.06715000  | 2.30014500  | -2.10997200 |
| H  | 3.83083100  | 3.25055000  | -0.83237900 |
| H  | 4.02473600  | 1.50238300  | -0.85290600 |
| H  | 2.66116500  | -0.16882600 | -1.68624700 |
| H  | 4.14362900  | -2.58020400 | 1.74349100  |
| H  | 5.34926000  | -2.83713800 | 0.44842500  |
| H  | 5.30645800  | -1.29240300 | 1.34693900  |
| H  | -0.10942900 | -3.08895700 | -0.48642200 |
| H  | 1.57969500  | -3.08954800 | 0.08223300  |
| H  | 0.43183800  | -1.95289200 | 0.79067500  |
| Cl | -5.70725100 | -0.57482900 | -0.12013200 |

Compound **1b**, optimization level PCM-M06-2X/6-311++G(2d,p)

## Conformation #15

|    |             |             |             |
|----|-------------|-------------|-------------|
| C  | -3.36365900 | -0.48478400 | 0.77896000  |
| C  | -2.02684900 | -0.79064700 | 1.04142500  |
| C  | -0.98042100 | -0.52398500 | 0.12531400  |
| C  | -1.31277700 | 0.07633500  | -1.09931200 |
| C  | -2.62754100 | 0.38860400  | -1.37551800 |
| C  | -3.62830500 | 0.10352900  | -0.43507000 |
| C  | 0.24525300  | -0.96470200 | 0.74871900  |
| C  | -0.11370900 | -1.45615700 | 1.97214600  |
| N  | -1.47071100 | -1.36414500 | 2.15126500  |
| C  | 1.66734500  | -0.91498000 | 0.25291500  |
| C  | 2.03535300  | -2.06028400 | -0.72223300 |
| C  | 1.18809900  | -2.09025400 | -1.99308800 |
| C  | 1.95863000  | -3.40853400 | -0.00932300 |
| C  | 2.03392000  | 0.46125900  | -0.33200900 |
| C  | 3.54967500  | 0.65583500  | -0.47211900 |
| C  | 1.54755400  | 1.56608500  | 0.59168500  |
| O  | 4.32950500  | 0.01823600  | 0.19062300  |
| O  | 1.88322100  | 1.67219900  | 1.74341400  |
| O  | 0.71157200  | 2.40131600  | -0.01815700 |
| C  | 0.15191800  | 3.43008900  | 0.80911800  |
| C  | 3.98367800  | 1.69684800  | -1.46405000 |
| H  | -4.15085500 | -0.69592400 | 1.49040400  |
| H  | -0.55441500 | 0.30040400  | -1.83754300 |
| H  | -2.89834100 | 0.85214800  | -2.31426100 |
| H  | 0.51439300  | -1.86916000 | 2.74627800  |
| H  | -1.97018100 | -1.65153400 | 2.97728700  |
| H  | 2.30742900  | -1.03851800 | 1.13059700  |
| H  | 3.07816900  | -1.89725000 | -1.01061300 |
| H  | 1.25362300  | -1.16153600 | -2.56342200 |
| H  | 1.53003400  | -2.89589300 | -2.64543800 |
| H  | 0.13791300  | -2.27492600 | -1.75631800 |
| H  | 0.92820400  | -3.63811900 | 0.27187500  |
| H  | 2.31602400  | -4.20602100 | -0.66313000 |
| H  | 2.56670800  | -3.41258100 | 0.89805300  |
| H  | 1.58104000  | 0.62717700  | -1.30930500 |
| H  | 0.94357400  | 4.05750600  | 1.21406600  |
| H  | -0.50133400 | 4.00530800  | 0.16131000  |
| H  | -0.41366700 | 2.97931700  | 1.62311900  |
| H  | 5.04662900  | 1.89979800  | -1.36398500 |
| H  | 3.76996200  | 1.32603000  | -2.47001000 |
| H  | 3.40335300  | 2.61277400  | -1.33211400 |
| Cl | -5.28450900 | 0.51708500  | -0.83165200 |

Compound **1b**, optimization level PCM-M06-2X/6-311++G(2d,p)

## Conformation #17

|    |             |             |             |
|----|-------------|-------------|-------------|
| C  | 3.14032100  | 0.25579300  | 1.17238300  |
| C  | 1.78602200  | 0.55317200  | 1.32466500  |
| C  | 0.86752800  | 0.54254600  | 0.24587400  |
| C  | 1.35383900  | 0.21959100  | -1.03047600 |
| C  | 2.69258400  | -0.07466800 | -1.20059100 |
| C  | 3.56036100  | -0.05212200 | -0.10113600 |
| C  | -0.42202400 | 0.89424600  | 0.79171400  |
| C  | -0.22308000 | 1.09543300  | 2.12685100  |
| N  | 1.09511400  | 0.89298400  | 2.45489500  |
| C  | -1.74370100 | 1.06127400  | 0.08774600  |
| C  | -1.64067900 | 1.94077900  | -1.17905100 |
| C  | -1.03425800 | 3.29736700  | -0.81868000 |
| C  | -3.00045900 | 2.14516500  | -1.84888500 |
| C  | -2.44972200 | -0.29501000 | -0.16226800 |
| C  | -2.97978500 | -0.93940400 | 1.11852200  |
| C  | -1.59442100 | -1.22756600 | -0.99145100 |
| O  | -3.00436400 | -0.33098600 | 2.16115200  |
| O  | -1.51986900 | -1.17774800 | -2.19464000 |
| O  | -0.90131100 | -2.08437700 | -0.24578600 |
| C  | -0.04349500 | -2.98644500 | -0.95731600 |
| C  | -3.55091000 | -2.33155400 | 1.01178400  |
| H  | 3.82668800  | 0.26612100  | 2.00836800  |
| H  | 0.69594800  | 0.17941500  | -1.88887900 |
| H  | 3.08025800  | -0.32732300 | -2.17815100 |
| H  | -0.94283400 | 1.36751800  | 2.88207600  |
| H  | 1.48653000  | 0.97654100  | 3.37904500  |
| H  | -2.40476300 | 1.58981300  | 0.78185600  |
| H  | -0.98326700 | 1.45124700  | -1.90159000 |
| H  | -0.96750700 | 3.93100700  | -1.70435900 |
| H  | -1.66373600 | 3.80907500  | -0.08417000 |
| H  | -0.03483800 | 3.19573400  | -0.39477100 |
| H  | -3.74309200 | 2.48399000  | -1.12007400 |
| H  | -2.92331900 | 2.90779300  | -2.62537100 |
| H  | -3.37214300 | 1.23674800  | -2.32385200 |
| H  | -3.34691700 | -0.11714300 | -0.76299800 |
| H  | 0.71015000  | -2.42459200 | -1.50616900 |
| H  | 0.42062500  | -3.60907600 | -0.19929800 |
| H  | -0.63107000 | -3.59100900 | -1.64597700 |
| H  | -4.41143800 | -2.41492000 | 1.67281000  |
| H  | -3.83296500 | -2.58166700 | -0.01078500 |
| H  | -2.78942700 | -3.04190600 | 1.33762600  |
| Cl | 5.25040900  | -0.43440800 | -0.36491400 |

Compound **1b**, optimization level PCM-M06-2X/6-311++G(2d,p)

## Conformation #20

|    |             |             |             |
|----|-------------|-------------|-------------|
| C  | 3.63238500  | 0.50306800  | 0.80366700  |
| C  | 2.24966200  | 0.43093100  | 0.97974100  |
| C  | 1.40368300  | -0.23825000 | 0.06671000  |
| C  | 1.96769400  | -0.85458500 | -1.05723100 |
| C  | 3.33372100  | -0.79428200 | -1.24650200 |
| C  | 4.13737300  | -0.11945800 | -0.31557100 |
| C  | 0.05783800  | -0.10457100 | 0.55388400  |
| C  | 0.14504900  | 0.61630400  | 1.71156500  |
| N  | 1.45813200  | 0.94107100  | 1.97163800  |
| C  | -1.15608400 | -0.70897500 | -0.09630800 |
| C  | -1.24437400 | -2.22149800 | 0.24655300  |
| C  | -2.24642300 | -2.98820600 | -0.61583600 |
| C  | -1.50936000 | -2.49226700 | 1.72690400  |
| C  | -2.43426800 | 0.07458700  | 0.25029100  |
| C  | -3.61111800 | -0.23634500 | -0.69130200 |
| C  | -2.23339300 | 1.58045500  | 0.15011400  |
| O  | -3.43515400 | -0.38125700 | -1.87506200 |
| O  | -2.61119200 | 2.36483700  | 0.98443900  |
| O  | -1.62731100 | 1.93280800  | -0.97700600 |
| C  | -1.36850600 | 3.33402700  | -1.12885800 |
| C  | -4.96817800 | -0.28137200 | -0.05146300 |
| H  | 4.27680900  | 1.01731400  | 1.50389000  |
| H  | 1.34562800  | -1.37559600 | -1.77571200 |
| H  | 3.79574200  | -1.26141300 | -2.10532800 |
| H  | -0.63225500 | 0.93506900  | 2.38892500  |
| H  | 1.77672700  | 1.48099700  | 2.75983300  |
| H  | -1.02859800 | -0.62812100 | -1.18020100 |
| H  | -0.24933400 | -2.61461100 | 0.01293300  |
| H  | -2.11913600 | -2.76845500 | -1.67673000 |
| H  | -3.27873300 | -2.75357300 | -0.34350000 |
| H  | -2.11393000 | -4.06108100 | -0.46447800 |
| H  | -0.81555300 | -1.94917500 | 2.36999400  |
| H  | -2.52853600 | -2.21363200 | 2.00711100  |
| H  | -1.39921800 | -3.55812700 | 1.93360400  |
| H  | -2.74821100 | -0.10488700 | 1.27868000  |
| H  | -2.30324300 | 3.89125900  | -1.11904000 |
| H  | -0.72590300 | 3.67927500  | -0.32028100 |
| H  | -0.86902000 | 3.43894300  | -2.08628800 |
| H  | -5.74290200 | -0.40128300 | -0.80413500 |
| H  | -5.00392100 | -1.10863000 | 0.66198500  |
| H  | -5.12772400 | 0.63616200  | 0.52053600  |
| Cl | 5.86702600  | -0.07037600 | -0.59649200 |

Compound **1b**, optimization level PCM-M06-2X/6-311++G(2d,p)

## Conformation #21

|    |             |             |             |
|----|-------------|-------------|-------------|
| C  | 3.51953100  | 0.52108600  | 0.87865500  |
| C  | 2.14983600  | 0.30996000  | 1.04552200  |
| C  | 1.34210300  | -0.26923500 | 0.04061200  |
| C  | 1.93374100  | -0.64105100 | -1.17321300 |
| C  | 3.28655200  | -0.43829900 | -1.35671800 |
| C  | 4.05206200  | 0.13514700  | -0.33034700 |
| C  | -0.00041400 | -0.32844800 | 0.55163800  |
| C  | 0.05146700  | 0.20958900  | 1.80805700  |
| N  | 1.33839600  | 0.59033800  | 2.11054700  |
| C  | -1.20248100 | -0.87255800 | -0.17237900 |
| C  | -1.52350800 | -2.34402800 | 0.19004700  |
| C  | -1.91682100 | -2.54343300 | 1.65252800  |
| C  | -0.34620000 | -3.24931800 | -0.16691400 |
| C  | -2.41218800 | 0.05093000  | 0.03276900  |
| C  | -3.62180200 | -0.34556000 | -0.82590500 |
| C  | -2.05542800 | 1.47096200  | -0.38094100 |
| O  | -3.46987300 | -0.85834900 | -1.90704800 |
| O  | -1.47770100 | 1.75277400  | -1.39810100 |
| O  | -2.48401900 | 2.37051800  | 0.50272100  |
| C  | -2.20456100 | 3.73904600  | 0.17444100  |
| C  | -4.97186000 | -0.03175500 | -0.25065700 |
| H  | 4.13301600  | 0.96379800  | 1.65173500  |
| H  | 1.34292300  | -1.08346100 | -1.96629000 |
| H  | 3.76762500  | -0.71587100 | -2.28455700 |
| H  | -0.73647700 | 0.35981500  | 2.52999100  |
| H  | 1.62871400  | 1.01701700  | 2.97540900  |
| H  | -0.98231200 | -0.85023800 | -1.24324400 |
| H  | -2.37032600 | -2.64008900 | -0.43562400 |
| H  | -1.09740900 | -2.26100400 | 2.31746600  |
| H  | -2.80010900 | -1.96656300 | 1.93382200  |
| H  | -2.14457500 | -3.59538700 | 1.83346700  |
| H  | 0.52414700  | -3.01535800 | 0.45111800  |
| H  | -0.60719700 | -4.29582800 | -0.00013300 |
| H  | -0.05948200 | -3.13382800 | -1.21448400 |
| H  | -2.72449900 | 0.08619400  | 1.07675300  |
| H  | -2.61718100 | 4.32655900  | 0.98783500  |
| H  | -1.12919700 | 3.88881200  | 0.09832300  |
| H  | -2.67960900 | 4.00010300  | -0.76924700 |
| H  | -5.75015100 | -0.19044700 | -0.99243500 |
| H  | -5.14211900 | -0.68157300 | 0.61201600  |
| H  | -4.99091500 | 0.99667600  | 0.11658400  |
| Cl | 5.76699700  | 0.37062100  | -0.60800500 |

Compound **1b**, optimization level PCM-M06-2X/6-311++G(2d,p)

## Conformation #22

|    |             |             |             |
|----|-------------|-------------|-------------|
| C  | 3.18697500  | -1.03389100 | -0.69946600 |
| C  | 1.83762100  | -1.36207000 | -0.56596100 |
| C  | 0.91905300  | -0.56515900 | 0.16043000  |
| C  | 1.39968700  | 0.60077800  | 0.77538200  |
| C  | 2.73193900  | 0.94246300  | 0.65357700  |
| C  | 3.60018200  | 0.12305600  | -0.08000100 |
| C  | -0.36452200 | -1.21792000 | 0.07000500  |
| C  | -0.16331200 | -2.34127100 | -0.67948200 |
| N  | 1.15173800  | -2.43544800 | -1.06364300 |
| C  | -1.68725500 | -0.80543100 | 0.66151300  |
| C  | -1.59238000 | -0.40580100 | 2.15125600  |
| C  | -0.95760700 | -1.54455700 | 2.95019000  |
| C  | -2.96301400 | -0.06646200 | 2.73927000  |
| C  | -2.40784000 | 0.23940600  | -0.22832100 |
| C  | -2.99137100 | -0.37561000 | -1.50310100 |
| C  | -1.52954000 | 1.42574700  | -0.55993000 |
| O  | -3.03480200 | -1.57261400 | -1.65567200 |
| O  | -0.92931100 | 1.57173200  | -1.59416200 |
| O  | -1.47514700 | 2.29765500  | 0.44935400  |
| C  | -0.66053500 | 3.45633200  | 0.22053300  |
| C  | -3.57771900 | 0.56604600  | -2.52254900 |
| H  | 3.87469100  | -1.65327500 | -1.25953400 |
| H  | 0.74321900  | 1.24452000  | 1.34532500  |
| H  | 3.11534200  | 1.83946300  | 1.12069500  |
| H  | -0.87959100 | -3.08972500 | -0.97818900 |
| H  | 1.54313900  | -3.17139300 | -1.62880100 |
| H  | -2.33544700 | -1.68622300 | 0.62268200  |
| H  | -0.95954300 | 0.47835200  | 2.25082900  |
| H  | -1.56351500 | -2.45151300 | 2.86181100  |
| H  | 0.04859300  | -1.77483700 | 2.59879800  |
| H  | -0.89895500 | -1.28048700 | 4.00719300  |
| H  | -2.88893100 | 0.03885300  | 3.82272900  |
| H  | -3.36544300 | 0.86993900  | 2.35163300  |
| H  | -3.68145100 | -0.86454200 | 2.52904300  |
| H  | -3.27781600 | 0.62702300  | 0.31095700  |
| H  | -1.07274700 | 4.04119400  | -0.59976200 |
| H  | -0.68757400 | 4.02211600  | 1.14617400  |
| H  | 0.35839700  | 3.15733600  | -0.02077400 |
| H  | -4.37651900 | 0.06038700  | -3.06048000 |
| H  | -3.94725000 | 1.48156900  | -2.06041000 |
| H  | -2.79109300 | 0.84293200  | -3.22617700 |
| Cl | 5.28307200  | 0.59578500  | -0.20849800 |



Compound **1b**, optimization level PCM-M06-2X/6-311++G(2d,p)

## Conformation #23

|    |             |             |             |
|----|-------------|-------------|-------------|
| C  | -3.40175900 | 0.58520400  | 0.79199100  |
| C  | -2.04180500 | 0.85361000  | 0.96048700  |
| C  | -1.08070400 | 0.56173500  | -0.03388300 |
| C  | -1.50497000 | -0.01709900 | -1.23740500 |
| C  | -2.84492900 | -0.28743700 | -1.42203300 |
| C  | -3.76568700 | 0.01617300  | -0.40666600 |
| C  | 0.20076400  | 0.95730000  | 0.48237700  |
| C  | -0.03359700 | 1.45868400  | 1.73251600  |
| N  | -1.37649200 | 1.40066100  | 2.02296000  |
| C  | 1.53429600  | 0.79493400  | -0.20076700 |
| C  | 2.35377800  | 2.10283200  | -0.14351300 |
| C  | 1.62576500  | 3.20797800  | -0.90858800 |
| C  | 3.77546600  | 1.96026300  | -0.68436400 |
| C  | 2.31425600  | -0.40061900 | 0.40214100  |
| C  | 3.32114600  | -1.03395500 | -0.56695700 |
| C  | 1.35364900  | -1.49833400 | 0.83073200  |
| O  | 3.17441600  | -0.96961300 | -1.76205800 |
| O  | 1.19569500  | -1.86970900 | 1.96520800  |
| O  | 0.69045300  | -1.99167200 | -0.21170900 |
| C  | -0.36480700 | -2.90942900 | 0.09860400  |
| C  | 4.46604500  | -1.76739900 | 0.07382200  |
| H  | -4.13247200 | 0.80779000  | 1.55775100  |
| H  | -0.79087500 | -0.26494200 | -2.01347500 |
| H  | -3.19831400 | -0.73649500 | -2.34022400 |
| H  | 0.65708700  | 1.85858500  | 2.45836200  |
| H  | -1.79799700 | 1.71170300  | 2.88326300  |
| H  | 1.35302500  | 0.55030100  | -1.25180200 |
| H  | 2.42406700  | 2.39617900  | 0.91045100  |
| H  | 2.16809800  | 4.15142900  | -0.82776800 |
| H  | 1.56045800  | 2.94759400  | -1.96892000 |
| H  | 0.61391000  | 3.36078600  | -0.53234400 |
| H  | 3.76447600  | 1.63126400  | -1.72555000 |
| H  | 4.28438100  | 2.92443700  | -0.63674300 |
| H  | 4.37560700  | 1.25280000  | -0.10795200 |
| H  | 2.83678900  | -0.09616100 | 1.31173400  |
| H  | -1.11231500 | -2.40884200 | 0.71444500  |
| H  | -0.79371900 | -3.19839000 | -0.85566700 |
| H  | 0.03165500  | -3.77621300 | 0.62367500  |
| H  | 5.04258500  | -2.30285900 | -0.67580400 |
| H  | 5.10519000  | -1.04795900 | 0.59172400  |
| H  | 4.08799400  | -2.45841700 | 0.83100400  |
| Cl | -5.45706700 | -0.35093700 | -0.68525700 |

Compound **1b**, optimization level PCM-M06-2X/6-311++G(2d,p)

## Conformation #37

|    |             |             |             |
|----|-------------|-------------|-------------|
| C  | 3.53934300  | -0.75042900 | -0.99894100 |
| C  | 2.15337400  | -0.58987400 | -1.01517900 |
| C  | 1.46494700  | 0.17771000  | -0.04842500 |
| C  | 2.20047300  | 0.80381200  | 0.96639900  |
| C  | 3.57267700  | 0.65447800  | 0.99941000  |
| C  | 4.21474100  | -0.11668200 | 0.01959400  |
| C  | 0.06355500  | 0.11827300  | -0.37183400 |
| C  | -0.03134300 | -0.66203100 | -1.49168900 |
| N  | 1.21761900  | -1.08677600 | -1.87978800 |
| C  | -1.02776100 | 0.81014600  | 0.40370000  |
| C  | -1.49130600 | 2.12799500  | -0.26215700 |
| C  | -0.31773100 | 3.09950200  | -0.37830400 |
| C  | -2.63362800 | 2.78483700  | 0.51283000  |
| C  | -2.21203200 | -0.11608200 | 0.78408000  |
| C  | -1.72941500 | -1.48789100 | 1.25429500  |
| C  | -3.24965900 | -0.31892100 | -0.29818500 |
| O  | -2.12034200 | -2.50300300 | 0.72756700  |
| O  | -3.04505900 | -0.30626800 | -1.48493900 |
| O  | -4.45285200 | -0.53486800 | 0.23385200  |
| C  | -5.50323800 | -0.80667700 | -0.70195500 |
| C  | -0.75927100 | -1.49935800 | 2.40292700  |
| H  | 4.06012700  | -1.33908900 | -1.74214900 |
| H  | 1.70842300  | 1.40425800  | 1.72280500  |
| H  | 4.16246600  | 1.12727800  | 1.77272600  |
| H  | -0.90662300 | -0.95287000 | -2.04760100 |
| H  | 1.40538000  | -1.68077000 | -2.67115800 |
| H  | -0.58678600 | 1.09983600  | 1.36531700  |
| H  | -1.84036000 | 1.88353100  | -1.26866700 |
| H  | 0.05952200  | 3.36252900  | 0.61472500  |
| H  | 0.50564400  | 2.67273100  | -0.95203000 |
| H  | -0.63525400 | 4.02012600  | -0.87055100 |
| H  | -2.34844500 | 2.94108600  | 1.55785800  |
| H  | -2.86812900 | 3.75925900  | 0.08173100  |
| H  | -3.55107700 | 2.19289900  | 0.49744800  |
| H  | -2.72756600 | 0.32647600  | 1.64120500  |
| H  | -5.63948200 | 0.04397200  | -1.36728700 |
| H  | -5.26131500 | -1.69321100 | -1.28534200 |
| H  | -6.39430300 | -0.97185200 | -0.10524700 |
| H  | -0.67653000 | -2.50800000 | 2.80006100  |
| H  | 0.22002400  | -1.17172600 | 2.04456200  |
| H  | -1.07612500 | -0.80523100 | 3.18243900  |
| Cl | 5.95827900  | -0.27785500 | 0.10096700  |

Compound **1b**, optimization level PCM-M06-2X/6-311++G(2d,p)

## Conformation #44

|    |             |             |             |
|----|-------------|-------------|-------------|
| C  | -3.39244600 | -0.23787100 | 0.85040200  |
| C  | -2.04796300 | -0.44588200 | 1.16383400  |
| C  | -1.03310300 | -0.50368100 | 0.17994700  |
| C  | -1.39478600 | -0.33841000 | -1.16461600 |
| C  | -2.71891700 | -0.13350400 | -1.49380300 |
| C  | -3.69148200 | -0.08798500 | -0.48392600 |
| C  | 0.21368900  | -0.70545400 | 0.87357800  |
| C  | -0.09687600 | -0.75855100 | 2.20163500  |
| N  | -1.45053500 | -0.60838800 | 2.38425000  |
| C  | 1.59478300  | -0.85744300 | 0.29762200  |
| C  | 1.68508000  | -2.08057500 | -0.64417400 |
| C  | 1.28946000  | -3.35506000 | 0.09992000  |
| C  | 3.07273500  | -2.25343500 | -1.26030000 |
| C  | 2.08842100  | 0.43423300  | -0.40999800 |
| C  | 3.60837700  | 0.61766400  | -0.34147200 |
| C  | 1.47985200  | 1.64945800  | 0.26680000  |
| O  | 4.26689300  | 0.12154500  | 0.53805800  |
| O  | 1.83901700  | 2.08047000  | 1.33304000  |
| O  | 0.47693400  | 2.15914300  | -0.44103100 |
| C  | -0.30093000 | 3.16322800  | 0.22170500  |
| C  | 4.20774600  | 1.48743500  | -1.41112600 |
| H  | -4.15982800 | -0.19222000 | 1.61154500  |
| H  | -0.64849700 | -0.35327000 | -1.94910900 |
| H  | -3.01843300 | -0.00195600 | -2.52453900 |
| H  | 0.55812800  | -0.89778400 | 3.04761600  |
| H  | -1.92140800 | -0.60367600 | 3.27446500  |
| H  | 2.27995300  | -1.02399400 | 1.13473300  |
| H  | 0.96941800  | -1.92437000 | -1.45887300 |
| H  | 1.95844600  | -3.51901000 | 0.95002500  |
| H  | 0.26840700  | -3.30155900 | 0.47820900  |
| H  | 1.36604700  | -4.22016600 | -0.56067800 |
| H  | 3.09128700  | -3.14727700 | -1.88580500 |
| H  | 3.35847000  | -1.41229600 | -1.89568600 |
| H  | 3.83037400  | -2.36501300 | -0.48127800 |
| H  | 1.77486200  | 0.44515700  | -1.45652400 |
| H  | 0.31994400  | 4.02170700  | 0.47000000  |
| H  | -1.08059100 | 3.44224200  | -0.47987800 |
| H  | -0.73451300 | 2.74440400  | 1.12973700  |
| H  | 5.25812700  | 1.67461600  | -1.20451100 |
| H  | 4.10147200  | 0.98903900  | -2.37789900 |
| H  | 3.65969600  | 2.43034900  | -1.47695400 |
| Cl | -5.36012900 | 0.17762000  | -0.95006200 |

Compound **1b**, optimization level PCM-M11/6-311++G(2d,p)

## Conformation #1

|    |             |             |             |
|----|-------------|-------------|-------------|
| C  | -3.81841500 | -0.69553000 | -0.24858400 |
| C  | -2.48749200 | -1.10062900 | -0.14046800 |
| C  | -1.46768700 | -0.22686200 | 0.29035100  |
| C  | -1.79219100 | 1.09413200  | 0.61847800  |
| C  | -3.10137800 | 1.51130300  | 0.51470800  |
| C  | -4.08583900 | 0.61058400  | 0.08444500  |
| C  | -0.23664000 | -0.97128400 | 0.28621400  |
| C  | -0.55477000 | -2.22605100 | -0.14389100 |
| N  | -1.90521200 | -2.31214100 | -0.39653600 |
| C  | 1.12063600  | -0.41170200 | 0.62454800  |
| C  | 2.05423500  | -1.47921600 | 1.23900200  |
| C  | 1.54354400  | -1.83529200 | 2.63832500  |
| C  | 3.51346000  | -1.03149000 | 1.31690400  |
| C  | 1.63736200  | 0.35541300  | -0.62116900 |
| C  | 1.96642100  | -0.51430300 | -1.83532600 |
| C  | 2.81456600  | 1.27860800  | -0.36215700 |
| O  | 2.35561400  | -1.65201800 | -1.71050700 |
| O  | 3.80379600  | 1.34256700  | -1.05373800 |
| O  | 2.61769500  | 2.04953000  | 0.70415800  |
| C  | 3.70126000  | 2.93775600  | 1.03577400  |
| C  | 1.75405200  | 0.12703200  | -3.17697200 |
| H  | -4.60519500 | -1.36708300 | -0.57834400 |
| H  | -1.02483600 | 1.78973800  | 0.95384800  |
| H  | -3.38410800 | 2.52993100  | 0.76193000  |
| H  | 0.08485500  | -3.08621900 | -0.29768700 |
| H  | -2.38353300 | -3.13990500 | -0.71847900 |
| H  | 0.97629800  | 0.36162700  | 1.39331200  |
| H  | 2.01545600  | -2.37287300 | 0.60872400  |
| H  | 1.62815400  | -0.96596700 | 3.30430500  |
| H  | 0.49417300  | -2.14788800 | 2.61693900  |
| H  | 2.13628800  | -2.64887600 | 3.07088200  |
| H  | 3.60777600  | -0.08995300 | 1.87509300  |
| H  | 4.10674600  | -1.78667400 | 1.84441900  |
| H  | 3.95254600  | -0.90145400 | 0.32238700  |
| H  | 0.82733400  | 1.03636000  | -0.92485500 |
| H  | 4.60196800  | 2.35226600  | 1.24079200  |
| H  | 3.88749200  | 3.62259400  | 0.20528700  |
| H  | 3.38123600  | 3.48082600  | 1.92402900  |
| H  | 2.19532100  | -0.48191000 | -3.96712300 |
| H  | 0.67295600  | 0.22040600  | -3.34243700 |
| H  | 2.17690700  | 1.13668000  | -3.18208300 |
| Cl | -5.74087900 | 1.18752500  | -0.03385800 |

Compound **1b**, optimization level PCM-M11/6-311++G(2d,p)

## Conformation #2

|    |             |             |             |
|----|-------------|-------------|-------------|
| C  | -3.48046200 | -0.17789000 | 1.00189500  |
| C  | -2.10677200 | 0.02594100  | 1.14208800  |
| C  | -1.26841100 | 0.30284100  | 0.04227400  |
| C  | -1.82635200 | 0.36980700  | -1.23924400 |
| C  | -3.18001900 | 0.16826700  | -1.39658600 |
| C  | -3.97902300 | -0.09872500 | -0.27549900 |
| C  | 0.06924200  | 0.45071800  | 0.55101300  |
| C  | -0.01717800 | 0.25350500  | 1.89990400  |
| N  | -1.32022900 | 0.00283600  | 2.26150100  |
| C  | 1.30278700  | 0.74699300  | -0.25949900 |
| C  | 1.66373100  | 2.25443400  | -0.29737100 |
| C  | 2.00560800  | 2.83109600  | 1.07701800  |
| C  | 0.52393100  | 3.05242000  | -0.93184600 |
| C  | 2.48416900  | -0.10352500 | 0.22898400  |
| C  | 3.69310700  | -0.04039500 | -0.71714100 |
| C  | 2.11284000  | -1.57529700 | 0.34402700  |
| O  | 3.54526600  | 0.17412200  | -1.89677300 |
| O  | 2.41309200  | -2.28082500 | 1.27715000  |
| O  | 1.44509200  | -2.00758900 | -0.72044600 |
| C  | 1.04582000  | -3.39025400 | -0.68815100 |
| C  | 5.03164200  | -0.28664400 | -0.08453400 |
| H  | -4.12543000 | -0.38879400 | 1.84948500  |
| H  | -1.20389500 | 0.57828900  | -2.10679100 |
| H  | -3.64044300 | 0.21335600  | -2.37877000 |
| H  | 0.76360500  | 0.26698200  | 2.65178300  |
| H  | -1.63697300 | -0.18380900 | 3.20086300  |
| H  | 1.10671900  | 0.43977500  | -1.29442100 |
| H  | 2.54514300  | 2.34911200  | -0.94486400 |
| H  | 1.14866700  | 2.74405200  | 1.75593200  |
| H  | 2.86619700  | 2.33753200  | 1.54306300  |
| H  | 2.25118200  | 3.89477600  | 0.98426600  |
| H  | -0.37509600 | 3.00327900  | -0.30469900 |
| H  | 0.80495100  | 4.10583900  | -1.03951300 |
| H  | 0.26837500  | 2.66371200  | -1.92490500 |
| H  | 2.81417800  | 0.18657400  | 1.23122200  |
| H  | 1.92980900  | -4.02843800 | -0.61527600 |
| H  | 0.39319500  | -3.56292800 | 0.17132100  |
| H  | 0.51324500  | -3.56918100 | -1.62125000 |
| H  | 5.79966900  | -0.42560200 | -0.84619400 |
| H  | 5.28103700  | 0.57865600  | 0.54236200  |
| H  | 4.97509900  | -1.15732400 | 0.57879300  |
| Cl | -5.70077700 | -0.34418400 | -0.52507900 |

Compound **1b**, optimization level PCM-M11/6-311++G(2d,p)

## Conformation #3

|    |             |             |             |
|----|-------------|-------------|-------------|
| C  | -3.86997500 | 0.46103100  | 0.58055400  |
| C  | -2.54505400 | 0.89880900  | 0.58208000  |
| C  | -1.55155700 | 0.29488000  | -0.21628700 |
| C  | -1.89686600 | -0.78457100 | -1.03702400 |
| C  | -3.20030600 | -1.23162400 | -1.04815500 |
| C  | -4.15842400 | -0.60154800 | -0.24155800 |
| C  | -0.32008900 | 0.99710600  | 0.02977800  |
| C  | -0.61228400 | 1.96230700  | 0.94848200  |
| N  | -1.94721300 | 1.91232500  | 1.28024000  |
| C  | 1.01860200  | 0.65043900  | -0.56740900 |
| C  | 1.92489300  | 1.89240200  | -0.72372600 |
| C  | 1.34787100  | 2.79168600  | -1.82126400 |
| C  | 3.37778900  | 1.54634300  | -1.04917000 |
| C  | 1.59421300  | -0.55055200 | 0.22746200  |
| C  | 1.99132800  | -0.24481700 | 1.67221000  |
| C  | 2.70627900  | -1.26139400 | -0.52614700 |
| O  | 2.43361700  | 0.83387600  | 1.99363100  |
| O  | 2.63312900  | -1.56129300 | -1.69177000 |
| O  | 3.75983900  | -1.54621600 | 0.23929300  |
| C  | 4.85438700  | -2.20409100 | -0.42661100 |
| C  | 1.76305400  | -1.35167600 | 2.66306100  |
| H  | -4.63638500 | 0.92680800  | 1.19251800  |
| H  | -1.15043600 | -1.26954800 | -1.66361000 |
| H  | -3.49878900 | -2.06682600 | -1.67426700 |
| H  | 0.03587000  | 2.69953900  | 1.40567900  |
| H  | -2.40604200 | 2.52870100  | 1.93371500  |
| H  | 0.84480600  | 0.25277600  | -1.57899100 |
| H  | 1.92021500  | 2.44117300  | 0.22307600  |
| H  | 1.38997400  | 2.27868500  | -2.79144200 |
| H  | 0.30430800  | 3.05539900  | -1.61971200 |
| H  | 1.92665900  | 3.71814000  | -1.90574500 |
| H  | 3.44455600  | 0.94580000  | -1.96526300 |
| H  | 3.95064100  | 2.46637300  | -1.21077200 |
| H  | 3.85806300  | 1.00021000  | -0.22951100 |
| H  | 0.79469200  | -1.30516900 | 0.27216500  |
| H  | 5.22659400  | -1.56366500 | -1.23078500 |
| H  | 5.61862200  | -2.35648800 | 0.33425400  |
| H  | 4.51722800  | -3.15798400 | -0.83860400 |
| H  | 0.68027400  | -1.45685800 | 2.81064900  |
| H  | 2.13257600  | -2.30120200 | 2.26249400  |
| H  | 2.24285500  | -1.11975600 | 3.61480700  |
| Cl | -5.80715500 | -1.20598200 | -0.28877800 |

Compound **1b**, optimization level PCM-M11/6-311++G(2d,p)

## Conformation #5

|    |             |             |             |
|----|-------------|-------------|-------------|
| C  | 3.51435000  | 0.45810500  | 0.86758800  |
| C  | 2.14018200  | 0.28887300  | 1.04433700  |
| C  | 1.31359900  | -0.27047600 | 0.04821700  |
| C  | 1.88449100  | -0.66590900 | -1.16673000 |
| C  | 3.23875800  | -0.50472600 | -1.35905700 |
| C  | 4.02599500  | 0.05059300  | -0.33999100 |
| C  | -0.02815000 | -0.28741900 | 0.56760700  |
| C  | 0.04459600  | 0.25605100  | 1.81896400  |
| N  | 1.34271600  | 0.59915800  | 2.11222800  |
| C  | -1.25075600 | -0.79672600 | -0.14825500 |
| C  | -1.60800500 | -2.26309900 | 0.20212000  |
| C  | -2.05419700 | -2.43424600 | 1.65433200  |
| C  | -0.43180500 | -3.18755000 | -0.11160000 |
| C  | -2.44153700 | 0.15458300  | 0.10816400  |
| C  | -3.70068300 | -0.33533500 | -0.61287000 |
| C  | -2.06566800 | 1.55061600  | -0.35550300 |
| O  | -4.68502800 | -0.61902800 | 0.03199600  |
| O  | -1.55059200 | 1.80261400  | -1.41827800 |
| O  | -2.36810600 | 2.47758100  | 0.54996900  |
| C  | -2.03266600 | 3.83121000  | 0.18891200  |
| C  | -3.64377500 | -0.48986800 | -2.10733800 |
| H  | 4.14955700  | 0.88793800  | 1.63605400  |
| H  | 1.27233600  | -1.09517300 | -1.95689100 |
| H  | 3.70885700  | -0.80160700 | -2.29153100 |
| H  | -0.74170100 | 0.43673900  | 2.54249400  |
| H  | 1.65024900  | 1.02268700  | 2.97462800  |
| H  | -1.03553800 | -0.75457400 | -1.22546100 |
| H  | -2.44726000 | -2.55577300 | -0.44621900 |
| H  | -2.25358300 | -3.49116400 | 1.86190900  |
| H  | -1.26600500 | -2.10189000 | 2.34104800  |
| H  | -2.97027200 | -1.87477300 | 1.87434500  |
| H  | 0.41752800  | -2.96363200 | 0.54546800  |
| H  | -0.71542700 | -4.23405900 | 0.04336300  |
| H  | -0.09837600 | -3.07353500 | -1.14998300 |
| H  | -2.68692200 | 0.20186500  | 1.17166000  |
| H  | -0.95602900 | 3.90890700  | 0.01934800  |
| H  | -2.57104100 | 4.11475600  | -0.71859700 |
| H  | -2.33910400 | 4.44940500  | 1.03161100  |
| H  | -3.17384600 | 0.38280900  | -2.56902800 |
| H  | -3.01941800 | -1.35871400 | -2.34972600 |
| H  | -4.64879000 | -0.65122600 | -2.49898600 |
| Cl | 5.74865900  | 0.23173600  | -0.63082300 |

Compound **1b**, optimization level PCM-M11/6-311++G(2d,p)

## Conformation #7

|    |             |             |             |
|----|-------------|-------------|-------------|
| C  | -3.40931800 | -0.16693500 | 0.86851900  |
| C  | -2.06871800 | -0.37764100 | 1.19416400  |
| C  | -1.04099100 | -0.43267900 | 0.22520500  |
| C  | -1.39606100 | -0.26652100 | -1.12259700 |
| C  | -2.71337000 | -0.05330100 | -1.46190900 |
| C  | -3.69547300 | -0.00722200 | -0.46359000 |
| C  | 0.19533700  | -0.65071000 | 0.94361500  |
| C  | -0.14281200 | -0.70828800 | 2.26506900  |
| N  | -1.49515100 | -0.55541300 | 2.42319600  |
| C  | 1.61264400  | -0.76174000 | 0.44293700  |
| C  | 1.97859700  | -2.13459400 | -0.16633000 |
| C  | 1.21919100  | -2.45122300 | -1.45401300 |
| C  | 1.76562500  | -3.24161300 | 0.86582500  |
| C  | 1.93554700  | 0.41572400  | -0.51712000 |
| C  | 3.35237700  | 0.28493900  | -1.07793600 |
| C  | 1.75234100  | 1.70757800  | 0.25388100  |
| O  | 3.49935300  | 0.06118800  | -2.25914200 |
| O  | 2.33620000  | 1.97720900  | 1.27642500  |
| O  | 0.85267800  | 2.50864500  | -0.31047600 |
| C  | 0.58761300  | 3.73753000  | 0.39199100  |
| C  | 4.51817700  | 0.41049800  | -0.13808000 |
| H  | -4.18715600 | -0.12857000 | 1.62518600  |
| H  | -0.65402100 | -0.31593500 | -1.91413500 |
| H  | -3.00318100 | 0.07674700  | -2.50008300 |
| H  | 0.50326200  | -0.84863900 | 3.12362200  |
| H  | -1.98303300 | -0.55336200 | 3.30628600  |
| H  | 2.25542900  | -0.62476100 | 1.32312200  |
| H  | 3.05319500  | -2.09983700 | -0.40213900 |
| H  | 0.14413100  | -2.53079100 | -1.25392500 |
| H  | 1.38026500  | -1.69008500 | -2.22644600 |
| H  | 1.55464600  | -3.41198100 | -1.85985300 |
| H  | 0.69770500  | -3.35751000 | 1.08612300  |
| H  | 2.14143200  | -4.19787200 | 0.48616300  |
| H  | 2.28320900  | -3.01631000 | 1.80627100  |
| H  | 1.26125200  | 0.42242200  | -1.37394200 |
| H  | 0.22571400  | 3.51389300  | 1.39856600  |
| H  | 1.50178200  | 4.33303100  | 0.45202000  |
| H  | -0.17499600 | 4.25460900  | -0.18881900 |
| H  | 4.33622500  | -0.13624900 | 0.79200400  |
| H  | 5.42274400  | 0.04994300  | -0.62959600 |
| H  | 4.63813100  | 1.46519400  | 0.13355300  |
| Cl | -5.36122100 | 0.26381200  | -0.94697600 |



Compound **1b**, optimization level PCM-M11/6-311++G(2d,p)

## Conformation #8

|    |             |             |             |
|----|-------------|-------------|-------------|
| C  | 3.42309300  | 0.14175400  | 0.83498300  |
| C  | 2.09061100  | 0.43271500  | 1.13276800  |
| C  | 1.06357300  | 0.39918400  | 0.16274700  |
| C  | 1.40523500  | 0.05345600  | -1.15308700 |
| C  | 2.71372800  | -0.23963400 | -1.46459800 |
| C  | 3.69795600  | -0.18936300 | -0.46769800 |
| C  | -0.16413900 | 0.74942500  | 0.83955900  |
| C  | 0.17615900  | 0.96306100  | 2.14400800  |
| N  | 1.52356700  | 0.78340100  | 2.32696400  |
| C  | -1.56934000 | 0.87071700  | 0.30682700  |
| C  | -1.85811900 | 2.22894100  | -0.38192800 |
| C  | -0.94394600 | 2.51784900  | -1.57342100 |
| C  | -1.76193400 | 3.36509000  | 0.63660700  |
| C  | -1.95233200 | -0.30660400 | -0.60561200 |
| C  | -3.47201000 | -0.41262500 | -0.81413800 |
| C  | -1.50175100 | -1.63952700 | -0.02697900 |
| O  | -4.24788600 | 0.09255900  | -0.03889900 |
| O  | -0.84749400 | -2.46069200 | -0.62195700 |
| O  | -1.93812000 | -1.80630400 | 1.21868900  |
| C  | -1.53012200 | -3.02618500 | 1.86429400  |
| C  | -3.90914000 | -1.18923000 | -2.02331500 |
| H  | 4.20373400  | 0.17337200  | 1.58909700  |
| H  | 0.65499100  | 0.01357400  | -1.93755500 |
| H  | 2.99559500  | -0.51044200 | -2.47748300 |
| H  | -0.46399400 | 1.23499800  | 2.97500900  |
| H  | 2.01060000  | 0.87695300  | 3.20547500  |
| H  | -2.24301600 | 0.80930700  | 1.17030600  |
| H  | -2.89511200 | 2.18305900  | -0.74024800 |
| H  | -1.21577100 | 3.47697900  | -2.02811400 |
| H  | 0.10189500  | 2.58412800  | -1.25041800 |
| H  | -1.01515100 | 1.75478700  | -2.35726500 |
| H  | -0.72999100 | 3.47372900  | 0.99216500  |
| H  | -2.06609700 | 4.31542500  | 0.18418900  |
| H  | -2.40329500 | 3.17708500  | 1.50612300  |
| H  | -1.48546100 | -0.24343900 | -1.59248800 |
| H  | -0.43901800 | -3.06368500 | 1.91808200  |
| H  | -1.96669200 | -2.99761900 | 2.86176700  |
| H  | -1.90197800 | -3.88529700 | 1.30070000  |
| H  | -3.70041900 | -0.58277600 | -2.91342100 |
| H  | -3.32180900 | -2.10950900 | -2.11701500 |
| H  | -4.97549200 | -1.41188400 | -1.97241300 |
| Cl | 5.35378700  | -0.56889400 | -0.91376500 |

Compound **1b**, optimization level PCM-M11/6-311++G(2d,p)

## Conformation #9

|    |             |             |             |
|----|-------------|-------------|-------------|
| C  | 3.50367700  | -0.04645700 | 0.99741600  |
| C  | 2.12865600  | -0.24014000 | 1.13862200  |
| C  | 1.25857400  | -0.31378200 | 0.03137600  |
| C  | 1.78571200  | -0.18358100 | -1.25838800 |
| C  | 3.14037300  | 0.00960600  | -1.41632900 |
| C  | 3.97130900  | 0.07249100  | -0.28844900 |
| C  | -0.07056800 | -0.51182000 | 0.54595500  |
| C  | 0.05177000  | -0.54040500 | 1.90639300  |
| N  | 1.36839000  | -0.38328100 | 2.26743400  |
| C  | -1.32591300 | -0.64318500 | -0.27403400 |
| C  | -1.75272000 | -2.10818800 | -0.53685500 |
| C  | -2.18852400 | -2.83888000 | 0.73295800  |
| C  | -0.62647500 | -2.87023300 | -1.23517800 |
| C  | -2.46415300 | 0.17547800  | 0.38133400  |
| C  | -3.76816000 | 0.03501800  | -0.40962200 |
| C  | -2.06599800 | 1.63257200  | 0.53600400  |
| O  | -4.70437700 | -0.54942600 | 0.08724400  |
| O  | -2.26953800 | 2.28431300  | 1.53182800  |
| O  | -1.47266600 | 2.12321800  | -0.55006800 |
| C  | -1.06863200 | 3.50293900  | -0.47246500 |
| C  | -3.83106000 | 0.61568400  | -1.79493900 |
| H  | 4.17231700  | 0.00961800  | 1.85094900  |
| H  | 1.14002600  | -0.23241400 | -2.13264500 |
| H  | 3.57729800  | 0.11448700  | -2.40462900 |
| H  | -0.70980800 | -0.65814800 | 2.66820000  |
| H  | 1.71097100  | -0.36140500 | 3.21612100  |
| H  | -1.11657100 | -0.18942400 | -1.25110000 |
| H  | -2.61118300 | -2.07085100 | -1.22510400 |
| H  | -1.37059600 | -2.85670500 | 1.46389200  |
| H  | -3.06516400 | -2.37464400 | 1.19757700  |
| H  | -2.44714500 | -3.87701300 | 0.49740800  |
| H  | 0.24057200  | -2.96608600 | -0.56995800 |
| H  | -0.95767000 | -3.87752100 | -1.50972100 |
| H  | -0.30027800 | -2.35656100 | -2.14748300 |
| H  | -2.67450300 | -0.19274200 | 1.38821100  |
| H  | -0.35610000 | 3.63038000  | 0.34610300  |
| H  | -0.60403800 | 3.73235700  | -1.43053500 |
| H  | -1.94375700 | 4.13484000  | -0.30210700 |
| H  | -4.71562500 | 0.23985500  | -2.31047900 |
| H  | -3.88874900 | 1.70804900  | -1.71721800 |
| H  | -2.92400400 | 0.38413900  | -2.36171300 |
| Cl | 5.69239400  | 0.31736600  | -0.54074300 |

Compound **1b**, optimization level PCM-M11/6-311++G(2d,p)

## Conformation #14

|    |             |             |             |
|----|-------------|-------------|-------------|
| C  | -3.38765600 | -0.02205900 | 1.19168400  |
| C  | -2.02775500 | 0.29347400  | 1.18898900  |
| C  | -1.28933600 | 0.45109300  | -0.00283700 |
| C  | -1.94052200 | 0.28605900  | -1.23175700 |
| C  | -3.28242900 | -0.02392900 | -1.24737800 |
| C  | -3.97817800 | -0.17317800 | -0.03875400 |
| C  | 0.06325000  | 0.77266100  | 0.37332100  |
| C  | 0.08046400  | 0.79772000  | 1.73788200  |
| N  | -1.16959800 | 0.51016900  | 2.23232700  |
| C  | 1.21437800  | 0.99394400  | -0.57467300 |
| C  | 2.09066600  | 2.20084100  | -0.17179000 |
| C  | 1.27272300  | 3.48662700  | -0.31236000 |
| C  | 3.36228000  | 2.29465800  | -1.01656200 |
| C  | 2.02417200  | -0.30502600 | -0.82521300 |
| C  | 1.04472300  | -1.41869700 | -1.21691400 |
| C  | 2.91243100  | -0.72997400 | 0.32449200  |
| O  | 0.59506400  | -1.42639700 | -2.34026000 |
| O  | 2.90548000  | -0.27938300 | 1.44298600  |
| O  | 3.73511000  | -1.71237200 | -0.05815400 |
| C  | 4.60423300  | -2.23287800 | 0.96417600  |
| C  | 0.64076700  | -2.42222000 | -0.17383200 |
| H  | -3.95347100 | -0.14306700 | 2.11038300  |
| H  | -1.39569800 | 0.39128100  | -2.16725200 |
| H  | -3.81259100 | -0.15757600 | -2.18536800 |
| H  | 0.90771300  | 0.98713900  | 2.40875200  |
| H  | -1.41268700 | 0.47944500  | 3.21101900  |
| H  | 0.78126900  | 1.23037100  | -1.55915900 |
| H  | 2.37778400  | 2.07594100  | 0.87865300  |
| H  | 1.01066700  | 3.65492100  | -1.36552900 |
| H  | 0.34484300  | 3.43608400  | 0.26693700  |
| H  | 1.84858100  | 4.35191300  | 0.03357400  |
| H  | 3.11580300  | 2.28724000  | -2.08733200 |
| H  | 3.89085400  | 3.22948800  | -0.80152100 |
| H  | 4.05924400  | 1.47145300  | -0.82066800 |
| H  | 2.67188600  | -0.16199000 | -1.69637200 |
| H  | 4.00586300  | -2.64426000 | 1.78130500  |
| H  | 5.19541100  | -3.01287600 | 0.48614200  |
| H  | 5.24706400  | -1.43508300 | 1.34379900  |
| H  | -0.23761100 | -2.97611100 | -0.50823500 |
| H  | 1.47376100  | -3.11734500 | -0.01119100 |
| H  | 0.44032900  | -1.91175000 | 0.77566700  |
| Cl | -5.68719500 | -0.57387500 | -0.11101800 |

Compound **1b**, optimization level PCM-M11/6-311++G(2d,p)

## Conformation #15

|    |             |             |             |
|----|-------------|-------------|-------------|
| C  | -3.36594800 | -0.53309900 | 0.75039200  |
| C  | -2.03277300 | -0.85972900 | 1.00484500  |
| C  | -0.98074800 | -0.53537900 | 0.11825000  |
| C  | -1.29988000 | 0.14161500  | -1.06856200 |
| C  | -2.60903800 | 0.47404200  | -1.33496900 |
| C  | -3.61704200 | 0.13211700  | -0.42292000 |
| C  | 0.23930000  | -1.02441100 | 0.71885300  |
| C  | -0.12973300 | -1.59757200 | 1.90081500  |
| N  | -1.48747300 | -1.51067100 | 2.07654400  |
| C  | 1.66461500  | -0.93794700 | 0.23471400  |
| C  | 2.04638000  | -2.04902500 | -0.77525300 |
| C  | 1.17808100  | -2.04956900 | -2.03435400 |
| C  | 1.98615700  | -3.41868400 | -0.09870800 |
| C  | 2.00887700  | 0.45571400  | -0.31540400 |
| C  | 3.52503700  | 0.67692300  | -0.43563400 |
| C  | 1.50884800  | 1.53801300  | 0.62972100  |
| O  | 4.30471000  | 0.03232100  | 0.22364400  |
| O  | 1.74062400  | 1.55336100  | 1.81349400  |
| O  | 0.80161500  | 2.47547300  | 0.00357200  |
| C  | 0.26992700  | 3.51711100  | 0.84400000  |
| C  | 3.95267600  | 1.74720800  | -1.39868100 |
| H  | -4.16452700 | -0.78842300 | 1.44038400  |
| H  | -0.53243100 | 0.40771500  | -1.78962900 |
| H  | -2.87346000 | 0.99785500  | -2.24839200 |
| H  | 0.49633900  | -2.06681800 | 2.65047800  |
| H  | -1.99544500 | -1.85601900 | 2.87677600  |
| H  | 2.30763200  | -1.07427900 | 1.11305900  |
| H  | 3.08798300  | -1.86234400 | -1.06866100 |
| H  | 1.22930900  | -1.10247500 | -2.58407300 |
| H  | 1.50912500  | -2.84033600 | -2.71673400 |
| H  | 0.12936100  | -2.24359300 | -1.77890300 |
| H  | 0.95322200  | -3.66414500 | 0.17675500  |
| H  | 2.35097300  | -4.19950600 | -0.77513800 |
| H  | 2.59585800  | -3.44070500 | 0.81262200  |
| H  | 1.56579100  | 0.64479600  | -1.29713900 |
| H  | 1.08667400  | 4.03803600  | 1.34932600  |
| H  | -0.26946800 | 4.19079600  | 0.17954300  |
| H  | -0.40397100 | 3.07861500  | 1.58445400  |
| H  | 5.00706900  | 1.98946100  | -1.26162700 |
| H  | 3.78697300  | 1.37739000  | -2.41809900 |
| H  | 3.32801400  | 2.63929200  | -1.27597600 |
| Cl | -5.27216000 | 0.57624600  | -0.80783200 |

Compound **1b**, optimization level PCM-M11/6-311++G(2d,p)

## Conformation #17

|    |             |             |             |
|----|-------------|-------------|-------------|
| C  | 3.13810400  | 0.25704300  | 1.17246200  |
| C  | 1.78411000  | 0.55441900  | 1.32585300  |
| C  | 0.86735500  | 0.53804400  | 0.24934400  |
| C  | 1.35021300  | 0.20674200  | -1.02518700 |
| C  | 2.68640800  | -0.08679300 | -1.19549000 |
| C  | 3.55478700  | -0.05612200 | -0.09767400 |
| C  | -0.42322200 | 0.89335800  | 0.79499200  |
| C  | -0.22376400 | 1.09988100  | 2.12769400  |
| N  | 1.09392200  | 0.89854500  | 2.45550300  |
| C  | -1.74394100 | 1.06654200  | 0.08789800  |
| C  | -1.62480000 | 1.92841200  | -1.19035500 |
| C  | -1.02595600 | 3.29109400  | -0.83387800 |
| C  | -2.97904800 | 2.11449500  | -1.87981000 |
| C  | -2.46048200 | -0.28519800 | -0.15321700 |
| C  | -2.96948200 | -0.92751900 | 1.13706600  |
| C  | -1.61003700 | -1.21602000 | -0.98934400 |
| O  | -2.99251500 | -0.30537400 | 2.17395300  |
| O  | -1.53062200 | -1.15309100 | -2.19440600 |
| O  | -0.92000900 | -2.08574000 | -0.25572900 |
| C  | -0.06617900 | -2.98839600 | -0.98340800 |
| C  | -3.52175200 | -2.32863800 | 1.04958500  |
| H  | 3.83000900  | 0.27102400  | 2.00903800  |
| H  | 0.68771900  | 0.15836500  | -1.88522100 |
| H  | 3.07582200  | -0.34619500 | -2.17534400 |
| H  | -0.94933200 | 1.37658900  | 2.88207500  |
| H  | 1.48665500  | 0.98782400  | 3.38034400  |
| H  | -2.40397600 | 1.61018600  | 0.77731400  |
| H  | -0.95388300 | 1.42830400  | -1.89826500 |
| H  | -0.94894300 | 3.92244000  | -1.72562600 |
| H  | -1.66824400 | 3.80782000  | -0.10755700 |
| H  | -0.02824400 | 3.19221700  | -0.39419200 |
| H  | -3.73979600 | 2.44153100  | -1.15762400 |
| H  | -2.90458000 | 2.88186100  | -2.65774500 |
| H  | -3.32859800 | 1.19510700  | -2.36095200 |
| H  | -3.36718800 | -0.10411300 | -0.74501700 |
| H  | 0.68930700  | -2.41807500 | -1.52922700 |
| H  | 0.39836600  | -3.62830500 | -0.23410800 |
| H  | -0.66564000 | -3.57775900 | -1.68173700 |
| H  | -4.39940400 | -2.40766800 | 1.69486400  |
| H  | -3.77667600 | -2.60565100 | 0.02267200  |
| H  | -2.75706700 | -3.02311000 | 1.41204900  |
| Cl | 5.24809000  | -0.43921400 | -0.36376400 |

Compound **1b**, optimization level PCM-M11/6-311++G(2d,p)

## Conformation #20

|    |             |             |             |
|----|-------------|-------------|-------------|
| C  | 3.64160700  | 0.51874700  | 0.81113400  |
| C  | 2.25685800  | 0.45850700  | 0.97485300  |
| C  | 1.42083400  | -0.22076400 | 0.06512200  |
| C  | 1.99037900  | -0.86066100 | -1.04109600 |
| C  | 3.35600300  | -0.81227300 | -1.21707400 |
| C  | 4.15233000  | -0.12519900 | -0.28969900 |
| C  | 0.06902900  | -0.07023300 | 0.53335600  |
| C  | 0.14533200  | 0.66912300  | 1.67810900  |
| N  | 1.45663300  | 0.99069000  | 1.94853400  |
| C  | -1.14417700 | -0.67668700 | -0.11774600 |
| C  | -1.21314900 | -2.19516400 | 0.20571700  |
| C  | -2.16332000 | -2.97621000 | -0.70527900 |
| C  | -1.54405800 | -2.46944800 | 1.67381200  |
| C  | -2.41786100 | 0.08917000  | 0.27812900  |
| C  | -3.62760400 | -0.28223700 | -0.59660800 |
| C  | -2.25194200 | 1.59449400  | 0.11956800  |
| O  | -3.51421200 | -0.36034500 | -1.79619600 |
| O  | -2.63890500 | 2.40172100  | 0.93192500  |
| O  | -1.66700700 | 1.92535100  | -1.02452100 |
| C  | -1.47002200 | 3.33473400  | -1.23818700 |
| C  | -4.92622500 | -0.48481100 | 0.12723700  |
| H  | 4.28651500  | 1.04311400  | 1.50953800  |
| H  | 1.36726100  | -1.39167100 | -1.75826000 |
| H  | 3.82742900  | -1.29874900 | -2.06544300 |
| H  | -0.64484600 | 1.00475000  | 2.33986000  |
| H  | 1.76932700  | 1.54226900  | 2.73308200  |
| H  | -1.04014600 | -0.56995100 | -1.20613600 |
| H  | -0.19718300 | -2.56747600 | 0.01564700  |
| H  | -2.01722300 | -2.71960800 | -1.76011500 |
| H  | -3.21458800 | -2.78907900 | -0.45354900 |
| H  | -1.99386600 | -4.05155900 | -0.58089400 |
| H  | -0.92173700 | -1.87121400 | 2.34876700  |
| H  | -2.59815500 | -2.24904700 | 1.88911800  |
| H  | -1.38258400 | -3.52725700 | 1.90724400  |
| H  | -2.67143900 | -0.06909700 | 1.33071300  |
| H  | -2.43499700 | 3.84742100  | -1.23931500 |
| H  | -0.83716300 | 3.73993300  | -0.44430500 |
| H  | -0.98122500 | 3.42469400  | -2.20736600 |
| H  | -5.73785000 | -0.67543800 | -0.57572900 |
| H  | -4.82082000 | -1.32519700 | 0.82475500  |
| H  | -5.14018100 | 0.40463300  | 0.73252600  |
| Cl | 5.88846700  | -0.08921500 | -0.55515500 |

Compound **1b**, optimization level PCM-M11/6-311++G(2d,p)

## Conformation #21

|    |             |             |             |
|----|-------------|-------------|-------------|
| C  | 3.53203400  | 0.50184500  | 0.90631700  |
| C  | 2.16284800  | 0.28064300  | 1.06439100  |
| C  | 1.36234400  | -0.26229100 | 0.03806600  |
| C  | 1.95422800  | -0.58613800 | -1.18778700 |
| C  | 3.30400800  | -0.37323100 | -1.36194000 |
| C  | 4.06508200  | 0.16314100  | -0.31331900 |
| C  | 0.01774300  | -0.34583800 | 0.54281500  |
| C  | 0.06317300  | 0.14456600  | 1.81694700  |
| N  | 1.34784000  | 0.51849100  | 2.13724700  |
| C  | -1.18143100 | -0.86429400 | -0.20609100 |
| C  | -1.49848600 | -2.35025500 | 0.09970800  |
| C  | -1.95077100 | -2.58389700 | 1.54161500  |
| C  | -0.28807300 | -3.22730200 | -0.22231000 |
| C  | -2.39188200 | 0.04398700  | 0.04684600  |
| C  | -3.61436500 | -0.34949500 | -0.79676500 |
| C  | -2.06189600 | 1.47560000  | -0.35083100 |
| O  | -3.47056400 | -0.78229100 | -1.91556700 |
| O  | -1.41390800 | 1.77883600  | -1.32072100 |
| O  | -2.60602800 | 2.36372300  | 0.48068600  |
| C  | -2.37590300 | 3.74682200  | 0.14877100  |
| C  | -4.95566600 | -0.13430600 | -0.16002200 |
| H  | 4.14772200  | 0.91895700  | 1.69738200  |
| H  | 1.36084800  | -0.99999200 | -2.00026200 |
| H  | 3.79012800  | -0.61425900 | -2.30229000 |
| H  | -0.73316300 | 0.26467500  | 2.54231800  |
| H  | 1.63496200  | 0.91342800  | 3.01996400  |
| H  | -0.96301700 | -0.79347200 | -1.27940800 |
| H  | -2.31533200 | -2.64156400 | -0.57301800 |
| H  | -1.17353300 | -2.26544600 | 2.24723400  |
| H  | -2.87721300 | -2.05086300 | 1.78609900  |
| H  | -2.13505600 | -3.65087400 | 1.70821100  |
| H  | 0.54403700  | -2.99883900 | 0.45528100  |
| H  | -0.53989600 | -4.28712500 | -0.10615500 |
| H  | 0.05794300  | -3.06882700 | -1.25069400 |
| H  | -2.68397900 | 0.05828600  | 1.10140900  |
| H  | -2.88748400 | 4.32700700  | 0.91552500  |
| H  | -1.30272900 | 3.95185200  | 0.15615500  |
| H  | -2.78606900 | 3.96105100  | -0.84105700 |
| H  | -5.75703400 | -0.29018200 | -0.88301000 |
| H  | -5.06227900 | -0.83813900 | 0.67495100  |
| H  | -5.00249200 | 0.87524100  | 0.26453700  |
| Cl | 5.78322500  | 0.41412600  | -0.58162000 |

Compound **1b**, optimization level PCM-M11/6-311++G(2d,p)

## Conformation #22

|    |             |             |             |
|----|-------------|-------------|-------------|
| C  | 3.18371600  | -1.07877600 | -0.62423000 |
| C  | 1.83466200  | -1.39745800 | -0.46855500 |
| C  | 0.91923500  | -0.55304500 | 0.20025600  |
| C  | 1.39835300  | 0.65316700  | 0.73099900  |
| C  | 2.72800400  | 0.98516300  | 0.58586000  |
| C  | 3.59518900  | 0.11611600  | -0.08782100 |
| C  | -0.36606800 | -1.21108400 | 0.15584700  |
| C  | -0.16597400 | -2.38174500 | -0.51463800 |
| N  | 1.14823900  | -2.50218500 | -0.89190700 |
| C  | -1.68858400 | -0.75751200 | 0.72055000  |
| C  | -1.58180800 | -0.23523600 | 2.17164200  |
| C  | -0.96670700 | -1.32120600 | 3.05774700  |
| C  | -2.94705900 | 0.18200800  | 2.72498900  |
| C  | -2.41596700 | 0.21189900  | -0.24478100 |
| C  | -2.98014700 | -0.50266100 | -1.47570500 |
| C  | -1.54103300 | 1.37703800  | -0.65276200 |
| O  | -3.03461200 | -1.71005800 | -1.52162300 |
| O  | -0.92951100 | 1.45307500  | -1.69053500 |
| O  | -1.49489500 | 2.32054700  | 0.29161000  |
| C  | -0.67972500 | 3.46738600  | -0.01940700 |
| C  | -3.53064200 | 0.35337900  | -2.58626900 |
| H  | 3.87592700  | -1.73660000 | -1.14106100 |
| H  | 0.73947300  | 1.33837400  | 1.25610500  |
| H  | 3.11440600  | 1.91577300  | 0.99051400  |
| H  | -0.88863600 | -3.14958100 | -0.76010800 |
| H  | 1.53986100  | -3.27742300 | -1.40492000 |
| H  | -2.33735600 | -1.64274600 | 0.75613800  |
| H  | -0.92880700 | 0.64352000  | 2.19567800  |
| H  | -1.59374800 | -2.22314600 | 3.04035400  |
| H  | 0.03666500  | -1.59914000 | 2.71912400  |
| H  | -0.89777800 | -0.97782900 | 4.09557200  |
| H  | -2.88028400 | 0.35500100  | 3.80441000  |
| H  | -3.31558300 | 1.10743200  | 2.26979900  |
| H  | -3.69115000 | -0.60870600 | 2.55712300  |
| H  | -3.29518200 | 0.63080400  | 0.26210700  |
| H  | -1.09236500 | 3.98415600  | -0.88945000 |
| H  | -0.71340100 | 4.10581000  | 0.86270100  |
| H  | 0.34380300  | 3.14860800  | -0.23403900 |
| H  | -4.33743100 | -0.18216600 | -3.08994700 |
| H  | -3.88179100 | 1.32023600  | -2.21357700 |
| H  | -2.72414300 | 0.54467000  | -3.30148300 |
| Cl | 5.28172500  | 0.58030200  | -0.24762600 |



Compound **1b**, optimization level PCM-M11/6-311++G(2d,p)

## Conformation #23

|    |             |             |             |
|----|-------------|-------------|-------------|
| C  | -3.39592800 | 0.58583500  | 0.79148400  |
| C  | -2.03637600 | 0.85718000  | 0.95995400  |
| C  | -1.08028400 | 0.56778100  | -0.03516100 |
| C  | -1.50291300 | -0.00604100 | -1.24042300 |
| C  | -2.83963000 | -0.27820100 | -1.42428600 |
| C  | -3.75813900 | 0.02001700  | -0.40581100 |
| C  | 0.20393100  | 0.95812000  | 0.48089100  |
| C  | -0.02656200 | 1.45650300  | 1.73121600  |
| N  | -1.36893900 | 1.40123900  | 2.02305800  |
| C  | 1.53831700  | 0.79050400  | -0.20148100 |
| C  | 2.36167200  | 2.09671600  | -0.14284200 |
| C  | 1.63343200  | 3.20348000  | -0.90833100 |
| C  | 3.78132300  | 1.94145900  | -0.68981500 |
| C  | 2.31882000  | -0.40094500 | 0.40807600  |
| C  | 3.31506800  | -1.04365500 | -0.56692900 |
| C  | 1.35039200  | -1.49419100 | 0.83353300  |
| O  | 3.15065800  | -0.98911000 | -1.76195900 |
| O  | 1.18703800  | -1.87180500 | 1.96780100  |
| O  | 0.67809400  | -1.97532100 | -0.20913500 |
| C  | -0.39109000 | -2.88630700 | 0.10191000  |
| C  | 4.46704700  | -1.76983400 | 0.06952900  |
| H  | -4.13090600 | 0.80456900  | 1.56002700  |
| H  | -0.78359500 | -0.25080400 | -2.01906500 |
| H  | -3.19649400 | -0.72628100 | -2.34669500 |
| H  | 0.67237800  | 1.85291700  | 2.45788600  |
| H  | -1.78900800 | 1.70951400  | 2.88694400  |
| H  | 1.36047400  | 0.53804300  | -1.25579200 |
| H  | 2.43402900  | 2.38878400  | 0.91566200  |
| H  | 2.17969700  | 4.15008000  | -0.83367200 |
| H  | 1.56245700  | 2.93835500  | -1.97160000 |
| H  | 0.61951700  | 3.35829600  | -0.52606300 |
| H  | 3.76042100  | 1.59811000  | -1.73075300 |
| H  | 4.29909100  | 2.90623900  | -0.65821100 |
| H  | 4.38272300  | 1.23423600  | -0.10591300 |
| H  | 2.84876400  | -0.09542900 | 1.31757300  |
| H  | -1.12981400 | -2.37345900 | 0.72632000  |
| H  | -0.83048800 | -3.16869500 | -0.85437700 |
| H  | 0.00311700  | -3.75995300 | 0.62623000  |
| H  | 5.03640700  | -2.32081800 | -0.67968700 |
| H  | 5.11451800  | -1.03887500 | 0.56897300  |
| H  | 4.09393700  | -2.44788500 | 0.84620700  |
| Cl | -5.45208600 | -0.35331000 | -0.68400900 |

Compound **1b**, optimization level PCM-M11/6-311++G(2d,p)

## Conformation #37

|    |             |             |             |
|----|-------------|-------------|-------------|
| C  | 3.53440700  | -0.77789400 | -0.98127600 |
| C  | 2.14808500  | -0.62091100 | -0.99763800 |
| C  | 1.46657900  | 0.17329500  | -0.05258000 |
| C  | 2.20199600  | 0.83001100  | 0.94085800  |
| C  | 3.57194500  | 0.68438900  | 0.97337100  |
| C  | 4.21001000  | -0.11394800 | 0.01382200  |
| C  | 0.06220800  | 0.10303200  | -0.36569800 |
| C  | -0.03912400 | -0.71107300 | -1.45856700 |
| N  | 1.20777800  | -1.14587900 | -1.84103300 |
| C  | -1.02446200 | 0.81373200  | 0.40120100  |
| C  | -1.48279200 | 2.12246100  | -0.28719000 |
| C  | -0.30183300 | 3.08752200  | -0.40507500 |
| C  | -2.62773500 | 2.78864900  | 0.47939100  |
| C  | -2.21463200 | -0.09929700 | 0.79213100  |
| C  | -1.73238200 | -1.46757300 | 1.27176100  |
| C  | -3.25035100 | -0.31032400 | -0.29174800 |
| O  | -2.12729000 | -2.48730500 | 0.75256700  |
| O  | -3.04371600 | -0.30200400 | -1.48051300 |
| O  | -4.45596200 | -0.52868700 | 0.23467700  |
| C  | -5.50631000 | -0.80559800 | -0.70893700 |
| C  | -0.75241900 | -1.46432000 | 2.41201200  |
| H  | 4.05767500  | -1.38958300 | -1.70992900 |
| H  | 1.70681700  | 1.45391300  | 1.68277300  |
| H  | 4.16763300  | 1.18184100  | 1.73260500  |
| H  | -0.92370700 | -1.01902200 | -1.99896200 |
| H  | 1.39194100  | -1.76338700 | -2.61717600 |
| H  | -0.57967000 | 1.11750900  | 1.36193900  |
| H  | -1.82761400 | 1.86264900  | -1.29523700 |
| H  | 0.07344600  | 3.35419800  | 0.59283000  |
| H  | 0.52458300  | 2.64807400  | -0.97296300 |
| H  | -0.61001100 | 4.01173600  | -0.90578400 |
| H  | -2.34572400 | 2.94494000  | 1.52997000  |
| H  | -2.85583000 | 3.76785900  | 0.04526600  |
| H  | -3.55195800 | 2.19905200  | 0.46021500  |
| H  | -2.73329300 | 0.35477900  | 1.64594500  |
| H  | -5.63638200 | 0.04861300  | -1.37803300 |
| H  | -5.25290700 | -1.69486800 | -1.29130000 |
| H  | -6.40473700 | -0.97314100 | -0.11622700 |
| H  | -0.66408900 | -2.46941700 | 2.82658000  |
| H  | 0.22528700  | -1.14011600 | 2.03498800  |
| H  | -1.06360700 | -0.75365300 | 3.18448300  |
| Cl | 5.95790000  | -0.26880900 | 0.09449300  |

Compound **1b**, optimization level PCM-M11/6-311++G(2d,p)

## Conformation #44

|    |             |             |             |
|----|-------------|-------------|-------------|
| C  | -3.37976800 | -0.15715100 | 0.84540900  |
| C  | -2.03589400 | -0.34023800 | 1.17664300  |
| C  | -1.02728900 | -0.49935000 | 0.20239600  |
| C  | -1.38732600 | -0.45552500 | -1.15077100 |
| C  | -2.70815400 | -0.27651200 | -1.49652000 |
| C  | -3.67828000 | -0.13379300 | -0.49423800 |
| C  | 0.22359600  | -0.62842300 | 0.90856600  |
| C  | -0.08096100 | -0.54262600 | 2.23492500  |
| N  | -1.43391100 | -0.37425500 | 2.40573500  |
| C  | 1.60387700  | -0.81925300 | 0.33717400  |
| C  | 1.68858900  | -2.10165900 | -0.52307900 |
| C  | 1.30806300  | -3.32260700 | 0.31598700  |
| C  | 3.07440700  | -2.30354600 | -1.13796800 |
| C  | 2.09184900  | 0.42519700  | -0.45831300 |
| C  | 3.61234400  | 0.60924600  | -0.41242000 |
| C  | 1.48382500  | 1.66521100  | 0.17297000  |
| O  | 4.27229200  | 0.17660900  | 0.50141400  |
| O  | 1.88231400  | 2.16914100  | 1.19524700  |
| O  | 0.41391100  | 2.08872100  | -0.49183700 |
| C  | -0.42085300 | 3.02651600  | 0.20989600  |
| C  | 4.20749800  | 1.39595800  | -1.54671700 |
| H  | -4.15052200 | -0.03313100 | 1.60011100  |
| H  | -0.63694700 | -0.54099400 | -1.93311400 |
| H  | -3.01030900 | -0.23706400 | -2.53856800 |
| H  | 0.58216400  | -0.59169600 | 3.09021100  |
| H  | -1.90262500 | -0.28515500 | 3.29449400  |
| H  | 2.30024500  | -0.92703200 | 1.17992800  |
| H  | 0.96100800  | -2.00441400 | -1.34120000 |
| H  | 1.99078300  | -3.42028800 | 1.17091700  |
| H  | 0.28747500  | -3.24313700 | 0.70345900  |
| H  | 1.38152500  | -4.23796400 | -0.28117700 |
| H  | 3.10288200  | -3.24552600 | -1.69607000 |
| H  | 3.34321400  | -1.50512400 | -1.84032700 |
| H  | 3.84165900  | -2.34464800 | -0.35549400 |
| H  | 1.75936100  | 0.37768400  | -1.50224900 |
| H  | 0.11980100  | 3.96010300  | 0.38270000  |
| H  | -1.28828700 | 3.19057900  | -0.42940000 |
| H  | -0.72207300 | 2.58576800  | 1.16628000  |
| H  | 5.26411700  | 1.59379900  | -1.36359800 |
| H  | 4.08889700  | 0.82623000  | -2.47639800 |
| H  | 3.65874500  | 2.33632100  | -1.67550100 |
| Cl | -5.34911800 | 0.09653200  | -0.98455200 |

Compound **1b**, optimization level PCM- $\omega$ B97-XD/6-311++G(2d,p)

## Conformation #1

|    |             |             |             |
|----|-------------|-------------|-------------|
| C  | -3.76386700 | -0.69444500 | -0.17224600 |
| C  | -2.43410900 | -1.09763000 | -0.06071400 |
| C  | -1.40938400 | -0.21933500 | 0.34959700  |
| C  | -1.73266200 | 1.10777200  | 0.65133300  |
| C  | -3.04292400 | 1.52540600  | 0.54354800  |
| C  | -4.03175100 | 0.62016700  | 0.13524900  |
| C  | -0.18276300 | -0.96668700 | 0.35478800  |
| C  | -0.50979600 | -2.22858200 | -0.04716600 |
| N  | -1.85829700 | -2.31466800 | -0.29575200 |
| C  | 1.18135500  | -0.39393600 | 0.64012000  |
| C  | 2.16371300  | -1.44478300 | 1.19914100  |
| C  | 1.66795000  | -1.93846300 | 2.56104600  |
| C  | 3.59628700  | -0.93222400 | 1.33869000  |
| C  | 1.62420400  | 0.37859100  | -0.64115300 |
| C  | 1.82486500  | -0.55267300 | -1.83789900 |
| C  | 2.79559500  | 1.32782600  | -0.48509400 |
| O  | 2.69630300  | -1.39026300 | -1.84259900 |
| O  | 3.68656700  | 1.46726700  | -1.28615000 |
| O  | 2.67642600  | 2.06146600  | 0.61779100  |
| C  | 3.71564600  | 3.01682500  | 0.85712900  |
| C  | 0.86089400  | -0.38298100 | -2.97439500 |
| H  | -4.54558000 | -1.37406600 | -0.48499300 |
| H  | -0.96894100 | 1.80804400  | 0.97065300  |
| H  | -3.31601400 | 2.54701900  | 0.77239200  |
| H  | 0.11768700  | -3.09594500 | -0.17883900 |
| H  | -2.34051800 | -3.14818000 | -0.58402700 |
| H  | 1.06314600  | 0.37475200  | 1.41095700  |
| H  | 2.18823300  | -2.29349800 | 0.50988600  |
| H  | 1.67269800  | -1.11905200 | 3.28711700  |
| H  | 0.65447900  | -2.33826700 | 2.51035000  |
| H  | 2.32400900  | -2.72457500 | 2.94150300  |
| H  | 3.63733600  | -0.04272000 | 1.97351000  |
| H  | 4.21823400  | -1.70055400 | 1.80369900  |
| H  | 4.04174600  | -0.69650200 | 0.37159100  |
| H  | 0.78900100  | 1.04611800  | -0.87898000 |
| H  | 4.67502800  | 2.50908300  | 0.95535000  |
| H  | 3.76333500  | 3.73842200  | 0.04243900  |
| H  | 3.45016600  | 3.50992600  | 1.78785800  |
| H  | 1.05358800  | -1.11095800 | -3.75976700 |
| H  | -0.16007200 | -0.49248600 | -2.59648700 |
| H  | 0.94581600  | 0.63256600  | -3.37208400 |
| Cl | -5.68642300 | 1.19510000  | 0.01199800  |

Compound **1b**, optimization level PCM- $\omega$ B97-XD /6-311++G(2d,p)

Conformation #2

|    |             |             |             |
|----|-------------|-------------|-------------|
| C  | -3.47214300 | -0.08286800 | 0.99938500  |
| C  | -2.10116600 | 0.12596900  | 1.14345300  |
| C  | -1.24541700 | 0.33049200  | 0.04071100  |
| C  | -1.78822900 | 0.31991300  | -1.24790800 |
| C  | -3.14219000 | 0.11324100  | -1.41089000 |
| C  | -3.95789100 | -0.08276500 | -0.28813200 |
| C  | 0.08343300  | 0.50415500  | 0.55688000  |
| C  | -0.02506700 | 0.39558400  | 1.91377700  |
| N  | -1.33161100 | 0.17209400  | 2.27201300  |
| C  | 1.32391900  | 0.74163000  | -0.25980600 |
| C  | 1.73895100  | 2.23363600  | -0.33448000 |
| C  | 2.09112700  | 2.85235700  | 1.01682400  |
| C  | 0.65201800  | 3.05319500  | -1.02784700 |
| C  | 2.47920600  | -0.15492100 | 0.21778000  |
| C  | 3.67710100  | -0.15667000 | -0.74653400 |
| C  | 2.04619900  | -1.60303400 | 0.39940200  |
| O  | 3.52442200  | -0.01693800 | -1.93615600 |
| O  | 2.31180400  | -2.26990400 | 1.36924200  |
| O  | 1.36352200  | -2.05164400 | -0.64538900 |
| C  | 0.86783400  | -3.39194100 | -0.55363500 |
| C  | 5.02313700  | -0.35550200 | -0.11565800 |
| H  | -4.12124700 | -0.23895600 | 1.85102100  |
| H  | -1.15866700 | 0.47367100  | -2.11648300 |
| H  | -3.58245600 | 0.10121600  | -2.39922000 |
| H  | 0.73874100  | 0.45244400  | 2.67368200  |
| H  | -1.66011500 | 0.04887400  | 3.21387600  |
| H  | 1.10456800  | 0.43283200  | -1.28465300 |
| H  | 2.63168500  | 2.27551500  | -0.96650000 |
| H  | 1.22442200  | 2.86040500  | 1.68267300  |
| H  | 2.90329400  | 2.32507400  | 1.52274300  |
| H  | 2.41353700  | 3.88680100  | 0.87819200  |
| H  | -0.26777700 | 3.06356300  | -0.43649600 |
| H  | 0.97802600  | 4.08741300  | -1.16011700 |
| H  | 0.41465900  | 2.64486900  | -2.01356800 |
| H  | 2.83899800  | 0.15200000  | 1.19999900  |
| H  | 1.69319600  | -4.09462000 | -0.44487500 |
| H  | 0.19168400  | -3.48206900 | 0.29607000  |
| H  | 0.33520400  | -3.56999700 | -1.48327000 |
| H  | 5.78721900  | -0.50727300 | -0.87497800 |
| H  | 5.26343000  | 0.53079800  | 0.47915200  |
| H  | 4.99456000  | -1.20183600 | 0.57507700  |
| Cl | -5.67674100 | -0.34072500 | -0.54223100 |

Compound **1b**, optimization level PCM- $\omega$ B97-XD /6-311++G(2d,p)

Conformation #3

|    |             |             |             |
|----|-------------|-------------|-------------|
| C  | -3.81497700 | 0.48130800  | 0.53157000  |
| C  | -2.49460800 | 0.92810400  | 0.51615100  |
| C  | -1.49641500 | 0.31226700  | -0.26784000 |
| C  | -1.83705000 | -0.79227200 | -1.05561600 |
| C  | -3.13821900 | -1.25059000 | -1.05038400 |
| C  | -4.10063200 | -0.60783900 | -0.26009700 |
| C  | -0.27284000 | 1.03040300  | -0.04289400 |
| C  | -0.57537700 | 2.01788600  | 0.84836900  |
| N  | -1.90613600 | 1.96401700  | 1.18564300  |
| C  | 1.07282600  | 0.65841700  | -0.60871400 |
| C  | 2.01252300  | 1.87421800  | -0.75374000 |
| C  | 1.43486400  | 2.84990800  | -1.78259900 |
| C  | 3.44064700  | 1.50621100  | -1.15253200 |
| C  | 1.60223000  | -0.54569000 | 0.22549400  |
| C  | 1.90336200  | -0.16537400 | 1.67635700  |
| C  | 2.70684900  | -1.32409600 | -0.46426800 |
| O  | 2.75461300  | 0.64609300  | 1.95713300  |
| O  | 2.67908500  | -1.61280100 | -1.63455800 |
| O  | 3.66069200  | -1.72109200 | 0.37109400  |
| C  | 4.71068600  | -2.51405100 | -0.19656500 |
| C  | 1.04571700  | -0.82535000 | 2.71556100  |
| H  | -4.57628400 | 0.96070300  | 1.13288200  |
| H  | -1.09374300 | -1.28840000 | -1.66952300 |
| H  | -3.42439800 | -2.10289000 | -1.65234400 |
| H  | 0.05834000  | 2.77634800  | 1.28016900  |
| H  | -2.36973400 | 2.60068400  | 1.81004900  |
| H  | 0.91534100  | 0.25149000  | -1.61399100 |
| H  | 2.06761100  | 2.38198300  | 0.21316300  |
| H  | 1.40532700  | 2.38463600  | -2.77313300 |
| H  | 0.42216700  | 3.16463500  | -1.52741900 |
| H  | 2.06014300  | 3.74288200  | -1.85222200 |
| H  | 3.45826000  | 0.95666400  | -2.09717100 |
| H  | 4.03082100  | 2.41631400  | -1.28328000 |
| H  | 3.93635300  | 0.90625300  | -0.38786800 |
| H  | 0.77963300  | -1.26844800 | 0.24613800  |
| H  | 5.22867000  | -1.94916300 | -0.97093200 |
| H  | 5.38382600  | -2.73743700 | 0.62600200  |
| H  | 4.30475500  | -3.43232200 | -0.61926400 |
| H  | -0.00353800 | -0.59540800 | 2.50544700  |
| H  | 1.15391100  | -1.91119100 | 2.64345900  |
| H  | 1.31308900  | -0.48536600 | 3.71391300  |
| Cl | -5.74472000 | -1.22461500 | -0.28485000 |

Compound **1b**, optimization level PCM- $\omega$ B97-XD /6-311++G(2d,p)

## Conformation #5

|    |             |             |             |
|----|-------------|-------------|-------------|
| C  | 3.51070500  | 0.43440300  | 0.86771900  |
| C  | 2.14079700  | 0.25584200  | 1.05521700  |
| C  | 1.30199500  | -0.28135700 | 0.05638300  |
| C  | 1.86178500  | -0.64724000 | -1.17188700 |
| C  | 3.21504400  | -0.47742300 | -1.37657100 |
| C  | 4.01354600  | 0.05742600  | -0.35635900 |
| C  | -0.03054200 | -0.31511600 | 0.59131200  |
| C  | 0.05944200  | 0.19378400  | 1.85545100  |
| N  | 1.35778300  | 0.53489100  | 2.14017000  |
| C  | -1.25636500 | -0.81428800 | -0.12333300 |
| C  | -1.63150800 | -2.27450100 | 0.23440000  |
| C  | -2.01427400 | -2.47061100 | 1.69952800  |
| C  | -0.50777000 | -3.22944400 | -0.16264400 |
| C  | -2.43754900 | 0.15935700  | 0.08863100  |
| C  | -3.70379700 | -0.27134500 | -0.66220300 |
| C  | -2.03323300 | 1.55670600  | -0.35002600 |
| O  | -4.73447700 | -0.42793500 | -0.04820100 |
| O  | -1.51639600 | 1.82263500  | -1.40700000 |
| O  | -2.33116000 | 2.46150000  | 0.57601700  |
| C  | -1.98118100 | 3.81737200  | 0.26782700  |
| C  | -3.61352700 | -0.49783600 | -2.14451300 |
| H  | 4.14611200  | 0.84730100  | 1.64014400  |
| H  | 1.24648700  | -1.06246800 | -1.96143400 |
| H  | 3.66814100  | -0.75391900 | -2.31943200 |
| H  | -0.71162000 | 0.35125400  | 2.59334400  |
| H  | 1.67311200  | 0.93690700  | 3.00573700  |
| H  | -1.02674600 | -0.79962400 | -1.19309700 |
| H  | -2.50670900 | -2.53635800 | -0.37155300 |
| H  | -2.29353700 | -3.51193900 | 1.87400600  |
| H  | -1.17417400 | -2.23576900 | 2.35790300  |
| H  | -2.86379700 | -1.85019600 | 1.99318900  |
| H  | 0.39208900  | -3.04185300 | 0.42913700  |
| H  | -0.81094500 | -4.26529900 | 0.00461900  |
| H  | -0.24665000 | -3.11976800 | -1.21831300 |
| H  | -2.71443700 | 0.20723900  | 1.14030600  |
| H  | -0.90575900 | 3.90052300  | 0.11492400  |
| H  | -2.50741500 | 4.14873700  | -0.62654900 |
| H  | -2.28978500 | 4.40113000  | 1.13008900  |
| H  | -3.08560700 | 0.32491900  | -2.62827500 |
| H  | -3.03395100 | -1.40474100 | -2.33724000 |
| H  | -4.61109900 | -0.61749700 | -2.56136400 |
| Cl | 5.73215600  | 0.25371900  | -0.66043800 |

Compound **1b**, optimization level PCM- $\omega$ B97-XD /6-311++G(2d,p)

Conformation #7

|    |             |             |             |
|----|-------------|-------------|-------------|
| C  | -3.38065100 | -0.34181400 | 0.86583000  |
| C  | -2.03702400 | -0.58309100 | 1.14970400  |
| C  | -1.01444400 | -0.47996400 | 0.17941000  |
| C  | -1.37853700 | -0.11351200 | -1.12347200 |
| C  | -2.70112200 | 0.13289100  | -1.42336000 |
| C  | -3.67913900 | 0.01462400  | -0.42764300 |
| C  | 0.22681200  | -0.78844300 | 0.84754300  |
| C  | -0.10282400 | -1.04881400 | 2.14576100  |
| N  | -1.45398800 | -0.93734500 | 2.33361300  |
| C  | 1.63983200  | -0.81628900 | 0.32718200  |
| C  | 2.00369800  | -2.09089400 | -0.47437400 |
| C  | 1.19155900  | -2.28707300 | -1.75241500 |
| C  | 1.90635400  | -3.32619500 | 0.41783700  |
| C  | 1.97978400  | 0.47809600  | -0.45289200 |
| C  | 3.45229900  | 0.54348400  | -0.87573100 |
| C  | 1.63171800  | 1.68919000  | 0.39488500  |
| O  | 3.72544400  | 0.72636500  | -2.04038900 |
| O  | 2.06942000  | 1.90552400  | 1.49822000  |
| O  | 0.77389500  | 2.48705500  | -0.23016500 |
| C  | 0.33079700  | 3.63654200  | 0.50224800  |
| C  | 4.51148900  | 0.36377000  | 0.17398000  |
| H  | -4.14820800 | -0.42851900 | 1.62380300  |
| H  | -0.63947400 | -0.02324700 | -1.90811800 |
| H  | -2.99084000 | 0.41678300  | -2.42644600 |
| H  | 0.54521300  | -1.30825800 | 2.96882200  |
| H  | -1.93211400 | -1.07021600 | 3.20770000  |
| H  | 2.28169400  | -0.81724300 | 1.21347800  |
| H  | 3.05472000  | -1.98876900 | -0.76913400 |
| H  | 0.13406400  | -2.44102000 | -1.52594100 |
| H  | 1.27724200  | -1.43789600 | -2.43409800 |
| H  | 1.54954400  | -3.17002100 | -2.28647400 |
| H  | 0.87175000  | -3.50707500 | 0.72068800  |
| H  | 2.26201500  | -4.21064600 | -0.11528300 |
| H  | 2.50749800  | -3.21086400 | 1.32362900  |
| H  | 1.40435800  | 0.54130200  | -1.37315400 |
| H  | -0.16861100 | 3.32530400  | 1.41921700  |
| H  | 1.17566600  | 4.28088300  | 0.74244500  |
| H  | -0.36548700 | 4.14945700  | -0.15474600 |
| H  | 4.54433600  | -0.68718800 | 0.47475100  |
| H  | 5.48157300  | 0.64710200  | -0.22867700 |
| H  | 4.27206100  | 0.94525300  | 1.06487200  |
| Cl | -5.35133900 | 0.33586500  | -0.85534800 |



Compound **1b**, optimization level PCM- $\omega$ B97-XD /6-311++G(2d,p)

## Conformation #8

|    |             |             |             |
|----|-------------|-------------|-------------|
| C  | 3.43864100  | -0.02519100 | 0.84608700  |
| C  | 2.10778500  | 0.22657400  | 1.17700300  |
| C  | 1.08860500  | 0.37215900  | 0.20839200  |
| C  | 1.44133300  | 0.24982200  | -1.14232200 |
| C  | 2.75121300  | -0.00255900 | -1.48985700 |
| C  | 3.72698100  | -0.13422800 | -0.49358800 |
| C  | -0.14042600 | 0.60909600  | 0.92569300  |
| C  | 0.19152000  | 0.58936000  | 2.24880200  |
| N  | 1.53413000  | 0.36999000  | 2.40858800  |
| C  | -1.54158600 | 0.82444900  | 0.41697300  |
| C  | -1.81601800 | 2.25998500  | -0.10108700 |
| C  | -0.97175300 | 2.67609000  | -1.30393600 |
| C  | -1.66006700 | 3.27248800  | 1.03159400  |
| C  | -1.94999200 | -0.24519400 | -0.61408800 |
| C  | -3.45983900 | -0.24737100 | -0.90590100 |
| C  | -1.57110700 | -1.65015400 | -0.16758600 |
| O  | -4.26528300 | 0.08113800  | -0.06880200 |
| O  | -0.93597700 | -2.42494900 | -0.83918200 |
| O  | -2.04078100 | -1.92816300 | 1.04172600  |
| C  | -1.70182400 | -3.21357900 | 1.57395600  |
| C  | -3.85298500 | -0.69083500 | -2.28413200 |
| H  | 4.20439200  | -0.13157400 | 1.60333000  |
| H  | 0.70279800  | 0.35384800  | -1.92602900 |
| H  | 3.03272100  | -0.09917900 | -2.53011400 |
| H  | -0.44870400 | 0.71525900  | 3.10841700  |
| H  | 2.01154400  | 0.30402900  | 3.29062800  |
| H  | -2.20699500 | 0.68335500  | 1.27223600  |
| H  | -2.86634200 | 2.27874300  | -0.40869700 |
| H  | -1.26878500 | 3.67308200  | -1.63741100 |
| H  | 0.08963900  | 2.71384000  | -1.04769900 |
| H  | -1.09421500 | 2.00197300  | -2.15492800 |
| H  | -0.62096200 | 3.32677400  | 1.36714700  |
| H  | -1.95887200 | 4.26865800  | 0.69716000  |
| H  | -2.27824000 | 3.00386600  | 1.89227200  |
| H  | -1.43176100 | -0.10579100 | -1.56177100 |
| H  | -0.61958600 | -3.30970800 | 1.65706100  |
| H  | -2.16348900 | -3.25390200 | 2.55625300  |
| H  | -2.09418300 | -4.00363500 | 0.93465400  |
| H  | -3.52397900 | 0.06852000  | -2.99986900 |
| H  | -3.33595000 | -1.61721200 | -2.54643900 |
| H  | -4.93054500 | -0.82167100 | -2.35567600 |
| Cl | 5.38329600  | -0.45228700 | -0.98215200 |

Compound **1b**, optimization level PCM- $\omega$ B97-XD /6-311++G(2d,p)

Conformation #9

|    |             |             |             |
|----|-------------|-------------|-------------|
| C  | 3.49051500  | -0.07092200 | 0.99274300  |
| C  | 2.11824900  | -0.27043800 | 1.13741900  |
| C  | 1.24042900  | -0.33159300 | 0.03482700  |
| C  | 1.76212000  | -0.18357100 | -1.25419400 |
| C  | 3.11697200  | 0.01610300  | -1.41743000 |
| C  | 3.95493300  | 0.06776400  | -0.29508900 |
| C  | -0.08234300 | -0.54009200 | 0.55394800  |
| C  | 0.05081900  | -0.58985100 | 1.91218600  |
| N  | 1.36687700  | -0.43266400 | 2.26767800  |
| C  | -1.33984700 | -0.66302800 | -0.26138500 |
| C  | -1.78948000 | -2.12562200 | -0.50192300 |
| C  | -2.18667400 | -2.86689900 | 0.77237000  |
| C  | -0.71285600 | -2.89688100 | -1.26254100 |
| C  | -2.46452400 | 0.19933300  | 0.35650700  |
| C  | -3.77438300 | 0.12611000  | -0.43984800 |
| C  | -2.03287300 | 1.64526500  | 0.53930600  |
| O  | -4.77611300 | -0.27737100 | 0.10534200  |
| O  | -2.26533500 | 2.28890900  | 1.53263600  |
| O  | -1.38686300 | 2.12406300  | -0.51748100 |
| C  | -0.92315900 | 3.47602700  | -0.42331200 |
| C  | -3.77087900 | 0.55618400  | -1.87946100 |
| H  | 4.15637500  | -0.02550000 | 1.84443700  |
| H  | 1.11637200  | -0.22531100 | -2.12352500 |
| H  | 3.54113400  | 0.13317000  | -2.40592200 |
| H  | -0.70023600 | -0.72082500 | 2.67547800  |
| H  | 1.71315500  | -0.42311000 | 3.21126600  |
| H  | -1.11766400 | -0.24177400 | -1.24527200 |
| H  | -2.67372500 | -2.08150500 | -1.14925700 |
| H  | -1.33810700 | -2.94917400 | 1.45633400  |
| H  | -3.00641300 | -2.37481000 | 1.30010100  |
| H  | -2.51548100 | -3.87897800 | 0.52657400  |
| H  | 0.19177100  | -3.00322900 | -0.65788900 |
| H  | -1.06802100 | -3.89801000 | -1.51646000 |
| H  | -0.44005000 | -2.38888600 | -2.19116600 |
| H  | -2.71161200 | -0.15626800 | 1.35550400  |
| H  | -0.22666000 | 3.57448800  | 0.40858300  |
| H  | -0.42147800 | 3.67802000  | -1.36519400 |
| H  | -1.76346500 | 4.15514700  | -0.28375200 |
| H  | -4.75172800 | 0.38456100  | -2.31686600 |
| H  | -3.51221100 | 1.61504300  | -1.94780900 |
| H  | -3.01166600 | 0.00970000  | -2.44283100 |
| Cl | 5.67387800  | 0.32198600  | -0.55028200 |

Compound **1b**, optimization level PCM- $\omega$ B97-XD /6-311++G(2d,p)

Conformation #14

|    |             |             |             |
|----|-------------|-------------|-------------|
| C  | -3.43440600 | -0.08959800 | 1.18311300  |
| C  | -2.07392500 | 0.21519800  | 1.19258900  |
| C  | -1.32902200 | 0.40221800  | 0.00851700  |
| C  | -1.97855900 | 0.27667900  | -1.22438100 |
| C  | -3.32436500 | -0.02317400 | -1.25374700 |
| C  | -4.02655700 | -0.20109300 | -0.05385200 |
| C  | 0.02271600  | 0.69694700  | 0.39694300  |
| C  | 0.03452600  | 0.67762200  | 1.76117100  |
| N  | -1.21799200 | 0.38992900  | 2.24350000  |
| C  | 1.16768200  | 0.96047200  | -0.54535400 |
| C  | 1.96337200  | 2.23421200  | -0.18018300 |
| C  | 1.04803800  | 3.45553200  | -0.27029900 |
| C  | 3.18718600  | 2.43500100  | -1.07328600 |
| C  | 2.05698600  | -0.28936900 | -0.78472000 |
| C  | 1.16424300  | -1.47112400 | -1.19250700 |
| C  | 2.99715900  | -0.65074500 | 0.34700600  |
| O  | 0.74674000  | -1.51910900 | -2.32642100 |
| O  | 2.95373900  | -0.24520100 | 1.48054200  |
| O  | 3.91733300  | -1.51521600 | -0.08630700 |
| C  | 4.85634100  | -1.98354300 | 0.88865400  |
| C  | 0.81059100  | -2.50329100 | -0.16209900 |
| H  | -3.99664300 | -0.23200200 | 2.09666200  |
| H  | -1.43477300 | 0.40315700  | -2.15308700 |
| H  | -3.84471400 | -0.12583500 | -2.19688100 |
| H  | 0.85678400  | 0.83833100  | 2.43826000  |
| H  | -1.46098700 | 0.32448400  | 3.21671100  |
| H  | 0.72548900  | 1.15147600  | -1.53020600 |
| H  | 2.30652900  | 2.13504300  | 0.85290700  |
| H  | 0.70990600  | 3.60604900  | -1.30075200 |
| H  | 0.16573400  | 3.34478000  | 0.36236300  |
| H  | 1.57991900  | 4.35675300  | 0.04269100  |
| H  | 2.90343200  | 2.43012800  | -2.13094000 |
| H  | 3.65425700  | 3.39858400  | -0.85885300 |
| H  | 3.94928200  | 1.66695000  | -0.92404300 |
| H  | 2.68274300  | -0.10081200 | -1.65861300 |
| H  | 4.33552700  | -2.49741300 | 1.69632200  |
| H  | 5.50915400  | -2.67131300 | 0.35904000  |
| H  | 5.42850500  | -1.14925800 | 1.29278800  |
| H  | 0.03039300  | -3.15956000 | -0.54116100 |
| H  | 1.70005900  | -3.09450100 | 0.07393500  |
| H  | 0.48613100  | -2.01580000 | 0.75986200  |
| Cl | -5.73854900 | -0.58554100 | -0.13937600 |

Compound **1b**, optimization level PCM- $\omega$ B97-XD/6-311++G(2d,p)

## Conformation #15

|    |             |             |             |
|----|-------------|-------------|-------------|
| C  | -3.37935200 | -0.44388100 | 0.78298400  |
| C  | -2.04617200 | -0.74376000 | 1.06093900  |
| C  | -0.99823200 | -0.51599800 | 0.14017400  |
| C  | -1.32444100 | 0.03923500  | -1.10445300 |
| C  | -2.63610000 | 0.34481800  | -1.39767200 |
| C  | -3.64039900 | 0.09903300  | -0.45252100 |
| C  | 0.22348600  | -0.93331100 | 0.78430400  |
| C  | -0.14130900 | -1.37512200 | 2.02239700  |
| N  | -1.49634100 | -1.27373800 | 2.19374100  |
| C  | 1.64666100  | -0.90951500 | 0.29190100  |
| C  | 2.00974800  | -2.08050700 | -0.65658200 |
| C  | 1.20097500  | -2.11920900 | -1.95175300 |
| C  | 1.89943200  | -3.41478200 | 0.07809400  |
| C  | 2.02885500  | 0.45522800  | -0.31491300 |
| C  | 3.54352700  | 0.60595700  | -0.51943700 |
| C  | 1.59121000  | 1.58526900  | 0.60457600  |
| O  | 4.33408600  | 0.08807900  | 0.23168300  |
| O  | 1.93755400  | 1.69888800  | 1.75311500  |
| O  | 0.78105600  | 2.43645700  | -0.01568700 |
| C  | 0.26478200  | 3.51070200  | 0.77986700  |
| C  | 3.96262000  | 1.44054000  | -1.69356400 |
| H  | -4.16731600 | -0.62598100 | 1.50213400  |
| H  | -0.56316700 | 0.23318800  | -1.84805200 |
| H  | -2.89719700 | 0.77443500  | -2.35580700 |
| H  | 0.48334300  | -1.75965800 | 2.81393000  |
| H  | -1.99699100 | -1.52685100 | 3.02768900  |
| H  | 2.28169900  | -1.02541300 | 1.17416600  |
| H  | 3.06271200  | -1.94477300 | -0.92425600 |
| H  | 1.29144800  | -1.19596800 | -2.52899400 |
| H  | 1.55638000  | -2.93369500 | -2.58706300 |
| H  | 0.14128000  | -2.29231200 | -1.74940400 |
| H  | 0.86200500  | -3.62586600 | 0.35101700  |
| H  | 2.25375800  | -4.23057500 | -0.55626600 |
| H  | 2.49542700  | -3.41390400 | 0.99446100  |
| H  | 1.54279100  | 0.61470000  | -1.27608500 |
| H  | 1.07912100  | 4.12944000  | 1.15502200  |
| H  | -0.37525900 | 4.08387200  | 0.11545800  |
| H  | -0.31126900 | 3.11271400  | 1.61472000  |
| H  | 5.03525800  | 1.62092000  | -1.67696900 |
| H  | 3.68990600  | 0.91130800  | -2.61162200 |
| H  | 3.41589100  | 2.38693100  | -1.69993100 |
| Cl | -5.29757400 | 0.50400500  | -0.86878100 |

Compound **1b**, optimization level PCM- $\omega$ B97-XD/6-311++G(2d,p)

## Conformation #17

|    |             |             |             |
|----|-------------|-------------|-------------|
| C  | 3.12387000  | 0.07031600  | 1.20215300  |
| C  | 1.76892000  | 0.34727500  | 1.37346300  |
| C  | 0.87936800  | 0.52824100  | 0.28994600  |
| C  | 1.39330100  | 0.43307400  | -1.00952500 |
| C  | 2.73262500  | 0.16100700  | -1.19956300 |
| C  | 3.57337200  | -0.01738000 | -0.09502100 |
| C  | -0.42135400 | 0.79098700  | 0.85466000  |
| C  | -0.25399100 | 0.76192500  | 2.20678700  |
| N  | 1.05236800  | 0.49449400  | 2.52746500  |
| C  | -1.73619400 | 1.04007700  | 0.16188700  |
| C  | -1.64576400 | 2.07202700  | -0.98739500 |
| C  | -0.94083800 | 3.34183700  | -0.50894600 |
| C  | -3.02498700 | 2.43439000  | -1.54206600 |
| C  | -2.43632200 | -0.28064100 | -0.25920300 |
| C  | -3.10254800 | -1.01453200 | 0.90780700  |
| C  | -1.52987500 | -1.16719900 | -1.08793900 |
| O  | -3.19863500 | -0.50780900 | 2.00068800  |
| O  | -1.39067300 | -1.05647200 | -2.28229200 |
| O  | -0.87379000 | -2.05282000 | -0.34696200 |
| C  | 0.07012300  | -2.88779700 | -1.02754900 |
| C  | -3.70987800 | -2.36164600 | 0.61309300  |
| H  | 3.78883800  | -0.06822600 | 2.04458400  |
| H  | 0.75412800  | 0.55488600  | -1.87388700 |
| H  | 3.13841900  | 0.08170300  | -2.19951500 |
| H  | -0.99174400 | 0.90433100  | 2.98029500  |
| H  | 1.41977700  | 0.42642700  | 3.46042700  |
| H  | -2.40294900 | 1.47326100  | 0.91350400  |
| H  | -1.06180500 | 1.64351000  | -1.80678000 |
| H  | -0.90028600 | 4.07949500  | -1.31339200 |
| H  | -1.48547500 | 3.78844900  | 0.32946100  |
| H  | 0.07978300  | 3.14419300  | -0.17916000 |
| H  | -3.68856400 | 2.77371100  | -0.74019100 |
| H  | -2.93556200 | 3.24635200  | -2.26686000 |
| H  | -3.50975400 | 1.60229300  | -2.05560200 |
| H  | -3.27185400 | -0.03550500 | -0.92068800 |
| H  | 0.86520300  | -2.27590000 | -1.45303600 |
| H  | 0.46925500  | -3.55419200 | -0.26832000 |
| H  | -0.42561800 | -3.45596500 | -1.81374300 |
| H  | -4.55657700 | -2.53287300 | 1.27565500  |
| H  | -4.02190200 | -2.44785400 | -0.42888500 |
| H  | -2.95616400 | -3.12963800 | 0.79983900  |
| Cl | 5.27012300  | -0.36793400 | -0.38252700 |

Compound **1b**, optimization level PCM- $\omega$ B97-XD/6-311++G(2d,p)

## Conformation #20

|    |             |             |             |
|----|-------------|-------------|-------------|
| C  | 3.61362300  | 0.35639200  | 0.85142900  |
| C  | 2.23579200  | 0.26589500  | 1.04391800  |
| C  | 1.37269500  | -0.29423100 | 0.07880600  |
| C  | 1.91323300  | -0.77894500 | -1.11618500 |
| C  | 3.27472400  | -0.69843100 | -1.32408600 |
| C  | 4.09767400  | -0.13427000 | -0.33995300 |
| C  | 0.03793800  | -0.21624700 | 0.60236700  |
| C  | 0.14984800  | 0.36762700  | 1.83045300  |
| N  | 1.46546500  | 0.66060700  | 2.10115200  |
| C  | -1.19045800 | -0.73218400 | -0.09475100 |
| C  | -1.37799500 | -2.24636500 | 0.20260200  |
| C  | -2.37057000 | -2.93846200 | -0.73071900 |
| C  | -1.71971700 | -2.54809500 | 1.66086800  |
| C  | -2.43208200 | 0.12636400  | 0.21820200  |
| C  | -3.58240000 | -0.06978100 | -0.78646900 |
| C  | -2.12788000 | 1.61910500  | 0.21370700  |
| O  | -3.36896100 | -0.16139100 | -1.97072200 |
| O  | -2.49330200 | 2.37806100  | 1.07848600  |
| O  | -1.44814500 | 1.99118200  | -0.86108500 |
| C  | -1.07851600 | 3.37251400  | -0.93065600 |
| C  | -4.96372700 | -0.08244600 | -0.20188400 |
| H  | 4.26982100  | 0.78797500  | 1.59574300  |
| H  | 1.27633000  | -1.21596900 | -1.87673700 |
| H  | 3.71492000  | -1.06706700 | -2.24118900 |
| H  | -0.61444600 | 0.61031600  | 2.55225100  |
| H  | 1.79817000  | 1.10794000  | 2.93736900  |
| H  | -1.01672700 | -0.63832000 | -1.17048500 |
| H  | -0.39398400 | -2.68389900 | 0.00178200  |
| H  | -2.16762800 | -2.70862100 | -1.77837100 |
| H  | -3.40367400 | -2.65110000 | -0.51623300 |
| H  | -2.30864600 | -4.02115200 | -0.59815400 |
| H  | -1.01975100 | -2.07075900 | 2.34900100  |
| H  | -2.73036800 | -2.21671600 | 1.91636900  |
| H  | -1.68090300 | -3.62540600 | 1.83653700  |
| H  | -2.81009300 | -0.07956800 | 1.21921400  |
| H  | -1.96676900 | 4.00316400  | -0.93735700 |
| H  | -0.44764000 | 3.63267400  | -0.08093300 |
| H  | -0.52733300 | 3.48057500  | -1.86024500 |
| H  | -5.71535000 | -0.14151100 | -0.98598200 |
| H  | -5.06270500 | -0.93306700 | 0.47799200  |
| H  | -5.11206700 | 0.81871300  | 0.39963300  |
| Cl | 5.82533900  | -0.05211100 | -0.64632900 |

Compound **1b**, optimization level PCM- $\omega$ B97-XD/6-311++G(2d,p)

## Conformation #21

|    |             |             |             |
|----|-------------|-------------|-------------|
| C  | 3.51677500  | 0.50291700  | 0.87434500  |
| C  | 2.14833700  | 0.29748200  | 1.04555600  |
| C  | 1.33607300  | -0.27384800 | 0.04354500  |
| C  | 1.92130300  | -0.64647800 | -1.17066600 |
| C  | 3.27344600  | -0.45041200 | -1.35919700 |
| C  | 4.04513900  | 0.11784800  | -0.33644900 |
| C  | -0.00349400 | -0.32887400 | 0.55854200  |
| C  | 0.05691500  | 0.20110200  | 1.81563900  |
| N  | 1.34364700  | 0.57607700  | 2.11453200  |
| C  | -1.20807600 | -0.86693300 | -0.16411100 |
| C  | -1.55068700 | -2.33020600 | 0.21635800  |
| C  | -1.92621000 | -2.51666800 | 1.68522000  |
| C  | -0.40334100 | -3.26458500 | -0.16303300 |
| C  | -2.41275200 | 0.07316700  | 0.00865800  |
| C  | -3.61208700 | -0.32472900 | -0.86610600 |
| C  | -2.03817900 | 1.49382900  | -0.38776100 |
| O  | -3.45153800 | -0.77218200 | -1.97604000 |
| O  | -1.46092700 | 1.78870800  | -1.40282800 |
| O  | -2.45073100 | 2.37809000  | 0.51639400  |
| C  | -2.15887400 | 3.75264500  | 0.23139900  |
| C  | -4.96743800 | -0.10839700 | -0.26202500 |
| H  | 4.13222200  | 0.94169100  | 1.64869900  |
| H  | 1.32575900  | -1.08738100 | -1.96143100 |
| H  | 3.74602100  | -0.73150900 | -2.29108400 |
| H  | -0.72832900 | 0.35081900  | 2.54027200  |
| H  | 1.63706300  | 0.99836200  | 2.97809800  |
| H  | -0.97801300 | -0.86790000 | -1.23277700 |
| H  | -2.41536500 | -2.61522800 | -0.39119300 |
| H  | -1.08606300 | -2.26797200 | 2.33868700  |
| H  | -2.77973100 | -1.90271800 | 1.98267400  |
| H  | -2.19557500 | -3.55883400 | 1.87074200  |
| H  | 0.49170100  | -3.04610400 | 0.42581400  |
| H  | -0.68114200 | -4.30491500 | 0.02107300  |
| H  | -0.14397800 | -3.16611300 | -1.22019500 |
| H  | -2.74329600 | 0.10623900  | 1.04661300  |
| H  | -2.56607900 | 4.31626100  | 1.06572700  |
| H  | -1.08171100 | 3.89958900  | 0.16051000  |
| H  | -2.63398200 | 4.05339300  | -0.70164200 |
| H  | -5.75020800 | -0.26997200 | -0.99997900 |
| H  | -5.09376800 | -0.80745800 | 0.57021500  |
| H  | -5.03638700 | 0.89855800  | 0.15694300  |
| Cl | 5.76351600  | 0.34732700  | -0.61936400 |

Compound **1b**, optimization level PCM- $\omega$ B97-XD/6-311++G(2d,p)

## Conformation #22

|    |             |             |             |
|----|-------------|-------------|-------------|
| C  | 3.16649500  | -0.77640900 | -1.02127000 |
| C  | 1.81482600  | -1.11154200 | -0.96910600 |
| C  | 0.93219100  | -0.59135700 | 0.00473500  |
| C  | 1.45088200  | 0.28751900  | 0.96378600  |
| C  | 2.78608400  | 0.63241100  | 0.92847600  |
| C  | 3.61952900  | 0.09892200  | -0.06162800 |
| C  | -0.36573700 | -1.16094900 | -0.25840900 |
| C  | -0.20417700 | -1.97374100 | -1.34103900 |
| N  | 1.09648200  | -1.94942500 | -1.77422200 |
| C  | -1.67668000 | -0.93144200 | 0.44814900  |
| C  | -1.57717400 | -0.97693300 | 1.99103600  |
| C  | -0.84137000 | -2.24022100 | 2.43945300  |
| C  | -2.95641300 | -0.93194400 | 2.65190700  |
| C  | -2.40687100 | 0.32887900  | -0.09166600 |
| C  | -3.14802700 | 0.07433600  | -1.40851700 |
| C  | -1.49451000 | 1.53209500  | -0.20826700 |
| O  | -3.25283500 | -1.03841800 | -1.86833400 |
| O  | -0.95666100 | 1.89726600  | -1.22392000 |
| O  | -1.33389100 | 2.13690600  | 0.96750200  |
| C  | -0.45283600 | 3.26770200  | 0.97867400  |
| C  | -3.80573500 | 1.25753200  | -2.06696100 |
| H  | 3.82680800  | -1.18293300 | -1.77615700 |
| H  | 0.81948900  | 0.70553000  | 1.73640900  |
| H  | 3.19542700  | 1.31310400  | 1.66330000  |
| H  | -0.94288900 | -2.57177900 | -1.85063300 |
| H  | 1.45827700  | -2.46612200 | -2.55660300 |
| H  | -2.32788800 | -1.76228700 | 0.16161100  |
| H  | -1.01413600 | -0.10800800 | 2.34157700  |
| H  | -1.36575500 | -3.13373000 | 2.08504000  |
| H  | 0.17980700  | -2.27701300 | 2.05826200  |
| H  | -0.79790700 | -2.28745900 | 3.52978900  |
| H  | -2.85997700 | -1.07343100 | 3.73045500  |
| H  | -3.47126600 | 0.01858700  | 2.50115100  |
| H  | -3.59722700 | -1.73099600 | 2.26560300  |
| H  | -3.20000700 | 0.60494900  | 0.60952100  |
| H  | -0.84825600 | 4.05733400  | 0.34078100  |
| H  | -0.41440500 | 3.59667700  | 2.01319900  |
| H  | 0.53857300  | 2.97595900  | 0.63269800  |
| H  | -4.65452500 | 0.92001300  | -2.65913900 |
| H  | -4.12458200 | 2.00270200  | -1.33658000 |
| H  | -3.07749600 | 1.73292600  | -2.72743200 |
| Cl | 5.31216400  | 0.56686900  | -0.07184700 |



Compound **1b**, optimization level PCM- $\omega$ B97-XD/6-311++G(2d,p)

## Conformation #23

|    |             |             |             |
|----|-------------|-------------|-------------|
| C  | -3.41501500 | 0.48862900  | 0.82219900  |
| C  | -2.05713900 | 0.74619300  | 1.00812900  |
| C  | -1.10090000 | 0.54443200  | -0.00920400 |
| C  | -1.52692900 | 0.06986500  | -1.25394300 |
| C  | -2.86568900 | -0.18902300 | -1.45736400 |
| C  | -3.78338100 | 0.02266100  | -0.41871600 |
| C  | 0.18063100  | 0.89323700  | 0.53494600  |
| C  | -0.05093800 | 1.28310700  | 1.82234400  |
| N  | -1.39025500 | 1.19967300  | 2.11157300  |
| C  | 1.50955200  | 0.80735800  | -0.16924900 |
| C  | 2.27785200  | 2.14597800  | -0.07006000 |
| C  | 1.47950400  | 3.25797800  | -0.75101000 |
| C  | 3.68925600  | 2.09750600  | -0.65306100 |
| C  | 2.34345800  | -0.38736700 | 0.36109900  |
| C  | 3.34232300  | -0.95023600 | -0.66124200 |
| C  | 1.44268500  | -1.53461000 | 0.79638400  |
| O  | 3.14938800  | -0.86619200 | -1.84979100 |
| O  | 1.36376600  | -1.95058400 | 1.92530800  |
| O  | 0.74761700  | -2.01850900 | -0.22550800 |
| C  | -0.25952700 | -2.98571100 | 0.08790400  |
| C  | 4.54749200  | -1.63531800 | -0.08279200 |
| H  | -4.14108000 | 0.64224600  | 1.60963000  |
| H  | -0.81565300 | -0.10592100 | -2.05211200 |
| H  | -3.21627800 | -0.55940200 | -2.41169200 |
| H  | 0.64384100  | 1.61863300  | 2.57652900  |
| H  | -1.80713700 | 1.43105300  | 2.99641400  |
| H  | 1.31984400  | 0.60621000  | -1.22757500 |
| H  | 2.36802100  | 2.39050400  | 0.99528000  |
| H  | 1.98540800  | 4.21928000  | -0.63693900 |
| H  | 1.38340900  | 3.05452700  | -1.82231000 |
| H  | 0.47595200  | 3.34952800  | -0.33259500 |
| H  | 3.67022500  | 1.81472600  | -1.70834000 |
| H  | 4.15450700  | 3.08261200  | -0.57501700 |
| H  | 4.33963700  | 1.39755700  | -0.12333800 |
| H  | 2.89029800  | -0.09640300 | 1.26005700  |
| H  | -1.00721200 | -2.53758100 | 0.74309200  |
| H  | -0.70826500 | -3.25835900 | -0.86293100 |
| H  | 0.18329500  | -3.85731800 | 0.56807900  |
| H  | 5.12323600  | -2.12518300 | -0.86499200 |
| H  | 5.17035200  | -0.89382800 | 0.42523200  |
| H  | 4.24131800  | -2.36158500 | 0.67453200  |
| Cl | -5.47808900 | -0.32792900 | -0.72060500 |

Compound **1b**, optimization level PCM- $\omega$ B97-XD/6-311++G(2d,p)

## Conformation #37

|    |             |             |             |
|----|-------------|-------------|-------------|
| C  | 3.54177700  | -0.66981800 | -1.04264400 |
| C  | 2.15842000  | -0.50118400 | -1.06505300 |
| C  | 1.46081900  | 0.18788200  | -0.05034800 |
| C  | 2.18397800  | 0.72672500  | 1.01898500  |
| C  | 3.55408700  | 0.56940100  | 1.05911500  |
| C  | 4.20703900  | -0.12368800 | 0.03140200  |
| C  | 0.06540500  | 0.16077400  | -0.39644100 |
| C  | -0.01484000 | -0.52206100 | -1.57598300 |
| N  | 1.23478300  | -0.91971800 | -1.98077700 |
| C  | -1.03603700 | 0.79862200  | 0.40916900  |
| C  | -1.52471900 | 2.13644700  | -0.19721300 |
| C  | -0.35671400 | 3.11057000  | -0.34630200 |
| C  | -2.63193300 | 2.77659000  | 0.64082300  |
| C  | -2.19997300 | -0.16596200 | 0.76396700  |
| C  | -1.69100400 | -1.53568900 | 1.21322000  |
| C  | -3.25133100 | -0.35887500 | -0.31100300 |
| O  | -2.06652900 | -2.55346700 | 0.67780500  |
| O  | -3.06384500 | -0.34989800 | -1.50159500 |
| O  | -4.44858000 | -0.55212100 | 0.23926500  |
| C  | -5.52779800 | -0.80328700 | -0.66792800 |
| C  | -0.71730500 | -1.55023900 | 2.35853800  |
| H  | 4.06762900  | -1.20047800 | -1.82552500 |
| H  | 1.68372800  | 1.26624100  | 1.81511000  |
| H  | 4.13106600  | 0.97820100  | 1.87809200  |
| H  | -0.88686800 | -0.75956600 | -2.16196900 |
| H  | 1.42957900  | -1.45128500 | -2.81130100 |
| H  | -0.59578700 | 1.05715300  | 1.37922300  |
| H  | -1.91938300 | 1.92254300  | -1.19465400 |
| H  | 0.07888300  | 3.34421600  | 0.63073600  |
| H  | 0.43324600  | 2.70179300  | -0.97821000 |
| H  | -0.69825500 | 4.04690200  | -0.79295400 |
| H  | -2.30209300 | 2.91739100  | 1.67550200  |
| H  | -2.88983700 | 3.75798100  | 0.23732100  |
| H  | -3.54885100 | 2.18353100  | 0.65749500  |
| H  | -2.71705000 | 0.24612300  | 1.63525900  |
| H  | -5.66993300 | 0.05003300  | -1.33033600 |
| H  | -5.32401300 | -1.69643900 | -1.25767100 |
| H  | -6.40525700 | -0.95067900 | -0.04487700 |
| H  | -0.69114900 | -2.54274200 | 2.80411600  |
| H  | 0.27844400  | -1.30931000 | 1.97634000  |
| H  | -0.97345300 | -0.80100500 | 3.10895800  |
| Cl | 5.95225200  | -0.29976200 | 0.12277400  |

Compound **1b**, optimization level PCM- $\omega$ B97-XD/6-311++G(2d,p)

## Conformation #44

|    |             |             |             |
|----|-------------|-------------|-------------|
| C  | -3.39197600 | -0.23915600 | 0.85715900  |
| C  | -2.05000100 | -0.45637400 | 1.16720400  |
| C  | -1.03883100 | -0.51212500 | 0.18323000  |
| C  | -1.40122200 | -0.33877600 | -1.15761600 |
| C  | -2.72340700 | -0.12432100 | -1.48461000 |
| C  | -3.69384200 | -0.07837300 | -0.47499000 |
| C  | 0.20646900  | -0.72837000 | 0.87237900  |
| C  | -0.10375000 | -0.79349200 | 2.19768700  |
| N  | -1.45338500 | -0.63490700 | 2.38418900  |
| C  | 1.58676600  | -0.87627800 | 0.29501400  |
| C  | 1.67096200  | -2.08539500 | -0.66853100 |
| C  | 1.25169500  | -3.36897500 | 0.04697400  |
| C  | 3.05483200  | -2.26881800 | -1.28999900 |
| C  | 2.08741000  | 0.42900400  | -0.38291300 |
| C  | 3.60966100  | 0.60843000  | -0.31003900 |
| C  | 1.47886800  | 1.64811400  | 0.29214300  |
| O  | 4.26416100  | 0.12280600  | 0.57997200  |
| O  | 1.79956800  | 2.05530400  | 1.38086100  |
| O  | 0.53641400  | 2.20308200  | -0.46079600 |
| C  | -0.21813100 | 3.25782000  | 0.14660700  |
| C  | 4.21784100  | 1.45484900  | -1.39214100 |
| H  | -4.15603100 | -0.19570700 | 1.62232900  |
| H  | -0.65635300 | -0.35657700 | -1.94341800 |
| H  | -3.01876800 | 0.01391900  | -2.51632400 |
| H  | 0.55162400  | -0.94474700 | 3.04154000  |
| H  | -1.92101900 | -0.63627000 | 3.27378600  |
| H  | 2.26849300  | -1.06426800 | 1.13003200  |
| H  | 0.96171100  | -1.90765300 | -1.48468100 |
| H  | 1.91864900  | -3.57159400 | 0.89126400  |
| H  | 0.23277600  | -3.30390000 | 0.43122600  |
| H  | 1.30525000  | -4.22036100 | -0.63514000 |
| H  | 3.05967000  | -3.15331300 | -1.93059700 |
| H  | 3.35066300  | -1.42359900 | -1.91571500 |
| H  | 3.81688100  | -2.40449100 | -0.51839200 |
| H  | 1.78248700  | 0.45262100  | -1.43106700 |
| H  | 0.43416300  | 4.08635000  | 0.41962800  |
| H  | -0.93898600 | 3.57006900  | -0.60349400 |
| H  | -0.73017100 | 2.88157500  | 1.03240900  |
| H  | 5.27056500  | 1.63876200  | -1.18925500 |
| H  | 4.11042700  | 0.94182100  | -2.35188400 |
| H  | 3.67917800  | 2.40218800  | -1.47845200 |
| Cl | -5.36521900 | 0.20137700  | -0.93639800 |
